# Supplementary material for: Divergent reactivity of acrylamides and β-chloroenones under base-controlled palladium catalysis: construction of spirooxindoles and furan-containing 3,3-disubstituted oxindoles
Source: Royal Society of Chemistry journal article supplement (doi:10.1039/d3qo01776a), 2023-11-22

## Supporting Information

### **Divergent reactivity of Acrylamides and $\beta$ -Chloroenones under Base-Controlled Palladium Catalysis: Construction of Spirooxindoles and Furan-containing 3,3-Disubstituted Oxindoles**

Jingli Zhang,<sup>‡a</sup> Weipeng Xu,<sup>‡b</sup> Du Wang,<sup>a</sup> Ye Yuan,<sup>c</sup> Yongqi Bai,<sup>a</sup> Minyan Wang,<sup>\*b</sup> Guanbin Gao,<sup>\*ac</sup> and Taolei Sun<sup>\*a</sup>

<sup>a</sup>Hubei Key Laboratory of Nanomedicine for Neurodegenerative Diseases, School of Chemistry, Chemical Engineering and Life Science, Wuhan University of Technology, Wuhan 430070, China

<sup>b</sup>State Key Laboratory of Coordination Chemistry, School of Chemistry and Chemical Engineering, Nanjing University, Nanjing 210023, China

<sup>c</sup>State Key Laboratory of Advanced Technology for Materials Synthesis and Processing, Wuhan University of Technology, Wuhan 430070, China

E-Mail for Minyan Wang: wangmy@nju.edu.cn

E-Mail for Guanbin Gao: gbgao@whut.edu.cn

E-Mail for Taolei Sun: suntl@whut.edu.cn

## Table of Contents

|                                                                   |      |
|-------------------------------------------------------------------|------|
| 1) General Considerations .....                                   | S3   |
| 2) Optimization of Conditions .....                               | S4   |
| 3) General procedures .....                                       | S7   |
| 4) Synthesis of acrylamides .....                                 | S10  |
| 5) Synthesis of $\beta$ -chloroenones .....                       | S11  |
| 6) Synthesis of spirooxindoles .....                              | S12  |
| 7) Synthesis of 3,3-disubstituted furan-containing oxindoles..... | S26  |
| 8) Mechanistic studies.....                                       | S39  |
| 9) Scale up and product derivatization experiments .....          | S44  |
| 10) X-Ray Crystal Structure .....                                 | S48  |
| 11) Computational Studies.....                                    | S75  |
| 12) References .....                                              | S149 |
| 13) NMR Spectra .....                                             | S150 |

## 1) General Considerations

Unless stated otherwise, all reactions were carried out under an inert atmosphere of dry argon, using oven-dried glassware (120 °C), while work-up and isolation of products from catalytic reactions were performed open to air on a benchtop using general techniques. Reaction monitoring was performed using thin-layer chromatography (TLC) on Merck KGaA TLC Silica Gel 60 F<sub>254</sub> plates. The developed plates were visualized with UV light (254 nm) or KMnO<sub>4</sub>. Solvent evaporation was carried out by a rotary evaporator at the appropriate temperature and pressure. Toluene was distilled over sodium (1% w:v) and benzophenone (1% w:v); 1,4-dioxane was purchased from Energy Chemical and stored with 3 Å molecular sieves; anhydrous *N,N*-dimethylformamide was purchased from Aldrich and stored with 3 Å molecular sieves; acetonitrile was purchased from Energy Chemical and stored with 3 Å molecular sieves. Silica gel flash chromatography was performed on 200-300 mesh silica gel. NMR characterization data was collected at 298 K on a Bruker AVANCE III 500 or a Varian Mercury 400 operating at 400 or 500 MHz for <sup>1</sup>H-NMR, 100 or 125 MHz for <sup>13</sup>C-NMR, and 470 MHz for <sup>19</sup>F-NMR. <sup>1</sup>H-NMR chemical shifts were recorded in parts per million (ppm, δ) relative to TMS (δ = 0.00 ppm) with the solvent resonance as the internal standard (CDCl<sub>3</sub>: δ = 7.26 ppm). Data for <sup>1</sup>H-NMR is reported as follows: chemical shift in ppm (δ), multiplicity (s = singlet, d = doublet, t = triplet, q = quartet, m = multiplet), coupling constant (Hz) and integration. <sup>13</sup>C-NMR chemical shifts were reported in ppm with the solvent as the internal standard (CDCl<sub>3</sub>: δ = 77.0 ppm). High-resolution mass spectra were obtained from the following spectrometers: Bruker micrOTOF-Q III (ESI) and JEOL-AccuTOF-DART. Infrared (IR) spectra were recorded on a VERTEX 80v FT-IR spectrophotometer. Data is presented in wavenumbers (cm<sup>-1</sup>). Melting points were obtained on a SGW® X-4 Melting Point Apparatus and uncorrected.

## 2) Optimization of Conditions

**Optimization procedure for 4aa or 5aa:** A flame-dried, 3-dram vial under argon atmosphere was charged with a stir bar, acrylamide **1a** (72.6 mg, 0.20 mmol, 1.0 equiv), Pd catalyst (5 mol % or 10 mol %), ligand (20 mol %, 0.20 equiv.) and anhydrous base (3.0 or 3.5 equiv.), and was purged with argon for 5 minutes. Anhydrous and degassed solvent (1.0 mL) was added and the mixture was stirred at room temperature for 5 minutes.  $\beta$ -chloroenone (*E*)-**2a** (94.5 mg, 0.4 mmol, 2.0 equiv.) was dissolved in anhydrous solvent (1.0 mL) and transferred to the vial via syringe, and the vial was then purged with argon for 5 minutes. A Teflon lined screw cap was fitted on the 3-dram vial. The vial was sealed with Teflon tape and placed in a preheated oil bath at the required temperature for 24 hours. The reaction mixture was then cooled down to room temperature and was filtered through a plug of silica gel using EtOAc. The filtrate was concentrated under reduced pressure and the residue was purified by silica gel flash column chromatography (15:1 – 5:1 Pentanes: Et<sub>2</sub>O) to afford products.

**Table S1.** Variation of reaction conditions for the formation of major product **4aa**.

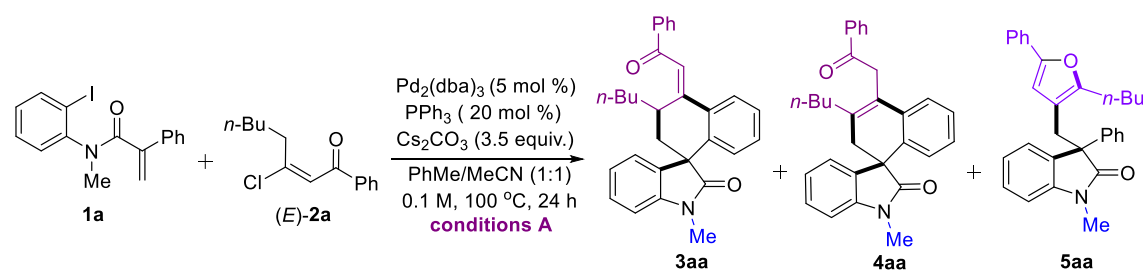

| Entry           | Variation from conditions A <sup>a</sup>                                                                                        | <b>3aa</b> (%) <sup>b</sup> | <b>4aa</b> (%) <sup>b</sup> | <b>5aa</b> (%) <sup>b</sup> |
|-----------------|---------------------------------------------------------------------------------------------------------------------------------|-----------------------------|-----------------------------|-----------------------------|
| 1               | none                                                                                                                            | < 1                         | (74)                        | 2                           |
| 2 <sup>c</sup>  | 10 mol % Pd(dba) <sub>2</sub> instead of 5 mol % Pd <sub>2</sub> (dba) <sub>3</sub>                                             | < 1                         | (61)                        | 6                           |
| 3 <sup>c</sup>  | 10 mol % Pd(OAc) <sub>2</sub> instead of 5 mol % Pd <sub>2</sub> (dba) <sub>3</sub>                                             | (13)                        | (59)                        | 7                           |
| 4 <sup>c</sup>  | 10 mol % Pd(PPh <sub>3</sub> ) <sub>4</sub> instead of 5 mol % Pd <sub>2</sub> (dba) <sub>3</sub> and 20 mol % PPh <sub>3</sub> | < 1                         | (48)                        | 3                           |
| 5 <sup>d</sup>  | 10 mol % Pd(TFA) <sub>2</sub> instead of 5 mol % Pd <sub>2</sub> (dba) <sub>3</sub>                                             | (17)                        | (50)                        | 7                           |
| 6 <sup>d</sup>  | 10 mol % [PdCl(allyl)] <sub>2</sub> instead of 5 mol % Pd <sub>2</sub> (dba) <sub>3</sub>                                       | (28)                        | (27)                        | 9                           |
| 7 <sup>c</sup>  | DPPF instead of PPh <sub>3</sub>                                                                                                | -                           | -                           | 4                           |
| 8 <sup>c</sup>  | DPPE instead of PPh <sub>3</sub>                                                                                                | -                           | -                           | 3                           |
| 9 <sup>c</sup>  | P( <i>o</i> -tol) <sub>3</sub> instead of PPh <sub>3</sub>                                                                      | 2                           | (46)                        | (29)                        |
| 10 <sup>c</sup> | K <sub>2</sub> CO <sub>3</sub> instead of Cs <sub>2</sub> CO <sub>3</sub>                                                       | 4                           | < 1                         | (70)                        |
| 11 <sup>c</sup> | EtN <sub>3</sub> instead of Cs <sub>2</sub> CO <sub>3</sub>                                                                     | < 1                         | < 1                         | (66)                        |
| 12 <sup>c</sup> | C <sub>s</sub> OPiv instead of Cs <sub>2</sub> CO <sub>3</sub>                                                                  | 4                           | 2                           | (22)                        |



|                 |                                                                                                  |      |      |      |
|-----------------|--------------------------------------------------------------------------------------------------|------|------|------|
| 13              | PhMe instead of PhMe/MeCN (1: 1)                                                                 | 6    | 9    | (14) |
| 14              | MeCN instead of PhMe/MeCN (1: 1)                                                                 | 5    | (67) | 8    |
| 15              | Dioxane instead of PhMe/MeCN (1: 1)                                                              | < 1  | (53) | 8    |
| 16              | DMF instead of PhMe/MeCN (1: 1)                                                                  | 1    | (17) | 2    |
| 17              | 2.5 mol % Pd <sub>2</sub> (dba) <sub>3</sub> and 10 mol % PPh <sub>3</sub>                       | 5    | (42) | (19) |
| 18              | 3.0 equiv. Cs <sub>2</sub> CO <sub>3</sub> instead of 3.5 equiv. Cs <sub>2</sub> CO <sub>3</sub> | (31) | (27) | 4    |
| 19              | 0.05 M instead of 0.1 M                                                                          | 3    | (47) | 8    |
| 20              | 0.2 M instead of 0.1 M                                                                           | < 1  | (61) | 6    |
| 21              | 80 °C instead of 100 °C                                                                          | (12) | (61) | 3    |
| 22              | 120 °C instead of 100 °C                                                                         | < 1  | 8    | (27) |
| 23              | -Br instead of -I                                                                                | < 1  | (68) | < 1  |
| 24 <sup>e</sup> | ( <i>Z</i> )- <b>2a</b> instead of ( <i>E</i> )- <b>2a</b>                                       | < 1  | (28) | 2    |

<sup>a</sup>Reaction conditions: **1a** (0.2 mmol), (*E*)-**2a** (0.4 mmol), catalyst (5 mol %), ligand (20 mol %), base (3.5 equiv.), solvent (2.0 mL), 100 °C, 24 h, sealed vial. <sup>b</sup>Yields were determined by <sup>1</sup>H NMR analysis using 1,3,5-trimethoxybenzene as an internal standard. Values in parentheses indicate isolated yields. <sup>c</sup>The reaction was performed in MeCN. <sup>d</sup>The reaction was performed at 90 °C. <sup>e</sup>Less reactivity observed of (*Z*)-**2a** might be due to the slower dehydrochlorination of (*Z*)-**2a**.<sup>1</sup>

**Table S2.** Variation of reaction conditions for the formation of major product **5aa**.

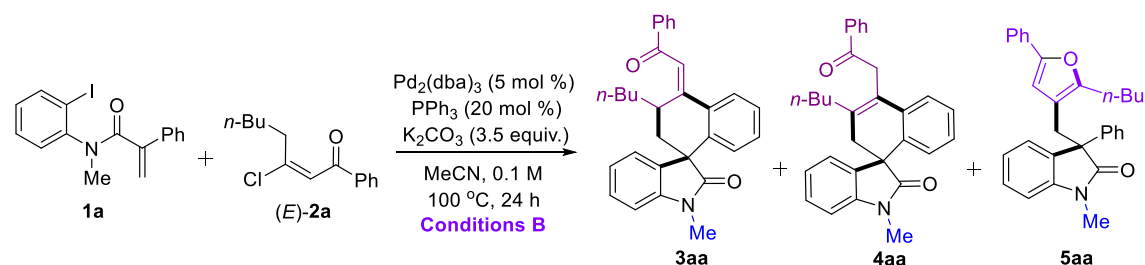

| Entry          | Variation from conditions B <sup>a</sup>                                                              | <b>3aa</b> (%) <sup>b</sup> | <b>4aa</b> (%) <sup>b</sup> | <b>5aa</b> (%) <sup>b</sup> |
|----------------|-------------------------------------------------------------------------------------------------------|-----------------------------|-----------------------------|-----------------------------|
| 1              | none                                                                                                  | 4                           | < 1                         | (70)                        |
| 2 <sup>c</sup> | 10 mol % Pd(OAc) <sub>2</sub> and 20 mol % Johnphos                                                   | 4                           | < 1                         | (40)                        |
| 3 <sup>c</sup> | 10 mol % Pd(dba) <sub>2</sub> and 20 mol % P( <i>o</i> -CF <sub>3</sub> Ph) <sub>3</sub>              | 7                           | 2                           | (58)                        |
| 4 <sup>c</sup> | 10 mol % [PdCl(allyl)] <sub>2</sub> and 20 mol % P( <i>o</i> -CF <sub>3</sub> Ph) <sub>3</sub>        | < 1                         | < 1                         | (41)                        |
| 5 <sup>c</sup> | 5 mol % Pd <sub>2</sub> (dba) <sub>3</sub> and 20 mol % P( <i>o</i> -CF <sub>3</sub> Ph) <sub>3</sub> | 6                           | 7                           | (54)                        |
| 6              | 10 mol % PdCl <sub>2</sub> instead of 5 mol % Pd <sub>2</sub> (dba) <sub>3</sub>                      | < 1                         | < 1                         | (43)                        |
| 7              | EtN <sub>3</sub> instead of K <sub>2</sub> CO <sub>3</sub>                                            | < 1                         | < 1                         | (66)                        |
| 8              | C <sub>8</sub> OPiv instead of K <sub>2</sub> CO <sub>3</sub>                                         | 4                           | 2                           | (22)                        |
| 9              | PhMe/MeCN (1: 1) instead of MeCN                                                                      | 2                           | 3                           | (49)                        |

|                 |                                                                                                |     |     |      |
|-----------------|------------------------------------------------------------------------------------------------|-----|-----|------|
| 10              | Dioxane instead of MeCN                                                                        | 2   | 2   | (30) |
| 11              | 2.5 mol % Pd <sub>2</sub> (dba) <sub>3</sub> and 10 mol % PPh <sub>3</sub>                     | < 1 | < 1 | (52) |
| 12              | 3.0 equiv. K <sub>2</sub> CO <sub>3</sub> instead of 3.5 equiv. K <sub>2</sub> CO <sub>3</sub> | < 1 | 3   | (58) |
| 13              | 0.05 M instead of 0.1 M                                                                        | < 1 | -   | (69) |
| 14              | 0.2 M instead of 0.1 M                                                                         | 2   | 4   | (64) |
| 15              | 80 °C instead of 100 °C                                                                        | 2   | -   | (43) |
| 16              | 120 °C instead of 100 °C                                                                       | 3   | 2   | (57) |
| 17              | -Br instead of -I                                                                              | -   | 3   | (33) |
| 18 <sup>d</sup> | ( <i>Z</i> )- <b>2a</b> instead of ( <i>E</i> )- <b>2a</b>                                     | -   | 2   | (10) |

---

<sup>a</sup>Reaction conditions: **1a** (0.2 mmol), (*E*)-**2a** (0.4 mmol), catalyst (5 mol %), ligand (20 mol %), base (0.7 mmol), solvent (2.0 mL), 100 °C, 24 h, sealed vial. <sup>b</sup>Yields were determined by <sup>1</sup>H NMR analysis using 1,3,5-trimethoxybenzene as an internal standard. Values in parentheses indicate isolated yields. <sup>c</sup>Reaction conditions: **1a** (0.2 mmol), (*E*)-**2a** (0.4 mmol), catalyst (5 mol % or 10 mol %), ligand (20 mol %), Cs<sub>2</sub>CO<sub>3</sub> (0.7 mmol), PhMe/MeCN (1:1, 2.0 mL), 90 °C, 22 h, sealed vial. <sup>d</sup>Less reactivity observed of (*Z*)-**2a** might be due to the slower dehydrochlorination of (*Z*)-**2a**.<sup>1</sup>

### 3) General procedures

All standard reagents were purchased from Sigma Aldrich, TCI, Aladdin, Energy Chemical, and were used without further purification. Acrylamides and  $\beta$ -chloroenones were prepared according to literature procedures.

#### General Procedure 1: Synthesis of acrylamides

The desired acrylamide was prepared following literature procedure.

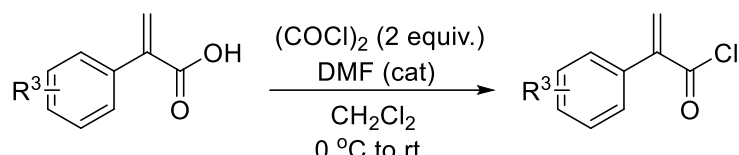

Oxalyl chloride (2.0 equiv.) was added dropwise to a solution of substituted 2-phenylacrylic acid (1.0 equiv.) and DMF (4 drops) in  $\text{CH}_2\text{Cl}_2$  (0.4 M) at 0 °C. After 5 minutes, the reaction was allowed to warm to room temperature and stirred until the reaction was completed by TLC. The excess oxalyl chloride was removed under vacuum and the resulting acyl chloride was redissolved in  $\text{CH}_2\text{Cl}_2$ .

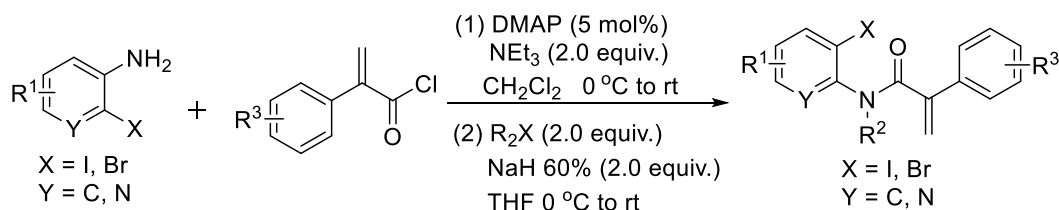

A solution of the substituted 2-iodoaniline or 2-bromoaniline (1.0 equiv.), DMAP (0.05 equiv.) and  $\text{NEt}_3$  (2.0 equiv.) was prepared in  $\text{CH}_2\text{Cl}_2$  (0.5 M) and cooled to 0 °C. The acyl chloride solution was added dropwise into the solution. After 5 minutes, the reaction was allowed to warm to room temperature and stirred overnight. The reaction was quenched with a saturated  $\text{NaHCO}_3$  solution and extracted with  $\text{CH}_2\text{Cl}_2$  (3x). The combined organic layers were washed with brine, dried over  $\text{Na}_2\text{SO}_4$  and concentrated *in vacuo*. The crude unsubstituted acrylamide was used in the next step without further purification.

A solution of the unsubstituted acrylamide (1.0 equiv.) in THF (0.2 M) was prepared and cooled to 0 °C. NaH (60 % in mineral oil, 2.0 equiv.) was added to the solution and the mixture was stirred at 0 °C. After stirring for 20 min,  $\text{R}^2\text{-X}$  (2.0 equiv.) was added dropwise and the reaction mixture was allowed to warm to room temperature and stirred overnight. After completion of the reaction (monitored by TLC), the reaction was quenched with water and extracted with EtOAc (3x). The combined organic layers were washed with brine, dried with anhydrous  $\text{Na}_2\text{SO}_4$  and concentrated *in vacuo*. The crude product was purified by silica gel flash column chromatography using the indicated mobile phase.

## General Procedure 2: Synthesis of $\beta$ -chloroenones

The desired  $\beta$ -chloroenone was prepared following literature procedure.

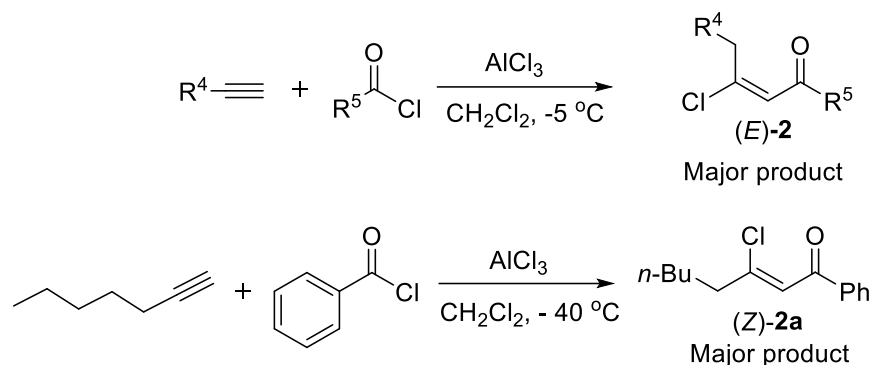

To a stirred suspension of aluminum chloride (1.47 g, 11 mmol, 1.1 equiv.) in dry dichloromethane (10 mL) at  $-5\text{ }^\circ\text{C}$  (*E*-selective) or  $-40\text{ }^\circ\text{C}$  (*Z*-selective) were added alkynes (10 mmol, 1.0 equiv.) and acyl chloride (10 mmol, 1.0 equiv.) dropwise at the same time. Stirring of the resulting solution was continued at the same temperature until the reaction was completed by TLC. The reaction was then quenched with  $\text{H}_2\text{O}$ , extracted with dichloromethane, and washed with brine. After drying over  $\text{MgSO}_4$ , the solution was concentrated under reduced pressure, and the crude product was purified by silica gel flash column chromatography using the indicated mobile phase.

## General Procedure 3: Synthesis of spirooxindoles

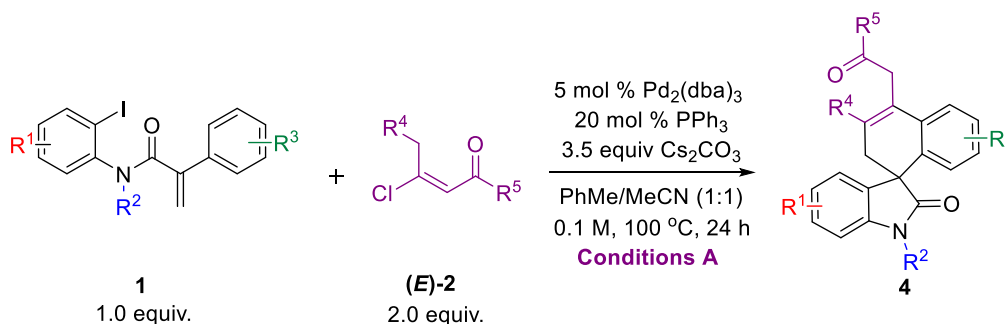

A flame-dried, 3-dram vial under argon atmosphere was charged with a stir bar, acrylamide **1** (0.20 mmol, 1.0 equiv.),  $\text{Pd}_2(\text{dba})_3$  (9.2 mg, 0.01 mmol, 5 mol %),  $\text{PPh}_3$  (10.5 mg, 0.04 mmol, 20 mol %) and  $\text{Cs}_2\text{CO}_3$  (228.1 mg, 0.7 mmol, 3.5 equiv.), and was purged with argon for 5 minutes. Anhydrous and degassed PhMe (0.5 mL) and MeCN (0.5 mL) were added and the mixture was stirred at room temperature for 5 minutes. (*E*)- $\beta$ -chloroenone **2** (0.4 mmol, 2.0 equiv.) was dissolved in anhydrous PhMe: MeCN (1:1) (1.0 mL) and transferred to the vial via syringe, and the vial was then purged with argon for 5 minutes. A Teflon lined screw cap was fitted on the 3-dram vial. The vial was sealed with Teflon tape and placed in a preheated oil bath at  $100\text{ }^\circ\text{C}$  for 24 hours. The reaction mixture was then cooled down to room temperature and was filtered through a plug of silica gel using EtOAc. The filtrate was concentrated under reduced pressure and the residue was purified by silica gel flash column chromatography using the indicated mobile phase.

#### General Procedure 4: Synthesis of 3,3-disubstituted furan-containing oxindoles

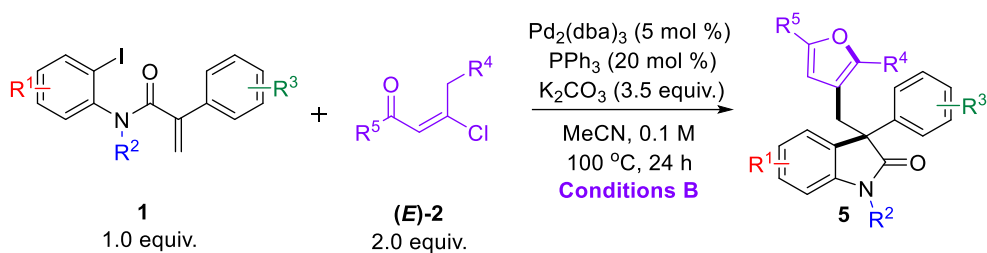

A flame-dried, 3-dram vial under argon atmosphere was charged with acrylamide **1** (0.20 mmol, 1.0 equiv.),  $\text{Pd}_2(\text{dba})_3$  (9.2 mg, 0.01 mmol, 5 mol %),  $\text{PPh}_3$  (10.5 mg, 0.04 mmol, 20 mol %) and  $\text{K}_2\text{CO}_3$  (96.7 mg, 0.7 mmol, 3.5 equiv.), and was purged with argon for 5 minutes. Anhydrous and degassed MeCN (1.0 mL) were added and the mixture was stirred at room temperature for 5 minutes. (*E*)- $\beta$ -chloroenone **2** (0.4 mmol, 2.0 equiv.) was dissolved in anhydrous MeCN (1.0 mL) and transferred to the vial via syringe, and the vial was then purged with argon for 5 minutes. A Teflon lined screw cap was fitted on the 3-dram vial. The vial was sealed with Teflon tape and placed in a preheated oil bath at 100 °C for 24 hours. The reaction mixture was then cooled down to room temperature and was filtered through a plug of silica gel using EtOAc. The filtrate was concentrated under reduced pressure and the residue was purified by silica gel flash column chromatography using the indicated mobile phase.

## 4) Synthesis of acrylamides

All acrylamides were synthesized according to literature procedures.<sup>2</sup>

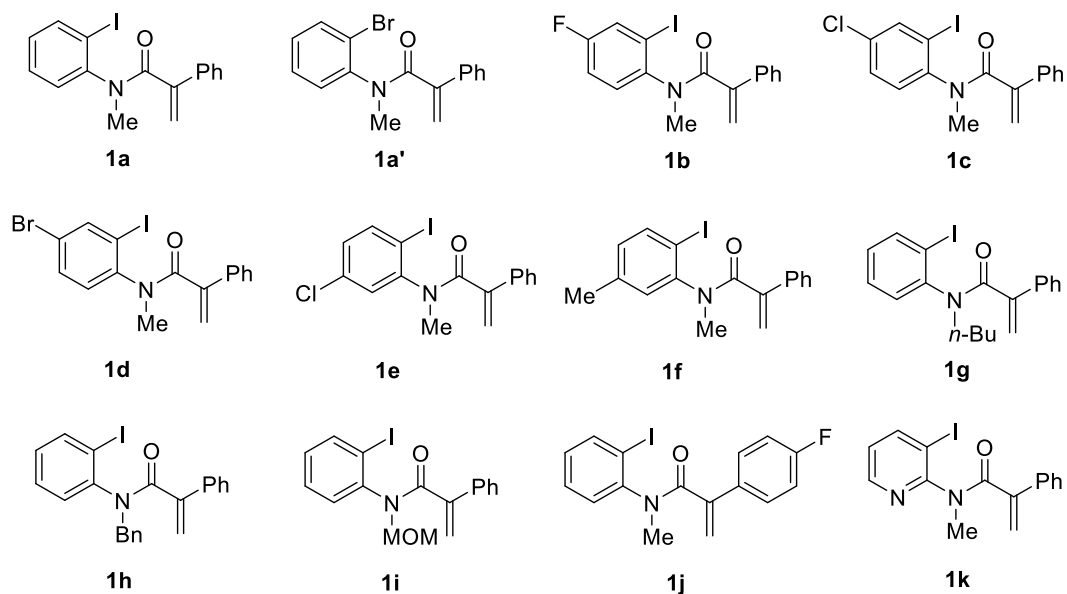

**1a, 1b, 1d, 1e, 1h, 1i, 1j**: H. Yoon, A. Lossouarn, F. Landau, M. Lautens, *Org. Lett.* **2016**, 18, 6324-6327.

**1a', 1c, 1f, 1g**: C. Shao, Z. Wu, X. Ji, B. Zhou, Y. Zhang, *Chem. Commun.* **2017**, 53, 10429-10432.

**1k**: G. Xiao, L. Chen, G. Deng, J. Liu, Y. Liang, *Tetrahedron Lett.* **2018**, 59, 1836-1840.

## 5) Synthesis of $\beta$ -chloroenones

All  $\beta$ -chloroenones were synthesized according to literature procedures.<sup>1,3</sup>

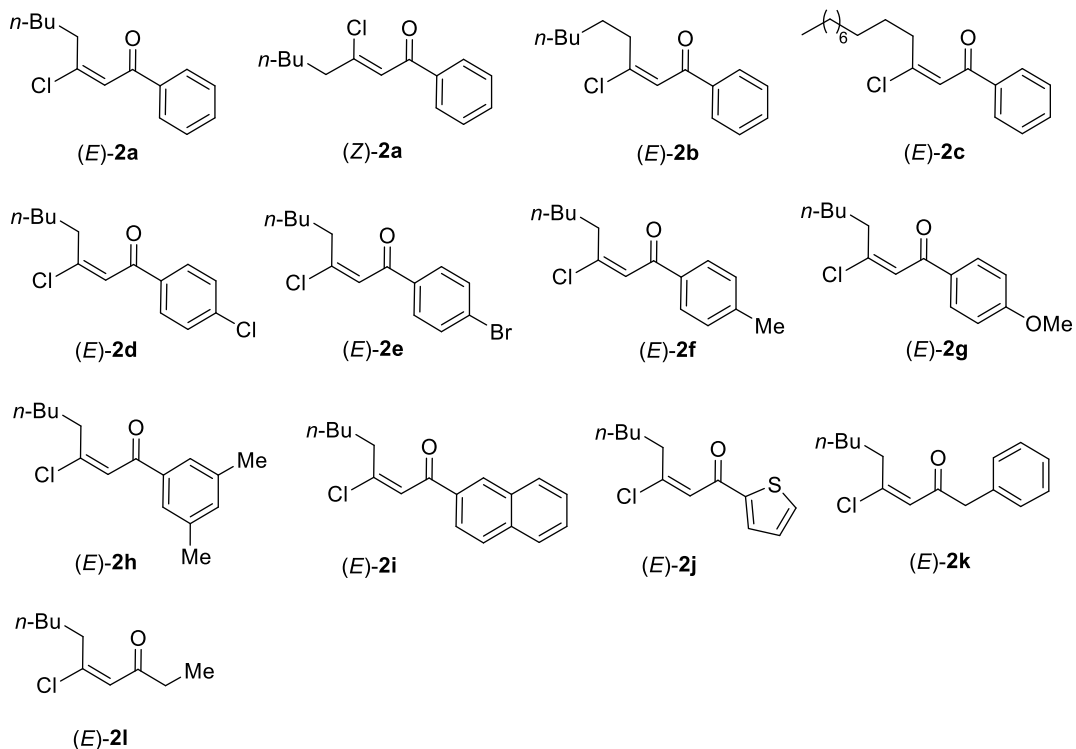

(E)-2a, (Z)-2a, (E)-2c, (E)-2e, (E)-2f, (E)-2g, (E)-2k, (E)-2l: H. Y. Kim, J.-Y. Li, K. Oh, *J. Org. Chem.* **2012**, 77, 11132-11145.

(E)-2b: T. Kashiwabara, M. Tanaka, *Adv. Synth. Catal.* **2011**, 353, 1485-1490.

(E)-2d, (E)-2h: Y. Zhang, J. Zhang, Y. Yuan, L. Liu, B. Chen, T. Sun, *Eur. J. Org. Chem.* **2020**, 1976-1986.

(E)-2i, (E)-2j: R. Hou, Z. Wang, J. Peng, Y. Yuan, J. Zhang, D. Wang, T. Sun, *Asian J. Org. Chem.* **2021**, 10, 3334-3342.

## 6) Synthesis of spirooxindoles

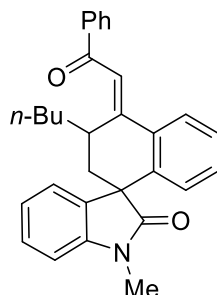

### **(*E*)-3'-Butyl-1-methyl-4'-(2-oxo-2-phenylethylidene)-3',4'-dihydro-2'*H*-spiro[indoline-3,1'-naphthalen]-2-one (3aa)**

Prepared according to General Procedure **3** or **4** using starting material **1a** and (*E*)- $\beta$ -chloroenone **2a**. The crude mixture was purified via silica-gel flash chromatography using 5:1 Pentanes: Et<sub>2</sub>O v:v as the mobile phase. The title compound was obtained as a yellow sticky oil (< 1% - 28 % yields).

**<sup>1</sup>H NMR** (400 MHz, CDCl<sub>3</sub>)  $\delta$  7.99 (d,  $J = 7.2$  Hz, 2H), 7.41 (t,  $J = 7.4$  Hz, 1H), 7.36-7.29 (m, 3H), 7.16 (d,  $J = 8.0$  Hz, 1H), 7.12-7.06 (m, 2H), 6.95 (t,  $J = 7.6$  Hz, 1H), 6.93 (t,  $J = 8.0$  Hz, 1H), 6.84 (t,  $J = 7.6$  Hz, 1H), 6.46 (d,  $J = 8.8$  Hz, 2H), 3.41-3.33 (m, 1H), 3.27 (s, 3H), 2.42 (dd,  $J_1 = 13.6$  Hz,  $J_2 = 4.6$  Hz, 1H), 2.01 (dd,  $J_1 = 13.6$  Hz,  $J_2 = 11.0$  Hz, 1H), 1.89-1.80 (m, 1H), 1.56-1.48 (m, 1H), 1.47-1.32 (m, 4H), 0.92 (t,  $J = 7.2$  Hz, 3H). **<sup>13</sup>C NMR** (100 MHz, CDCl<sub>3</sub>)  $\delta$  196.5, 179.0, 153.0, 143.6, 137.8, 136.7, 135.7, 135.6, 132.5, 130.5, 129.3, 129.3, 128.3, 128.2, 127.0, 126.6, 124.0, 123.2, 121.6, 108.1, 52.1, 40.2, 38.7, 33.8, 29.1, 26.4, 22.8, 14.0. **IR** (neat, cm<sup>-1</sup>):  $\nu$  3057, 3032, 2956, 2929, 2871, 1713, 1612, 1494, 1470, 1374, 1349, 1254, 1186, 1081, 1023, 949, 932, 813, 759, 694. **HRMS** (DART):  $m/z$  calcd for C<sub>30</sub>H<sub>29</sub>NO<sub>2</sub>+H<sup>+</sup>: 436.2271 [M+H]<sup>+</sup>; found: 436.2279.

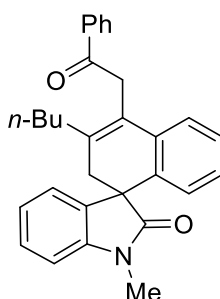

### **3'-Butyl-1-methyl-4'-(2-oxo-2-phenylethyl)-2'*H*-spiro[indoline-3,1'-naphthalen]-2-one (4aa)**

Prepared according to General Procedure **3** using starting material **1a** and (*E*)- $\beta$ -chloroenone **2a**. The crude mixture was purified via silica-gel flash chromatography using 5:1 Pentanes: Et<sub>2</sub>O v:v as the mobile phase. The title compound was obtained as a yellow solid (64.4 mg, 0.148 mmol, 74 % yield, MP = 71-72 °C).

**<sup>1</sup>H NMR** (400 MHz, CDCl<sub>3</sub>)  $\delta$  8.13 (d,  $J = 8.0$  Hz, 2H), 7.74 (d,  $J = 7.6$  Hz, 1H), 7.63



(t,  $J = 7.6$  Hz, 1H), 7.54 (t,  $J = 7.6$  Hz, 2H), 7.24 (t,  $J = 7.6$  Hz, 1H), 7.07 (t,  $J = 8.0$  Hz, 2H), 7.01 (d,  $J = 7.2$  Hz, 1H), 6.97 (d,  $J = 7.2$  Hz, 1H), 6.89 (d,  $J = 8.0$  Hz, 1H), 6.77 (d,  $J = 7.6$  Hz, 1H), 4.51 (d,  $J = 18.0$  Hz, 1H), 4.30 (d,  $J = 18.0$  Hz, 1H), 3.36 (s, 3H), 3.23 (d,  $J = 16.4$  Hz, 1H), 2.34 (d,  $J = 16.4$  Hz, 1H), 2.28-2.15 (m, 2H), 1.39-1.31 (m, 2H), 1.30-1.24 (m, 2H), 0.82 (t,  $J = 7.0$  Hz, 3H).  $^{13}\text{C}$  NMR (100 MHz,  $\text{CDCl}_3$ )  $\delta$  197.6, 180.3, 141.3, 137.0, 136.4, 135.0, 134.7, 134.2, 133.3, 128.8, 128.2, 128.0, 127.7, 127.1, 125.7, 124.4, 124.3, 123.5, 123.1, 108.1, 52.7, 38.5, 37.8, 34.5, 29.4, 26.6, 22.7, 13.9. **IR** (neat,  $\text{cm}^{-1}$ ):  $\nu$  3056, 3025, 2955, 2929, 2869, 1712, 1686, 1609, 1597, 1491, 1469, 1373, 1348, 1212, 1128, 1090, 989, 754, 690. **HRMS** (DART):  $m/z$  calcd for  $\text{C}_{30}\text{H}_{29}\text{NO}_2 + \text{H}^+$ : 436.2271  $[\text{M} + \text{H}]^+$ ; found: 436.2278.

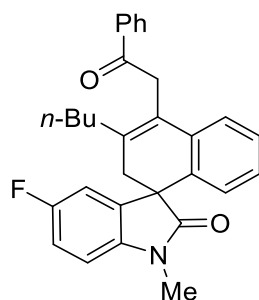

**3'-Butyl-5-fluoro-1-methyl-4'-(2-oxo-2-phenylethyl)-2'H-spiro[indoline-3,1'-naphthalen]-2-one (4ba)**

Prepared according to General Procedure **3** using starting material **1b** and (*E*)- $\beta$ -chloroenone **2a**. The crude mixture was purified via silica-gel flash chromatography using 5:1 Pentanes:  $\text{Et}_2\text{O}$  v:v as the mobile phase. The title compound was obtained as a yellow solid (67.1 mg, 0.148 mmol, 74 % yield, MP = 184-185  $^\circ\text{C}$ ).

$^1\text{H}$  NMR (500 MHz,  $\text{CDCl}_3$ )  $\delta$  8.14 (d,  $J = 7.5$  Hz, 2H), 7.71 (dd,  $J_1 = 8.5$  Hz,  $J_2 = 2.5$  Hz, 1H), 7.63 (t,  $J = 7.3$  Hz, 1H), 7.54 (t,  $J = 7.5$  Hz, 2H), 7.11 (t,  $J = 7.5$  Hz, 1H), 7.06 (d,  $J = 7.5$  Hz, 1H), 7.02 (t,  $J = 7.3$  Hz, 1H), 6.94 (td,  $J_1 = 8.8$  Hz,  $J_2 = 2.5$  Hz, 1H), 6.80 (dd,  $J_1 = 8.8$  Hz,  $J_2 = 4.0$  Hz, 1H), 6.78 (d,  $J = 7.5$  Hz, 1H), 4.53 (d,  $J = 17.5$  Hz, 1H), 4.29 (d,  $J = 18.0$  Hz, 1H), 3.35 (s, 3H), 3.26 (d,  $J = 16.5$  Hz, 1H), 2.30 (d,  $J = 16.5$  Hz, 1H), 2.26-2.15 (m, 2H), 1.40-1.31 (m, 2H), 1.30-1.25 (m, 2H), 0.83 (t,  $J = 7.3$  Hz, 3H).  $^{13}\text{C}$  NMR (125 MHz,  $\text{CDCl}_3$ )  $\delta$  197.4, 180.0, 159.4 (d,  $J = 239.0$  Hz), 137.3 (d,  $J = 1.8$  Hz), 136.9, 136.2, 135.5 (d,  $J = 8.6$  Hz), 134.9, 134.2, 133.3, 128.8, 128.2, 128.0, 127.2, 125.7, 124.6, 123.6, 114.3 (d,  $J = 23.8$  Hz), 112.8 (d,  $J = 25.4$  Hz), 108.5 (d,  $J = 7.9$  Hz), 53.1, 38.4, 37.6, 34.5, 29.4, 26.7, 22.7, 13.8.  $^{19}\text{F}$  NMR (470 MHz,  $\text{CDCl}_3$ ):  $\delta$  -114.49 – -114.53 (m, 1F). **IR** (neat,  $\text{cm}^{-1}$ ):  $\nu$  3057, 2956, 2930, 2870, 1703, 1686, 1622, 1492, 1449, 1359, 1276, 1209, 1124, 994, 907, 818, 768, 688. **HRMS** (ESI):  $m/z$  calcd for  $\text{C}_{30}\text{H}_{28}\text{FNO}_2 + \text{Na}^+$ : 476.1996  $[\text{M} + \text{Na}]^+$ ; found: 476.1999.

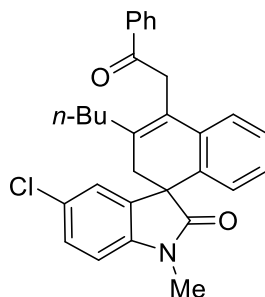

**3'-Butyl-5-chloro-1-methyl-4'-(2-oxo-2-phenylethyl)-2'H-spiro[indoline-3,1'-naphthalen]-2-one (4ca)**

Prepared according to General Procedure **3** using starting material **1c** and (*E*)- $\beta$ -chloroenone **2a**. The crude mixture was purified via silica-gel flash chromatography using 5:1 Pentanes: Et<sub>2</sub>O v:v as the mobile phase. The title compound was obtained as a yellow solid (63.8 mg, 0.136 mmol, 68 % yield, MP = 80-82 °C).

<sup>1</sup>H NMR (500 MHz, CDCl<sub>3</sub>)  $\delta$  8.15 (d, *J* = 7.5 Hz, 2H), 7.89 (d, *J* = 1.5 Hz, 1H), 7.63 (t, *J* = 7.3 Hz, 1H), 7.54 (t, *J* = 7.5 Hz, 2H), 7.22 (dd, *J*<sub>1</sub> = 8.0 Hz, *J*<sub>2</sub> = 2.0 Hz, 1H), 7.11 (t, *J* = 7.5 Hz, 1H), 7.06 (d, *J* = 7.5 Hz, 1H), 7.01 (t, *J* = 7.5 Hz, 1H), 6.80 (d, *J* = 8.5 Hz, 1H), 6.76 (d, *J* = 7.5 Hz, 1H), 4.52 (d, *J* = 17.5 Hz, 1H), 4.29 (d, *J* = 18.0 Hz, 1H), 3.34 (s, 3H), 3.24 (d, *J* = 16.0 Hz, 1H), 2.30 (d, *J* = 16.5 Hz, 1H), 2.26-2.14 (m, 2H), 1.39-1.32 (m, 2H), 1.31-1.26 (m, 2H), 0.83 (t, *J* = 7.3 Hz, 3H). <sup>13</sup>C NMR (125 MHz, CDCl<sub>3</sub>)  $\delta$  197.3, 179.8, 140.0, 137.0, 136.2, 135.5, 135.1, 134.1, 133.3, 128.8, 128.3, 128.2, 128.1, 128.0, 127.2, 125.7, 125.0, 124.7, 123.7, 109.1, 52.9, 38.5, 37.7, 34.4, 29.5, 26.7, 22.7, 13.9. IR (neat, cm<sup>-1</sup>):  $\nu$  3061, 3026, 2955, 2929, 2870, 1716, 1688, 1607, 1487, 1420, 1344, 1213, 1104, 989, 810, 754, 690. HRMS (ESI): *m/z* calcd for C<sub>30</sub>H<sub>28</sub>ClNO<sub>2</sub>+Na<sup>+</sup>: 492.1701 [M+Na]<sup>+</sup>; found: 492.1692.

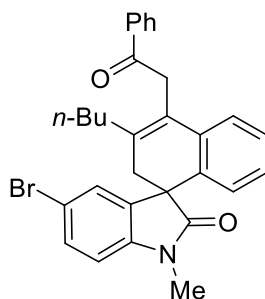

**5-Bromo-3'-butyl-1-methyl-4'-(2-oxo-2-phenylethyl)-2'H-spiro[indoline-3,1'-naphthalen]-2-one (4da)**

Prepared according to General Procedure **3** using starting material **1d** and (*E*)- $\beta$ -chloroenone **2a**. The crude mixture was purified via silica-gel flash chromatography using 5:1 Pentanes: Et<sub>2</sub>O v:v as the mobile phase. The title compound was obtained as a yellow solid (50.3 mg, 0.098 mmol, 49 % yield, MP = 83-84 °C).

<sup>1</sup>H NMR (500 MHz, CDCl<sub>3</sub>)  $\delta$  8.15 (d, *J* = 7.5 Hz, 2H), 8.02 (d, *J* = 2.0 Hz, 1H), 7.63 (t, *J* = 7.5 Hz, 1H), 7.54 (t, *J* = 7.8 Hz, 2H), 7.38 (dd, *J*<sub>1</sub> = 8.3 Hz, *J*<sub>2</sub> = 2.0 Hz, 1H), 7.11 (t, *J* = 7.5 Hz, 1H), 7.06 (d, *J* = 7.5 Hz, 1H), 7.02 (t, *J* = 7.5 Hz, 1H), 6.76 (d, *J* = 8.5 Hz, 1H), 6.75 (d, *J* = 8.5 Hz, 1H), 4.51 (d, *J* = 18.0 Hz, 1H), 4.29 (d, *J* = 18.5 Hz,

1H), 3.34 (s, 3H), 3.23 (d,  $J = 16.5$  Hz, 1H), 2.30 (d,  $J = 16.0$  Hz, 1H), 2.27-2.21 (m, 1H), 2.20-2.14 (m, 1H), 1.38-1.31 (m, 2H), 1.30-1.25 (m, 2H), 0.83 (t,  $J = 7.3$  Hz, 3H).  $^{13}\text{C}$  NMR (125 MHz,  $\text{CDCl}_3$ )  $\delta$  197.2, 179.7, 140.5, 137.0, 136.1, 135.8, 135.1, 134.0, 133.3, 130.9, 128.8, 128.2, 128.1, 127.7, 127.2, 125.7, 124.7, 123.7, 115.7, 109.6, 52.8, 38.5, 37.7, 34.4, 29.5, 26.7, 22.7, 13.9. IR (neat,  $\text{cm}^{-1}$ ):  $\nu$  3060, 3026, 2955, 2928, 2869, 1716, 1687, 1604, 1485, 1417, 1342, 1250, 1212, 1103, 989, 808, 754, 690. HRMS (ESI):  $m/z$  calcd for  $\text{C}_{30}\text{H}_{28}\text{BrNO}_2 + \text{Na}^+$ : 536.1196  $[\text{M} + \text{Na}]^+$ ; found: 536.1194.

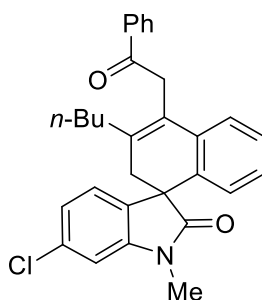

**3'-Butyl-6-chloro-1-methyl-4'-(2-oxo-2-phenylethyl)-2'H-spiro[indoline-3,1'-naphthalen]-2-one (4ea)**

Prepared according to General Procedure 3 using starting material 1e and (*E*)- $\beta$ -chloroenone 2a. The crude mixture was purified via silica-gel flash chromatography using 5:1 Pentanes:  $\text{Et}_2\text{O}$  v:v as the mobile phase. The title compound was obtained as a pale yellow solid (61.9 mg, 0.132 mmol, 66 % yield, MP = 86-88 °C).

$^1\text{H}$  NMR (500 MHz,  $\text{CDCl}_3$ )  $\delta$  8.11 (d,  $J = 7.0$  Hz, 2H), 7.75 (d,  $J = 8.0$  Hz, 1H), 7.63 (t,  $J = 7.5$  Hz, 1H), 7.54 (t,  $J = 7.5$  Hz, 2H), 7.10 (td,  $J_1 = 7.5$  Hz,  $J_2 = 1.5$  Hz, 1H), 7.06 (dd,  $J_1 = 7.5$  Hz,  $J_2 = 1.5$  Hz, 1H), 7.01 (td,  $J_1 = 7.3$  Hz,  $J_2 = 1.5$  Hz, 1H), 6.95 (dd,  $J_1 = 8.0$  Hz,  $J_2 = 2.0$  Hz, 1H), 6.88 (d,  $J = 2.0$  Hz, 1H), 6.75 (dd,  $J_1 = 7.8$  Hz,  $J_2 = 1.5$  Hz, 1H), 4.52 (dd,  $J_1 = 18.0$  Hz,  $J_2 = 2.0$  Hz, 1H), 4.28 (d,  $J = 18.0$  Hz, 1H), 3.34 (s, 3H), 3.22 (d,  $J = 16.5$  Hz, 1H), 2.28 (d,  $J = 16.5$  Hz, 1H), 2.25-2.13 (m, 2H), 1.37-1.30 (m, 2H), 1.29-1.25 (m, 2H), 0.82 (t,  $J = 7.0$  Hz, 3H).  $^{13}\text{C}$  NMR (125 MHz,  $\text{CDCl}_3$ )  $\delta$  197.6, 180.3, 142.6, 136.9, 136.2, 134.9, 134.2, 133.8, 133.3, 132.5, 128.8, 128.1, 127.9, 127.2, 125.6, 125.5, 124.5, 123.6, 122.8, 108.8, 52.4, 38.5, 37.7, 34.4, 29.4, 26.7, 22.7, 13.8. IR (neat,  $\text{cm}^{-1}$ ):  $\nu$  3060, 3026, 2955, 2928, 2870, 1719, 1686, 1605, 1492, 1447, 1369, 1322, 1245, 1212, 1078, 958, 840, 753, 690. HRMS (DART):  $m/z$  calcd for  $\text{C}_{30}\text{H}_{28}\text{ClNO}_2 + \text{H}^+$ : 470.1881  $[\text{M} + \text{H}]^+$ ; found: 470.1889.

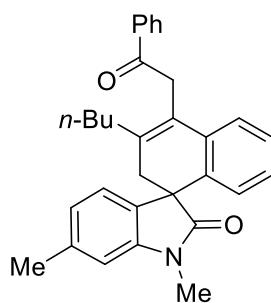

**3'-Butyl-1,6-dimethyl-4'-(2-oxo-2-phenylethyl)-2'H-spiro[indoline-3,1'-**

### naphthalen]-2-one (4fa)

General Procedure 3 using starting material **1f** and (*E*)- $\beta$ -chloroenone **2a**. The crude mixture was purified via silica-gel flash chromatography using 5:1 Pentanes: Et<sub>2</sub>O v:v as the mobile phase. The title compound was obtained as a pale yellow solid (66.5 mg, 0.148 mmol, 74 % yield, MP = 78-80 °C).

<sup>1</sup>H NMR (500 MHz, CDCl<sub>3</sub>)  $\delta$  8.12 (d, *J* = 7.5 Hz, 2H), 7.63 (t, *J* = 7.5 Hz, 1H), 7.57 (d, *J* = 8.0 Hz, 1H), 7.53 (t, *J* = 7.5 Hz, 2H), 7.08 (td, *J*<sub>1</sub> = 8.0 Hz, *J*<sub>2</sub> = 1.0 Hz, 1H), 7.05 (d, *J* = 6.5 Hz, 1H), 6.98 (td, *J*<sub>1</sub> = 7.5 Hz, *J*<sub>2</sub> = 1.5 Hz, 1H), 6.78 (d, *J* = 7.5 Hz, 1H), 6.75 (d, *J* = 7.5 Hz, 1H), 6.71 (s, 1H), 4.49 (dd, *J*<sub>1</sub> = 18.0 Hz, *J*<sub>2</sub> = 1.0 Hz, 1H), 4.28 (d, *J* = 18.0 Hz, 1H), 3.34 (s, 3H), 3.20 (d, *J* = 16.0 Hz, 1H), 2.35 (s, 3H), 2.32 (d, *J* = 16.5 Hz, 1H), 2.26-2.15 (m, 2H), 1.39-1.32 (m, 2H), 1.31-1.24 (m, 2H), 0.82 (t, *J* = 7.3 Hz, 3H). <sup>13</sup>C NMR (125 MHz, CDCl<sub>3</sub>)  $\delta$  197.6, 180.6, 141.5, 138.0, 137.2, 136.5, 135.0, 135.0, 133.2, 131.5, 128.8, 128.2, 127.6, 127.1, 125.7, 124.3, 124.1, 123.5, 123.5, 109.0, 52.5, 38.6, 37.9, 34.5, 29.4, 26.5, 22.8, 21.8, 13.8. IR (neat, cm<sup>-1</sup>):  $\nu$  3058, 3026, 2955, 2928, 2870, 1711, 1688, 1616, 1467, 1448, 1373, 1326, 1253, 1094, 989, 818, 755, 735, 690. HRMS (ESI): *m/z* calcd for C<sub>31</sub>H<sub>31</sub>NO<sub>2</sub>+Na<sup>+</sup>: 472.2247 [M+Na]<sup>+</sup>; found: 472.2247.

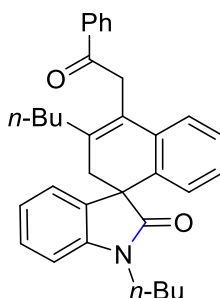

### 1,3'-Dibutyl-4'-(2-oxo-2-phenylethyl)-2'*H*-spiro[indoline-3,1'-naphthalen]-2-one (4ga)

Prepared according to General Procedure 3 using starting material **1g** and (*E*)- $\beta$ -chloroenone **2a**. The crude mixture was purified via silica-gel flash chromatography using 5:1 Pentanes: Et<sub>2</sub>O v:v as the mobile phase. The title compound was obtained as a pale yellow solid (70.5 mg, 0.148 mmol, 74 % yield, MP = 110-112 °C).

<sup>1</sup>H NMR (500 MHz, CDCl<sub>3</sub>)  $\delta$  8.12 (d, *J* = 7.0 Hz, 2H), 7.72 (d, *J* = 7.0 Hz, 1H), 7.63 (t, *J* = 7.3 Hz, 1H), 7.53 (t, *J* = 7.5 Hz, 2H), 7.22 (td, *J*<sub>1</sub> = 7.8 Hz, *J*<sub>2</sub> = 1.0 Hz, 1H), 7.09 (td, *J*<sub>1</sub> = 7.3 Hz, *J*<sub>2</sub> = 1.0 Hz, 1H), 7.05 (d, *J* = 6.5 Hz, 1H), 7.00 (td, *J*<sub>1</sub> = 7.3 Hz, *J*<sub>2</sub> = 1.0 Hz, 1H), 6.95 (td, *J*<sub>1</sub> = 7.5 Hz, *J*<sub>2</sub> = 0.5 Hz, 1H), 6.89 (d, *J* = 7.5 Hz, 1H), 6.76 (dd, *J*<sub>1</sub> = 7.8 Hz, *J*<sub>2</sub> = 1.0 Hz, 1H), 4.50 (dd, *J*<sub>1</sub> = 18.3 Hz, *J*<sub>2</sub> = 1.0 Hz, 1H), 4.30 (d, *J* = 18.0 Hz, 1H), 3.90-3.78 (m, 2H), 3.22 (d, *J* = 16.5 Hz, 1H), 2.32 (d, *J* = 16.5 Hz, 1H), 2.25-2.15 (m, 2H), 1.81-1.74 (m, 2H), 1.51-1.44 (m, 2H), 1.39-1.32 (m, 2H), 1.31-1.23 (m, 2H), 1.01 (t, *J* = 7.5 Hz, 3H), 0.82 (t, *J* = 7.3 Hz, 3H). <sup>13</sup>C NMR (125 MHz, CDCl<sub>3</sub>)  $\delta$  197.6, 180.0, 140.8, 137.0, 136.4, 135.0, 134.8, 134.4, 133.2, 128.8, 128.2, 127.9, 127.7, 127.1, 125.7, 124.5, 124.2, 123.5, 122.7, 108.4, 52.5, 40.1, 38.6, 37.8, 34.5, 29.7, 29.4, 22.8, 20.3, 13.9, 13.8. IR (neat, cm<sup>-1</sup>):  $\nu$  3055, 3027, 2956, 2927, 2869, 1707, 1686, 1607,

1486, 1464, 1447, 1359, 1208, 1098, 991, 931, 749, 689. **HRMS** (ESI):  $m/z$  calcd for  $C_{33}H_{35}NO_2+Na^+$ : 500.2560  $[M+Na]^+$ ; found: 500.2564.

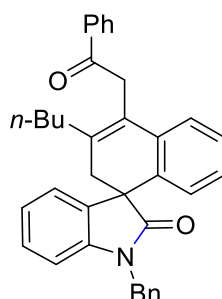

**1-Benzyl-3'-butyl-4'-(2-oxo-2-phenylethyl)-2'H-spiro[indoline-3,1'-naphthalen]-2-one (4ha)**

Prepared according to General Procedure **3** using starting material **1h** and (*E*)- $\beta$ -chloroenone **2a**. The crude mixture was purified via silica-gel flash chromatography using 5:1 Pentanes: Et<sub>2</sub>O v:v as the mobile phase. The title compound was obtained as a pale yellow solid (71.6 mg, 0.14 mmol, 70 % yield, MP = 69-70 °C).

**<sup>1</sup>H NMR** (500 MHz, CDCl<sub>3</sub>)  $\delta$  8.13 (d,  $J$  = 7.5 Hz, 2H), 7.71 (d,  $J$  = 7.0 Hz, 1H), 7.63 (t,  $J$  = 7.5 Hz, 1H), 7.54 (t,  $J$  = 7.8 Hz, 2H), 7.38 (t,  $J$  = 7.3 Hz, 2H), 7.36 (t,  $J$  = 7.5 Hz, 2H), 7.30 (d,  $J$  = 7.0 Hz, 1H), 7.13 (dd,  $J_1$  = 7.5 Hz,  $J_2$  = 1.0 Hz, 1H), 7.10 (dd,  $J_1$  = 6.5 Hz,  $J_2$  = 1.5 Hz, 1H), 7.07 (dd,  $J_1$  = 7.5 Hz,  $J_2$  = 1.0 Hz, 1H), 7.01 (td,  $J_1$  = 7.5 Hz,  $J_2$  = 1.5 Hz, 1H), 6.93 (td,  $J_1$  = 7.5 Hz,  $J_2$  = 0.5 Hz, 1H), 6.81 (dd,  $J_1$  = 7.5 Hz,  $J_2$  = 1.0 Hz, 1H), 6.78 (d,  $J$  = 8.0 Hz, 1H), 5.07 (d,  $J$  = 15.5 Hz, 1H), 5.03 (d,  $J$  = 15.5 Hz, 1H), 4.51 (dd,  $J_1$  = 18.0 Hz,  $J_2$  = 1.5 Hz, 1H), 4.31 (d,  $J$  = 18.0 Hz, 1H), 3.27 (d,  $J$  = 16.5 Hz, 1H), 2.40 (d,  $J$  = 16.5 Hz, 1H), 2.25-2.19 (m, 2H), 1.40-1.32 (m, 2H), 1.31-1.26 (m, 2H), 0.83 (t,  $J$  = 7.0 Hz, 3H). **<sup>13</sup>C NMR** (125 MHz, CDCl<sub>3</sub>)  $\delta$  197.6, 180.3, 140.6, 137.0, 136.4, 136.1, 135.1, 134.7, 134.2, 133.3, 128.8, 128.8, 128.2, 127.9, 127.8, 127.6, 127.4, 127.2, 125.8, 124.5, 124.4, 123.6, 123.0, 109.1, 52.6, 44.0, 38.8, 37.9, 34.5, 29.4, 22.8, 13.9. **IR** (neat, cm<sup>-1</sup>):  $\nu$  3059, 3028, 2955, 2927, 2857, 1712, 1688, 1609, 1597, 1486, 1465, 1448, 1380, 1347, 1210, 1105, 1080, 1001, 940, 755, 692. **HRMS** (ESI):  $m/z$  calcd for  $C_{36}H_{33}NO_2+H^+$ : 512.2584  $[M+H]^+$ ; found: 512.2580.

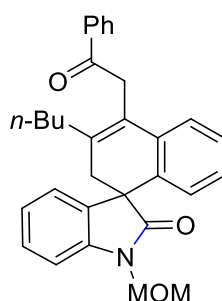

**3'-Butyl-1-(methoxymethyl)-4'-(2-oxo-2-phenylethyl)-2'H-spiro[indoline-3,1'-naphthalen]-2-one (4ia)**

Prepared according to General Procedure **3** using starting material **1i** and (*E*)- $\beta$ -

chloroenone **2a**. The crude mixture was purified via silica-gel flash chromatography using 5:1 Pentanes: Et<sub>2</sub>O v:v as the mobile phase. The title compound was obtained as a yellow solid (74.4 mg, 0.16 mmol, 80 % yield, MP = 58-60 °C).

**<sup>1</sup>H NMR** (500 MHz, CDCl<sub>3</sub>) δ 8.13 (dd, *J*<sub>1</sub> = 8.0 Hz, *J*<sub>2</sub> = 1.5 Hz, 2H), 7.72 (d, *J* = 7.5 Hz, 1H), 7.63 (t, *J* = 7.5 Hz, 1H), 7.54 (t, *J* = 7.5 Hz, 2H), 7.24 (td, *J*<sub>1</sub> = 7.5 Hz, *J*<sub>2</sub> = 1.0 Hz, 1H), 7.11 (td, *J*<sub>1</sub> = 8.0 Hz, *J*<sub>2</sub> = 1.5 Hz, 1H), 7.07 (t, *J* = 7.5 Hz, 2H), 7.01 (t, *J* = 7.5 Hz, 2H), 6.78 (dd, *J*<sub>1</sub> = 7.8 Hz, *J*<sub>2</sub> = 1.0 Hz, 1H), 5.28 (d, *J* = 10.5 Hz, 1H), 5.25 (d, *J* = 11.0 Hz, 1H), 4.50 (dd, *J*<sub>1</sub> = 18.0 Hz, *J*<sub>2</sub> = 1.5 Hz, 1H), 4.31 (d, *J* = 18.0 Hz, 1H), 3.44 (s, 3H), 3.21 (d, *J* = 16.0 Hz, 1H), 2.41 (d, *J* = 16.5 Hz, 1H), 2.26-2.15 (m, 2H), 1.39-1.32 (m, 2H), 1.30-1.24 (m, 2H), 0.82 (t, *J* = 7.3 Hz, 3H). **<sup>13</sup>C NMR** (125 MHz, CDCl<sub>3</sub>) δ 197.6, 180.9, 139.7, 137.0, 136.2, 135.1, 134.4, 133.7, 133.3, 128.8, 128.2, 128.1, 127.9, 127.1, 125.8, 124.6, 124.4, 123.7, 123.5, 109.5, 71.6, 56.4, 53.0, 39.0, 37.9, 34.5, 29.4, 22.8, 13.9. **IR** (neat, cm<sup>-1</sup>): ν 3059, 2930, 2865, 1718, 1685, 1603, 1459, 1340, 1207, 1077, 986, 914, 748, 689. **HRMS** (ESI): *m/z* calcd for C<sub>31</sub>H<sub>31</sub>NO<sub>3</sub>+Na<sup>+</sup>: 488.2196 [M+Na]<sup>+</sup>; found: 488.2200.

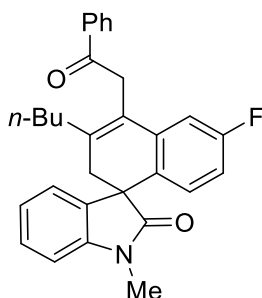

**3'-Butyl-6'-fluoro-1-methyl-4'-(2-oxo-2-phenylethyl)-2'H-spiro[indoline-3,1'-naphthalen]-2-one (4ja)**

Prepared according to General Procedure **3** using starting material **1j** and (*E*)- $\beta$ -chloroenone **2a**. The crude mixture was purified via silica-gel flash chromatography using 5:1 Pentanes: Et<sub>2</sub>O v:v as the mobile phase. The title compound was obtained as a pale yellow solid (39.9 mg, 0.088 mmol, 44 % yield, MP = 125-126 °C).

**<sup>1</sup>H NMR** (500 MHz, CDCl<sub>3</sub>) δ 8.12 (d, *J* = 7.5 Hz, 2H), 7.74 (d, *J* = 7.5 Hz, 1H), 7.64 (t, *J* = 7.5 Hz, 1H), 7.55 (t, *J* = 7.8 Hz, 2H), 7.26 (t, *J* = 7.5 Hz, 1H), 7.00 (t, *J* = 7.5 Hz, 1H), 6.89 (d, *J* = 7.5 Hz, 1H), 6.77-6.71 (m, 2H), 6.69 (td, *J*<sub>1</sub> = 8.5 Hz, *J*<sub>2</sub> = 2.0 Hz, 1H), 4.43 (d, *J* = 18.5 Hz, 1H), 4.30 (d, *J* = 18.5 Hz, 1H), 3.35 (s, 3H), 3.20 (d, *J* = 16.5 Hz, 1H), 2.36 (d, *J* = 16.5 Hz, 1H), 2.26-2.14 (m, 2H), 1.37-1.30 (m, 2H), 1.29-1.22 (m, 2H), 0.81 (t, *J* = 7.3 Hz, 3H). **<sup>13</sup>C NMR** (125 MHz, CDCl<sub>3</sub>) δ 197.3, 180.0, 162.4 (d, *J* = 242.8 Hz), 141.3, 138.1, 137.5 (d, *J* = 7.4 Hz), 136.8, 134.0, 133.4, 130.3, 130.3, 128.9, 128.2, 127.2 (d, *J* = 8.4 Hz), 124.3, 123.8, 123.2, 113.4 (d, *J* = 21.4 Hz), 110.7 (d, *J* = 22.9 Hz), 108.2, 52.1, 38.7, 37.8, 34.5, 29.3, 26.6, 22.7, 13.8. **<sup>19</sup>F NMR** (470 MHz, CDCl<sub>3</sub>): δ -114.48 – -114.54 (m, 1F). **IR** (neat, cm<sup>-1</sup>): ν 3058, 2956, 2930, 2870, 1709, 1686, 1607, 1493, 1471, 1374, 1350, 1216, 1171, 1129, 1091, 988, 908, 862, 759, 692. **HRMS** (ESI): *m/z* calcd for C<sub>30</sub>H<sub>28</sub>FNO<sub>2</sub>+Na<sup>+</sup>: 476.1996 [M+Na]<sup>+</sup>; found: 476.2001.

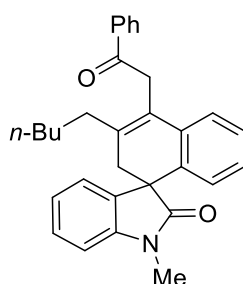

**1-Methyl-4'-(2-oxo-2-phenylethyl)-3'-pentyl-2'*H*-spiro[indoline-3,1'-naphthalen]-2-one (4ab)**

Prepared according to General Procedure **3** using starting material **1a** and (*E*)- $\beta$ -chloroenone **2b**. The crude mixture was purified via silica-gel flash chromatography using 5:1 Pentanes: Et<sub>2</sub>O v:v as the mobile phase. The title compound was obtained as a yellow sticky oil (65.3 mg, 0.145 mmol, 73 % yield).

<sup>1</sup>H NMR (500 MHz, CDCl<sub>3</sub>)  $\delta$  8.13 (d, *J* = 8.0 Hz, 2H), 7.73 (d, *J* = 7.5 Hz, 1H), 7.64 (t, *J* = 7.3 Hz, 1H), 7.54 (t, *J* = 7.8 Hz, 2H), 7.23 (d, *J* = 7.5 Hz, 1H), 7.10 (t, *J* = 7.5 Hz, 1H), 7.06 (d, *J* = 7.5 Hz, 1H), 7.00 (t, *J* = 7.5 Hz, 1H), 6.97 (t, *J* = 7.3 Hz, 1H), 6.89 (d, *J* = 8.0 Hz, 1H), 6.76 (d, *J* = 7.5 Hz, 1H), 4.51 (d, *J* = 18.0 Hz, 1H), 4.30 (d, *J* = 18.0 Hz, 1H), 3.36 (s, 3H), 3.23 (d, *J* = 16.5 Hz, 1H), 2.33 (d, *J* = 16.0 Hz, 1H), 2.26-2.14 (m, 2H), 1.42-1.30 (m, 2H), 1.24-1.19 (m, 4H), 0.80 (t, *J* = 6.8 Hz, 3H). <sup>13</sup>C NMR (125 MHz, CDCl<sub>3</sub>)  $\delta$  197.6, 180.3, 141.3, 137.0, 136.5, 135.0, 134.7, 134.3, 133.3, 128.8, 128.2, 128.0, 127.8, 127.1, 125.8, 124.4, 124.3, 123.5, 123.1, 108.1, 52.7, 38.6, 37.8, 34.7, 31.8, 27.0, 26.6, 22.4, 13.9. IR (neat, cm<sup>-1</sup>):  $\nu$  3058, 3025, 2954, 2927, 2857, 1707, 1687, 1608, 1490, 1469, 1448, 1373, 1349, 1254, 1211, 1128, 1090, 988, 908, 753, 730, 690. HRMS (ESI): *m/z* calcd for C<sub>31</sub>H<sub>31</sub>NO<sub>2</sub>+Na<sup>+</sup>: 472.2247 [M+Na]<sup>+</sup>; found: 472.2255.

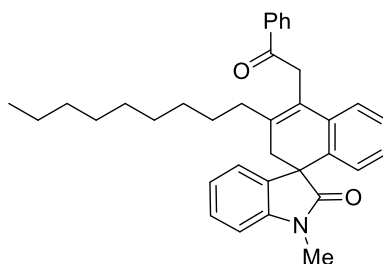

**1-Methyl-3'-nonyl-4'-(2-oxo-2-phenylethyl)-2'*H*-spiro[indoline-3,1'-naphthalen]-2-one (4ac)**

Prepared according to General Procedure **3** using starting material **1a** and (*E*)- $\beta$ -chloroenone **2c**. The crude mixture was purified via silica-gel flash chromatography using 5:1 Pentanes: Et<sub>2</sub>O v:v as the mobile phase. The title compound was obtained as a yellow oil (57.3 mg, 0.113 mmol, 57 % yield).

<sup>1</sup>H NMR (500 MHz, CDCl<sub>3</sub>)  $\delta$  8.13 (dd, *J*<sub>1</sub> = 8.5 Hz, *J*<sub>2</sub> = 1.0 Hz, 2H), 7.74 (d, *J* = 7.5 Hz, 1H), 7.64 (t, *J* = 7.3 Hz, 1H), 7.54 (t, *J* = 7.8 Hz, 2H), 7.23 (dd, *J*<sub>1</sub> = 7.5 Hz, *J*<sub>2</sub> = 1.0 Hz, 1H), 7.10 (td, *J*<sub>1</sub> = 7.5 Hz, *J*<sub>2</sub> = 1.5 Hz, 1H), 7.06 (dd, *J*<sub>1</sub> = 7.8 Hz, *J*<sub>2</sub> = 1.5 Hz,

1H), 7.00 (td,  $J_1 = 7.5$  Hz,  $J_2 = 1.0$  Hz, 1H), 6.97 (td,  $J_1 = 7.5$  Hz,  $J_2 = 1.0$  Hz, 1H), 6.89 (d,  $J = 7.5$  Hz, 1H), 6.76 (dd,  $J_1 = 7.5$  Hz,  $J_2 = 1.0$  Hz, 1H), 4.51 (dd,  $J_1 = 18.5$  Hz,  $J_2 = 1.5$  Hz, 1H), 4.30 (d,  $J = 18.0$  Hz, 1H), 3.36 (s, 3H), 3.23 (d,  $J = 16.5$  Hz, 1H), 2.33 (d,  $J = 16.0$  Hz, 1H), 2.26-2.13 (m, 2H), 1.40-1.31 (m, 2H), 1.25-1.20 (m, 4H), 1.18 (s, 8H), 0.85 (t,  $J = 7.3$  Hz, 3H).  $^{13}\text{C}$  NMR (125 MHz,  $\text{CDCl}_3$ )  $\delta$  197.6, 180.3, 141.3, 137.0, 136.5, 135.0, 134.7, 134.3, 133.3, 128.8, 128.2, 128.0, 127.8, 127.1, 125.7, 124.4, 124.3, 123.5, 123.1, 108.1, 52.7, 38.6, 37.8, 34.7, 31.8, 29.6, 29.5, 29.4, 29.3, 27.3, 26.6, 22.6, 14.1. IR (neat,  $\text{cm}^{-1}$ ):  $\nu$  3058, 2922, 2852, 1711, 1689, 1609, 1469, 1372, 1348, 1253, 1211, 1091, 1024, 1000, 750, 689. HRMS (ESI):  $m/z$  calcd for  $\text{C}_{35}\text{H}_{39}\text{NO}_2 + \text{Na}^+$ : 528.2873  $[\text{M} + \text{Na}]^+$ ; found: 528.2886.

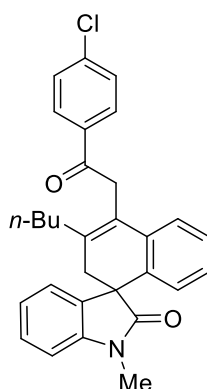

**3'-Butyl-4'-(2-(4-chlorophenyl)-2-oxoethyl)-1-methyl-2'H-spiro[indoline-3,1'-naphthalen]-2-one (4ad)**

Prepared according to General Procedure 3 using starting material 1a and (*E*)- $\beta$ -chloroone 2d. The crude mixture was purified via silica-gel flash chromatography using 5:1 Pentanes:  $\text{Et}_2\text{O}$  v:v as the mobile phase. The title compound was obtained as a pale yellow solid (54.5 mg, 0.116 mmol, 58 % yield, MP = 87-89 °C).

$^1\text{H}$  NMR (500 MHz,  $\text{CDCl}_3$ )  $\delta$  8.06 (d,  $J = 8.5$  Hz, 2H), 7.70 (d,  $J = 7.0$  Hz, 1H), 7.51 (d,  $J = 8.5$  Hz, 2H), 7.24 (dd,  $J_1 = 8.0$  Hz,  $J_2 = 1.0$  Hz, 1H), 7.10 (td,  $J_1 = 7.8$  Hz,  $J_2 = 1.0$  Hz, 1H), 7.02 (d,  $J = 8.0$  Hz, 1H), 7.01 (d,  $J = 7.5$  Hz, 1H), 6.97 (t,  $J = 7.5$  Hz, 1H), 6.89 (d,  $J = 8.0$  Hz, 1H), 6.76 (d,  $J = 7.5$  Hz, 1H), 4.46 (dd,  $J_1 = 18.0$  Hz,  $J_2 = 1.5$  Hz, 1H), 4.25 (d,  $J = 18.0$  Hz, 1H), 3.36 (s, 3H), 3.22 (d,  $J = 16.5$  Hz, 1H), 2.34 (d,  $J = 16.5$  Hz, 1H), 2.26-2.21 (m, 1H), 2.19-2.14 (m, 1H), 1.37-1.31 (m, 2H), 1.30-1.26 (m, 1H), 1.25-1.22 (m, 1H), 0.82 (t,  $J = 7.0$  Hz, 3H).  $^{13}\text{C}$  NMR (125 MHz,  $\text{CDCl}_3$ )  $\delta$  196.5, 180.2, 141.4, 139.8, 136.6, 135.3, 134.9, 134.7, 134.2, 129.6, 129.1, 128.0, 127.8, 127.2, 125.8, 124.3, 124.0, 123.4, 123.0, 108.1, 52.6, 38.5, 37.8, 34.5, 29.4, 26.6, 22.7, 13.9. IR (neat,  $\text{cm}^{-1}$ ):  $\nu$  3058, 3023, 2955, 2927, 2858, 1707, 1687, 1608, 1587, 1489, 1468, 1372, 1348, 1208, 1089, 988, 908, 811, 749, 730, 693. HRMS (ESI):  $m/z$  calcd for  $\text{C}_{30}\text{H}_{28}\text{ClNO}_2 + \text{H}^+$ : 470.1881  $[\text{M} + \text{H}]^+$ ; found: 470.1876.



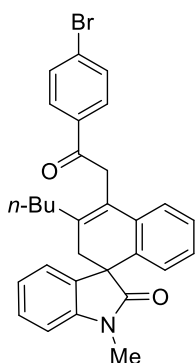

**4'-(2-(4-Bromophenyl)-2-oxoethyl)-3'-butyl-1-methyl-2'H-spiro[indoline-3,1'-naphthalen]-2-one (4ae)**

Prepared according to General Procedure **3** using starting material **1a** and (*E*)- $\beta$ -chloroenone **2e**. The crude mixture was purified via silica-gel flash chromatography using 5:1 Pentanes: Et<sub>2</sub>O v:v as the mobile phase. The title compound was obtained as a yellow solid (35.9 mg, 0.07 mmol, 35 % yield, MP = 88-90 °C).

<sup>1</sup>H NMR (500 MHz, CDCl<sub>3</sub>)  $\delta$  7.99 (d, *J* = 8.5 Hz, 2H), 7.69 (d, *J* = 7.5 Hz, 1H), 7.68 (d, *J* = 8.5 Hz, 2H), 7.25 (td, *J*<sub>1</sub> = 8.0 Hz, *J*<sub>2</sub> = 1.0 Hz, 1H), 7.10 (td, *J*<sub>1</sub> = 7.5 Hz, *J*<sub>2</sub> = 1.0 Hz, 1H), 7.01 (d, *J* = 8.5 Hz, 2H), 6.97 (td, *J*<sub>1</sub> = 7.5 Hz, *J*<sub>2</sub> = 1.0 Hz, 1H), 6.89 (d, *J* = 7.5 Hz, 1H), 6.76 (d, *J* = 8.0 Hz, 1H), 4.46 (dd, *J*<sub>1</sub> = 18.0 Hz, *J*<sub>2</sub> = 1.5 Hz, 1H), 4.25 (d, *J* = 18.0 Hz, 1H), 3.36 (s, 3H), 3.21 (d, *J* = 16.0 Hz, 1H), 2.34 (d, *J* = 16.5 Hz, 1H), 2.27-2.21 (m, 1H), 2.19-2.13 (m, 1H), 1.37-1.31 (m, 2H), 1.30-1.27 (m, 1H), 1.25-1.22 (m, 1H), 0.82 (t, *J* = 7.3 Hz, 3H). <sup>13</sup>C NMR (125 MHz, CDCl<sub>3</sub>)  $\delta$  196.7, 180.2, 141.4, 136.6, 135.7, 134.9, 134.7, 134.2, 132.1, 129.7, 128.5, 128.0, 127.8, 127.2, 125.8, 124.3, 124.0, 123.4, 123.0, 108.1, 52.6, 38.5, 37.8, 34.5, 29.4, 26.6, 22.7, 13.9. IR (neat, cm<sup>-1</sup>):  $\nu$  3059, 3025, 2956, 2921, 2851, 1709, 1688, 1606, 1584, 1491, 1468, 1372, 1346, 1255, 1208, 1070, 988, 808, 749, 694. HRMS (ESI): *m/z* calcd for C<sub>30</sub>H<sub>28</sub>BrNO<sub>2</sub>+H<sup>+</sup>: 514.1376 [M+H]<sup>+</sup>; found: 514.1389.

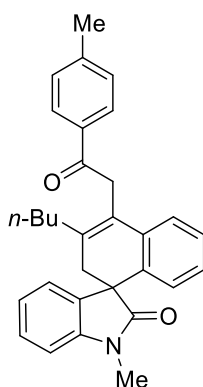

**3'-Butyl-1-methyl-4'-(2-oxo-2-(p-tolyl)ethyl)-2'H-spiro[indoline-3,1'-naphthalen]-2-one (4af)**

Prepared according to General Procedure **3** using starting material **1a** and (*E*)- $\beta$ -chloroenone **2f**. The crude mixture was purified via silica-gel flash chromatography using 5:1 Pentanes: Et<sub>2</sub>O v:v as the mobile phase. The title compound was obtained as

a pale yellow solid (55.7 mg, 0.124 mmol, 62 % yield, MP = 145-147 °C).

**<sup>1</sup>H NMR** (500 MHz, CDCl<sub>3</sub>) δ 8.03 (d, *J* = 8.0 Hz, 2H), 7.76 (d, *J* = 7.0 Hz, 1H), 7.33 (d, *J* = 8.0 Hz, 2H), 7.24 (t, *J* = 7.8 Hz, 1H), 7.08 (t, *J* = 7.5 Hz, 1H), 7.05 (d, *J* = 7.0 Hz, 1H), 7.00 (d, *J* = 6.5 Hz, 1H), 6.97 (d, *J* = 7.0 Hz, 1H), 6.89 (d, *J* = 7.5 Hz, 1H), 6.76 (d, *J* = 7.5 Hz, 1H), 4.49 (d, *J* = 18.0 Hz, 1H), 4.26 (d, *J* = 18.0 Hz, 1H), 3.36 (s, 3H), 3.22 (d, *J* = 16.0 Hz, 1H), 2.45 (s, 3H), 2.33 (d, *J* = 16.5 Hz, 1H), 2.27-2.21 (m, 1H), 2.20-2.14 (m, 1H), 1.38-1.31 (m, 2H), 1.29-1.22 (m, 2H), 0.81 (t, *J* = 7.0 Hz, 3H). **<sup>13</sup>C NMR** (125 MHz, CDCl<sub>3</sub>) δ 197.3, 180.4, 144.1, 141.3, 136.3, 135.1, 134.6, 134.5, 134.3, 129.5, 128.3, 128.0, 127.7, 127.1, 125.7, 124.5, 124.4, 123.6, 123.1, 108.1, 52.7, 38.5, 37.7, 34.5, 29.4, 26.6, 22.7, 21.7, 13.9. **IR** (neat, cm<sup>-1</sup>): ν 3054, 2957, 2922, 2855, 1704, 1683, 1605, 1491, 1467, 1373, 1349, 1254, 1203, 1172, 1090, 1025, 981, 812, 746. **HRMS** (ESI): *m/z* calcd for C<sub>31</sub>H<sub>31</sub>NO<sub>2</sub>+H<sup>+</sup>: 450.2428 [M+H]<sup>+</sup>; found: 450.2424.

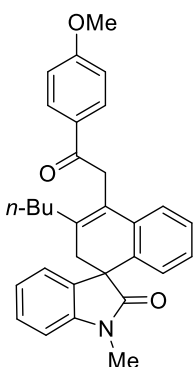

**3'-Butyl-4'-(2-(4-methoxyphenyl)-2-oxoethyl)-1-methyl-2'*H*-spiro[indoline-3,1'-naphthalen]-2-one (4ag)**

Prepared according to General Procedure 3 using starting material 1a and (*E*)-β-chloroenone 2g. The crude mixture was purified via silica-gel flash chromatography using 3:1 Pentanes: Et<sub>2</sub>O v:v as the mobile phase. The title compound was obtained as a yellow solid (47.6 mg, 0.102 mmol, 51 % yield, MP = 131-132 °C).

**<sup>1</sup>H NMR** (500 MHz, CDCl<sub>3</sub>) δ 8.12 (d, *J* = 8.5 Hz, 2H), 7.76 (d, *J* = 7.5 Hz, 1H), 7.23 (d, *J* = 8.0 Hz, 1H), 7.09 (t, *J* = 8.0 Hz, 1H), 7.06 (d, *J* = 7.5 Hz, 1H), 7.01 (d, *J* = 9.0 Hz, 2H), 6.98 (t, *J* = 7.5 Hz, 2H), 6.89 (d, *J* = 7.5 Hz, 1H), 6.75 (d, *J* = 7.5 Hz, 1H), 4.46 (d, *J* = 18.0 Hz, 1H), 4.23 (d, *J* = 18.0 Hz, 1H), 3.91 (s, 3H), 3.36 (s, 3H), 3.22 (d, *J* = 16.5 Hz, 1H), 2.33 (d, *J* = 16.5 Hz, 1H), 2.26-2.17 (m, 2H), 1.41-1.34 (m, 2H), 1.31-1.22 (m, 2H), 0.82 (t, *J* = 7.3 Hz, 3H). **<sup>13</sup>C NMR** (125 MHz, CDCl<sub>3</sub>) δ 196.2, 180.4, 163.6, 141.3, 136.2, 135.1, 134.7, 134.3, 130.5, 130.1, 128.0, 127.7, 127.1, 125.7, 124.6, 124.5, 123.6, 123.1, 113.9, 108.1, 55.5, 52.7, 38.6, 37.4, 34.5, 29.4, 26.6, 22.8, 13.9. **IR** (neat, cm<sup>-1</sup>): ν 3060, 2955, 2919, 2850, 1709, 1678, 1598, 1494, 1465, 1373, 1346, 1250, 1168, 1024, 832, 750, 698. **HRMS** (ESI): *m/z* calcd for C<sub>31</sub>H<sub>31</sub>NO<sub>3</sub>+H<sup>+</sup>: 466.2377 [M+H]<sup>+</sup>; found: 466.2390.

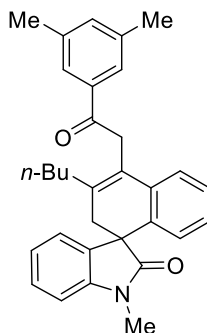

**3'-Butyl-4'-(2-(3,5-dimethylphenyl)-2-oxoethyl)-1-methyl-2'*H*-spiro[indoline-3,1'-naphthalen]-2-one (4ah)**

Prepared according to General Procedure 3 using starting material 1a and (*E*)- $\beta$ -chloroenone 2h. The crude mixture was purified via silica-gel flash chromatography using 5:1 Pentanes: Et<sub>2</sub>O v:v as the mobile phase. The title compound was obtained as a yellow solid (50.3 mg, 0.108 mmol, 54 % yield, MP = 148-150 °C).

<sup>1</sup>H NMR (500 MHz, CDCl<sub>3</sub>)  $\delta$  7.74 (d,  $J$  = 8.0 Hz, 1H), 7.73 (s, 2H), 7.27 (s, 1H), 7.23 (dd,  $J_1$  = 8.0 Hz,  $J_2$  = 1.0 Hz, 1H), 7.09 (td,  $J_1$  = 8.0 Hz,  $J_2$  = 1.0 Hz, 1H), 7.06 (d,  $J$  = 8.0 Hz, 1H), 6.99 (td,  $J_1$  = 7.5 Hz,  $J_2$  = 1.5 Hz, 1H), 6.97 (td,  $J_1$  = 7.5 Hz,  $J_2$  = 1.0 Hz, 1H), 6.89 (d,  $J$  = 7.5 Hz, 1H), 6.76 (d,  $J$  = 7.5 Hz, 1H), 4.49 (dd,  $J_1$  = 18.0 Hz,  $J_2$  = 1.0 Hz, 1H), 4.26 (d,  $J$  = 18.0 Hz, 1H), 3.36 (s, 3H), 3.23 (d,  $J$  = 16.0 Hz, 1H), 2.42 (s, 6H), 2.32 (d,  $J$  = 16.5 Hz, 1H), 2.27-2.21 (m, 1H), 2.20-2.14 (m, 1H), 1.38-1.31 (m, 2H), 1.30-1.27 (m, 1H), 1.25-1.19 (m, 1H), 0.82 (t,  $J$  = 7.0 Hz, 3H). <sup>13</sup>C NMR (125 MHz, CDCl<sub>3</sub>)  $\delta$  198.0, 180.4, 141.3, 138.4, 137.1, 136.3, 135.0, 134.9, 134.7, 134.3, 127.9, 127.7, 127.1, 126.0, 125.7, 124.4, 124.4, 123.6, 123.1, 108.1, 52.7, 38.5, 38.0, 34.5, 29.4, 26.6, 22.8, 21.3, 13.9. IR (neat, cm<sup>-1</sup>):  $\nu$  3054, 3029, 2955, 2925, 2858, 1703, 1680, 1607, 1490, 1467, 1373, 1348, 1330, 1254, 1184, 1156, 1090, 910, 851, 749, 730, 686. HRMS (ESI):  $m/z$  calcd for C<sub>32</sub>H<sub>33</sub>NO<sub>2</sub>+H<sup>+</sup>: 464.2584 [M+H]<sup>+</sup>; found 464.2600.

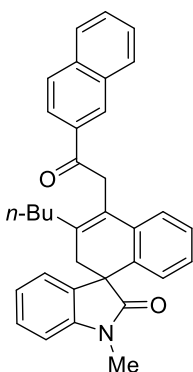

**3'-Butyl-1-methyl-4'-(2-(naphthalen-2-yl)-2-oxoethyl)-2'*H*-spiro[indoline-3,1'-naphthalen]-2-one (4ai)**

Prepared according to General Procedure 3 using starting material 1a and (*E*)- $\beta$ -chloroenone 2i. The crude mixture was purified via silica-gel flash chromatography using 5:1 Pentanes: Et<sub>2</sub>O v:v as the mobile phase. The title compound was obtained as a yellow solid (86.8 mg, 0.178 mmol, 89 % yield, MP = 129-131 °C).

**<sup>1</sup>H NMR** (500 MHz, CDCl<sub>3</sub>) δ 8.69 (s, 1H), 8.15 (dd,  $J_1 = 8.5$  Hz,  $J_2 = 1.5$  Hz, 1H), 8.03 (d,  $J = 8.0$  Hz, 1H), 7.97 (d,  $J = 8.5$  Hz, 1H), 7.93 (d,  $J = 8.5$  Hz, 1H), 7.75 (d,  $J = 7.0$  Hz, 1H), 7.64 (td,  $J_1 = 8.0$  Hz,  $J_2 = 1.0$  Hz, 1H), 7.60 (td,  $J_1 = 7.0$  Hz,  $J_2 = 1.0$  Hz, 1H), 7.23 (dd,  $J_1 = 7.8$  Hz,  $J_2 = 1.0$  Hz, 1H), 7.11 (dd,  $J_1 = 7.5$  Hz,  $J_2 = 1.0$  Hz, 1H), 7.09 (dd,  $J_1 = 7.0$  Hz,  $J_2 = 1.0$  Hz, 1H), 7.00 (td,  $J_1 = 7.5$  Hz,  $J_2 = 1.0$  Hz, 1H), 6.92 (td,  $J_1 = 7.5$  Hz,  $J_2 = 1.0$  Hz, 1H), 6.89 (d,  $J = 7.5$  Hz, 1H), 6.77 (d,  $J = 7.5$  Hz, 1H), 4.66 (dd,  $J_1 = 18.0$  Hz,  $J_2 = 1.0$  Hz, 1H), 4.43 (d,  $J = 17.5$  Hz, 1H), 3.37 (s, 3H), 3.26 (d,  $J = 16.0$  Hz, 1H), 2.35 (d,  $J = 16.5$  Hz, 1H), 2.31-2.27 (m, 1H), 2.25-2.20 (m, 1H), 1.42-1.34 (m, 2H), 1.32-1.24 (m, 2H), 0.82 (t,  $J = 7.0$  Hz, 3H). **<sup>13</sup>C NMR** (125 MHz, CDCl<sub>3</sub>) δ 197.7, 180.3, 141.3, 136.5, 135.7, 135.0, 134.7, 134.3, 134.3, 132.6, 129.7, 129.6, 128.7, 128.6, 128.0, 127.8, 127.8, 127.1, 126.9, 125.8, 124.4, 124.4, 124.0, 123.6, 123.0, 108.1, 52.7, 38.6, 37.9, 34.6, 29.5, 26.6, 22.8, 13.9. **IR** (neat, cm<sup>-1</sup>): ν 3059, 3025, 2955, 2928, 2870, 1706, 1681, 1608, 1490, 1468, 1372, 1350, 1252, 1182, 1124, 822, 727, 698. **HRMS** (ESI):  $m/z$  calcd for C<sub>34</sub>H<sub>31</sub>NO<sub>2</sub>+H<sup>+</sup>: 486.2428 [M+H]<sup>+</sup>; found: 486.2442.

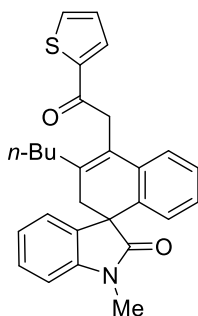

**3'-Butyl-1-methyl-4'-(2-oxo-2-(thiophen-2-yl)ethyl)-2'*H*-spiro[indoline-3,1'-naphthalen]-2-one (4aj)**

Prepared according to General Procedure **3** using starting material **1a** and (*E*)-β-chloroenone **2j**. The crude mixture was purified via silica-gel flash chromatography using 5:1 Pentanes: Et<sub>2</sub>O v:v as the mobile phase. The title compound was obtained as a pale yellow solid (65.4 mg, 0.148 mmol, 74 % yield, MP = 149-151 °C).

**<sup>1</sup>H NMR** (500 MHz, CDCl<sub>3</sub>) δ 7.95 (dd,  $J_1 = 3.5$  Hz,  $J_2 = 1.0$  Hz, 1H), 7.72 (d,  $J = 7.5$  Hz, 1H), 7.69 (dd,  $J_1 = 5.0$  Hz,  $J_2 = 1.0$  Hz, 1H), 7.24 (td,  $J_1 = 8.5$  Hz,  $J_2 = 1.5$  Hz, 1H), 7.21 (dd,  $J_1 = 5.0$  Hz,  $J_2 = 3.5$  Hz, 1H), 7.14 (dd,  $J_1 = 7.5$  Hz,  $J_2 = 1.0$  Hz, 1H), 7.11 (td,  $J_1 = 8.0$  Hz,  $J_2 = 1.0$  Hz, 1H), 7.00 (td,  $J_1 = 7.5$  Hz,  $J_2 = 1.5$  Hz, 1H), 6.98 (td,  $J_1 = 7.5$  Hz,  $J_2 = 1.0$  Hz, 1H), 6.88 (d,  $J = 8.0$  Hz, 1H), 6.76 (dd,  $J_1 = 7.5$  Hz,  $J_2 = 1.0$  Hz, 1H), 4.45 (dd,  $J_1 = 18.0$  Hz,  $J_2 = 1.5$  Hz, 1H), 4.23 (d,  $J = 18.0$  Hz, 1H), 3.36 (s, 3H), 3.22 (d,  $J = 16.5$  Hz, 1H), 2.33 (d,  $J = 16.5$  Hz, 1H), 2.28-2.17 (m, 2H), 1.40-1.32 (m, 2H), 1.31-1.24 (m, 2H), 0.82 (t,  $J = 7.3$  Hz, 3H). **<sup>13</sup>C NMR** (125 MHz, CDCl<sub>3</sub>) δ 190.5, 180.3, 144.0, 141.3, 136.9, 134.9, 134.7, 134.2, 133.8, 131.9, 128.3, 128.0, 127.8, 127.2, 125.8, 124.4, 123.9, 123.5, 123.1, 108.1, 52.7, 38.5, 38.5, 34.5, 29.4, 26.6, 22.8, 13.9. **IR** (neat, cm<sup>-1</sup>): ν 3051, 3019, 2953, 2927, 2856, 1701, 1655, 1608, 1474, 1417, 1372, 1351, 1222, 1130, 1089, 925, 755, 732, 687. **HRMS** (ESI):  $m/z$  calcd for C<sub>28</sub>H<sub>27</sub>NO<sub>2</sub>S+Na<sup>+</sup>: 464.1655 [M+Na]<sup>+</sup>; found: 464.1665.

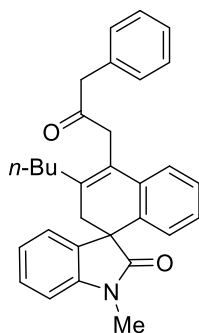

**3'-Butyl-1-methyl-4'-(2-oxo-3-phenylpropyl)-2'*H*-spiro[indoline-3,1'-naphthalen]-2-one (4ak)**

Prepared according to General Procedure **3** using starting material **1a** and (*E*)- $\beta$ -chloroenone **2k**. The crude mixture was purified via silica-gel flash chromatography using 5:1 Pentanes: Et<sub>2</sub>O v:v as the mobile phase. The title compound was obtained as a yellow sticky oil (39.2 mg, 0.087 mmol, 44 % yield).

**<sup>1</sup>H NMR** (500 MHz, CDCl<sub>3</sub>)  $\delta$  7.55 (d,  $J$  = 7.5 Hz, 1H), 7.36 (t,  $J$  = 7.3 Hz, 2H), 7.31 (d,  $J$  = 7.5 Hz, 1H), 7.29 (d,  $J$  = 8.5 Hz, 2H), 7.23 (dd,  $J_1$  = 7.8 Hz,  $J_2$  = 1.0 Hz, 1H), 7.07 (td,  $J_1$  = 7.5 Hz,  $J_2$  = 1.0 Hz, 1H), 7.00 (dd,  $J_1$  = 7.5 Hz,  $J_2$  = 1.0 Hz, 1H), 6.93 (td,  $J_1$  = 7.5 Hz,  $J_2$  = 0.5 Hz, 1H), 6.90 (d,  $J$  = 8.5 Hz, 1H), 6.88 (d,  $J$  = 8.0 Hz, 1H), 6.71 (dd,  $J_1$  = 7.5 Hz,  $J_2$  = 1.0 Hz, 1H), 3.91 (dd,  $J_1$  = 18.5 Hz,  $J_2$  = 1.5 Hz, 1H), 3.88 (s, 2H), 3.73 (d,  $J$  = 18.0 Hz, 1H), 3.32 (s, 3H), 3.08 (d,  $J$  = 16.5 Hz, 1H), 2.34 (d,  $J$  = 16.5 Hz, 1H), 2.15-2.08 (m, 1H), 2.07-2.01 (m, 1H), 1.37-1.19 (m, 4H), 0.81 (t,  $J$  = 7.0 Hz, 3H). **<sup>13</sup>C NMR** (125 MHz, CDCl<sub>3</sub>)  $\delta$  206.3, 179.9, 141.6, 136.5, 134.9, 134.6, 134.3, 134.1, 129.5, 128.8, 128.6, 128.1, 127.8, 127.2, 125.8, 124.1, 123.9, 123.5, 123.0, 108.1, 52.4, 49.8, 41.5, 38.4, 34.3, 29.3, 26.5, 22.7, 13.8. **IR** (neat, cm<sup>-1</sup>):  $\nu$  3058, 3027, 2953, 2924, 2856, 1707, 1609, 1491, 1469, 1372, 1347, 1252, 1170, 1089, 1024, 953, 869, 748, 699. **HRMS** (ESI):  $m/z$  calcd for C<sub>31</sub>H<sub>31</sub>NO<sub>2</sub>+Na<sup>+</sup>: 472.2247 [M+Na]<sup>+</sup>; found: 472.2257.

## 7) Synthesis of 3,3-disubstituted furan-containing oxindoles

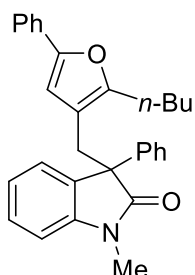

### 3-((2-Butyl-5-phenylfuran-3-yl)methyl)-1-methyl-3-phenylindolin-2-one (5aa)

Prepared according to General Procedure 4 using starting material **1a** and (*E*)- $\beta$ -chloroenone **2a**. The crude mixture was purified via silica-gel flash chromatography using 15:1 Pentanes: Et<sub>2</sub>O v:v as the mobile phase. The title compound was obtained as a yellow solid (60.9 mg, 0.14 mmol, 70 % yield, MP = 77-78 °C).

**<sup>1</sup>H NMR** (400 MHz, CDCl<sub>3</sub>)  $\delta$  7.51 (d, *J* = 6.8 Hz, 2H), 7.41 (d, *J* = 7.2 Hz, 2H), 7.34 (t, *J* = 8.0 Hz, 2H), 7.31-7.24 (m, 4H), 7.22 (d, *J* = 7.2 Hz, 1H), 7.15 (t, *J* = 7.4 Hz, 1H), 7.08 (t, *J* = 7.6 Hz, 1H), 6.73 (d, *J* = 8.0 Hz, 1H), 5.86 (s, 1H), 3.42 (d, *J* = 13.6 Hz, 1H), 3.28 (d, *J* = 13.6 Hz, 1H), 3.07 (s, 3H), 2.46-2.30 (m, 2H), 1.54-1.45 (m, 1H), 1.42-1.32 (m, 1H), 1.33-1.26 (m, 2H), 0.89 (t, *J* = 7.4 Hz, 3H). **<sup>13</sup>C NMR** (100 MHz, CDCl<sub>3</sub>)  $\delta$  178.1, 153.7, 150.5, 144.1, 139.7, 131.6, 131.1, 128.6, 128.5, 128.3, 127.4, 127.2, 126.5, 125.2, 123.1, 122.2, 115.0, 108.2, 107.0, 57.1, 33.7, 30.5, 26.2, 25.7, 22.5, 13.9. **IR** (neat, cm<sup>-1</sup>): 3057, 3032, 2956, 2929, 2871, 1713, 1612, 1494, 1470, 1374, 1349, 1254, 1186, 1081, 932, 813, 759, 732, 694. **HRMS** (DART): *m/z* calcd for C<sub>30</sub>H<sub>29</sub>NO<sub>2</sub>+H<sup>+</sup>: 436.2271 [M+H]<sup>+</sup>; found: 436.2273.

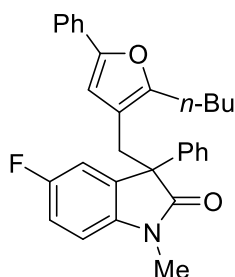

### 3-((2-Butyl-5-phenylfuran-3-yl)methyl)-5-fluoro-1-methyl-3-phenylindolin-2-one (5ba)

Prepared according to General Procedure 4 using starting material **1b** and (*E*)- $\beta$ -chloroenone **2a**. The crude mixture was purified via silica-gel flash chromatography using 15:1 Pentanes: Et<sub>2</sub>O v:v as the mobile phase. The title compound was obtained as a yellow solid (61.6 mg, 0.136 mmol, 68 % yield, MP = 111-113 °C).

**<sup>1</sup>H NMR** (500 MHz, CDCl<sub>3</sub>)  $\delta$  7.47 (d, *J* = 7.5 Hz, 2H), 7.43 (d, *J* = 8.0 Hz, 2H), 7.35 (t, *J* = 7.5 Hz, 2H), 7.30 (d, *J* = 6.5 Hz, 1H), 7.28 (d, *J* = 7.5 Hz, 2H), 7.15 (t, *J* = 7.5 Hz, 1H), 6.99-6.94 (m, 2H), 6.64 (dd, *J*<sub>1</sub> = 9.0 Hz, *J*<sub>2</sub> = 4.0 Hz, 1H), 5.93 (s, 1H), 3.43 (d, *J* = 13.5 Hz, 1H), 3.27 (d, *J* = 13.5 Hz, 1H), 3.06 (s, 3H), 2.47-2.33 (m, 2H), 1.56-

1.47 (m, 1H), 1.42-1.35 (m, 1H), 1.34-1.28 (m, 2H), 0.90 (t,  $J = 7.3$  Hz, 3H).  $^{13}\text{C}$  NMR (125 MHz,  $\text{CDCl}_3$ )  $\delta$  177.8, 159.0 (d,  $J = 239.1$  Hz), 153.7, 150.8, 140.0 (d,  $J = 1.6$  Hz), 139.1, 133.4 (d,  $J = 7.9$  Hz), 131.0, 128.7, 128.5, 127.7, 127.0, 126.7, 123.1, 114.7, 114.5 (d,  $J = 23.4$  Hz), 113.2 (d,  $J = 24.5$  Hz), 108.7 (d,  $J = 8.1$  Hz), 106.8, 57.6, 33.6, 30.5, 26.4, 25.7, 22.5, 13.8.  $^{19}\text{F}$  NMR (470 MHz,  $\text{CDCl}_3$ ):  $\delta$  -120.66 (s, 1F). IR (neat,  $\text{cm}^{-1}$ ):  $\nu$  3056, 3030, 2958, 2931, 2871, 1707, 1600, 1491, 1445, 1351, 1271, 1257, 1143, 1101, 1036, 932, 892, 806, 762, 696. HRMS (ESI):  $m/z$  calcd for  $\text{C}_{30}\text{H}_{28}\text{FNO}_2 + \text{Na}^+$ : 476.1996  $[\text{M} + \text{Na}]^+$ ; found 476.1983.

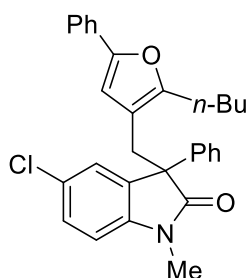

**3-((2-Butyl-5-phenylfuran-3-yl)methyl)-5-chloro-1-methyl-3-phenylindolin-2-one (5ca)**

Prepared according to General Procedure 4 using starting material **1c** and (*E*)- $\beta$ -chloroenone **2a**. The crude mixture was purified via silica-gel flash chromatography using 15:1 Pentanes:  $\text{Et}_2\text{O}$  v:v as the mobile phase. The title compound was obtained as a yellow sticky oil (66.6 mg, 0.142 mmol, 71 % yield).

$^1\text{H}$  NMR (500 MHz,  $\text{CDCl}_3$ )  $\delta$  7.46 (d,  $J = 8.0$  Hz, 2H), 7.44 (d,  $J = 7.5$  Hz, 2H), 7.36 (t,  $J = 7.5$  Hz, 2H), 7.31 (d,  $J = 7.0$  Hz, 1H), 7.30 (t,  $J = 8.0$  Hz, 2H), 7.23 (d,  $J = 2.0$  Hz, 1H), 7.19 (d,  $J = 2.0$  Hz, 1H), 7.17 (t,  $J = 7.5$  Hz, 1H), 6.65 (d,  $J = 8.5$  Hz, 1H), 5.96 (s, 1H), 3.44 (d,  $J = 14.0$  Hz, 1H), 3.26 (d,  $J = 14.0$  Hz, 1H), 3.07 (s, 3H), 2.46-2.39 (m, 1H), 2.38-2.32 (m, 1H), 1.55-1.48 (m, 1H), 1.43-1.36 (m, 1H), 1.35-1.29 (m, 2H), 0.91 (t,  $J = 7.3$  Hz, 3H).  $^{13}\text{C}$  NMR (125 MHz,  $\text{CDCl}_3$ )  $\delta$  177.7, 153.7, 150.8, 142.6, 139.0, 133.5, 131.0, 128.7, 128.5, 128.2, 127.7, 127.7, 127.0, 126.7, 125.5, 123.1, 114.6, 109.1, 106.7, 57.4, 33.6, 30.5, 26.4, 25.7, 22.5, 13.9. IR (neat,  $\text{cm}^{-1}$ ):  $\nu$  3059, 3031, 2957, 2930, 2871, 1711, 1601, 1489, 1348, 1271, 1098, 1072, 908, 808, 761, 729, 694. HRMS (ESI):  $m/z$  calcd for  $\text{C}_{30}\text{H}_{28}\text{ClNO}_2 + \text{H}^+$ : 470.1881  $[\text{M} + \text{H}]^+$ ; found: 470.1883.

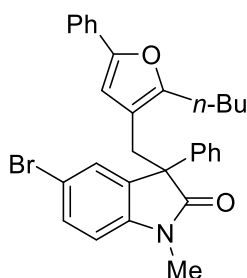

**5-Bromo-3-((2-butyl-5-phenylfuran-3-yl)methyl)-1-methyl-3-phenylindolin-2-one (5da)**

Prepared according to General Procedure 4 using starting material **1d** and (*E*)- $\beta$ -

chloroenone **2a**. The crude mixture was purified via silica-gel flash chromatography using 15:1 Pentanes: Et<sub>2</sub>O v:v as the mobile phase. The title compound was obtained as a pale yellow solid (66.7 mg, 0.13 mmol, 65 % yield, MP = 130-131 °C).

**<sup>1</sup>H NMR** (500 MHz, CDCl<sub>3</sub>) δ 7.46 (d, *J* = 8.0 Hz, 2H), 7.44 (d, *J* = 7.0 Hz, 2H), 7.38 (dd, *J*<sub>1</sub> = 8.0 Hz, *J*<sub>2</sub> = 2.0 Hz, 1H), 7.36 (t, *J* = 7.5 Hz, 2H), 7.32 (d, *J* = 2.0 Hz, 1H), 7.31 (d, *J* = 7.0 Hz, 1H), 7.29 (t, *J* = 7.8 Hz, 2H), 7.16 (t, *J* = 7.3 Hz, 1H), 6.60 (d, *J* = 8.5 Hz, 1H), 5.97 (s, 1H), 3.44 (d, *J* = 14.0 Hz, 1H), 3.26 (d, *J* = 14.0 Hz, 1H), 3.06 (s, 3H), 2.46-2.39 (m, 1H), 2.37-2.30 (m, 1H), 1.55-1.47 (m, 1H), 1.44-1.37 (m, 1H), 1.36-1.29 (m, 2H), 0.91 (t, *J* = 7.3 Hz, 3H). **<sup>13</sup>C NMR** (125 MHz, CDCl<sub>3</sub>) δ 177.6, 153.7, 150.8, 143.1, 138.9, 133.9, 131.1, 131.0, 128.7, 128.5, 128.2, 127.7, 127.0, 126.7, 123.1, 115.0, 114.5, 109.6, 106.8, 57.4, 33.6, 30.4, 26.4, 25.8, 22.6, 13.9. **IR** (neat, cm<sup>-1</sup>): ν 3060, 2952, 2928, 2865, 1713, 1602, 1485, 1342, 1268, 1137, 1090, 924, 809, 758, 691. **HRMS** (ESI): *m/z* calcd for C<sub>30</sub>H<sub>28</sub>BrNO<sub>2</sub>+Na<sup>+</sup>: 536.1196 [M+Na]<sup>+</sup>; found 536.1199.

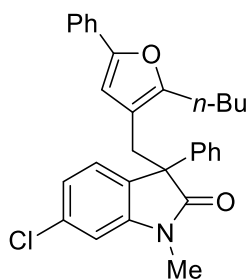

**3-((2-Butyl-5-phenylfuran-3-yl)methyl)-6-chloro-1-methyl-3-phenylindolin-2-one (5ea)**

Prepared according to General Procedure **4** using starting material **1e** and (*E*)-β-chloroenone **2a**. The crude mixture was purified via silica-gel flash chromatography using 15:1 Pentanes: Et<sub>2</sub>O v:v as the mobile phase. The title compound was obtained as a pale yellow wax (52.5 mg, 0.112 mmol, 56 % yield).

**<sup>1</sup>H NMR** (500 MHz, CDCl<sub>3</sub>) δ 7.47 (d, *J* = 7.5 Hz, 2H), 7.44 (d, *J* = 7.0 Hz, 2H), 7.35 (t, *J* = 7.3 Hz, 2H), 7.30 (t, *J* = 7.8 Hz, 3H), 7.17 (t, *J* = 7.3 Hz, 1H), 7.11 (dd, *J*<sub>1</sub> = 7.5 Hz, *J*<sub>2</sub> = 2.0 Hz, 1H), 7.06 (dt, *J*<sub>1</sub> = 7.5 Hz, *J*<sub>2</sub> = 2.0 Hz, 1H), 6.75 (s, 1H), 5.90 (s, 1H), 3.39 (d, *J* = 13.5 Hz, 1H), 3.27 (d, *J* = 13.5 Hz, 1H), 3.07 (s, 3H), 2.45-2.37 (m, 1H), 2.36-2.29 (m, 1H), 1.53-1.46 (m, 1H), 1.41-1.34 (m, 1H), 1.33-1.26 (m, 2H), 0.90 (d, *J* = 7.3 Hz, 3H). **<sup>13</sup>C NMR** (125 MHz, CDCl<sub>3</sub>) δ 178.1, 153.7, 150.8, 145.3, 139.1, 134.1, 131.0, 130.0, 128.7, 128.5, 127.7, 127.1, 126.7, 126.1, 123.2, 122.0, 114.8, 109.0, 106.8, 56.9, 33.7, 30.5, 26.4, 25.7, 22.5, 13.9. **IR** (neat, cm<sup>-1</sup>): ν 3061, 3032, 2954, 2928, 2865, 1716, 1602, 1490, 1443, 1366, 1333, 1295, 1242, 1183, 1070, 812, 760, 694. **HRMS** (DART): *m/z* calcd for C<sub>30</sub>H<sub>28</sub>ClNO<sub>2</sub>+H<sup>+</sup>: 470.1881 [M+H]<sup>+</sup>; found: 470.1888.



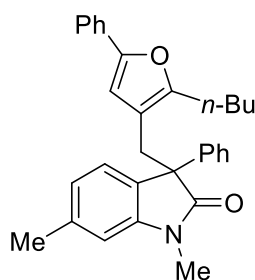

**3-((2-Butyl-5-phenylfuran-3-yl)methyl)-1,6-dimethyl-3-phenylindolin-2-one (5fa)**

Prepared according to General Procedure 4 using starting material **1f** and (*E*)- $\beta$ -chloroenone **2a**. The crude mixture was purified via silica-gel flash chromatography using 15:1 Pentanes: Et<sub>2</sub>O v:v as the mobile phase. The title compound was obtained as a yellow sticky oil (62.0 mg, 0.138 mmol, 69 % yield).

<sup>1</sup>H NMR (500 MHz, CDCl<sub>3</sub>)  $\delta$  7.51 (d, *J* = 7.5 Hz, 2H), 7.42 (d, *J* = 7.5 Hz, 2H), 7.34 (t, *J* = 7.5 Hz, 2H), 7.30 (d, *J* = 7.5 Hz, 2H), 7.27 (d, *J* = 2.0 Hz, 1H), 7.16 (t, *J* = 7.3 Hz, 1H), 7.08 (d, *J* = 7.5 Hz, 1H), 6.89 (d, *J* = 7.5 Hz, 1H), 6.56 (s, 1H), 5.91 (s, 1H), 3.39 (d, *J* = 13.5 Hz, 1H), 3.26 (d, *J* = 13.5 Hz, 1H), 3.06 (s, 3H), 2.45-2.38 (m, 1H), 2.37 (s, 3H), 2.36-2.30 (m, 1H), 1.52-1.45 (m, 1H), 1.38-1.33 (m, 1H), 1.32-1.27 (m, 2H), 0.89 (t, *J* = 7.3 Hz, 3H). <sup>13</sup>C NMR (125 MHz, CDCl<sub>3</sub>)  $\delta$  178.4, 153.7, 150.4, 144.1, 139.9, 138.3, 131.2, 128.5, 128.5, 128.5, 127.3, 127.2, 126.5, 125.0, 123.1, 122.7, 115.2, 109.2, 107.1, 56.9, 33.8, 30.5, 26.2, 25.7, 22.5, 21.8, 13.9. IR (neat, cm<sup>-1</sup>):  $\nu$  3057, 3029, 2956, 2928, 2871, 1712, 1620, 1600, 1554, 1467, 1448, 1373, 1338, 1256, 1191, 1088, 1037, 932, 813, 761, 735, 695. HRMS (ESI): *m/z* calcd for C<sub>31</sub>H<sub>31</sub>NO<sub>2</sub>+Na<sup>+</sup>: 472.2247 [M+Na]<sup>+</sup>; found 472.2262.

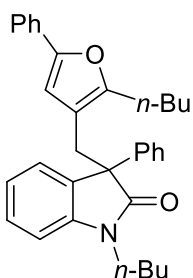

**1-Butyl-3-((2-butyl-5-phenylfuran-3-yl)methyl)-3-phenylindolin-2-one (5ga)**

Prepared according to General Procedure 4 using starting material **1g** and (*E*)- $\beta$ -chloroenone **2a**. The crude mixture was purified via silica-gel flash chromatography using 15:1 Pentanes: Et<sub>2</sub>O v:v as the mobile phase. The title compound was obtained as a yellow oil (52.4 mg, 0.11 mmol, 55 % yield).

<sup>1</sup>H NMR (500 MHz, CDCl<sub>3</sub>)  $\delta$  7.48 (d, *J* = 8.0 Hz, 2H), 7.38 (d, *J* = 8.0 Hz, 2H), 7.34 (t, *J* = 8.3 Hz, 2H), 7.29-7.24 (m, 5H), 7.13 (t, *J* = 7.5 Hz, 1H), 7.09 (t, *J* = 7.5 Hz, 1H), 6.73 (d, *J* = 8.0 Hz, 1H), 5.74 (s, 1H), 3.71-3.64 (m, 1H), 3.48 (d, *J* = 13.5 Hz, 1H), 3.44-3.37 (m, 1H), 3.25 (d, *J* = 13.5 Hz, 1H), 2.49-2.41 (m, 2H), 1.58-1.49 (m, 1H), 1.45-1.38 (m, 1H), 1.37-1.29 (m, 4H), 1.17-1.07 (m, 2H), 0.90 (t, *J* = 7.3 Hz, 3H), 0.72 (t, *J* = 7.3 Hz, 3H). <sup>13</sup>C NMR (125 MHz, CDCl<sub>3</sub>)  $\delta$  177.8, 153.7, 150.4, 143.8, 140.1, 132.2, 131.1, 128.6, 128.4, 128.2, 127.3, 127.1, 126.4, 125.1, 123.1, 122.0, 115.0, 108.5,

107.2, 57.1, 39.9, 33.6, 30.5, 29.3, 25.7, 22.5, 20.0, 13.9, 13.7. **IR** (neat,  $\text{cm}^{-1}$ ):  $\nu$  3057, 3032, 2956, 2929, 2870, 1707, 1610, 1487, 1465, 1357, 1198, 1097, 1025, 932, 815, 756, 730, 692. **HRMS** (ESI):  $m/z$  calcd for  $\text{C}_{33}\text{H}_{35}\text{NO}_2+\text{H}^+$ : 478.2741  $[\text{M}+\text{H}]^+$ ; found 478.2742.

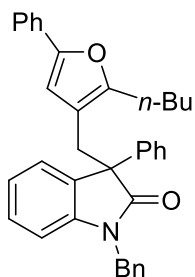

**1-Benzyl-3-((2-butyl-5-phenylfuran-3-yl)methyl)-3-phenylindolin-2-one (5ha)**

Prepared according to General Procedure 4 using starting material **1h** and (*E*)- $\beta$ -chloroenone **2a**. The crude mixture was purified via silica-gel flash chromatography using 15:1 Pentanes:  $\text{Et}_2\text{O}$  v:v as the mobile phase. The title compound was obtained as a yellow oil (61.4 mg, 0.12 mmol, 60 % yield).

**$^1\text{H}$  NMR** (500 MHz,  $\text{CDCl}_3$ )  $\delta$  7.53 (d,  $J = 7.5$  Hz, 2H), 7.37 (dd,  $J_1 = 7.5$  Hz,  $J_2 = 2.5$  Hz, 3H), 7.34 (d,  $J = 6.5$  Hz, 1H), 7.31 (d,  $J = 5.0$  Hz, 1H), 7.29 (d,  $J = 5.5$  Hz, 1H), 7.27 (s, 1H), 7.24 (d,  $J = 7.0$  Hz, 1H), 7.17 (d,  $J = 6.5$  Hz, 1H), 7.14 (d,  $J = 6.5$  Hz, 1H), 7.10 (t,  $J = 7.5$  Hz, 1H), 7.04-6.97 (m, 3H), 6.87 (d,  $J = 7.5$  Hz, 2H), 6.56 (d,  $J = 8.0$  Hz, 1H), 5.75 (s, 1H), 5.01 (d,  $J = 16.0$  Hz, 1H), 4.58 (d,  $J = 16.0$  Hz, 1H), 3.60 (d,  $J = 14.0$  Hz, 1H), 3.31 (d,  $J = 14.0$  Hz, 1H), 2.48 (t,  $J = 7.5$  Hz, 2H), 1.54-1.46 (m, 1H), 1.44-1.36 (m, 1H), 1.35-1.27 (m, 2H), 0.86 (t,  $J = 7.3$  Hz, 3H).  **$^{13}\text{C}$  NMR** (125 MHz,  $\text{CDCl}_3$ )  $\delta$  178.0, 154.0, 150.6, 143.5, 140.2, 135.4, 132.0, 131.1, 128.7, 128.6, 128.5, 128.3, 127.5, 127.1, 127.1, 126.6, 126.6, 125.1, 123.2, 122.3, 115.2, 109.5, 107.4, 57.3, 43.9, 33.5, 30.5, 25.8, 22.5, 13.9. **IR** (neat,  $\text{cm}^{-1}$ ):  $\nu$  3058, 3032, 2956, 2928, 2870, 1715, 1611, 1488, 1466, 1359, 1265, 1223, 1189, 1073, 1036, 945, 932, 814, 759, 694. **HRMS** (ESI):  $m/z$  calcd for  $\text{C}_{36}\text{H}_{33}\text{NO}_2+\text{H}^+$ : 512.2584  $[\text{M}+\text{H}]^+$ ; found: 512.2579.

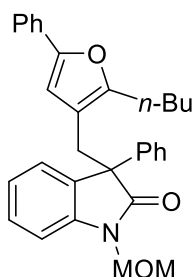

**3-((2-Butyl-5-phenylfuran-3-yl)methyl)-1-(methoxymethyl)-3-phenylindolin-2-one (5ia)**

Prepared according to General Procedure 4 using starting material **1i** and (*E*)- $\beta$ -chloroenone **2a**. The crude mixture was purified via silica-gel flash chromatography using 15:1 Pentanes:  $\text{Et}_2\text{O}$  v:v as the mobile phase. The title compound was obtained as a yellow oil (44.7 mg, 0.096 mmol, 48 % yield).

**<sup>1</sup>H NMR** (500 MHz, CDCl<sub>3</sub>) δ 7.50 (d, *J* = 7.5 Hz, 2H), 7.35 (t, *J* = 8.3 Hz, 4H), 7.31 (d, *J* = 7.0 Hz, 1H), 7.30 (d, *J* = 7.0 Hz, 2H), 7.26 (d, *J* = 7.8 Hz, 2H), 7.16 (t, *J* = 7.5 Hz, 1H), 7.14 (t, *J* = 7.3 Hz, 1H), 6.98 (d, *J* = 7.5 Hz, 1H), 5.72 (s, 1H), 5.02 (d, *J* = 11.0 Hz, 1H), 4.96 (d, *J* = 11.0 Hz, 1H), 3.52 (d, *J* = 14.0 Hz, 1H), 3.29 (d, *J* = 14.0 Hz, 1H), 2.96 (s, 3H), 2.47 (t, *J* = 7.5 Hz, 2H), 1.57-1.49 (m, 1H), 1.46-1.38 (m, 1H), 1.37-1.28 (m, 2H), 0.91 (t, *J* = 7.3 Hz, 3H). **<sup>13</sup>C NMR** (125 MHz, CDCl<sub>3</sub>) δ 178.6, 153.8, 150.6, 142.6, 139.9, 131.3, 131.0, 128.7, 128.5, 128.5, 127.5, 127.1, 126.6, 125.3, 123.1, 122.8, 115.1, 109.9, 107.1, 71.5, 57.7, 55.5, 33.6, 30.5, 25.8, 22.5, 13.9. **IR** (neat, cm<sup>-1</sup>): ν 3057, 2929, 2865, 1719, 1607, 1488, 1458, 1341, 1295, 1235, 1186, 1086, 918, 813, 756, 696. **HRMS** (ESI): *m/z* calcd for C<sub>31</sub>H<sub>31</sub>NO<sub>3</sub>+H<sup>+</sup>: 466.2377 [M+H]<sup>+</sup>; found: 466.2379.

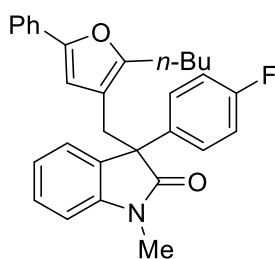

**3-((2-Butyl-5-phenylfuran-3-yl)methyl)-3-(4-fluorophenyl)-1-methylindolin-2-one (5ja)**

Prepared according to General Procedure 4 using starting material **1j** and (*E*)- $\beta$ -chloroenone **2a**. The crude mixture was purified via silica-gel flash chromatography using 15:1 Pentanes: Et<sub>2</sub>O v:v as the mobile phase. The title compound was obtained as a yellow sticky oil (66.2 mg, 0.146 mmol, 73 % yield).

**<sup>1</sup>H NMR** (500 MHz, CDCl<sub>3</sub>) δ 7.49-7.46 (m, 2H), 7.42 (dd, *J*<sub>1</sub> = 8.5 Hz, *J*<sub>2</sub> = 1.0 Hz, 2H), 7.29 (t, *J* = 8.0 Hz, 3H), 7.20 (d, *J* = 7.5 Hz, 1H), 7.16 (t, *J* = 7.5 Hz, 1H), 7.10 (t, *J* = 7.5 Hz, 1H), 7.03 (t, *J* = 8.8 Hz, 2H), 6.75 (d, *J* = 7.5 Hz, 1H), 5.85 (s, 1H), 3.37 (d, *J* = 14.0 Hz, 1H), 3.24 (d, *J* = 14.0 Hz, 1H), 3.08 (s, 3H), 2.44-2.37 (m, 1H), 2.36-2.29 (m, 1H), 1.52-1.45 (m, 1H), 1.41-1.35 (m, 1H), 1.32-1.25 (m, 2H), 0.89 (d, *J* = 7.3 Hz, 3H). **<sup>13</sup>C NMR** (125 MHz, CDCl<sub>3</sub>) δ 177.9, 162.2 (d, *J* = 245.1 Hz), 153.7, 150.6, 144.1, 135.4 (d, *J* = 3.3 Hz), 131.3, 131.0, 129.0 (d, *J* = 7.9 Hz), 128.5, 128.5, 126.6, 125.2, 123.1, 122.3, 115.3 (d, *J* = 21.1 Hz), 114.8, 108.4, 106.9, 56.5, 34.1, 30.5, 26.3, 25.7, 22.5, 13.9. **<sup>19</sup>F NMR** (470 MHz, CDCl<sub>3</sub>): δ -115.28 – -115.35 (m, 1F). **IR** (neat, cm<sup>-1</sup>): ν 3058, 2954, 2928, 2866, 1710, 1606, 1500, 1463, 1347, 1230, 1164, 1082, 1017, 813, 752, 693. **HRMS** (ESI): *m/z* calcd for C<sub>30</sub>H<sub>28</sub>FNO<sub>2</sub>+H<sup>+</sup>: 454.2177 [M+H]<sup>+</sup>; found: 454.2182.

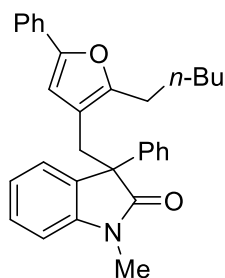

**1-Methyl-3-((2-pentyl-5-phenylfuran-3-yl)methyl)-3-phenylindolin-2-one (5ab)**

Prepared according to General Procedure 4 using starting material **1a** and (*E*)- $\beta$ -chloroenone **2b**. The crude mixture was purified via silica-gel flash chromatography using 15:1 Pentanes: Et<sub>2</sub>O v:v as the mobile phase. The title compound was obtained as a yellow solid (65.6 mg, 0.146 mmol, 73 % yield, MP = 77-78 °C).

**<sup>1</sup>H NMR** (500 MHz, CDCl<sub>3</sub>)  $\delta$  7.51 (d, *J* = 7.5 Hz, 2H), 7.41 (d, *J* = 7.0 Hz, 2H), 7.34 (t, *J* = 7.5 Hz, 2H), 7.30-7.23 (m, 4H), 7.21 (d, *J* = 7.5 Hz, 1H), 7.14 (t, *J* = 7.5 Hz, 1H), 7.08 (t, *J* = 7.5 Hz, 1H), 6.72 (d, *J* = 7.5 Hz, 1H), 5.87 (s, 1H), 3.42 (d, *J* = 14.0 Hz, 1H), 3.28 (d, *J* = 14.0 Hz, 1H), 3.06 (s, 3H), 2.45-2.38 (m, 1H), 2.37-2.29 (m, 1H), 1.56-1.47 (m, 1H), 1.44-1.35 (m, 1H), 1.32-1.22 (m, 4H), 0.88 (t, *J* = 7.0 Hz, 3H). **<sup>13</sup>C NMR** (125 MHz, CDCl<sub>3</sub>)  $\delta$  178.0, 153.7, 150.5, 144.1, 139.7, 131.6, 131.1, 128.5, 128.5, 128.3, 127.4, 127.2, 126.5, 125.2, 123.1, 122.2, 115.0, 108.2, 107.0, 57.1, 33.7, 31.5, 28.0, 26.2, 25.9, 22.5, 14.0. **IR** (neat, cm<sup>-1</sup>):  $\nu$  3057, 3036, 2954, 2926, 2854, 1709, 1611, 1491, 1467, 1447, 1370, 1349, 1250, 1180, 1081, 930, 910, 807, 765, 750, 693. **HRMS** (ESI): *m/z* calcd for C<sub>31</sub>H<sub>31</sub>NO<sub>2</sub>+H<sup>+</sup>: 450.2428 [M+H]<sup>+</sup>; found: 450.2432.

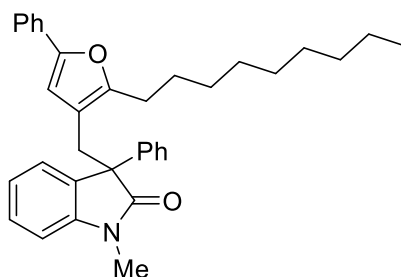

**1-Methyl-3-((2-nonyl-5-phenylfuran-3-yl)methyl)-3-phenylindolin-2-one (5ac)**

Prepared according to General Procedure 4 using starting material **1a** and (*E*)- $\beta$ -chloroenone **2c**. The crude mixture was purified via silica-gel flash chromatography using 15:1 Pentanes: Et<sub>2</sub>O v:v as the mobile phase. The title compound was obtained as a yellow sticky oil (90.9 mg, 0.18 mmol, 90 % yield).

**<sup>1</sup>H NMR** (500 MHz, CDCl<sub>3</sub>)  $\delta$  7.51 (d, *J* = 7.0 Hz, 2H), 7.41 (d, *J* = 7.0 Hz, 2H), 7.34 (t, *J* = 7.5 Hz, 2H), 7.30-7.24 (m, 4H), 7.21 (d, *J* = 7.0 Hz, 1H), 7.15 (t, *J* = 7.5 Hz, 1H), 7.09 (t, *J* = 7.5 Hz, 1H), 6.73 (d, *J* = 7.5 Hz, 1H), 5.87 (s, 1H), 3.42 (d, *J* = 13.5 Hz, 1H), 3.28 (d, *J* = 14.0 Hz, 1H), 3.07 (s, 3H), 2.44-2.38 (m, 1H), 2.36-2.30 (m, 1H), 1.54-1.45 (m, 1H), 1.42-1.34 (m, 1H), 1.32-1.20 (m, 12H), 0.88 (t, *J* = 6.8 Hz, 3H). **<sup>13</sup>C NMR** (125 MHz, CDCl<sub>3</sub>)  $\delta$  178.0, 153.7, 150.5, 144.1, 139.7, 131.6, 131.1, 128.5, 128.5, 128.3, 127.4, 127.2, 126.5, 125.2, 123.1, 122.2, 115.0, 108.2, 107.0, 57.1, 33.7, 31.9, 29.5, 29.4, 29.4, 29.3, 28.3, 26.2, 26.0, 22.7, 14.1. **IR** (neat, cm<sup>-1</sup>):  $\nu$  3058, 3030,

2952, 2923, 2853, 1711, 1611, 1492, 1469, 1373, 1348, 1254, 1182, 1079, 931, 811, 758, 694. **HRMS** (ESI):  $m/z$  calcd for  $C_{35}H_{39}NO_2+H^+$ : 506.3054  $[M+H]^+$ ; found: 506.3062.

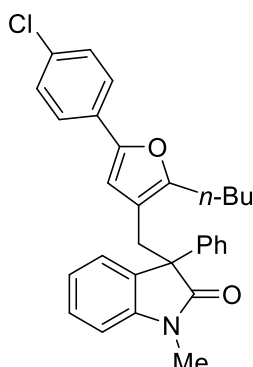

**3-((2-Butyl-5-(4-chlorophenyl)furan-3-yl)methyl)-1-methyl-3-phenylindolin-2-one (5ad)**

Prepared according to General Procedure 4 using starting material **1a** and (*E*)- $\beta$ -chloroenone **2d**. The crude mixture was purified via silica-gel flash chromatography using 15:1 Pentanes: Et<sub>2</sub>O v:v as the mobile phase. The title compound was obtained as a pale yellow solid (61.0 mg, 0.13 mmol, 65 % yield, MP = 125-126 °C).

**<sup>1</sup>H NMR** (500 MHz, CDCl<sub>3</sub>)  $\delta$  7.50 (d,  $J$  = 7.5 Hz, 2H), 7.35 (d,  $J$  = 7.0 Hz, 2H), 7.33 (d,  $J$  = 2.5 Hz, 1H), 7.31 (t,  $J$  = 2.0 Hz, 1H), 7.29 (d,  $J$  = 5.0 Hz, 1H), 7.27 (d,  $J$  = 5.5 Hz, 1H), 7.24 (d,  $J$  = 2.0 Hz, 1H), 7.22 (d,  $J$  = 7.5 Hz, 2H), 7.09 (t,  $J$  = 7.5 Hz, 1H), 6.74 (d,  $J$  = 8.0 Hz, 1H), 5.85 (s, 1H), 3.42 (d,  $J$  = 13.5 Hz, 1H), 3.27 (d,  $J$  = 13.5 Hz, 1H), 3.06 (s, 3H), 2.45-2.38 (m, 1H), 2.37-2.29 (m, 1H), 1.52-1.44 (m, 1H), 1.40-1.34 (m, 1H), 1.33-1.28 (m, 2H), 0.89 (t,  $J$  = 7.3 Hz, 3H). **<sup>13</sup>C NMR** (125 MHz, CDCl<sub>3</sub>)  $\delta$  178.0, 154.1, 149.5, 144.1, 139.6, 132.0, 131.6, 129.5, 128.7, 128.6, 128.3, 127.5, 127.2, 125.2, 124.3, 122.2, 115.2, 108.2, 107.5, 57.1, 33.7, 30.4, 26.2, 25.7, 22.5, 13.9. **IR** (neat, cm<sup>-1</sup>):  $\nu$  3055, 3029, 2952, 2925, 2857, 1707, 1599, 1485, 1468, 1373, 1349, 1253, 1189, 1088, 1011, 877, 838, 749, 697. **HRMS** (ESI):  $m/z$  calcd for  $C_{30}H_{28}ClNO_2+Na^+$ : 492.1701  $[M+Na]^+$ ; found: 492.1698.

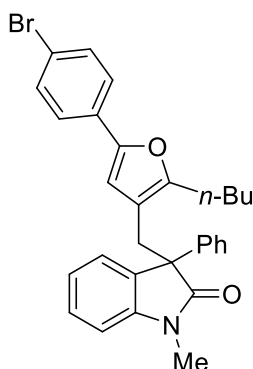

**3-((5-(4-Bromophenyl)-2-butylfuran-3-yl)methyl)-1-methyl-3-phenylindolin-2-one (5ae)**

Prepared according to General Procedure 4 using starting material **1a** and (*E*)- $\beta$ -

chloroenone **2e**. The crude mixture was purified via silica-gel flash chromatography using 15:1 Pentanes: Et<sub>2</sub>O v:v as the mobile phase. The title compound was obtained as a pale yellow solid (51.3 mg, 0.10 mmol, 50 % yield, MP = 122 -123 °C).

**<sup>1</sup>H NMR** (500 MHz, CDCl<sub>3</sub>) δ 7.50 (d, *J* = 7.5 Hz, 2H), 7.39 (d, *J* = 8.5 Hz, 2H), 7.34 (t, *J* = 7.5 Hz, 2H), 7.31-7.25 (m, 4H), 7.22 (d, *J* = 7.5 Hz, 1H), 7.09 (t, *J* = 7.5 Hz, 1H), 6.74 (d, *J* = 7.5 Hz, 1H), 5.86 (s, 1H), 3.42 (d, *J* = 14.0 Hz, 1H), 3.27 (d, *J* = 13.5 Hz, 1H), 3.07 (s, 3H), 2.45-2.38 (m, 1H), 2.36-2.30 (m, 1H), 1.52-1.44 (m, 1H), 1.40-1.33 (m, 1H), 1.32-1.26 (m, 2H), 0.89 (t, *J* = 7.3 Hz, 3H). **<sup>13</sup>C NMR** (125 MHz, CDCl<sub>3</sub>) δ 178.0, 154.2, 149.5, 144.1, 139.6, 131.6, 131.6, 130.0, 128.6, 128.3, 127.5, 127.2, 125.2, 124.6, 122.2, 120.1, 115.3, 108.2, 107.6, 57.1, 33.7, 30.4, 26.2, 25.7, 22.5, 13.9. **IR** (neat, cm<sup>-1</sup>): ν 3054, 3026, 2956, 2927, 2870, 1711, 1649, 1589, 1494, 1447, 1374, 1334, 1259, 1186, 1072, 980, 884, 759, 693. **HRMS** (ESI): *m/z* calcd for C<sub>30</sub>H<sub>28</sub>BrNO<sub>2</sub>+H<sup>+</sup>: 514.1376 [M+H]<sup>+</sup>; found 514.1379.

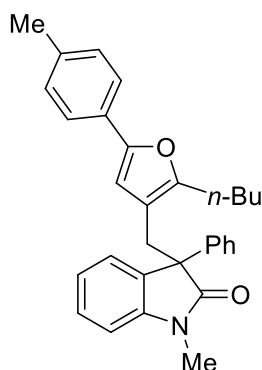

**3-((2-Butyl-5-(p-tolyl)furan-3-yl)methyl)-1-methyl-3-phenylindolin-2-one (5af)**

Prepared according to General Procedure **4** using starting material **1a** and (*E*)-β-chloroenone **2f**. The crude mixture was purified via silica-gel flash chromatography using 15:1 Pentanes: Et<sub>2</sub>O v:v as the mobile phase. The title compound was obtained as a pale yellow solid (59.3 mg, 0.132 mmol, 66 % yield, MP = 116-117 °C).

**<sup>1</sup>H NMR** (500 MHz, CDCl<sub>3</sub>) δ 7.51 (dd, *J*<sub>1</sub> = 8.5 Hz, *J*<sub>2</sub> = 1.0 Hz, 2H), 7.34 (t, *J* = 7.5 Hz, 2H), 7.31 (d, *J* = 8.0 Hz, 2H), 7.29-7.24 (m, 2H), 7.21 (d, *J* = 7.0 Hz, 1H), 7.12-7.06 (m, 3H), 6.73 (d, *J* = 8.0 Hz, 1H), 5.80 (s, 1H), 3.41 (d, *J* = 14.0 Hz, 1H), 3.27 (d, *J* = 13.5 Hz, 1H), 3.07 (s, 3H), 2.44-2.37 (m, 1H), 2.36-2.29 (m, 1H), 2.31 (s, 3H), 1.53-1.44 (m, 1H), 1.40-1.33 (m, 1H), 1.32-1.26 (m, 2H), 0.88 (t, *J* = 7.3 Hz, 3H). **<sup>13</sup>C NMR** (125 MHz, CDCl<sub>3</sub>) δ 178.1, 153.3, 150.7, 144.1, 139.7, 136.3, 131.6, 129.2, 128.5, 128.4, 128.3, 127.4, 127.2, 125.2, 123.1, 122.2, 114.9, 108.2, 106.2, 57.1, 33.8, 30.5, 26.2, 25.7, 22.5, 21.2, 13.9. **IR** (neat, cm<sup>-1</sup>): ν 3054, 3029, 2951, 2922, 2855, 1709, 1610, 1492, 1468, 1373, 1349, 1255, 1169, 1082, 1016, 929, 821, 755, 698. **HRMS** (ESI): *m/z* calcd for C<sub>31</sub>H<sub>31</sub>NO<sub>2</sub>+H<sup>+</sup>: 450.2428 [M+H]<sup>+</sup>; found: 450.2434.

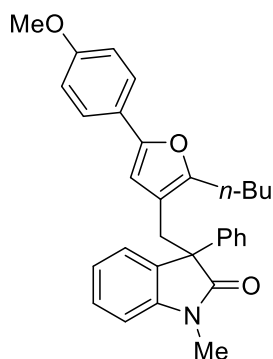

**3-((2-Butyl-5-(4-methoxyphenyl)furan-3-yl)methyl)-1-methyl-3-phenylindolin-2-one (5ag)**

Prepared according to General Procedure 4 using starting material **1a** and (*E*)- $\beta$ -chloroenone **2g**. The crude mixture was purified via silica-gel flash chromatography using 12:1 Pentanes: Et<sub>2</sub>O v:v as the mobile phase. The title compound was obtained as a pale yellow solid (80.9 mg, 0.174 mmol, 87 % yield, MP = 121-123 °C).

<sup>1</sup>H NMR (500 MHz, CDCl<sub>3</sub>)  $\delta$  7.51 (d, *J* = 7.0 Hz, 2H), 7.36-7.32 (m, 4H), 7.28 (d, *J* = 7.0 Hz, 1H), 7.25 (dd, *J*<sub>1</sub> = 7.5 Hz, *J*<sub>2</sub> = 1.0 Hz, 1H), 7.21 (d, *J* = 7.0 Hz, 1H), 7.08 (t, *J* = 7.5 Hz, 1H), 6.83 (d, *J* = 8.5 Hz, 2H), 6.73 (d, *J* = 7.5 Hz, 1H), 5.73 (s, 1H), 3.78 (s, 3H), 3.40 (d, *J* = 13.5 Hz, 1H), 3.27 (d, *J* = 13.5 Hz, 1H), 3.07 (s, 3H), 2.44-2.37 (m, 1H), 2.35-2.28 (m, 1H), 1.52-1.44 (m, 1H), 1.40-1.33 (m, 1H), 1.32-1.26 (m, 2H), 0.88 (t, *J* = 7.3 Hz, 3H). <sup>13</sup>C NMR (125 MHz, CDCl<sub>3</sub>)  $\delta$  178.1, 158.5, 152.9, 150.5, 144.1, 139.7, 131.6, 128.5, 128.2, 127.4, 127.2, 125.2, 124.5, 124.3, 122.2, 114.8, 114.0, 108.2, 105.4, 57.1, 55.3, 33.8, 30.5, 26.2, 25.6, 22.5, 13.9. IR (neat, cm<sup>-1</sup>):  $\nu$  3055, 3031, 2951, 2924, 2860, 1705, 1609, 1499, 1461, 1375, 1350, 1243, 1177, 1083, 1030, 928, 836, 754, 699. HRMS (ESI): *m/z* calcd for C<sub>31</sub>H<sub>31</sub>NO<sub>3</sub>+Na<sup>+</sup>: 488.2196 [M+Na]<sup>+</sup>; found: 488.2208.

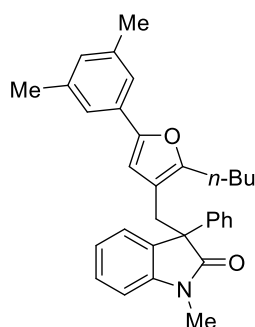

**3-((2-Butyl-5-(3,5-dimethylphenyl)furan-3-yl)methyl)-1-methyl-3-phenylindolin-2-one (5ah)**

Prepared according to General Procedure 4 using starting material **1a** and (*E*)- $\beta$ -chloroenone **2h**. The crude mixture was purified via silica-gel flash chromatography using 15:1 Pentanes: Et<sub>2</sub>O v:v as the mobile phase. The title compound was obtained as a yellow wax (72.3 mg, 0.156 mmol, 78 % yield).

<sup>1</sup>H NMR (500 MHz, CDCl<sub>3</sub>)  $\delta$  7.50 (d, *J* = 7.0 Hz, 2H), 7.34 (t, *J* = 7.5 Hz, 2H), 7.28 (t, *J* = 7.5 Hz, 1H), 7.25 (t, *J* = 7.5 Hz, 1H), 7.21 (d, *J* = 7.0 Hz, 1H), 7.08 (t, *J* = 7.5 Hz,

1H), 7.05 (s, 2H), 6.80 (s, 1H), 6.72 (d,  $J = 7.5$  Hz, 1H), 5.89 (s, 1H), 3.43 (d,  $J = 13.5$  Hz, 1H), 3.27 (d,  $J = 14.0$  Hz, 1H), 3.07 (s, 3H), 2.43-2.36 (m, 1H), 2.34-2.30 (m, 1H), 2.28 (s, 6H), 1.53-1.44 (m, 1H), 1.38-1.32 (m, 1H), 1.31-1.25 (m, 2H), 0.89 (t,  $J = 7.0$  Hz, 3H).  $^{13}\text{C}$  NMR (125 MHz,  $\text{CDCl}_3$ )  $\delta$  178.1, 153.4, 150.8, 144.1, 139.7, 138.0, 131.6, 131.0, 129.0, 128.6, 128.4, 128.3, 128.2, 127.4, 127.2, 125.1, 122.2, 120.9, 114.8, 108.2, 106.8, 57.2, 33.7, 30.5, 26.3, 25.7, 22.5, 21.3, 21.3, 13.9. IR (neat,  $\text{cm}^{-1}$ ):  $\nu$  3054, 3029, 2955, 2925, 2869, 1711, 1610, 1494, 1469, 1373, 1347, 1253, 1184, 1080, 948, 846, 752, 696. HRMS (ESI):  $m/z$  calcd for  $\text{C}_{32}\text{H}_{33}\text{NO}_2 + \text{Na}^+$ : 486.2404  $[\text{M} + \text{Na}]^+$ ; found: 486.2424.

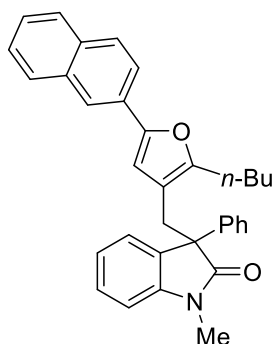

**3-((2-Butyl-5-(naphthalen-2-yl)furan-3-yl)methyl)-1-methyl-3-phenylindolin-2-one (5ai)**

Prepared according to General Procedure 4 using starting material 1a and (*E*)- $\beta$ -chloroenone 2i. The crude mixture was purified via silica-gel flash chromatography using 15:1 Pentanes:  $\text{Et}_2\text{O}$  v:v as the mobile phase. The title compound was obtained as a pale yellow solid (61.1 mg, 0.126 mmol, 63 % yield, MP = 128-130  $^\circ\text{C}$ ).

$^1\text{H}$  NMR (500 MHz,  $\text{CDCl}_3$ )  $\delta$  7.89 (s, 1H), 7.78 (d,  $J = 8.0$  Hz, 1H), 7.73 (t,  $J = 8.0$  Hz, 2H), 7.52 (dd,  $J_1 = 7.0$  Hz,  $J_2 = 1.5$  Hz, 2H), 7.48 (dd,  $J_1 = 8.5$  Hz,  $J_2 = 1.5$  Hz, 1H), 7.43 (td,  $J_1 = 8.0$  Hz,  $J_2 = 1.0$  Hz, 1H), 7.39 (dd,  $J_1 = 8.0$  Hz,  $J_2 = 1.0$  Hz, 1H), 7.35 (t,  $J = 7.5$  Hz, 2H), 7.32-7.22 (m, 3H), 7.10 (t,  $J = 7.5$  Hz, 1H), 6.72 (d,  $J = 7.5$  Hz, 1H), 6.00 (s, 1H), 3.46 (d,  $J = 13.5$  Hz, 1H), 3.31 (d,  $J = 13.5$  Hz, 1H), 3.07 (s, 3H), 2.49-2.42 (m, 1H), 2.41-2.34 (m, 1H), 1.59-1.50 (m, 1H), 1.45-1.38 (m, 1H), 1.37-1.29 (m, 2H), 0.91 (t,  $J = 7.3$  Hz, 3H).  $^{13}\text{C}$  NMR (125 MHz,  $\text{CDCl}_3$ )  $\delta$  178.0, 154.1, 150.6, 144.1, 139.7, 133.5, 132.3, 131.6, 128.6, 128.4, 128.3, 128.1, 127.9, 127.7, 127.4, 127.2, 126.3, 125.5, 125.2, 122.2, 122.0, 121.0, 115.2, 108.2, 107.8, 57.2, 33.8, 30.5, 26.3, 25.8, 22.5, 13.9. IR (neat,  $\text{cm}^{-1}$ ):  $\nu$  3052, 3029, 2956, 2921, 2851, 1712, 1601, 1491, 1465, 1370, 1346, 1256, 1130, 1081, 1019, 949, 893, 822, 752, 699. HRMS (ESI):  $m/z$  calcd for  $\text{C}_{34}\text{H}_{31}\text{NO}_2 + \text{H}^+$ : 486.2428  $[\text{M} + \text{H}]^+$ ; found: 486.2441.



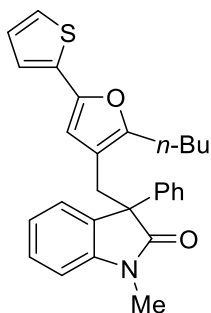

**3-((2-Butyl-5-(thiophen-2-yl)furan-3-yl)methyl)-1-methyl-3-phenylindolin-2-one (5aj)**

Prepared according to General Procedure 4 using starting material **1a** and (*E*)- $\beta$ -chloroenone **2j**. The crude mixture was purified via silica-gel flash chromatography using 15:1 Pentanes: Et<sub>2</sub>O v:v as the mobile phase. The title compound was obtained as a yellow solid (65.3 mg, 0.148 mmol, 74 % yield, MP = 133-135 °C).

<sup>1</sup>H NMR (500 MHz, CDCl<sub>3</sub>)  $\delta$  7.50 (d, *J* = 7.5 Hz, 2H), 7.33 (t, *J* = 7.5 Hz, 2H), 7.30-7.24 (m, 2H), 7.21 (d, *J* = 7.5 Hz, 1H), 7.10-7.05 (m, 2H), 6.99 (dd, *J*<sub>1</sub> = 8.5 Hz, *J*<sub>2</sub> = 1.0 Hz, 1H), 6.93 (dd, *J*<sub>1</sub> = 5.0 Hz, *J*<sub>2</sub> = 3.5 Hz, 1H), 6.74 (d, *J* = 7.5 Hz, 1H), 5.72 (s, 1H), 3.41 (d, *J* = 14.0 Hz, 1H), 3.25 (d, *J* = 13.5 Hz, 1H), 3.08 (s, 3H), 2.43-2.36 (m, 1H), 2.35-2.28 (m, 1H), 1.51-1.43 (m, 1H), 1.39-1.32 (m, 1H), 1.31-1.25 (m, 2H), 0.88 (t, *J* = 7.3 Hz, 3H). <sup>13</sup>C NMR (125 MHz, CDCl<sub>3</sub>)  $\delta$  178.0, 153.3, 146.2, 144.1, 139.6, 134.2, 131.5, 128.6, 128.3, 127.4, 127.4, 127.2, 125.1, 123.1, 122.2, 121.3, 115.0, 108.2, 107.0, 57.1, 33.7, 30.4, 26.2, 25.6, 22.4, 13.9. IR (neat, cm<sup>-1</sup>):  $\nu$  3066, 2953, 2931, 2869, 1705, 1610, 1493, 1465, 1374, 1349, 1254, 1133, 1085, 949, 850, 809, 749, 701, 644. HRMS (ESI): *m/z* calcd for C<sub>28</sub>H<sub>27</sub>NO<sub>2</sub>S+H<sup>+</sup>: 442.1835 [M+H]<sup>+</sup>; found: 442.1850.

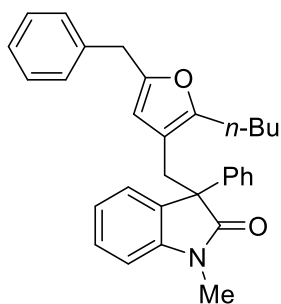

**3-((5-Benzyl-2-butylfuran-3-yl)methyl)-1-methyl-3-phenylindolin-2-one (5ak)**

Prepared according to General Procedure 4 using starting material **1a** and (*E*)- $\beta$ -chloroenone **2k**. The crude mixture was purified via silica-gel flash chromatography using 15:1 Pentanes: Et<sub>2</sub>O v:v as the mobile phase. The title compound was obtained as a yellow oil (30.5 mg, 0.068 mmol, 34 % yield).

<sup>1</sup>H NMR (500 MHz, CDCl<sub>3</sub>)  $\delta$  7.45 (d, *J* = 7.0 Hz, 2H), 7.31 (t, *J* = 7.5 Hz, 2H), 7.26 (dd, *J*<sub>1</sub> = 7.5 Hz, *J*<sub>2</sub> = 1.0 Hz, 2H), 7.24 (dd, *J*<sub>1</sub> = 7.5 Hz, *J*<sub>2</sub> = 1.0 Hz, 2H), 7.19 (d, *J* = 7.5 Hz, 1H), 7.16 (d, *J* = 7.5 Hz, 1H), 7.04 (t, *J* = 7.5 Hz, 1H), 6.97 (d, *J* = 7.0 Hz, 2H), 6.71 (d, *J* = 8.0 Hz, 1H), 5.16 (s, 1H), 3.71 (d, *J* = 16.5 Hz, 1H), 3.68 (d, *J* = 16.5 Hz, 1H), 3.38 (d, *J* = 14.0 Hz, 1H), 3.18 (d, *J* = 13.5 Hz, 1H), 2.98 (s, 3H), 2.36-2.23 (m,

2H), 1.44-1.37 (m, 1H), 1.33-1.28 (m, 1H), 1.24-1.19 (m, 2H), 0.85 (t,  $J = 7.3$  Hz, 3H).  $^{13}\text{C}$  NMR (125 MHz,  $\text{CDCl}_3$ )  $\delta$  178.1, 152.5, 150.9, 144.1, 139.8, 138.8, 131.8, 128.5, 128.4, 128.2, 128.1, 127.3, 127.2, 126.1, 125.1, 122.2, 113.4, 108.2, 108.0, 57.2, 34.1, 33.8, 30.5, 26.1, 25.6, 22.4, 13.9. **IR** (neat,  $\text{cm}^{-1}$ ):  $\nu$  3059, 3028, 2955, 2925, 2856, 1710, 1611, 1494, 1469, 1373, 1348, 1254, 1128, 1079, 977, 801, 751, 696. **HRMS** (ESI):  $m/z$  calcd for  $\text{C}_{31}\text{H}_{31}\text{NO}_2 + \text{Na}^+$ : 472.2247  $[\text{M} + \text{Na}]^+$ ; found 472.2228.

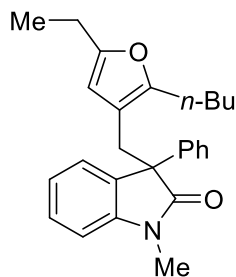

### 3-((2-Butyl-5-ethylfuran-3-yl)methyl)-1-methyl-3-phenylindolin-2-one (5al)

Prepared according to General Procedure 4 using starting material **1a** and (*E*)- $\beta$ -chloroenone **2l**. The crude mixture was purified via silica-gel flash chromatography using 15:1 Pentanes:  $\text{Et}_2\text{O}$  v:v as the mobile phase. The title compound was obtained as a yellow oil (51.9 mg, 0.134 mmol, 67 % yield).

$^1\text{H}$  NMR (500 MHz,  $\text{CDCl}_3$ )  $\delta$  7.48 (d,  $J = 7.5$  Hz, 2H), 7.32 (t,  $J = 7.5$  Hz, 2H), 7.26 (t,  $J = 7.5$  Hz, 2H), 7.16 (d,  $J = 7.5$  Hz, 1H), 7.05 (t,  $J = 7.5$  Hz, 1H), 6.74 (d,  $J = 7.5$  Hz, 1H), 5.17 (s, 1H), 3.34 (d,  $J = 13.5$  Hz, 1H), 3.21 (d,  $J = 13.5$  Hz, 1H), 3.07 (s, 3H), 2.38 (q,  $J = 7.5$  Hz, 2H), 2.33-2.26 (m, 1H), 2.25-2.18 (m, 1H), 1.43-1.35 (m, 1H), 1.31-1.26 (m, 1H), 1.25-1.20 (m, 2H), 1.02 (t,  $J = 7.5$  Hz, 3H), 0.86 (t,  $J = 7.5$  Hz, 3H).  $^{13}\text{C}$  NMR (125 MHz,  $\text{CDCl}_3$ )  $\delta$  178.2, 154.4, 151.6, 144.1, 139.8, 131.8, 128.5, 128.1, 127.3, 127.2, 125.2, 122.1, 113.0, 108.0, 105.6, 57.2, 33.8, 30.6, 26.2, 25.6, 22.5, 21.1, 13.9, 12.2. **IR** (neat,  $\text{cm}^{-1}$ ):  $\nu$  3055, 3028, 2957, 2928, 2871, 1710, 1611, 1494, 1469, 1373, 1347, 1254, 1186, 1080, 947, 811, 752, 697. **HRMS** (ESI):  $m/z$  calcd for  $\text{C}_{26}\text{H}_{29}\text{NO}_2 + \text{H}^+$ : 388.2271  $[\text{M} + \text{H}]^+$ ; found: 388.2267.

## 8) Mechanistic studies

### Synthesis of 6, 7, 3aa-Pd, 8

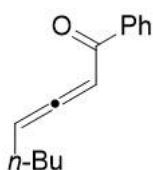

#### Phenyllocta-2,3-dien-1-one (6):

Prepared according to literature procedure.<sup>1</sup>

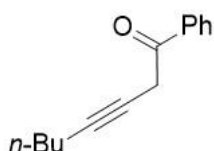

#### Phenylloct-3-yn-1-one (7):

Prepared according to literature procedure.<sup>1</sup>

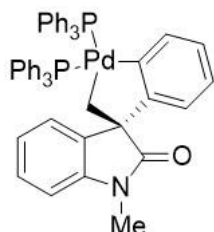

#### Palladacycle 3aa-Pd:

Prepared according to literature procedure.<sup>2a</sup>

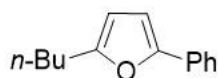

#### 2-butyl-5-phenylfuran (8):

Prepared according to literature procedure.<sup>1</sup>

### Confirmation of (*E*)-2a as a precursor in the spirocyclizations

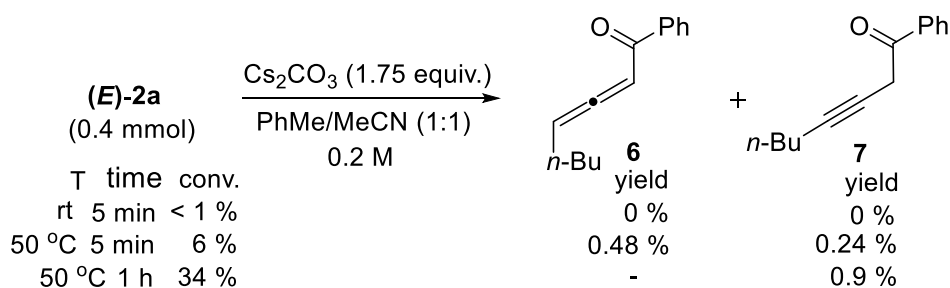

To three flame-dried, 3-dram vial charged with (*E*)- $\beta$ -chloroenone **2a** (94.5 mg, 0.4 mmol, 1.0 equiv.) under argon were added dry PhMe/MeCN (1:1, 2.0 mL) and Cs<sub>2</sub>CO<sub>3</sub> (228.1 mg, 0.7 mmol, 1.75 equiv.), respectively. The three vials were stirred at: (1) room temperature, 5 minutes; (2) 50 °C, 5 minutes; (3) 50 °C, 1h. The reactions were each passed through a pad of silica gel washing with EtOAc. The filtrates were concentrated under reduced pressure and the residue were purified by silica gel flash column chromatography using 20:1 Pentanes: Et<sub>2</sub>O v:v as the mobile phase. The conversions of (*E*)-**2a**, the yields of **6** and **7** were determined by <sup>1</sup>H NMR analysis of the purified mixture of (*E*)-**2a**, **6**, and **7**.

## Spirocyclizations synthesized from allenyl ketone **6**, alkynyl ketone **7**

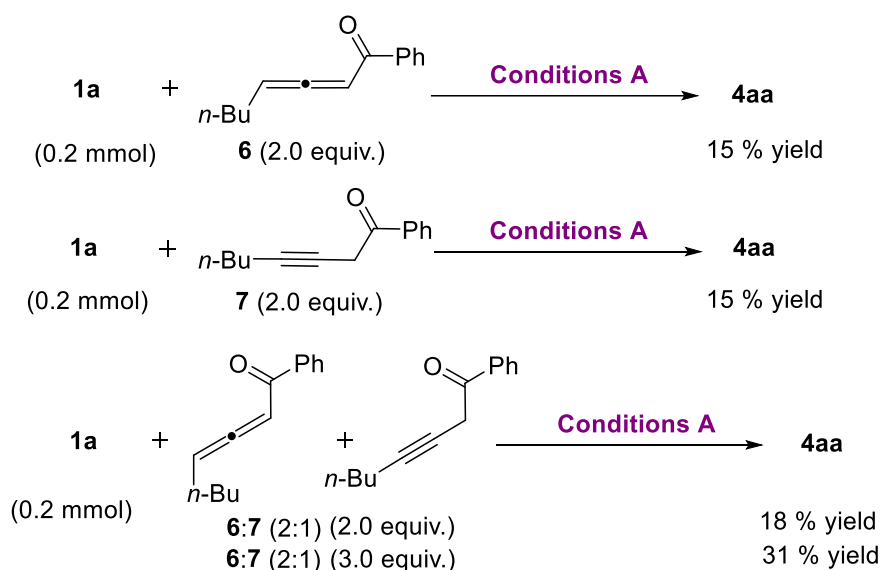

A flame-dried, 3-dram vial under argon atmosphere was charged with a stir bar, acrylamide **1a** (72.6 mg, 0.20 mmol, 1.0 equiv.), Pd<sub>2</sub>(dba)<sub>3</sub> (9.2 mg, 0.01 mmol, 5 mol %), PPh<sub>3</sub> (10.5 mg, 0.04 mmol, 20 mol %) and Cs<sub>2</sub>CO<sub>3</sub> (228.1 mg, 0.7 mmol, 3.5 equiv.), and was purged with argon for 5 minutes. Anhydrous and degassed PhMe (0.5 mL) and MeCN (0.5 mL) were added and the mixture was stirred at room temperature for 5 minutes. Allenyl ketone **6** (80mg, 0.4 mmol, 2.0 equiv.) or alkynyl ketone **7** (80mg, 0.4 mmol, 2.0 equiv.), or the mixture of **6** and **7** (80mg, 0.4 mmol, 2.0 equiv.) was dissolved in anhydrous PhMe: MeCN (1:1) (1.0 mL) and transferred to the vial via syringe, and the vial was then purged with argon for 5 minutes. A Teflon lined screw cap was fitted on the 3-dram vial. The vial was sealed with Teflon tape and placed in a preheated oil bath at 100 °C for 24 hours. The reaction mixture was then cooled down to room temperature and was filtered through a plug of silica gel using EtOAc. The filtrate was concentrated under reduced pressure and the residue was purified by silica gel flash column chromatography using 5:1 Pentanes: Et<sub>2</sub>O v:v as the mobile phase, affording the corresponding product **4aa** in 15 % (13.1 mg), 15 % (12.7 mg), 18 % (15.7 mg), 31 % (27 mg) yields.

## Palladacycle as an intermediate in the spirocyclizations

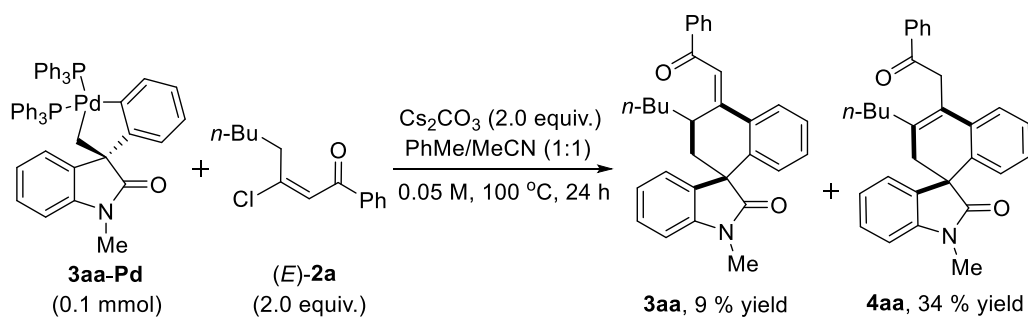

A flame-dried, 3-dram vial under argon atmosphere was charged with a stir bar, palladacycle **3aa-Pd** (86.5 mg, 0.10 mmol, 1.0 equiv.), and Cs<sub>2</sub>CO<sub>3</sub> (65.2 mg, 0.2 mmol, 2.0 equiv.), and was purged with argon for 5 minutes. Anhydrous and degassed PhMe

(0.5 mL) and MeCN (0.5 mL) were added and the mixture was stirred at room temperature for 5 minutes. (*E*)- $\beta$ -chloroenone **2a** (47.2 mg, 0.2 mmol, 2.0 equiv.) was dissolved in anhydrous PhMe: MeCN (1:1) (1.0 mL) and transferred to the vial via syringe, and the vial was then purged with argon for 5 minutes. A Teflon lined screw cap was fitted on the 3-dram vial. The vial was sealed with Teflon tape and placed in a preheated oil bath at 100 °C for 24 hours. The reaction mixture was then cooled down to room temperature and was filtered through a plug of silica gel using EtOAc. The filtrate was concentrated under reduced pressure and the residue was purified by silica gel flash column chromatography using 5:1 Pentanes: Et<sub>2</sub>O v:v as the mobile phase. Obtained 4 mg of **3aa** (9 % yield) and 14.8 mg of **4aa** (34 % yield).

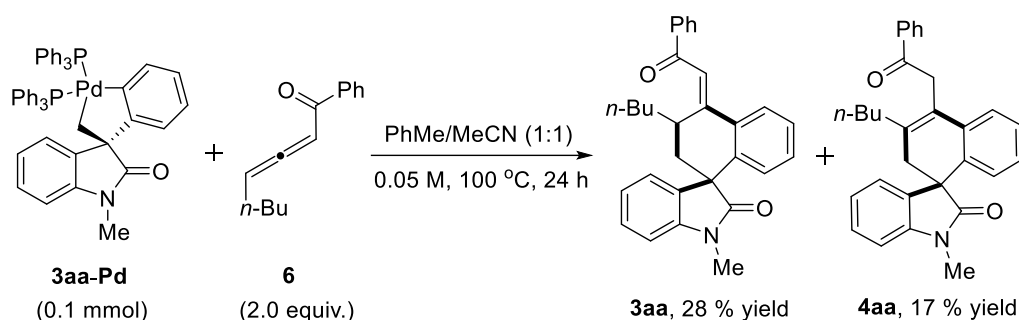

A flame-dried, 3-dram vial under argon atmosphere was charged with a stir bar, palladacycle **3aa-Pd** (86.5 mg, 0.10 mmol, 1.0 equiv.), and was purged with argon for 5 minutes. Anhydrous and degassed PhMe (0.5 mL) and MeCN (0.5 mL) were added and the mixture was stirred at room temperature for 5 minutes. Allenyl ketone **6** (40 mg, 0.2 mmol, 2.0 equiv.) was dissolved in anhydrous PhMe: MeCN (1:1) (1.0 mL) and transferred to the vial via syringe, and the vial was then purged with argon for 5 minutes. A Teflon lined screw cap was fitted on the 3-dram vial. The vial was sealed with Teflon tape and placed in a preheated oil bath at 100 °C for 24 hours. The reaction mixture was then cooled down to room temperature and was filtered through a plug of silica gel using EtOAc. The filtrate was concentrated under reduced pressure and the residue was purified by silica gel flash column chromatography using 5:1 Pentanes: Et<sub>2</sub>O v:v as the mobile phase. Obtained 12.2 mg of **3aa** (28 % yield) and 7.4 mg of **4aa** (17 % yield).

### Confirmation of (*E*)-**2a** as a precursor in the cascade cyclizations

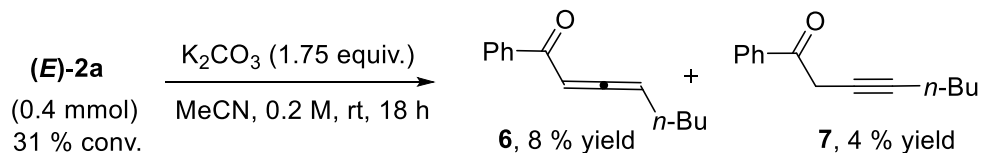

To a flame-dried, 3-dram vial charged with (*E*)- $\beta$ -chloroenone **2a** (94.5 mg, 0.4 mmol, 1.0 equiv.) under argon were added dry MeCN (2.0 mL) and K<sub>2</sub>CO<sub>3</sub> (96.7 mg, 0.7 mmol, 1.75 equiv.) at ambient temperature. The solution was stirred for 18 h and concentrated under reduced pressure. The crude product was purified by silica gel flash column chromatography using 20:1 Pentanes: Et<sub>2</sub>O v:v as the mobile phase, affording the mixture of allenyl ketone **6** and alkynyl ketone **7** in 12 % yield. The ratio of **6/7** was analyzed by <sup>1</sup>H NMR spectroscopy.

### Determining whether the cycloisomerized furan of (*E*)-2a was a catalytically active intermediate

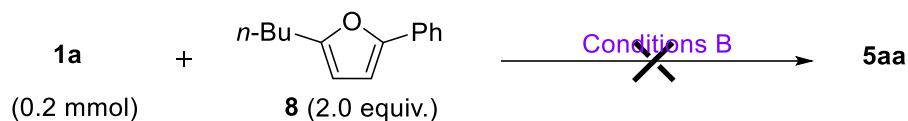

A flame-dried, 3-dram vial under argon atmosphere was charged with a stir bar, acrylamide **1a** (72.6 mg, 0.20 mmol, 1.0 equiv.), Pd<sub>2</sub>(dba)<sub>3</sub> (9.2 mg, 0.01 mmol, 5 mol %), PPh<sub>3</sub> (10.5 mg, 0.04 mmol, 20 mol %) and K<sub>2</sub>CO<sub>3</sub> (96.7 mg, 0.7 mmol, 3.5 equiv.), and was purged with argon for 5 minutes. Anhydrous and degassed MeCN (1.0 mL) were added and the mixture was stirred at room temperature for 5 minutes. 2-Butyl-5-phenylfuran **8** (80 mg, 0.4 mmol, 2.0 equiv.) was dissolved in anhydrous MeCN (1.0 mL) and transferred to the vial via syringe, and the vial was then purged with argon for 5 minutes. A Teflon lined screw cap was fitted on the 3-dram vial. The vial was sealed with Teflon tape and placed in a preheated oil bath at 100 °C for 24 hours. The reaction mixture was then cooled down to room temperature and was monitored, no corresponding product **5aa** was obtained.

### Cascade cyclizations synthesized from allenyl ketone **6**, alkynyl ketone **7**

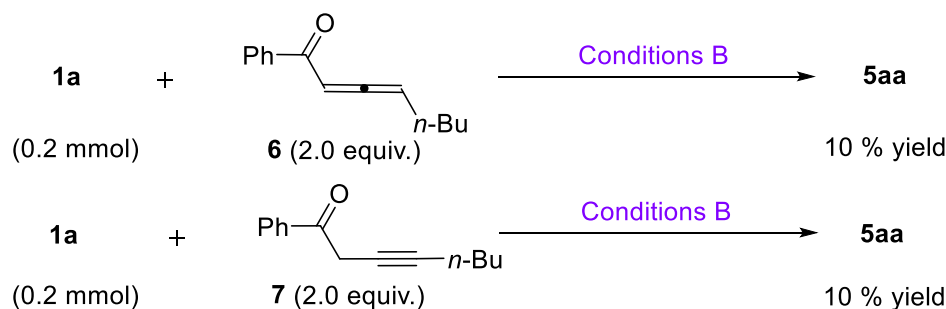

A flame-dried, 3-dram vial under argon atmosphere was charged with a stir bar, acrylamide **1a** (72.6 mg, 0.20 mmol, 1.0 equiv.), Pd<sub>2</sub>(dba)<sub>3</sub> (9.2 mg, 0.01 mmol, 5 mol %), PPh<sub>3</sub> (10.5 mg, 0.04 mmol, 20 mol %) and K<sub>2</sub>CO<sub>3</sub> (96.7 mg, 0.7 mmol, 3.5 equiv.), and was purged with argon for 5 minutes. Anhydrous and degassed MeCN (1.0 mL) were added and the mixture was stirred at room temperature for 5 minutes. Allenyl ketone **6** (80 mg, 0.4 mmol, 2.0 equiv.) or alkynyl ketone **7** (80 mg, 0.4 mmol, 2.0 equiv.) was dissolved in anhydrous MeCN (1.0 mL) and transferred to the vial via syringe, and the vial was then purged with argon for 5 minutes. A Teflon lined screw cap was fitted on the 3-dram vial. The vial was sealed with Teflon tape and placed in a preheated oil bath at 100 °C for 24 hours. The reaction mixture was then cooled down to room temperature and was filtered through a plug of silica gel using EtOAc. The filtrate was concentrated under reduced pressure and the residue was purified by silica gel flash column chromatography using 15:1 Pentanes: Et<sub>2</sub>O v:v as the mobile phase, affording the corresponding product **5aa** in 10 % (9.1 mg), 10 % (8.5 mg) yield, respectively.

**Cascade cyclizations employing allenyl ketone **6** and alkynyl ketone **7** without or with additives**

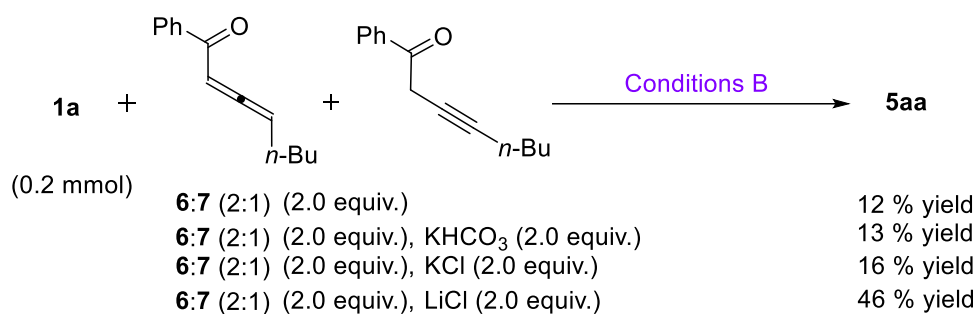

A flame-dried, 3-dram vial under argon atmosphere was charged with a stir bar, acrylamide **1a** (72.6 mg, 0.20 mmol, 1.0 equiv.), Pd<sub>2</sub>(dba)<sub>3</sub> (9.2 mg, 0.01 mmol, 5 mol %), PPh<sub>3</sub> (10.5 mg, 0.04 mmol, 20 mol %), K<sub>2</sub>CO<sub>3</sub> (96.7 mg, 0.7 mmol, 3.5 equiv.) and additive (0.40 mmol, 2.0 equiv.), and was purged with argon for 5 minutes. Anhydrous and degassed MeCN (1.0 mL) were added and the mixture was stirred at room temperature for 5 minutes. The mixture of allenyl ketone **6** and alkynyl ketone **7** (80 mg, 0.4 mmol, 2.0 equiv.) was dissolved in anhydrous MeCN (1.0 mL) and transferred to the vial via syringe, and the vial was then purged with argon for 5 minutes. A Teflon lined screw cap was fitted on the 3-dram vial. The vial was sealed with Teflon tape and placed in a preheated oil bath at 100 °C for 24 hours. The reaction mixture was then cooled down to room temperature and was filtered through a plug of silica gel using EtOAc. The filtrate was concentrated under reduced pressure and the residue was purified by silica gel flash column chromatography using 15:1 Pentanes: Et<sub>2</sub>O v:v as the mobile phase, affording the corresponding product **5aa** in 12 % (10.4 mg), 13 % (11.3 mg), 16 % (13.9 mg), 46 % (40 mg) yields.

## 9) Scale up and product derivatization experiments

### Scale up

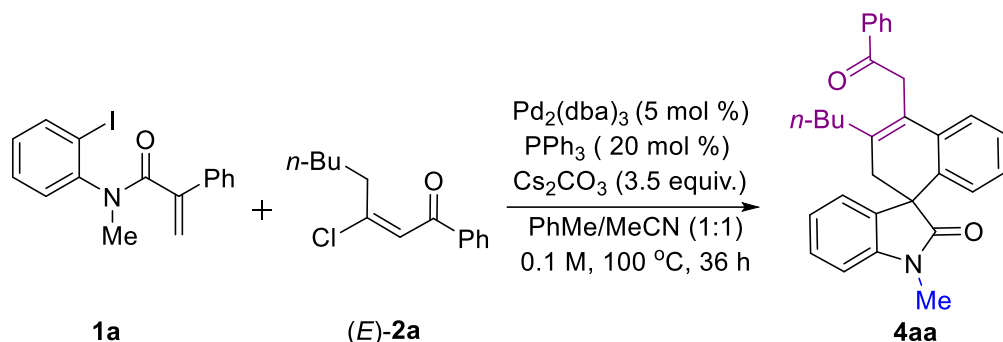

A flame-dried, 9.5-dram vial under argon atmosphere was charged with a stir bar, acrylamide **1a** (363 mg, 1.0 mmol, 1.0 equiv.), Pd<sub>2</sub>(dba)<sub>3</sub> (46 mg, 0.05 mmol, 5 mol %), PPh<sub>3</sub> (53 mg, 0.2 mmol, 20 mol %) and Cs<sub>2</sub>CO<sub>3</sub> (1.14 g, 3.5 mmol, 3.5 equiv.), and was purged with argon for 10 minutes. Anhydrous and degassed PhMe (3.0 mL) and MeCN (3.0 mL) were added and the mixture was stirred at room temperature for 10 minutes. β-chloroenone (*E*)-**2a** (472 mg, 2.0 mmol, 2.0 equiv.) was dissolved in anhydrous PhMe: MeCN (1:1) (4.0 mL) and transferred to the vial via syringe, and the vial was then purged with argon for 5 minutes. A Teflon lined screw cap was fitted on the 9.5-dram vial. The vial was sealed with Teflon tape and placed in a preheated oil bath at 100 °C for 36 hours. The reaction mixture was then cooled down to room temperature and was filtered through a plug of silica gel using EtOAc. The filtrate was concentrated under reduced pressure and the residue was purified by silica gel flash column chromatography using the indicated mobile phase.

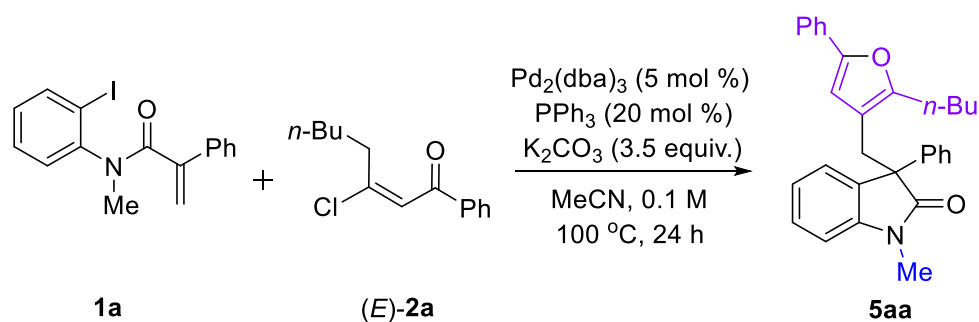

A flame-dried, 9.5-dram vial under argon atmosphere was charged with acrylamide **1a** (363 mg, 1.0 mmol, 1.0 equiv.), Pd<sub>2</sub>(dba)<sub>3</sub> (46 mg, 0.05 mmol, 5 mol %), PPh<sub>3</sub> (53 mg, 0.2 mmol, 20 mol %) and K<sub>2</sub>CO<sub>3</sub> (484 mg, 3.5 mmol, 3.5 equiv.), and was purged with argon for 10 minutes. Anhydrous and degassed MeCN (6.0 mL) were added and the mixture was stirred at room temperature for 10 minutes. β-chloroenone (*E*)-**2a** (472 mg, 2.0 mmol, 2.0 equiv.) was dissolved in anhydrous MeCN (4.0 mL) and transferred to the vial via syringe, and the vial was then purged with argon for 5 minutes. A Teflon lined screw cap was fitted on the 9.5-dram vial. The vial was sealed with Teflon tape and placed in a preheated oil bath at 100 °C for 24 hours. The reaction mixture was then



cooled down to room temperature and was filtered through a plug of silica gel using EtOAc. The filtrate was concentrated under reduced pressure and the residue was purified by silica gel flash column chromatography using the indicated mobile phase.

### Product derivatization experiments

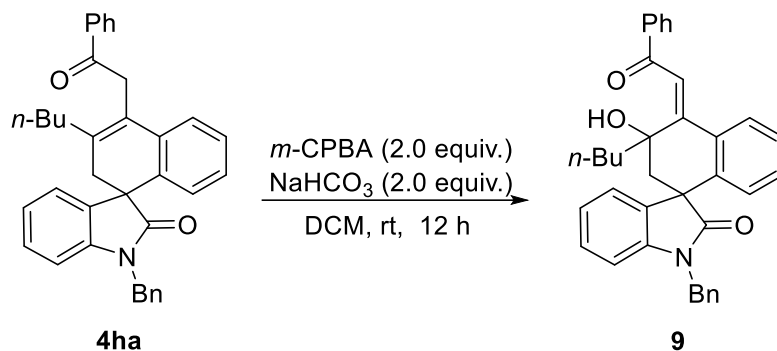

*m*-CPBA (51.8 mg, 0.3 mmol, 2.0 equiv) and NaHCO<sub>3</sub> (25.3 mg, 0.3 mmol, 2.0 equiv.) were dissolved in 5.0 mL dichloromethane at room temperature and stirred for 5 min. Spirooxindole **4ha** (76.8 mg, 0.15 mmol) was added and the mixture was stirred at room temperature for 12 h. The reaction mixture was concentrated and purified by silica gel column chromatography using the specified solvent.

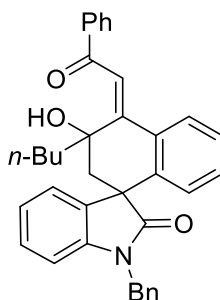

### **(Z)-1-benzyl-3'-butyl-3'-hydroxy-4'-(2-oxo-2-phenylethylidene)-3',4'-dihydro-2'*H*-spiro[indoline-3,1'-naphthalen]-2-one (9)**

The crude material was purified via silica-gel flash chromatography using 8:1 Pentanes: EtOAc v:v as the mobile phase. The title compound was obtained as a pale yellow solid (61.7 mg, 0.12 mmol, 78 % yield, MP = 182-183 °C).

<sup>1</sup>H NMR (500 MHz, CDCl<sub>3</sub>) δ 7.97 (d, *J* = 7.5 Hz, 2H), 7.33 (t, *J* = 7.0 Hz, 2H), 7.31-7.26 (m, 5H), 7.22 (d, *J* = 8.0 Hz, 1H), 7.15-7.10 (m, 3H), 7.07 (d, *J* = 7.0 Hz, 1H), 6.98 (s, 1H), 6.92 (td, *J*<sub>1</sub> = 7.5 Hz, *J*<sub>2</sub> = 1.0 Hz, 1H), 6.87 (d, *J* = 8.0 Hz, 1H), 6.84 (td, *J*<sub>1</sub> = 7.5 Hz, *J*<sub>2</sub> = 1.0 Hz, 1H), 6.47 (d, *J* = 7.5 Hz, 1H), 5.08 (d, *J* = 16.0 Hz, 1H), 4.85 (d, *J* = 15.5 Hz, 1H), 4.67 (s, 1H), 2.43 (d, *J* = 14.5 Hz, 1H), 2.35 (d, *J* = 14.5 Hz, 1H), 2.02-1.94 (m, 1H), 1.91-1.84 (m, 1H), 1.51-1.43 (m, 1H), 1.41-1.33 (m, 3H), 0.91 (t, *J* = 7.0 Hz, 3H). <sup>13</sup>C NMR (125 MHz, CDCl<sub>3</sub>) δ 198.2, 179.8, 153.8, 142.7, 137.4, 137.1, 135.5, 134.4, 132.5, 132.4, 130.9, 129.4, 129.0, 128.9, 128.8, 127.9, 127.8, 127.2, 127.1, 125.8, 125.6, 124.3, 123.6, 109.6, 73.6, 52.2, 44.7, 44.1, 43.9, 26.2, 23.1, 14.0. IR (neat, cm<sup>-1</sup>): ν 3444, 3062, 3033, 3005, 2959, 2924, 2856, 1681, 1633, 1490, 1467, 1371, 1349, 1268, 1216, 1174, 1082, 954, 855, 779, 745, 693. HRMS (ESI): *m/z* calcd for

C<sub>36</sub>H<sub>33</sub>NO<sub>3</sub>+H<sup>+</sup>: 528.2533 [M+H]<sup>+</sup>; found: 528.2538.

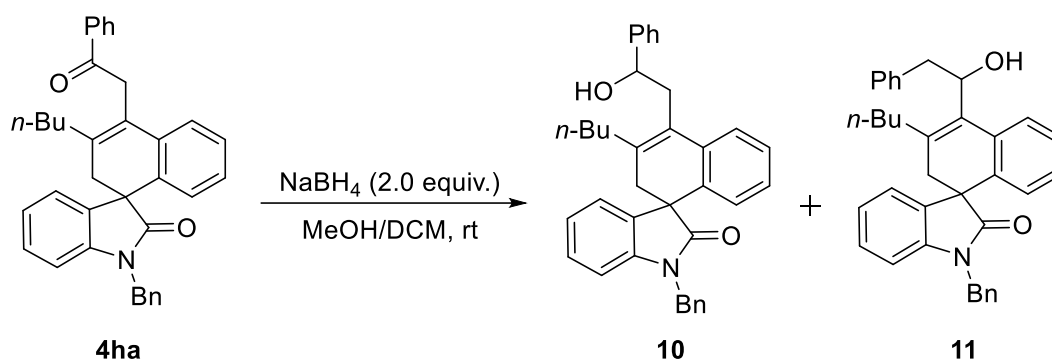

A solution of **4ha** (204.8 mg, 0.4 mmol) in 4.0 mL MeOH and 2.0 mL DCM was cooled to 0 °C, and then NaBH<sub>4</sub> (30.3 mg, 0.8 mmol) was added successively. The reaction mixture was stirred at 0 °C until the complete consumption of **4ha** as monitored by thin layer chromatography. Then, saturated aq. NH<sub>4</sub>Cl solution was added. The mixture was extracted with CH<sub>2</sub>Cl<sub>2</sub>. The combined organic phase was dried over MgSO<sub>4</sub>, filtered, concentrated and purified by silica gel column chromatography using the specified solvent.

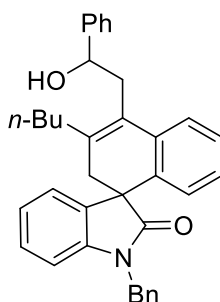

**1-Benzyl-3'-butyl-4'-(2-hydroxy-2-phenylethyl)-2'H-spiro[indoline-3,1'-naphthalen]-2-one (10)**

The crude material was purified via silica-gel flash chromatography using 5:1 Pentanes: EtOAc v:v as the mobile phase. The title compound was obtained as a pale yellow solid (67.7 mg, 0.13 mmol, 33 % yield, MP = 65-67 °C).

<sup>1</sup>H NMR (500 MHz, CDCl<sub>3</sub>) δ 7.60-7.56 (m, 3H), 7.42 (t, *J* = 7.5 Hz, 2H), 7.37 (td, *J*<sub>1</sub> = 7.5 Hz, *J*<sub>2</sub> = 1.0 Hz, 1H), 7.33-7.25 (m, 8H), 7.14 (td, *J*<sub>1</sub> = 7.5 Hz, *J*<sub>2</sub> = 0.5 Hz, 1H), 7.09 (td, *J*<sub>1</sub> = 7.5 Hz, *J*<sub>2</sub> = 1.0 Hz, 1H), 6.86 (d, *J* = 8.0 Hz, 1H), 6.71 (dd, *J*<sub>1</sub> = 7.5 Hz, *J*<sub>2</sub> = 1.0 Hz, 1H), 4.97-4.93 (m, 1H), 4.94 (d, *J* = 15.5 Hz, 1H), 4.83 (d, *J* = 15.5 Hz, 1H), 3.17-3.03 (m, 2H), 3.11 (d, *J* = 16.5 Hz, 1H), 2.47-2.35 (m, 2H), 2.43 (d, *J* = 16.5 Hz, 1H), 1.71-1.61 (m, 1H), 1.46-1.34 (m, 3H), 0.94 (t, *J* = 7.0 Hz, 3H). <sup>13</sup>C NMR (125 MHz, CDCl<sub>3</sub>) δ 177.5, 144.8, 142.7, 136.0, 135.8, 135.8, 135.0, 133.2, 128.7, 128.3, 128.3, 128.2, 127.6, 127.5, 127.3, 126.9, 126.8, 126.1, 125.6, 124.4, 124.3, 123.1, 109.3, 70.6, 51.4, 43.6, 39.7, 38.5, 34.3, 30.1, 23.0, 14.0. IR (neat, cm<sup>-1</sup>): ν 3433, 3087, 3061, 3028, 2956, 2927, 2859, 2245, 1693, 1611, 1484, 1454, 1435, 1378, 1359, 1346, 1301, 1270, 1239, 1200, 1169, 1104, 1080, 1053, 1028, 1012, 976, 946, 908, 873, 729, 699, 670, 647, 633, 611. HRMS (ESI): *m/z* calcd for C<sub>36</sub>H<sub>35</sub>NO<sub>2</sub>+H<sup>+</sup>: 514.2741 [M+H]<sup>+</sup>; found: 514.2754.

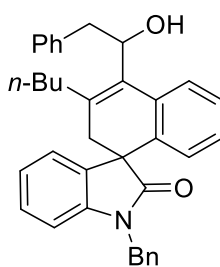

**1-benzyl-3'-butyl-4'-(1-hydroxy-2-phenylethyl)-2'*H*-spiro[indoline-3,1'-naphthalen]-2-one (11)**

The crude material was purified via silica-gel flash chromatography using 5:1 Pentanes: EtOAc v:v as the mobile phase. The title compound was obtained as a pale yellow solid (128.6 mg, 0.25 mmol, 63 % yield, MP = 61-63 °C).

**<sup>1</sup>H NMR** (500 MHz, CDCl<sub>3</sub>) δ 7.56 (d, *J* = 7.0 Hz, 1H), 7.54 (d, *J* = 7.0 Hz, 2H), 7.45 (d, *J* = 7.5 Hz, 1H), 7.41 (t, *J* = 7.5 Hz, 2H), 7.39-7.35 (m, 4H), 7.34-7.30 (m, 2H), 7.29 (d, *J* = 8.0 Hz, 1H), 7.22 (t, *J* = 7.8 Hz, 1H), 7.08 (t, *J* = 7.5 Hz, 1H), 7.02 (t, *J* = 7.5 Hz, 1H), 6.86 (d, *J* = 7.5 Hz, 1H), 6.80 (d, *J* = 7.5 Hz, 1H), 5.16-5.12 (m, 1H), 5.02 (d, *J* = 14.5 Hz, 1H), 4.99 (d, *J* = 14.5 Hz, 1H), 3.23-3.10 (m, 2H), 2.88 (d, *J* = 16.5 Hz, 1H), 2.74 (d, *J* = 16.5 Hz, 1H), 2.46-2.34 (m, 2H), 1.55-1.36 (m, 4H), 0.96 (t, *J* = 7.3 Hz, 3H). **<sup>13</sup>C NMR** (125 MHz, CDCl<sub>3</sub>) δ 179.1, 144.9, 141.6, 136.6, 135.9, 134.7, 134.5, 133.6, 128.7, 128.3, 128.1, 127.9, 127.7, 127.6, 127.3, 127.1, 126.7, 125.6, 125.5, 124.6, 124.1, 122.9, 109.2, 73.5, 52.0, 43.7, 38.8, 37.7, 34.1, 29.6, 22.8, 13.9. **IR** (neat, cm<sup>-1</sup>): ν 3434, 3034, 3059, 3029, 2954, 2925, 2862, 1692, 1607, 1486, 1461, 1348, 1301, 1200, 1169, 1081, 1046, 1029, 941, 908, 869, 749, 729, 697, 650, 608. **HRMS** (ESI): *m/z* calcd for C<sub>36</sub>H<sub>35</sub>NO<sub>2</sub>+Na<sup>+</sup>: 526.2560 [M+Na]<sup>+</sup>; found: 536.2565.

## 10) X-Ray Crystal Structure

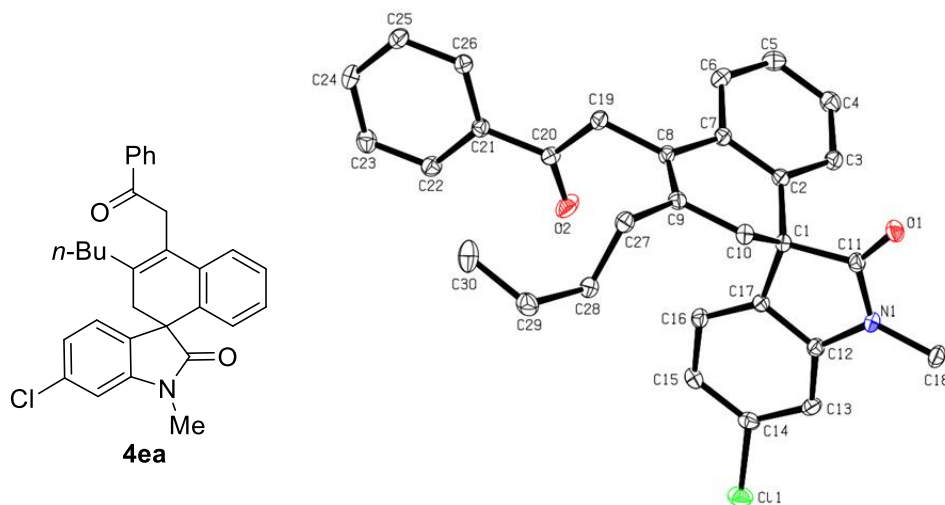

### Product 4ea CCDC 2179947

**Table S3.** Crystal data and structure refinement for d18163\_a.

|                                 |                                                     |                  |
|---------------------------------|-----------------------------------------------------|------------------|
| Identification code             | d18163_a                                            |                  |
| Empirical formula               | C <sub>30</sub> H <sub>28</sub> Cl N O <sub>2</sub> |                  |
| Formula weight                  | 469.98                                              |                  |
| Temperature                     | 150(2) K                                            |                  |
| Wavelength                      | 0.71073 Å                                           |                  |
| Crystal system                  | Monoclinic                                          |                  |
| Space group                     | C2/c                                                |                  |
| Unit cell dimensions            | a = 24.9121(14) Å                                   | α = 90°.         |
|                                 | b = 12.9260(8) Å                                    | β = 105.923(2)°. |
|                                 | c = 15.4180(8) Å                                    | γ = 90°.         |
| Volume                          | 4774.3(5) Å <sup>3</sup>                            |                  |
| Z                               | 8                                                   |                  |
| Density (calculated)            | 1.308 Mg/m <sup>3</sup>                             |                  |
| Absorption coefficient          | 0.189 mm <sup>-1</sup>                              |                  |
| F(000)                          | 1984                                                |                  |
| Crystal size                    | 0.290 x 0.200 x 0.100 mm <sup>3</sup>               |                  |
| Theta range for data collection | 1.700 to 27.560°.                                   |                  |
| Index ranges                    | -31 ≤ h ≤ 32, -16 ≤ k ≤ 16, -20 ≤ l ≤ 19            |                  |
| Reflections collected           | 45414                                               |                  |
| Independent reflections         | 5513 [R(int) = 0.0502]                              |                  |
| Completeness to theta = 25.242° | 100.0 %                                             |                  |
| Absorption correction           | Semi-empirical from equivalents                     |                  |
| Max. and min. transmission      | 0.7456 and 0.6962                                   |                  |

|                                   |                                             |
|-----------------------------------|---------------------------------------------|
| Refinement method                 | Full-matrix least-squares on F <sup>2</sup> |
| Data / restraints / parameters    | 5513 / 0 / 317                              |
| Goodness-of-fit on F <sup>2</sup> | 1.008                                       |
| Final R indices [I>2sigma(I)]     | R1 = 0.0403, wR2 = 0.0897                   |
| R indices (all data)              | R1 = 0.0752, wR2 = 0.1071                   |
| Extinction coefficient            | n/a                                         |
| Largest diff. peak and hole       | 0.290 and -0.323 e.Å <sup>-3</sup>          |

**Table S4.** Atomic coordinates ( $\times 10^4$ ) and equivalent isotropic displacement parameters ( $\text{\AA}^2 \times 10^3$ ) for d18163\_a. U(eq) is defined as one third of the trace of the orthogonalized  $U^{ij}$  tensor.

|       | x       | y        | z       | U(eq) |
|-------|---------|----------|---------|-------|
| Cl(1) | 4789(1) | 8705(1)  | 4667(1) | 36(1) |
| O(1)  | 6662(1) | 9209(1)  | 1704(1) | 30(1) |
| O(2)  | 6444(1) | 4666(1)  | 4054(1) | 41(1) |
| N(1)  | 6070(1) | 9459(1)  | 2593(1) | 24(1) |
| C(1)  | 6452(1) | 7778(1)  | 2614(1) | 21(1) |
| C(2)  | 7037(1) | 7524(1)  | 3191(1) | 21(1) |
| C(3)  | 7383(1) | 8296(1)  | 3675(1) | 25(1) |
| C(4)  | 7907(1) | 8064(2)  | 4238(1) | 29(1) |
| C(5)  | 8091(1) | 7050(2)  | 4302(1) | 30(1) |
| C(6)  | 7750(1) | 6275(1)  | 3825(1) | 27(1) |
| C(7)  | 7216(1) | 6486(1)  | 3265(1) | 22(1) |
| C(8)  | 6851(1) | 5663(1)  | 2742(1) | 22(1) |
| C(9)  | 6414(1) | 5921(1)  | 2046(1) | 23(1) |
| C(10) | 6283(1) | 7038(1)  | 1804(1) | 24(1) |
| C(11) | 6422(1) | 8889(1)  | 2241(1) | 24(1) |
| C(12) | 5837(1) | 8846(1)  | 3148(1) | 23(1) |
| C(13) | 5462(1) | 9143(1)  | 3617(1) | 26(1) |
| C(14) | 5282(1) | 8375(1)  | 4102(1) | 26(1) |
| C(15) | 5475(1) | 7368(1)  | 4145(1) | 26(1) |
| C(16) | 5862(1) | 7090(1)  | 3679(1) | 24(1) |
| C(17) | 6040(1) | 7832(1)  | 3175(1) | 22(1) |
| C(18) | 5930(1) | 10533(1) | 2341(1) | 31(1) |
| C(19) | 6988(1) | 4546(1)  | 2997(1) | 26(1) |
| C(20) | 6718(1) | 4121(1)  | 3692(1) | 24(1) |
| C(21) | 6795(1) | 2992(1)  | 3914(1) | 22(1) |
| C(22) | 6469(1) | 2540(1)  | 4416(1) | 27(1) |
| C(23) | 6542(1) | 1507(1)  | 4664(1) | 32(1) |
| C(24) | 6943(1) | 923(1)   | 4419(1) | 30(1) |
| C(25) | 7265(1) | 1360(1)  | 3914(1) | 32(1) |
| C(26) | 7188(1) | 2392(1)  | 3658(1) | 28(1) |
| C(27) | 6019(1) | 5156(1)  | 1454(1) | 28(1) |
| C(28) | 5491(1) | 4994(1)  | 1764(1) | 28(1) |
| C(29) | 5132(1) | 4090(2)  | 1294(1) | 36(1) |
| C(30) | 5398(1) | 3043(2)  | 1595(2) | 51(1) |

**Table S5.** Bond lengths [Å] and angles [°] for d18163\_a.

---

|              |            |
|--------------|------------|
| Cl(1)-C(14)  | 1.7440(18) |
| O(1)-C(11)   | 1.217(2)   |
| O(2)-C(20)   | 1.218(2)   |
| N(1)-C(11)   | 1.367(2)   |
| N(1)-C(12)   | 1.404(2)   |
| N(1)-C(18)   | 1.458(2)   |
| C(1)-C(17)   | 1.514(2)   |
| C(1)-C(2)    | 1.521(2)   |
| C(1)-C(10)   | 1.538(2)   |
| C(1)-C(11)   | 1.541(2)   |
| C(2)-C(3)    | 1.393(2)   |
| C(2)-C(7)    | 1.408(2)   |
| C(3)-C(4)    | 1.388(2)   |
| C(3)-H(3A)   | 0.9500     |
| C(4)-C(5)    | 1.383(3)   |
| C(4)-H(4A)   | 0.9500     |
| C(5)-C(6)    | 1.387(3)   |
| C(5)-H(5A)   | 0.9500     |
| C(6)-C(7)    | 1.401(2)   |
| C(6)-H(6A)   | 0.9500     |
| C(7)-C(8)    | 1.485(2)   |
| C(8)-C(9)    | 1.345(2)   |
| C(8)-C(19)   | 1.511(2)   |
| C(9)-C(10)   | 1.504(2)   |
| C(9)-C(27)   | 1.511(2)   |
| C(10)-H(10A) | 0.9900     |
| C(10)-H(10B) | 0.9900     |
| C(12)-C(13)  | 1.384(2)   |
| C(12)-C(17)  | 1.402(2)   |
| C(13)-C(14)  | 1.389(2)   |
| C(13)-H(13A) | 0.9500     |
| C(14)-C(15)  | 1.383(2)   |
| C(15)-C(16)  | 1.398(2)   |
| C(15)-H(15A) | 0.9500     |
| C(16)-C(17)  | 1.382(2)   |
| C(16)-H(16A) | 0.9500     |

|                  |            |
|------------------|------------|
| C(18)-H(18A)     | 0.9800     |
| C(18)-H(18B)     | 0.9800     |
| C(18)-H(18C)     | 0.9800     |
| C(19)-C(20)      | 1.516(2)   |
| C(19)-H(19A)     | 0.97(2)    |
| C(19)-H(19B)     | 0.96(2)    |
| C(20)-C(21)      | 1.499(2)   |
| C(21)-C(26)      | 1.389(2)   |
| C(21)-C(22)      | 1.394(2)   |
| C(22)-C(23)      | 1.386(3)   |
| C(22)-H(22A)     | 0.9500     |
| C(23)-C(24)      | 1.386(3)   |
| C(23)-H(23A)     | 0.9500     |
| C(24)-C(25)      | 1.382(3)   |
| C(24)-H(24A)     | 0.9500     |
| C(25)-C(26)      | 1.390(2)   |
| C(25)-H(25A)     | 0.9500     |
| C(26)-H(26A)     | 0.9500     |
| C(27)-C(28)      | 1.532(3)   |
| C(27)-H(27A)     | 0.9900     |
| C(27)-H(27B)     | 0.9900     |
| C(28)-C(29)      | 1.529(2)   |
| C(28)-H(28A)     | 0.9900     |
| C(28)-H(28B)     | 0.9900     |
| C(29)-C(30)      | 1.523(3)   |
| C(29)-H(29A)     | 0.9900     |
| C(29)-H(29B)     | 0.9900     |
| C(30)-H(30A)     | 0.9800     |
| C(30)-H(30B)     | 0.9800     |
| C(30)-H(30C)     | 0.9800     |
|                  |            |
| C(11)-N(1)-C(12) | 110.81(14) |
| C(11)-N(1)-C(18) | 122.76(14) |
| C(12)-N(1)-C(18) | 126.21(15) |
| C(17)-C(1)-C(2)  | 111.48(13) |
| C(17)-C(1)-C(10) | 114.55(13) |
| C(2)-C(1)-C(10)  | 110.21(14) |
| C(17)-C(1)-C(11) | 101.53(13) |



|                     |            |
|---------------------|------------|
| C(2)-C(1)-C(11)     | 111.10(13) |
| C(10)-C(1)-C(11)    | 107.61(13) |
| C(3)-C(2)-C(7)      | 120.24(16) |
| C(3)-C(2)-C(1)      | 120.76(15) |
| C(7)-C(2)-C(1)      | 118.92(15) |
| C(4)-C(3)-C(2)      | 121.23(16) |
| C(4)-C(3)-H(3A)     | 119.4      |
| C(2)-C(3)-H(3A)     | 119.4      |
| C(5)-C(4)-C(3)      | 118.97(17) |
| C(5)-C(4)-H(4A)     | 120.5      |
| C(3)-C(4)-H(4A)     | 120.5      |
| C(4)-C(5)-C(6)      | 120.34(17) |
| C(4)-C(5)-H(5A)     | 119.8      |
| C(6)-C(5)-H(5A)     | 119.8      |
| C(5)-C(6)-C(7)      | 121.73(16) |
| C(5)-C(6)-H(6A)     | 119.1      |
| C(7)-C(6)-H(6A)     | 119.1      |
| C(6)-C(7)-C(2)      | 117.46(15) |
| C(6)-C(7)-C(8)      | 122.10(15) |
| C(2)-C(7)-C(8)      | 120.41(15) |
| C(9)-C(8)-C(7)      | 119.80(15) |
| C(9)-C(8)-C(19)     | 121.35(16) |
| C(7)-C(8)-C(19)     | 118.83(15) |
| C(8)-C(9)-C(10)     | 120.53(15) |
| C(8)-C(9)-C(27)     | 124.77(16) |
| C(10)-C(9)-C(27)    | 114.70(14) |
| C(9)-C(10)-C(1)     | 113.80(13) |
| C(9)-C(10)-H(10A)   | 108.8      |
| C(1)-C(10)-H(10A)   | 108.8      |
| C(9)-C(10)-H(10B)   | 108.8      |
| C(1)-C(10)-H(10B)   | 108.8      |
| H(10A)-C(10)-H(10B) | 107.7      |
| O(1)-C(11)-N(1)     | 125.02(16) |
| O(1)-C(11)-C(1)     | 126.01(16) |
| N(1)-C(11)-C(1)     | 108.95(14) |
| C(13)-C(12)-C(17)   | 122.28(16) |
| C(13)-C(12)-N(1)    | 127.85(16) |
| C(17)-C(12)-N(1)    | 109.87(15) |

|                     |            |
|---------------------|------------|
| C(12)-C(13)-C(14)   | 116.56(16) |
| C(12)-C(13)-H(13A)  | 121.7      |
| C(14)-C(13)-H(13A)  | 121.7      |
| C(15)-C(14)-C(13)   | 122.65(16) |
| C(15)-C(14)-Cl(1)   | 119.29(14) |
| C(13)-C(14)-Cl(1)   | 118.06(14) |
| C(14)-C(15)-C(16)   | 119.76(16) |
| C(14)-C(15)-H(15A)  | 120.1      |
| C(16)-C(15)-H(15A)  | 120.1      |
| C(17)-C(16)-C(15)   | 118.98(16) |
| C(17)-C(16)-H(16A)  | 120.5      |
| C(15)-C(16)-H(16A)  | 120.5      |
| C(16)-C(17)-C(12)   | 119.73(16) |
| C(16)-C(17)-C(1)    | 131.49(15) |
| C(12)-C(17)-C(1)    | 108.76(14) |
| N(1)-C(18)-H(18A)   | 109.5      |
| N(1)-C(18)-H(18B)   | 109.5      |
| H(18A)-C(18)-H(18B) | 109.5      |
| N(1)-C(18)-H(18C)   | 109.5      |
| H(18A)-C(18)-H(18C) | 109.5      |
| H(18B)-C(18)-H(18C) | 109.5      |
| C(8)-C(19)-C(20)    | 114.66(14) |
| C(8)-C(19)-H(19A)   | 112.0(12)  |
| C(20)-C(19)-H(19A)  | 107.0(12)  |
| C(8)-C(19)-H(19B)   | 112.8(11)  |
| C(20)-C(19)-H(19B)  | 104.9(11)  |
| H(19A)-C(19)-H(19B) | 104.6(17)  |
| O(2)-C(20)-C(21)    | 120.70(15) |
| O(2)-C(20)-C(19)    | 121.89(16) |
| C(21)-C(20)-C(19)   | 117.41(14) |
| C(26)-C(21)-C(22)   | 119.10(16) |
| C(26)-C(21)-C(20)   | 122.33(15) |
| C(22)-C(21)-C(20)   | 118.55(15) |
| C(23)-C(22)-C(21)   | 120.36(16) |
| C(23)-C(22)-H(22A)  | 119.8      |
| C(21)-C(22)-H(22A)  | 119.8      |
| C(24)-C(23)-C(22)   | 119.95(17) |
| C(24)-C(23)-H(23A)  | 120.0      |

|                     |            |
|---------------------|------------|
| C(22)-C(23)-H(23A)  | 120.0      |
| C(25)-C(24)-C(23)   | 120.21(17) |
| C(25)-C(24)-H(24A)  | 119.9      |
| C(23)-C(24)-H(24A)  | 119.9      |
| C(24)-C(25)-C(26)   | 119.82(17) |
| C(24)-C(25)-H(25A)  | 120.1      |
| C(26)-C(25)-H(25A)  | 120.1      |
| C(21)-C(26)-C(25)   | 120.54(16) |
| C(21)-C(26)-H(26A)  | 119.7      |
| C(25)-C(26)-H(26A)  | 119.7      |
| C(9)-C(27)-C(28)    | 111.92(14) |
| C(9)-C(27)-H(27A)   | 109.2      |
| C(28)-C(27)-H(27A)  | 109.2      |
| C(9)-C(27)-H(27B)   | 109.2      |
| C(28)-C(27)-H(27B)  | 109.2      |
| H(27A)-C(27)-H(27B) | 107.9      |
| C(29)-C(28)-C(27)   | 113.39(15) |
| C(29)-C(28)-H(28A)  | 108.9      |
| C(27)-C(28)-H(28A)  | 108.9      |
| C(29)-C(28)-H(28B)  | 108.9      |
| C(27)-C(28)-H(28B)  | 108.9      |
| H(28A)-C(28)-H(28B) | 107.7      |
| C(30)-C(29)-C(28)   | 112.66(16) |
| C(30)-C(29)-H(29A)  | 109.1      |
| C(28)-C(29)-H(29A)  | 109.1      |
| C(30)-C(29)-H(29B)  | 109.1      |
| C(28)-C(29)-H(29B)  | 109.1      |
| H(29A)-C(29)-H(29B) | 107.8      |
| C(29)-C(30)-H(30A)  | 109.5      |
| C(29)-C(30)-H(30B)  | 109.5      |
| H(30A)-C(30)-H(30B) | 109.5      |
| C(29)-C(30)-H(30C)  | 109.5      |
| H(30A)-C(30)-H(30C) | 109.5      |
| H(30B)-C(30)-H(30C) | 109.5      |

---

Symmetry transformations used to generate equivalent atoms:

**Table S6.** Anisotropic displacement parameters ( $\text{\AA}^2 \times 10^3$ ) for d18163\_a. The anisotropic displacement factor exponent takes the form:  $-2\pi^2 [h^2 a^{*2} U^{11} + \dots + 2 h k a^* b^* U^{12}]$

|       | U <sup>11</sup> | U <sup>22</sup> | U <sup>33</sup> | U <sup>23</sup> | U <sup>13</sup> | U <sup>12</sup> |
|-------|-----------------|-----------------|-----------------|-----------------|-----------------|-----------------|
| Cl(1) | 30(1)           | 41(1)           | 41(1)           | -8(1)           | 17(1)           | 1(1)            |
| O(1)  | 30(1)           | 27(1)           | 33(1)           | 7(1)            | 11(1)           | -4(1)           |
| O(2)  | 57(1)           | 29(1)           | 48(1)           | 9(1)            | 34(1)           | 17(1)           |
| N(1)  | 28(1)           | 16(1)           | 30(1)           | 4(1)            | 8(1)            | 1(1)            |
| C(1)  | 22(1)           | 18(1)           | 24(1)           | 2(1)            | 7(1)            | 0(1)            |
| C(2)  | 22(1)           | 22(1)           | 22(1)           | 2(1)            | 10(1)           | -1(1)           |
| C(3)  | 28(1)           | 21(1)           | 29(1)           | -1(1)           | 11(1)           | 0(1)            |
| C(4)  | 28(1)           | 30(1)           | 28(1)           | -4(1)           | 7(1)            | -5(1)           |
| C(5)  | 24(1)           | 37(1)           | 28(1)           | -1(1)           | 4(1)            | 3(1)            |
| C(6)  | 30(1)           | 24(1)           | 28(1)           | 2(1)            | 9(1)            | 7(1)            |
| C(7)  | 25(1)           | 21(1)           | 21(1)           | 2(1)            | 10(1)           | 1(1)            |
| C(8)  | 27(1)           | 16(1)           | 28(1)           | 0(1)            | 14(1)           | 1(1)            |
| C(9)  | 25(1)           | 22(1)           | 25(1)           | -2(1)           | 12(1)           | -1(1)           |
| C(10) | 27(1)           | 22(1)           | 24(1)           | 0(1)            | 7(1)            | -1(1)           |
| C(11) | 22(1)           | 21(1)           | 26(1)           | 2(1)            | 2(1)            | -3(1)           |
| C(12) | 21(1)           | 20(1)           | 25(1)           | 0(1)            | 3(1)            | -1(1)           |
| C(13) | 22(1)           | 22(1)           | 31(1)           | -4(1)           | 4(1)            | 4(1)            |
| C(14) | 19(1)           | 31(1)           | 26(1)           | -5(1)           | 5(1)            | -1(1)           |
| C(15) | 25(1)           | 26(1)           | 27(1)           | -1(1)           | 8(1)            | -6(1)           |
| C(16) | 25(1)           | 18(1)           | 27(1)           | -2(1)           | 6(1)            | -2(1)           |
| C(17) | 19(1)           | 20(1)           | 25(1)           | -1(1)           | 4(1)            | -1(1)           |
| C(18) | 32(1)           | 18(1)           | 38(1)           | 5(1)            | 3(1)            | 2(1)            |
| C(19) | 29(1)           | 19(1)           | 32(1)           | 0(1)            | 12(1)           | 2(1)            |
| C(20) | 23(1)           | 23(1)           | 27(1)           | 0(1)            | 7(1)            | 3(1)            |
| C(21) | 23(1)           | 21(1)           | 23(1)           | -1(1)           | 5(1)            | 0(1)            |
| C(22) | 30(1)           | 28(1)           | 26(1)           | 1(1)            | 12(1)           | 3(1)            |
| C(23) | 39(1)           | 30(1)           | 28(1)           | 3(1)            | 14(1)           | -3(1)           |
| C(24) | 40(1)           | 18(1)           | 30(1)           | 3(1)            | 8(1)            | 1(1)            |
| C(25) | 34(1)           | 24(1)           | 40(1)           | 1(1)            | 16(1)           | 6(1)            |
| C(26) | 29(1)           | 23(1)           | 36(1)           | 3(1)            | 15(1)           | 1(1)            |
| C(27) | 31(1)           | 23(1)           | 30(1)           | -6(1)           | 9(1)            | -1(1)           |
| C(28) | 29(1)           | 22(1)           | 34(1)           | -3(1)           | 9(1)            | -1(1)           |
| C(29) | 32(1)           | 34(1)           | 39(1)           | -8(1)           | 8(1)            | -7(1)           |
| C(30) | 67(2)           | 27(1)           | 57(1)           | -7(1)           | 15(1)           | -12(1)          |

**Table S7.** Hydrogen coordinates ( $\times 10^4$ ) and isotropic displacement parameters ( $\text{\AA}^2 \times 10^{-3}$ ) for d18163\_a.

|        | x       | y        | z        | U(eq) |
|--------|---------|----------|----------|-------|
| H(3A)  | 7258    | 8993     | 3618     | 31    |
| H(4A)  | 8137    | 8595     | 4574     | 35    |
| H(5A)  | 8452    | 6883     | 4676     | 36    |
| H(6A)  | 7883    | 5582     | 3879     | 32    |
| H(10A) | 5878    | 7108     | 1519     | 29    |
| H(10B) | 6479    | 7247     | 1353     | 29    |
| H(13A) | 5334    | 9836     | 3608     | 31    |
| H(15A) | 5345    | 6867     | 4491     | 31    |
| H(16A) | 5999    | 6402     | 3707     | 28    |
| H(18A) | 6205    | 10821    | 2060     | 46    |
| H(18B) | 5932    | 10935    | 2881     | 46    |
| H(18C) | 5558    | 10565    | 1913     | 46    |
| H(19A) | 7388(9) | 4433(16) | 3231(14) | 41(6) |
| H(19B) | 6874(8) | 4084(15) | 2492(13) | 32(5) |
| H(22A) | 6196    | 2941     | 4589     | 33    |
| H(23A) | 6317    | 1201     | 5002     | 38    |
| H(24A) | 6998    | 219      | 4600     | 36    |
| H(25A) | 7537    | 956      | 3742     | 38    |
| H(26A) | 7406    | 2690     | 3305     | 34    |
| H(27A) | 6212    | 4485     | 1466     | 34    |
| H(27B) | 5912    | 5411     | 825      | 34    |
| H(28A) | 5600    | 4870     | 2423     | 34    |
| H(28B) | 5265    | 5635     | 1648     | 34    |
| H(29A) | 4764    | 4122     | 1422     | 43    |
| H(29B) | 5068    | 4159     | 634      | 43    |
| H(30A) | 5134    | 2491     | 1331     | 76    |
| H(30B) | 5496    | 2997     | 2254     | 76    |
| H(30C) | 5736    | 2967     | 1392     | 76    |

**Table S8.** Torsion angles [°] for d18163\_a.

---

|                       |             |
|-----------------------|-------------|
| C(17)-C(1)-C(2)-C(3)  | -82.12(18)  |
| C(10)-C(1)-C(2)-C(3)  | 149.52(15)  |
| C(11)-C(1)-C(2)-C(3)  | 30.3(2)     |
| C(17)-C(1)-C(2)-C(7)  | 94.83(17)   |
| C(10)-C(1)-C(2)-C(7)  | -33.53(19)  |
| C(11)-C(1)-C(2)-C(7)  | -152.71(14) |
| C(7)-C(2)-C(3)-C(4)   | -0.1(2)     |
| C(1)-C(2)-C(3)-C(4)   | 176.85(15)  |
| C(2)-C(3)-C(4)-C(5)   | 1.2(3)      |
| C(3)-C(4)-C(5)-C(6)   | -1.3(3)     |
| C(4)-C(5)-C(6)-C(7)   | 0.2(3)      |
| C(5)-C(6)-C(7)-C(2)   | 1.0(2)      |
| C(5)-C(6)-C(7)-C(8)   | 179.19(16)  |
| C(3)-C(2)-C(7)-C(6)   | -1.0(2)     |
| C(1)-C(2)-C(7)-C(6)   | -177.98(14) |
| C(3)-C(2)-C(7)-C(8)   | -179.28(15) |
| C(1)-C(2)-C(7)-C(8)   | 3.8(2)      |
| C(6)-C(7)-C(8)-C(9)   | -162.54(16) |
| C(2)-C(7)-C(8)-C(9)   | 15.6(2)     |
| C(6)-C(7)-C(8)-C(19)  | 16.3(2)     |
| C(2)-C(7)-C(8)-C(19)  | -165.51(15) |
| C(7)-C(8)-C(9)-C(10)  | -1.3(2)     |
| C(19)-C(8)-C(9)-C(10) | 179.92(15)  |
| C(7)-C(8)-C(9)-C(27)  | 178.93(15)  |
| C(19)-C(8)-C(9)-C(27) | 0.1(3)      |
| C(8)-C(9)-C(10)-C(1)  | -30.3(2)    |
| C(27)-C(9)-C(10)-C(1) | 149.51(14)  |
| C(17)-C(1)-C(10)-C(9) | -80.88(18)  |
| C(2)-C(1)-C(10)-C(9)  | 45.78(19)   |
| C(11)-C(1)-C(10)-C(9) | 167.07(14)  |
| C(12)-N(1)-C(11)-O(1) | 176.42(15)  |
| C(18)-N(1)-C(11)-O(1) | 1.5(3)      |
| C(12)-N(1)-C(11)-C(1) | -2.11(18)   |
| C(18)-N(1)-C(11)-C(1) | -176.99(14) |
| C(17)-C(1)-C(11)-O(1) | -175.64(16) |
| C(2)-C(1)-C(11)-O(1)  | 65.7(2)     |

|                         |             |
|-------------------------|-------------|
| C(10)-C(1)-C(11)-O(1)   | -55.0(2)    |
| C(17)-C(1)-C(11)-N(1)   | 2.87(16)    |
| C(2)-C(1)-C(11)-N(1)    | -115.77(15) |
| C(10)-C(1)-C(11)-N(1)   | 123.50(15)  |
| C(11)-N(1)-C(12)-C(13)  | -179.70(16) |
| C(18)-N(1)-C(12)-C(13)  | -5.0(3)     |
| C(11)-N(1)-C(12)-C(17)  | 0.33(19)    |
| C(18)-N(1)-C(12)-C(17)  | 175.00(15)  |
| C(17)-C(12)-C(13)-C(14) | -1.7(2)     |
| N(1)-C(12)-C(13)-C(14)  | 178.29(15)  |
| C(12)-C(13)-C(14)-C(15) | 1.9(2)      |
| C(12)-C(13)-C(14)-Cl(1) | -177.49(12) |
| C(13)-C(14)-C(15)-C(16) | -0.8(3)     |
| Cl(1)-C(14)-C(15)-C(16) | 178.58(12)  |
| C(14)-C(15)-C(16)-C(17) | -0.5(2)     |
| C(15)-C(16)-C(17)-C(12) | 0.6(2)      |
| C(15)-C(16)-C(17)-C(1)  | 179.23(16)  |
| C(13)-C(12)-C(17)-C(16) | 0.5(2)      |
| N(1)-C(12)-C(17)-C(16)  | -179.50(14) |
| C(13)-C(12)-C(17)-C(1)  | -178.35(15) |
| N(1)-C(12)-C(17)-C(1)   | 1.62(18)    |
| C(2)-C(1)-C(17)-C(16)   | -63.0(2)    |
| C(10)-C(1)-C(17)-C(16)  | 63.0(2)     |
| C(11)-C(1)-C(17)-C(16)  | 178.64(17)  |
| C(2)-C(1)-C(17)-C(12)   | 115.71(15)  |
| C(10)-C(1)-C(17)-C(12)  | -118.28(15) |
| C(11)-C(1)-C(17)-C(12)  | -2.65(17)   |
| C(9)-C(8)-C(19)-C(20)   | -91.2(2)    |
| C(7)-C(8)-C(19)-C(20)   | 89.93(19)   |
| C(8)-C(19)-C(20)-O(2)   | -4.7(3)     |
| C(8)-C(19)-C(20)-C(21)  | 174.71(15)  |
| O(2)-C(20)-C(21)-C(26)  | -167.04(18) |
| C(19)-C(20)-C(21)-C(26) | 13.5(2)     |
| O(2)-C(20)-C(21)-C(22)  | 11.3(2)     |
| C(19)-C(20)-C(21)-C(22) | -168.10(15) |
| C(26)-C(21)-C(22)-C(23) | 0.8(3)      |
| C(20)-C(21)-C(22)-C(23) | -177.65(16) |
| C(21)-C(22)-C(23)-C(24) | 0.5(3)      |

|                         |             |
|-------------------------|-------------|
| C(22)-C(23)-C(24)-C(25) | -1.2(3)     |
| C(23)-C(24)-C(25)-C(26) | 0.6(3)      |
| C(22)-C(21)-C(26)-C(25) | -1.4(3)     |
| C(20)-C(21)-C(26)-C(25) | 177.01(16)  |
| C(24)-C(25)-C(26)-C(21) | 0.7(3)      |
| C(8)-C(9)-C(27)-C(28)   | 96.1(2)     |
| C(10)-C(9)-C(27)-C(28)  | -83.70(18)  |
| C(9)-C(27)-C(28)-C(29)  | -169.65(15) |
| C(27)-C(28)-C(29)-C(30) | 70.9(2)     |

---

Symmetry transformations used to generate equivalent atoms:



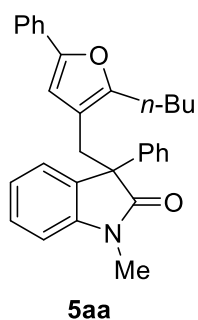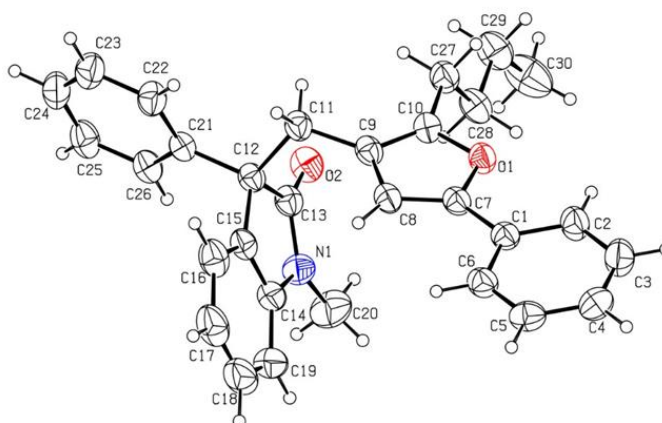

**Product 5aa** CCDC 2179949

**Table S9.** Crystal data and structure refinement for T.

|                                   |                                                  |                 |
|-----------------------------------|--------------------------------------------------|-----------------|
| Identification code               | t                                                |                 |
| Empirical formula                 | C <sub>30</sub> H <sub>29</sub> N O <sub>2</sub> |                 |
| Formula weight                    | 435.54                                           |                 |
| Temperature                       | 294(1) K                                         |                 |
| Wavelength                        | 1.34139 Å                                        |                 |
| Crystal system                    | Monoclinic                                       |                 |
| Space group                       | P 1 21/c 1                                       |                 |
| Unit cell dimensions              | a = 10.1015(8) Å                                 | α = 90°.        |
|                                   | b = 12.1620(11) Å                                | β = 90.612(3)°. |
|                                   | c = 19.767(2) Å                                  | γ = 90°.        |
| Volume                            | 2428.3(4) Å <sup>3</sup>                         |                 |
| Z                                 | 4                                                |                 |
| Density (calculated)              | 1.191 Mg/m <sup>3</sup>                          |                 |
| Absorption coefficient            | 0.367 mm <sup>-1</sup>                           |                 |
| F(000)                            | 928                                              |                 |
| Crystal size                      | 0.3 x 0.2 x 0.2 mm <sup>3</sup>                  |                 |
| Theta range for data collection   | 3.712 to 59.615°.                                |                 |
| Index ranges                      | -12 ≤ h ≤ 12, -14 ≤ k ≤ 15, -25 ≤ l ≤ 25         |                 |
| Reflections collected             | 26848                                            |                 |
| Independent reflections           | 5312 [R(int) = 0.0808]                           |                 |
| Completeness to theta = 53.594°   | 99.1 %                                           |                 |
| Absorption correction             | Semi-empirical from equivalents                  |                 |
| Max. and min. transmission        | 0.7516 and 0.5761                                |                 |
| Refinement method                 | Full-matrix least-squares on F <sup>2</sup>      |                 |
| Data / restraints / parameters    | 5312 / 0 / 301                                   |                 |
| Goodness-of-fit on F <sup>2</sup> | 1.092                                            |                 |

Final R indices [I>2sigma(I)]

R1 = 0.0541, wR2 = 0.1528

R indices (all data)

R1 = 0.0686, wR2 = 0.1641

Extinction coefficient

0.024(3)

Largest diff. peak and hole

0.300 and -0.167 e.Å<sup>-3</sup>

**Table S10.** Atomic coordinates ( $\times 10^4$ ) and equivalent isotropic displacement parameters ( $\text{\AA}^2 \times 10^3$ ) for T. U(eq) is defined as one third of the trace of the orthogonalized  $U^{\text{ij}}$  tensor.

|       | x        | y       | z       | U(eq)  |
|-------|----------|---------|---------|--------|
| C(1)  | 6924(1)  | 8489(1) | 5228(1) | 54(1)  |
| C(2)  | 8176(2)  | 8516(2) | 5529(1) | 70(1)  |
| C(3)  | 8361(2)  | 9033(2) | 6146(1) | 82(1)  |
| C(4)  | 7320(2)  | 9526(2) | 6467(1) | 74(1)  |
| C(5)  | 6083(2)  | 9510(1) | 6172(1) | 71(1)  |
| C(6)  | 5887(2)  | 8996(1) | 5559(1) | 63(1)  |
| C(7)  | 6692(1)  | 7950(1) | 4579(1) | 54(1)  |
| C(8)  | 5634(1)  | 7905(1) | 4151(1) | 56(1)  |
| C(9)  | 6034(1)  | 7328(1) | 3562(1) | 54(1)  |
| C(10) | 7312(1)  | 7034(1) | 3667(1) | 57(1)  |
| C(11) | 5235(1)  | 7172(1) | 2924(1) | 57(1)  |
| C(12) | 4087(1)  | 6330(1) | 2971(1) | 52(1)  |
| C(13) | 4674(1)  | 5241(1) | 3228(1) | 57(1)  |
| C(14) | 3144(2)  | 5787(1) | 4006(1) | 65(1)  |
| C(15) | 3108(1)  | 6603(1) | 3522(1) | 58(1)  |
| C(16) | 2252(2)  | 7472(2) | 3589(1) | 76(1)  |
| C(17) | 1431(2)  | 7513(2) | 4154(1) | 98(1)  |
| C(18) | 1482(2)  | 6688(3) | 4626(1) | 105(1) |
| C(19) | 2334(2)  | 5812(2) | 4566(1) | 93(1)  |
| C(20) | 4375(3)  | 3997(2) | 4205(1) | 105(1) |
| C(21) | 3384(1)  | 6167(1) | 2288(1) | 53(1)  |
| C(22) | 3250(2)  | 7025(1) | 1830(1) | 68(1)  |
| C(23) | 2623(2)  | 6863(2) | 1214(1) | 81(1)  |
| C(24) | 2106(2)  | 5857(2) | 1044(1) | 80(1)  |
| C(25) | 2203(2)  | 5004(2) | 1500(1) | 75(1)  |
| C(26) | 2842(1)  | 5157(1) | 2115(1) | 63(1)  |
| C(27) | 8323(2)  | 6459(2) | 3260(1) | 66(1)  |
| C(28) | 8753(2)  | 5348(2) | 3527(1) | 74(1)  |
| C(29) | 9837(2)  | 4843(2) | 3103(1) | 89(1)  |
| C(30) | 10342(3) | 3758(2) | 3358(2) | 123(1) |
| N(1)  | 4087(1)  | 4989(1) | 3827(1) | 68(1)  |
| O(1)  | 7736(1)  | 7406(1) | 4292(1) | 59(1)  |
| O(2)  | 5525(1)  | 4695(1) | 2952(1) | 71(1)  |

**Table S11.** Bond lengths [Å] and angles [°] for T.

---

|              |            |
|--------------|------------|
| C(1)-C(2)    | 1.392(2)   |
| C(1)-C(6)    | 1.387(2)   |
| C(1)-C(7)    | 1.457(2)   |
| C(2)-H(2)    | 0.9300     |
| C(2)-C(3)    | 1.384(2)   |
| C(3)-H(3)    | 0.9300     |
| C(3)-C(4)    | 1.372(3)   |
| C(4)-H(4)    | 0.9300     |
| C(4)-C(5)    | 1.373(2)   |
| C(5)-H(5)    | 0.9300     |
| C(5)-C(6)    | 1.376(2)   |
| C(6)-H(6)    | 0.9300     |
| C(7)-C(8)    | 1.3574(19) |
| C(7)-O(1)    | 1.3731(16) |
| C(8)-H(8)    | 0.9300     |
| C(8)-C(9)    | 1.422(2)   |
| C(9)-C(10)   | 1.353(2)   |
| C(9)-C(11)   | 1.5027(19) |
| C(10)-C(27)  | 1.482(2)   |
| C(10)-O(1)   | 1.3798(16) |
| C(11)-H(11A) | 0.9700     |
| C(11)-H(11B) | 0.9700     |
| C(11)-C(12)  | 1.5504(18) |
| C(12)-C(13)  | 1.5357(18) |
| C(12)-C(15)  | 1.516(2)   |
| C(12)-C(21)  | 1.5311(18) |
| C(13)-N(1)   | 1.3654(19) |
| C(13)-O(2)   | 1.2186(17) |
| C(14)-C(15)  | 1.378(2)   |
| C(14)-C(19)  | 1.383(2)   |
| C(14)-N(1)   | 1.408(2)   |
| C(15)-C(16)  | 1.373(2)   |
| C(16)-H(16)  | 0.9300     |
| C(16)-C(17)  | 1.399(3)   |
| C(17)-H(17)  | 0.9300     |
| C(17)-C(18)  | 1.371(4)   |

|                |            |
|----------------|------------|
| C(18)-H(18)    | 0.9300     |
| C(18)-C(19)    | 1.376(4)   |
| C(19)-H(19)    | 0.9300     |
| C(20)-H(20A)   | 0.9600     |
| C(20)-H(20B)   | 0.9600     |
| C(20)-H(20C)   | 0.9600     |
| C(20)-N(1)     | 1.447(2)   |
| C(21)-C(22)    | 1.388(2)   |
| C(21)-C(26)    | 1.3861(19) |
| C(22)-H(22)    | 0.9300     |
| C(22)-C(23)    | 1.380(2)   |
| C(23)-H(23)    | 0.9300     |
| C(23)-C(24)    | 1.371(3)   |
| C(24)-H(24)    | 0.9300     |
| C(24)-C(25)    | 1.376(3)   |
| C(25)-H(25)    | 0.9300     |
| C(25)-C(26)    | 1.383(2)   |
| C(26)-H(26)    | 0.9300     |
| C(27)-H(27A)   | 0.9700     |
| C(27)-H(27B)   | 0.9700     |
| C(27)-C(28)    | 1.513(2)   |
| C(28)-H(28A)   | 0.9700     |
| C(28)-H(28B)   | 0.9700     |
| C(28)-C(29)    | 1.516(2)   |
| C(29)-H(29A)   | 0.9700     |
| C(29)-H(29B)   | 0.9700     |
| C(29)-C(30)    | 1.500(3)   |
| C(30)-H(30A)   | 0.9600     |
| C(30)-H(30B)   | 0.9600     |
| C(30)-H(30C)   | 0.9600     |
|                |            |
| C(2)-C(1)-C(7) | 121.59(13) |
| C(6)-C(1)-C(2) | 118.38(14) |
| C(6)-C(1)-C(7) | 120.03(13) |
| C(1)-C(2)-H(2) | 120.0      |
| C(3)-C(2)-C(1) | 120.09(15) |
| C(3)-C(2)-H(2) | 120.0      |
| C(2)-C(3)-H(3) | 119.7      |

|                     |            |
|---------------------|------------|
| C(4)-C(3)-C(2)      | 120.62(16) |
| C(4)-C(3)-H(3)      | 119.7      |
| C(3)-C(4)-H(4)      | 120.1      |
| C(3)-C(4)-C(5)      | 119.72(15) |
| C(5)-C(4)-H(4)      | 120.1      |
| C(4)-C(5)-H(5)      | 119.9      |
| C(4)-C(5)-C(6)      | 120.17(15) |
| C(6)-C(5)-H(5)      | 119.9      |
| C(1)-C(6)-H(6)      | 119.5      |
| C(5)-C(6)-C(1)      | 121.02(15) |
| C(5)-C(6)-H(6)      | 119.5      |
| C(8)-C(7)-C(1)      | 133.25(13) |
| C(8)-C(7)-O(1)      | 109.02(12) |
| O(1)-C(7)-C(1)      | 117.63(11) |
| C(7)-C(8)-H(8)      | 126.2      |
| C(7)-C(8)-C(9)      | 107.56(13) |
| C(9)-C(8)-H(8)      | 126.2      |
| C(8)-C(9)-C(11)     | 126.56(13) |
| C(10)-C(9)-C(8)     | 106.51(12) |
| C(10)-C(9)-C(11)    | 126.69(13) |
| C(9)-C(10)-C(27)    | 134.71(13) |
| C(9)-C(10)-O(1)     | 109.69(12) |
| O(1)-C(10)-C(27)    | 115.56(12) |
| C(9)-C(11)-H(11A)   | 108.4      |
| C(9)-C(11)-H(11B)   | 108.4      |
| C(9)-C(11)-C(12)    | 115.33(11) |
| H(11A)-C(11)-H(11B) | 107.5      |
| C(12)-C(11)-H(11A)  | 108.4      |
| C(12)-C(11)-H(11B)  | 108.4      |
| C(13)-C(12)-C(11)   | 107.66(10) |
| C(15)-C(12)-C(11)   | 113.18(11) |
| C(15)-C(12)-C(13)   | 101.75(11) |
| C(15)-C(12)-C(21)   | 111.18(11) |
| C(21)-C(12)-C(11)   | 111.87(11) |
| C(21)-C(12)-C(13)   | 110.67(11) |
| N(1)-C(13)-C(12)    | 108.10(12) |
| O(2)-C(13)-C(12)    | 126.44(13) |
| O(2)-C(13)-N(1)     | 125.46(13) |

|                     |            |
|---------------------|------------|
| C(15)-C(14)-C(19)   | 121.89(18) |
| C(15)-C(14)-N(1)    | 109.55(13) |
| C(19)-C(14)-N(1)    | 128.56(17) |
| C(14)-C(15)-C(12)   | 109.20(13) |
| C(16)-C(15)-C(12)   | 130.81(15) |
| C(16)-C(15)-C(14)   | 119.97(15) |
| C(15)-C(16)-H(16)   | 120.5      |
| C(15)-C(16)-C(17)   | 118.9(2)   |
| C(17)-C(16)-H(16)   | 120.5      |
| C(16)-C(17)-H(17)   | 120.0      |
| C(18)-C(17)-C(16)   | 119.9(2)   |
| C(18)-C(17)-H(17)   | 120.0      |
| C(17)-C(18)-H(18)   | 119.1      |
| C(17)-C(18)-C(19)   | 121.80(19) |
| C(19)-C(18)-H(18)   | 119.1      |
| C(14)-C(19)-H(19)   | 121.3      |
| C(18)-C(19)-C(14)   | 117.5(2)   |
| C(18)-C(19)-H(19)   | 121.3      |
| H(20A)-C(20)-H(20B) | 109.5      |
| H(20A)-C(20)-H(20C) | 109.5      |
| H(20B)-C(20)-H(20C) | 109.5      |
| N(1)-C(20)-H(20A)   | 109.5      |
| N(1)-C(20)-H(20B)   | 109.5      |
| N(1)-C(20)-H(20C)   | 109.5      |
| C(22)-C(21)-C(12)   | 121.28(12) |
| C(26)-C(21)-C(12)   | 120.71(12) |
| C(26)-C(21)-C(22)   | 118.00(13) |
| C(21)-C(22)-H(22)   | 119.7      |
| C(23)-C(22)-C(21)   | 120.61(16) |
| C(23)-C(22)-H(22)   | 119.7      |
| C(22)-C(23)-H(23)   | 119.5      |
| C(24)-C(23)-C(22)   | 120.90(17) |
| C(24)-C(23)-H(23)   | 119.5      |
| C(23)-C(24)-H(24)   | 120.4      |
| C(23)-C(24)-C(25)   | 119.20(15) |
| C(25)-C(24)-H(24)   | 120.4      |
| C(24)-C(25)-H(25)   | 119.9      |
| C(24)-C(25)-C(26)   | 120.24(16) |

|                     |            |
|---------------------|------------|
| C(26)-C(25)-H(25)   | 119.9      |
| C(21)-C(26)-H(26)   | 119.5      |
| C(25)-C(26)-C(21)   | 121.02(15) |
| C(25)-C(26)-H(26)   | 119.5      |
| C(10)-C(27)-H(27A)  | 108.4      |
| C(10)-C(27)-H(27B)  | 108.4      |
| C(10)-C(27)-C(28)   | 115.40(14) |
| H(27A)-C(27)-H(27B) | 107.5      |
| C(28)-C(27)-H(27A)  | 108.4      |
| C(28)-C(27)-H(27B)  | 108.4      |
| C(27)-C(28)-H(28A)  | 109.2      |
| C(27)-C(28)-H(28B)  | 109.2      |
| C(27)-C(28)-C(29)   | 112.05(16) |
| H(28A)-C(28)-H(28B) | 107.9      |
| C(29)-C(28)-H(28A)  | 109.2      |
| C(29)-C(28)-H(28B)  | 109.2      |
| C(28)-C(29)-H(29A)  | 108.6      |
| C(28)-C(29)-H(29B)  | 108.6      |
| H(29A)-C(29)-H(29B) | 107.6      |
| C(30)-C(29)-C(28)   | 114.60(19) |
| C(30)-C(29)-H(29A)  | 108.6      |
| C(30)-C(29)-H(29B)  | 108.6      |
| C(29)-C(30)-H(30A)  | 109.5      |
| C(29)-C(30)-H(30B)  | 109.5      |
| C(29)-C(30)-H(30C)  | 109.5      |
| H(30A)-C(30)-H(30B) | 109.5      |
| H(30A)-C(30)-H(30C) | 109.5      |
| H(30B)-C(30)-H(30C) | 109.5      |
| C(13)-N(1)-C(14)    | 111.38(12) |
| C(13)-N(1)-C(20)    | 123.27(16) |
| C(14)-N(1)-C(20)    | 125.29(16) |
| C(7)-O(1)-C(10)     | 107.21(10) |

---

Symmetry transformations used to generate equivalent atoms:



**Table S12.** Anisotropic displacement parameters ( $\text{\AA}^2 \times 10^3$ ) for T. The anisotropic displacement factor exponent takes the form:  $-2\pi^2 [h^2 a^{*2} U^{11} + \dots + 2 h k a^* b^* U^{12}]$

|       | U <sup>11</sup> | U <sup>22</sup> | U <sup>33</sup> | U <sup>23</sup> | U <sup>13</sup> | U <sup>12</sup> |
|-------|-----------------|-----------------|-----------------|-----------------|-----------------|-----------------|
| C(1)  | 51(1)           | 51(1)           | 60(1)           | 6(1)            | 2(1)            | 0(1)            |
| C(2)  | 53(1)           | 86(1)           | 71(1)           | -10(1)          | -4(1)           | 9(1)            |
| C(3)  | 70(1)           | 100(1)          | 76(1)           | -14(1)          | -13(1)          | 5(1)            |
| C(4)  | 90(1)           | 68(1)           | 63(1)           | -2(1)           | 1(1)            | 4(1)            |
| C(5)  | 78(1)           | 64(1)           | 71(1)           | 4(1)            | 16(1)           | 11(1)           |
| C(6)  | 55(1)           | 66(1)           | 70(1)           | 6(1)            | 4(1)            | 5(1)            |
| C(7)  | 46(1)           | 53(1)           | 63(1)           | 4(1)            | 2(1)            | 1(1)            |
| C(8)  | 46(1)           | 54(1)           | 68(1)           | 5(1)            | -3(1)           | -1(1)           |
| C(9)  | 48(1)           | 46(1)           | 69(1)           | 4(1)            | -2(1)           | -4(1)           |
| C(10) | 53(1)           | 58(1)           | 60(1)           | -2(1)           | -3(1)           | -1(1)           |
| C(11) | 52(1)           | 53(1)           | 66(1)           | 7(1)            | -6(1)           | -6(1)           |
| C(12) | 47(1)           | 47(1)           | 61(1)           | 2(1)            | -1(1)           | -2(1)           |
| C(13) | 53(1)           | 49(1)           | 68(1)           | 3(1)            | -4(1)           | -3(1)           |
| C(14) | 56(1)           | 78(1)           | 62(1)           | -2(1)           | 0(1)            | -14(1)          |
| C(15) | 46(1)           | 61(1)           | 65(1)           | -9(1)           | -3(1)           | -5(1)           |
| C(16) | 60(1)           | 77(1)           | 89(1)           | -22(1)          | -7(1)           | 7(1)            |
| C(17) | 60(1)           | 132(2)          | 101(1)          | -50(1)          | 1(1)            | 11(1)           |
| C(18) | 66(1)           | 166(3)          | 82(1)           | -39(2)          | 12(1)           | -10(1)          |
| C(19) | 79(1)           | 134(2)          | 66(1)           | -1(1)           | 8(1)            | -25(1)          |
| C(20) | 130(2)          | 83(1)           | 103(1)          | 41(1)           | -5(1)           | 0(1)            |
| C(21) | 43(1)           | 54(1)           | 61(1)           | -2(1)           | 0(1)            | 1(1)            |
| C(22) | 66(1)           | 64(1)           | 75(1)           | 5(1)            | -14(1)          | 0(1)            |
| C(23) | 73(1)           | 90(1)           | 78(1)           | 11(1)           | -18(1)          | 4(1)            |
| C(24) | 60(1)           | 105(1)          | 72(1)           | -16(1)          | -14(1)          | 9(1)            |
| C(25) | 58(1)           | 78(1)           | 90(1)           | -28(1)          | -7(1)           | -1(1)           |
| C(26) | 54(1)           | 59(1)           | 76(1)           | -7(1)           | -2(1)           | -3(1)           |
| C(27) | 54(1)           | 78(1)           | 66(1)           | -8(1)           | 0(1)            | 2(1)            |
| C(28) | 54(1)           | 73(1)           | 96(1)           | -6(1)           | 5(1)            | 4(1)            |
| C(29) | 68(1)           | 88(1)           | 111(1)          | -13(1)          | 9(1)            | 15(1)           |
| C(30) | 90(2)           | 88(2)           | 191(3)          | 9(2)            | 36(2)           | 20(1)           |
| N(1)  | 75(1)           | 60(1)           | 69(1)           | 15(1)           | -1(1)           | -5(1)           |
| O(1)  | 47(1)           | 66(1)           | 62(1)           | -3(1)           | -3(1)           | 5(1)            |
| O(2)  | 67(1)           | 57(1)           | 88(1)           | 1(1)            | -1(1)           | 12(1)           |

**Table S13.** Hydrogen coordinates ( $\times 10^4$ ) and isotropic displacement parameters ( $\text{\AA}^2 \times 10^{-3}$ ) for T.

|        | x     | y    | z    | U(eq) |
|--------|-------|------|------|-------|
| H(2)   | 8889  | 8186 | 5315 | 84    |
| H(3)   | 9199  | 9046 | 6346 | 98    |
| H(4)   | 7452  | 9870 | 6883 | 88    |
| H(5)   | 5377  | 9847 | 6387 | 85    |
| H(6)   | 5045  | 8989 | 5364 | 76    |
| H(8)   | 4799  | 8199 | 4229 | 68    |
| H(11A) | 5827  | 6937 | 2568 | 68    |
| H(11B) | 4868  | 7877 | 2790 | 68    |
| H(16)  | 2219  | 8025 | 3264 | 91    |
| H(17)  | 851   | 8100 | 4209 | 117   |
| H(18)  | 925   | 6722 | 4997 | 126   |
| H(19)  | 2365  | 5257 | 4890 | 111   |
| H(20A) | 3662  | 3483 | 4146 | 158   |
| H(20B) | 4473  | 4173 | 4677 | 158   |
| H(20C) | 5181  | 3676 | 4044 | 158   |
| H(22)  | 3585  | 7716 | 1938 | 82    |
| H(23)  | 2550  | 7444 | 910  | 97    |
| H(24)  | 1694  | 5751 | 626  | 95    |
| H(25)  | 1837  | 4323 | 1394 | 90    |
| H(26)  | 2910  | 4573 | 2417 | 76    |
| H(27A) | 9098  | 6927 | 3230 | 80    |
| H(27B) | 7975  | 6362 | 2804 | 80    |
| H(28A) | 7996  | 4858 | 3532 | 89    |
| H(28B) | 9071  | 5430 | 3989 | 89    |
| H(29A) | 9502  | 4744 | 2646 | 107   |
| H(29B) | 10572 | 5354 | 3084 | 107   |
| H(30A) | 10711 | 3850 | 3804 | 184   |
| H(30B) | 11012 | 3489 | 3060 | 184   |
| H(30C) | 9625  | 3240 | 3374 | 184   |

**Table S14.** Torsion angles [°] for T.

---

|                         |             |
|-------------------------|-------------|
| C(1)-C(2)-C(3)-C(4)     | -0.2(3)     |
| C(1)-C(7)-C(8)-C(9)     | 174.92(14)  |
| C(1)-C(7)-O(1)-C(10)    | -175.86(12) |
| C(2)-C(1)-C(6)-C(5)     | -0.3(2)     |
| C(2)-C(1)-C(7)-C(8)     | -171.88(16) |
| C(2)-C(1)-C(7)-O(1)     | 4.0(2)      |
| C(2)-C(3)-C(4)-C(5)     | -0.2(3)     |
| C(3)-C(4)-C(5)-C(6)     | 0.4(3)      |
| C(4)-C(5)-C(6)-C(1)     | -0.1(2)     |
| C(6)-C(1)-C(2)-C(3)     | 0.5(3)      |
| C(6)-C(1)-C(7)-C(8)     | 7.8(2)      |
| C(6)-C(1)-C(7)-O(1)     | -176.31(12) |
| C(7)-C(1)-C(2)-C(3)     | -179.87(16) |
| C(7)-C(1)-C(6)-C(5)     | -179.98(14) |
| C(7)-C(8)-C(9)-C(10)    | 1.02(16)    |
| C(7)-C(8)-C(9)-C(11)    | -173.65(12) |
| C(8)-C(7)-O(1)-C(10)    | 1.00(15)    |
| C(8)-C(9)-C(10)-C(27)   | -177.78(17) |
| C(8)-C(9)-C(10)-O(1)    | -0.42(16)   |
| C(8)-C(9)-C(11)-C(12)   | -74.19(17)  |
| C(9)-C(10)-C(27)-C(28)  | -113.66(19) |
| C(9)-C(10)-O(1)-C(7)    | -0.34(15)   |
| C(9)-C(11)-C(12)-C(13)  | -54.52(15)  |
| C(9)-C(11)-C(12)-C(15)  | 57.13(16)   |
| C(9)-C(11)-C(12)-C(21)  | -176.32(11) |
| C(10)-C(9)-C(11)-C(12)  | 112.18(16)  |
| C(10)-C(27)-C(28)-C(29) | -177.07(14) |
| C(11)-C(9)-C(10)-C(27)  | -3.1(3)     |
| C(11)-C(9)-C(10)-O(1)   | 174.25(12)  |
| C(11)-C(12)-C(13)-N(1)  | 118.96(13)  |
| C(11)-C(12)-C(13)-O(2)  | -60.37(17)  |
| C(11)-C(12)-C(15)-C(14) | -115.47(13) |
| C(11)-C(12)-C(15)-C(16) | 65.55(18)   |
| C(11)-C(12)-C(21)-C(22) | -33.49(18)  |
| C(11)-C(12)-C(21)-C(26) | 147.56(13)  |
| C(12)-C(13)-N(1)-C(14)  | 0.69(16)    |

|                         |             |
|-------------------------|-------------|
| C(12)-C(13)-N(1)-C(20)  | 178.20(16)  |
| C(12)-C(15)-C(16)-C(17) | 179.09(15)  |
| C(12)-C(21)-C(22)-C(23) | 179.47(15)  |
| C(12)-C(21)-C(26)-C(25) | 179.85(13)  |
| C(13)-C(12)-C(15)-C(14) | -0.25(14)   |
| C(13)-C(12)-C(15)-C(16) | -179.23(15) |
| C(13)-C(12)-C(21)-C(22) | -153.55(13) |
| C(13)-C(12)-C(21)-C(26) | 27.50(17)   |
| C(14)-C(15)-C(16)-C(17) | 0.2(2)      |
| C(15)-C(12)-C(13)-N(1)  | -0.26(14)   |
| C(15)-C(12)-C(13)-O(2)  | -179.59(13) |
| C(15)-C(12)-C(21)-C(22) | 94.14(16)   |
| C(15)-C(12)-C(21)-C(26) | -84.82(16)  |
| C(15)-C(14)-C(19)-C(18) | -0.1(3)     |
| C(15)-C(14)-N(1)-C(13)  | -0.87(17)   |
| C(15)-C(14)-N(1)-C(20)  | -178.32(17) |
| C(15)-C(16)-C(17)-C(18) | -0.6(3)     |
| C(16)-C(17)-C(18)-C(19) | 0.6(3)      |
| C(17)-C(18)-C(19)-C(14) | -0.3(3)     |
| C(19)-C(14)-C(15)-C(12) | -178.98(14) |
| C(19)-C(14)-C(15)-C(16) | 0.1(2)      |
| C(19)-C(14)-N(1)-C(13)  | 178.74(16)  |
| C(19)-C(14)-N(1)-C(20)  | 1.3(3)      |
| C(21)-C(12)-C(13)-N(1)  | -118.49(13) |
| C(21)-C(12)-C(13)-O(2)  | 62.18(18)   |
| C(21)-C(12)-C(15)-C(14) | 117.61(12)  |
| C(21)-C(12)-C(15)-C(16) | -61.37(19)  |
| C(21)-C(22)-C(23)-C(24) | 0.7(3)      |
| C(22)-C(21)-C(26)-C(25) | 0.9(2)      |
| C(22)-C(23)-C(24)-C(25) | 0.8(3)      |
| C(23)-C(24)-C(25)-C(26) | -1.5(3)     |
| C(24)-C(25)-C(26)-C(21) | 0.7(2)      |
| C(26)-C(21)-C(22)-C(23) | -1.6(2)     |
| C(27)-C(10)-O(1)-C(7)   | 177.59(12)  |
| C(27)-C(28)-C(29)-C(30) | 177.83(19)  |
| N(1)-C(14)-C(15)-C(12)  | 0.66(16)    |
| N(1)-C(14)-C(15)-C(16)  | 179.77(13)  |
| N(1)-C(14)-C(19)-C(18)  | -179.68(17) |

|                        |             |
|------------------------|-------------|
| O(1)-C(7)-C(8)-C(9)    | -1.25(15)   |
| O(1)-C(10)-C(27)-C(28) | 69.09(18)   |
| O(2)-C(13)-N(1)-C(14)  | -179.98(13) |
| O(2)-C(13)-N(1)-C(20)  | -2.5(3)     |

---

Symmetry transformations used to generate equivalent atoms:

**Table S15.** Hydrogen bonds for T [ $\text{\AA}$  and  $^\circ$ ].

---

| D-H...A | d(D-H) | d(H...A) | d(D...A) | $\angle(\text{DHA})$ |
|---------|--------|----------|----------|----------------------|
|---------|--------|----------|----------|----------------------|

---

## 11) Computational Studies

### Computational Details

Density functional theory (DFT) calculations were performed using Gaussian 09 program.<sup>4</sup> The B3LYP<sup>5</sup> functional with Grimme D3 correction<sup>6</sup> was employed for all geometry optimizations a mixed basis set of SDD<sup>7</sup> (Pd, I, K, and Cs) and 6-31G(d)<sup>8</sup> (C, H, N, O, P, and Cl). Frequency analyses were carried out at the same level of theory to determine the intermediates to be minima (no imaginary frequency) or transition states (only one imaginary frequency) and to acquire the thermal corrections to free energies. Single-point solvation energies were calculated at M06-D3<sup>9</sup>/6-311+G(d,p)<sup>10</sup>-SDD level of theory with SMD<sup>11</sup> continuum model in MeCN solvent. The sum of the thermal correction to free energy and the single-point energy is taken as the Gibbs free energy for intermediates or transition states to provide more accurate energetics. The calculated 3D optimized structures are visualized utilizing CYLview program.<sup>12</sup>

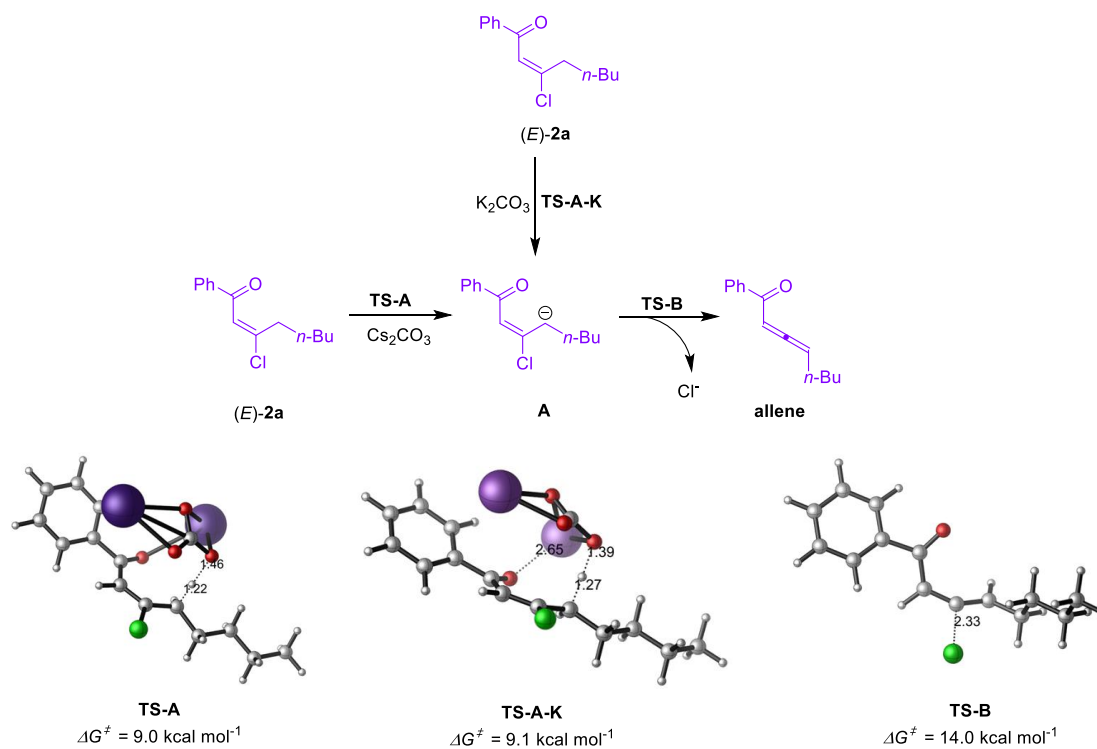

**Figure S1.** The generation of allene form substrate (E)-2a.

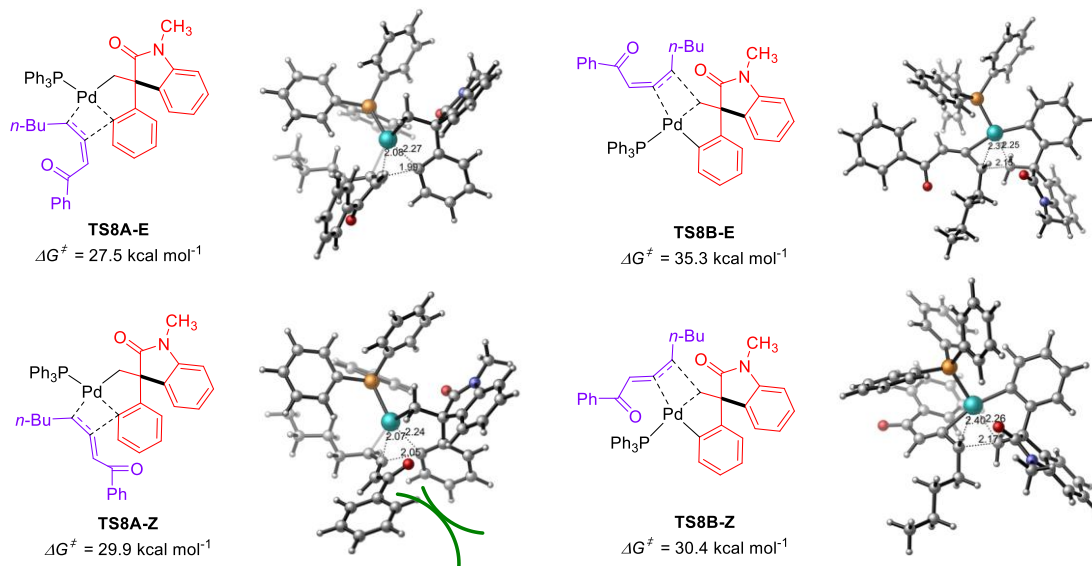

**Figure S2.** Activation energies for the migratory insertion step with allenyl ketone **6** and transition state structures.

**Comment:** The electron-rich double bond of the *in-situ* generated allene is kinetically more favorable to undergo migratory insertion into the Pd(II)-Csp<sup>2</sup> bond of **INT7A** through transition state **TS8A-E** with a surmountable activation energy of 27.5 kcal mol<sup>-1</sup>, which is significantly lower than the migratory insertion into Pd-Csp<sup>3</sup> bond via transition states **TS8B-E** and **TS8B-Z** (27.5 vs 35.3 and 30.4 kcal mol<sup>-1</sup>). The energy barrier of transition state **TS8A-Z** is 29.9 kcal mol<sup>-1</sup>, which is 2.4 kcal mol<sup>-1</sup> higher than that of **TS8A-E**. This difference in energy can be attributed to the noticeable increase in steric hindrance between phenylacetyl group of **6** and phenyl attached to palladium.

**Table S16.** The calculated energies of stationary points (in Hartree/Particle).

| Structure        | ZPE      | H <sub>corr</sub> | G <sub>corr</sub> | E <sub>ele</sub> | H <sub>sol</sub> | G <sub>sol</sub> |
|------------------|----------|-------------------|-------------------|------------------|------------------|------------------|
| <b>INT1A</b>     | 0.551608 | 0.588175          | 0.473910          | -2199.847233     | -2199.259058     | -2199.373323     |
| <b>1a</b>        | 0.259615 | 0.277904          | 0.212223          | -759.151676      | -758.873772      | -758.939453      |
| <b>TS2A</b>      | 0.813555 | 0.867576          | 0.721879          | -2959.012470     | -2958.144894     | -2958.290591     |
| <b>INT2A</b>     | 0.815166 | 0.869647          | 0.721991          | -2959.068711     | -2958.199064     | -2958.346720     |
| <b>INT3A</b>     | 0.815502 | 0.867426          | 0.726782          | -2947.481327     | -2946.613901     | -2946.754545     |
| I <sup>-</sup>   | 0.000000 | 0.002360          | -0.016848         | -11.572844       | -11.570484       | -11.589692       |
| <b>INT3B</b>     | 0.538085 | 0.575227          | 0.466719          | -1923.100643     | -1922.525416     | -1922.633924     |
| PPh <sub>3</sub> | 0.274431 | 0.291257          | 0.228011          | -1035.926986     | -1035.635729     | -1035.698975     |
| <b>TS4A</b>      | 0.814348 | 0.865574          | 0.727593          | -2947.470905     | -2946.605331     | -2946.743312     |
| <b>INT4A</b>     | 0.817253 | 0.868571          | 0.729212          | -2947.516132     | -2946.647561     | -2946.786920     |



|                                                  |          |          |           |              |              |              |
|--------------------------------------------------|----------|----------|-----------|--------------|--------------|--------------|
| <b>TS4B</b>                                      | 0.816727 | 0.867117 | 0.733763  | -2947.442359 | -2946.575242 | -2946.708596 |
| <b>INT4B</b>                                     | 0.817961 | 0.869118 | 0.731714  | -2947.513206 | -2946.644088 | -2946.781492 |
| <b>TS4C</b>                                      | 0.536765 | 0.573261 | 0.465612  | -1923.082831 | -1922.509570 | -1922.617219 |
| <b>INT4C</b>                                     | 0.539489 | 0.576342 | 0.466878  | -1923.122875 | -1922.546533 | -1922.655997 |
| <b>TS4D</b>                                      | 0.537786 | 0.574004 | 0.467284  | -1923.065062 | -1922.491058 | -1922.597778 |
| <b>INT4D</b>                                     | 0.540300 | 0.576687 | 0.469331  | -1923.137996 | -1922.561309 | -1922.668665 |
| <b>(E)-2a</b>                                    | 0.278348 | 0.295639 | 0.230935  | -1078.847697 | -1078.552058 | -1078.616762 |
| <b>C<sub>s2</sub>CO<sub>3</sub></b>              | 0.015395 | 0.023708 | -0.022110 | -304.180657  | -304.156949  | -304.202767  |
| <b>TS-A</b>                                      | 0.290415 | 0.316099 | 0.228609  | -1383.033765 | -1382.717666 | -1382.805156 |
| <b>K<sub>2</sub>CO<sub>3</sub></b>               | 0.016389 | 0.024110 | -0.016839 | -320.510336  | -320.486226  | -320.527175  |
| <b>TS-A-K</b>                                    | 0.290461 | 0.315548 | 0.232345  | -1399.361731 | -1399.046183 | -1399.129386 |
| <b>A</b>                                         | 0.263156 | 0.280365 | 0.216849  | -1078.358106 | -1078.077741 | -1078.141257 |
| <b>TS-B</b>                                      | 0.290415 | 0.316099 | 0.228609  | -1078.347600 | -1078.031501 | -1078.118991 |
| <b>6</b>                                         | 0.263065 | 0.278966 | 0.218261  | -618.007985  | -617.729019  | -617.789724  |
| <b>INT5A</b>                                     | 0.556898 | 0.599786 | 0.475635  | -2215.778297 | -2215.178511 | -2215.302662 |
| <b>TS6A</b>                                      | 0.551070 | 0.593944 | 0.468084  | -2215.748422 | -2215.154478 | -2215.280338 |
| <b>INT6A</b>                                     | 0.555708 | 0.599091 | 0.473419  | -2215.781538 | -2215.182447 | -2215.308119 |
| <b>INT7A</b>                                     | 0.791238 | 0.841733 | 0.702082  | -2529.098858 | -2528.257125 | -2528.396776 |
| <b>C<sub>s2</sub>CO<sub>3</sub>H<sup>+</sup></b> | 0.028067 | 0.036917 | -0.010438 | -304.694550  | -304.657633  | -304.704988  |
| <b>INT7B</b>                                     | 0.804183 | 0.854974 | 0.719032  | -2947.045562 | -2946.190588 | -2946.326530 |
| <b>TS8A-E</b>                                    | 0.790291 | 0.839763 | 0.702686  | -2529.055621 | -2528.215858 | -2528.352935 |
| <b>INT8A-E</b>                                   | 0.793848 | 0.843076 | 0.707000  | -2529.120308 | -2528.277232 | -2528.413308 |
| <b>TS8A-Z</b>                                    | 0.790948 | 0.840049 | 0.706023  | -2529.055092 | -2528.215043 | -2528.349069 |
| <b>INT8A-Z</b>                                   | 0.794232 | 0.843276 | 0.708672  | -2529.124245 | -2528.280969 | -2528.415573 |
| <b>TS8B-E</b>                                    | 0.792002 | 0.841121 | 0.705999  | -2529.046492 | -2528.205371 | -2528.340493 |
| <b>INT8B-E</b>                                   | 0.793753 | 0.843365 | 0.706210  | -2529.106010 | -2528.262645 | -2528.399800 |
| <b>TS8B-Z</b>                                    | 0.791291 | 0.840387 | 0.706938  | -2529.055333 | -2528.214946 | -2528.348395 |
| <b>INT8B-Z</b>                                   | 0.795800 | 0.844657 | 0.711261  | -2529.138212 | -2528.293555 | -2528.426951 |
| <b>TS9A</b>                                      | 0.791683 | 0.840987 | 0.702899  | -2529.096766 | -2528.255779 | -2528.393867 |

|              |          |          |           |              |              |              |
|--------------|----------|----------|-----------|--------------|--------------|--------------|
| <b>3aa</b>   | 0.519951 | 0.549661 | 0.458428  | -1365.268211 | -1364.718550 | -1364.809783 |
| <b>4aa</b>   | 0.519429 | 0.549343 | 0.456486  | -1365.272064 | -1364.722721 | -1364.815578 |
| <b>INT5C</b> | 0.804837 | 0.855198 | 0.716954  | -2529.567750 | -2528.712552 | -2528.850796 |
| <b>TS6C</b>  | 0.805941 | 0.855091 | 0.721174  | -2529.562913 | -2528.707822 | -2528.841739 |
| <b>INT6C</b> | 0.808709 | 0.857456 | 0.724368  | -2529.581637 | -2528.724181 | -2528.857269 |
| <b>TS6D</b>  | 0.805115 | 0.854781 | 0.717765  | -2529.543512 | -2528.688731 | -2528.825747 |
| <b>INT6D</b> | 0.808512 | 0.858089 | 0.721568  | -2529.615649 | -2528.757560 | -2528.894081 |
| <b>TS7C</b>  | 0.806578 | 0.855686 | 0.719456  | -2529.558944 | -2528.703258 | -2528.839488 |
| <b>INT7C</b> | 0.809329 | 0.858393 | 0.723287  | -2529.628953 | -2528.770560 | -2528.905666 |
| <b>TS8C</b>  | 0.804346 | 0.853340 | 0.716935  | -2529.598812 | -2528.745472 | -2528.881877 |
| <b>INT8C</b> | 0.561765 | 0.600315 | 0.484136  | -2660.683616 | -2660.083301 | -2660.199480 |
| <b>TS9C</b>  | 0.559069 | 0.597122 | 0.484263  | -2660.657282 | -2660.060160 | -2660.173019 |
| HCl          | 0.006665 | 0.009970 | -0.011228 | -460.798303  | -460.788333  | -460.809531  |
| <b>INT8D</b> | 0.561264 | 0.600128 | 0.483114  | -2211.887936 | -2211.287808 | -2211.404822 |
| <b>TS9D</b>  | 0.558212 | 0.596801 | 0.479892  | -2211.859550 | -2211.262749 | -2211.379658 |
| HI           | 0.004933 | 0.008238 | -0.015230 | -11.989499   | -11.981261   | -12.004729   |
| <b>5aa</b>   | 0.519344 | 0.549210 | 0.457143  | -1365.267022 | -1364.717812 | -1364.809879 |

**Note:** ZPE = zero-point vibrational energy in the gas phase;  $H_{\text{corr}}$  = thermal correction to enthalpy in the gas phase;  $G_{\text{corr}}$  = thermal correction to Gibbs free energy in the gas phase;  $E_{\text{ele}}$  = the electronic energies in solvent;  $H_{\text{sol}}$  = enthalpies in solvent;  $G_{\text{sol}}$  = Gibbs free energies in solvent.

**DFT-Computed Cartesian Coordinate (unit: angstrom)**

|           |           |          |           |   |           |           |           |
|-----------|-----------|----------|-----------|---|-----------|-----------|-----------|
| <b>1a</b> |           |          |           | H | 2.247867  | 2.941503  | 1.701640  |
| C         | 1.371969  | 2.445429 | 1.295016  | H | 1.810363  | 0.551430  | 2.229986  |
| C         | 1.125050  | 1.112650 | 1.604190  | H | -1.304703 | 3.021657  | -0.725403 |
| C         | 0.020642  | 0.433940 | 1.069371  | H | 0.690636  | 4.167839  | 0.183661  |
| C         | -0.862540 | 1.149556 | 0.247543  | I | -2.651757 | 0.225293  | -0.516148 |
| C         | -0.619516 | 2.485758 | -0.077864 | N | -0.169930 | -0.940325 | 1.404592  |
| C         | 0.503164  | 3.129629 | 0.442722  | C | 0.004540  | -1.970450 | 0.491123  |

|              |           |           |           |   |           |           |           |
|--------------|-----------|-----------|-----------|---|-----------|-----------|-----------|
| O            | -0.410209 | -3.101268 | 0.710442  | H | -5.080489 | -0.087903 | -1.310904 |
| C            | 0.739943  | -1.623527 | -0.785710 | H | -1.677406 | -2.695394 | -0.935460 |
| C            | 0.206673  | -2.044829 | -1.939702 | H | -2.973873 | -4.535942 | -1.979865 |
| H            | -0.732021 | -2.588409 | -1.953311 | H | -5.320686 | -4.145613 | -2.711231 |
| H            | 0.700092  | -1.862824 | -2.890270 | C | -3.160485 | 1.581963  | -0.573528 |
| C            | 2.025954  | -0.886019 | -0.714396 | C | -4.218146 | 2.066918  | 0.210092  |
| C            | 2.995353  | -1.249298 | 0.234413  | C | -2.760901 | 2.310640  | -1.705505 |
| C            | 2.293012  | 0.187343  | -1.576806 | C | -4.868615 | 3.252808  | -0.138215 |
| C            | 4.201257  | -0.554869 | 0.318124  | H | -4.531027 | 1.521782  | 1.095758  |
| H            | 2.797470  | -2.081355 | 0.905317  | C | -3.417997 | 3.489876  | -2.057209 |
| C            | 3.497316  | 0.884831  | -1.489952 | H | -1.924438 | 1.951544  | -2.300870 |
| H            | 1.531755  | 0.494208  | -2.288054 | C | -4.472967 | 3.964041  | -1.273040 |
| C            | 4.454585  | 0.517983  | -0.541062 | H | -5.684196 | 3.620984  | 0.478923  |
| H            | 4.944682  | -0.851469 | 1.053455  | H | -3.099338 | 4.043888  | -2.936320 |
| H            | 3.683261  | 1.723481  | -2.155703 | H | -4.979378 | 4.887546  | -1.541280 |
| H            | 5.391101  | 1.064640  | -0.470268 | C | -2.613487 | -0.269408 | 1.585839  |
| C            | -0.884206 | -1.224018 | 2.650310  | C | -1.708656 | 0.256601  | 2.523201  |
| H            | -0.467388 | -0.607984 | 3.452398  | C | -3.728643 | -0.985166 | 2.046064  |
| H            | -1.954290 | -1.003959 | 2.547840  | C | -1.918699 | 0.077559  | 3.890143  |
| H            | -0.763681 | -2.281527 | 2.884974  | H | -0.827825 | 0.788446  | 2.173432  |
|              |           |           |           | C | -3.934714 | -1.167676 | 3.416068  |
| <b>INT1A</b> |           |           |           | H | -4.433380 | -1.407123 | 1.335647  |
| C            | -5.340308 | -2.091023 | -2.054990 | C | -3.032306 | -0.637128 | 4.340183  |
| C            | -4.616036 | -1.059200 | -1.452540 | H | -1.203259 | 0.484737  | 4.599885  |
| C            | -3.294062 | -1.271867 | -1.035196 | H | -4.800229 | -1.728544 | 3.759528  |
| C            | -2.709516 | -2.533027 | -1.238265 | H | -3.192494 | -0.785427 | 5.404982  |
| C            | -3.437918 | -3.564577 | -1.830011 | P | -2.258039 | 0.014184  | -0.208256 |
| C            | -4.755366 | -3.344990 | -2.241453 | C | 4.994494  | -3.126835 | -0.587467 |
| H            | -6.362769 | -1.912976 | -2.378284 | C | 4.303332  | -2.024128 | -0.080498 |

|   |          |           |           |             |           |           |           |
|---|----------|-----------|-----------|-------------|-----------|-----------|-----------|
| C | 3.217944 | -1.482348 | -0.785712 | H           | 6.299229  | 2.350459  | -2.045859 |
| C | 2.832038 | -2.071368 | -2.000510 | H           | 5.164604  | 4.562224  | -2.104740 |
| C | 3.529527 | -3.166896 | -2.509886 | P           | 2.260840  | -0.013241 | -0.211621 |
| C | 4.612139 | -3.697354 | -1.803510 | Pd          | 0.000985  | 0.002056  | -0.610684 |
| H | 5.831359 | -3.540416 | -0.030511 |             |           |           |           |
| H | 4.606059 | -1.588498 | 0.867338  | <b>TS2A</b> |           |           |           |
| H | 1.974307 | -1.671168 | -2.536379 | C           | -3.825638 | 2.247139  | 2.050519  |
| H | 3.220955 | -3.613174 | -3.451638 | C           | -2.794648 | 2.455661  | 1.131998  |
| H | 5.150415 | -4.556499 | -2.195145 | C           | -1.483627 | 2.072235  | 1.442703  |
| C | 2.609413 | 0.029935  | 1.605276  | C           | -1.226344 | 1.488068  | 2.695070  |
| C | 3.680799 | 0.737529  | 2.169982  | C           | -2.255017 | 1.298365  | 3.615202  |
| C | 1.739660 | -0.676727 | 2.453006  | C           | -3.563096 | 1.668851  | 3.292308  |
| C | 3.877924 | 0.735698  | 3.553586  | H           | -4.840259 | 2.527767  | 1.782930  |
| H | 4.358315 | 1.298116  | 1.532772  | H           | -3.029260 | 2.885352  | 0.165431  |
| C | 1.941318 | -0.681850 | 3.832776  | H           | -0.220026 | 1.176484  | 2.949727  |
| H | 0.891525 | -1.205028 | 2.025294  | H           | -2.030864 | 0.844658  | 4.577057  |
| C | 3.010792 | 0.027074  | 4.387307  | H           | -4.372025 | 1.498100  | 3.997365  |
| H | 4.709073 | 1.292709  | 3.978549  | C           | -0.658456 | 3.350322  | -1.026877 |
| H | 1.253199 | -1.227739 | 4.473009  | C           | -0.199156 | 4.675068  | -1.040834 |
| H | 3.163479 | 0.032264  | 5.463435  | C           | -1.572898 | 2.934881  | -2.007379 |
| C | 3.245340 | 1.412012  | -0.851440 | C           | -0.648713 | 5.564174  | -2.019547 |
| C | 2.608809 | 2.663408  | -0.899427 | H           | 0.506342  | 5.013310  | -0.287962 |
| C | 4.580350 | 1.311510  | -1.269694 | C           | -2.038738 | 3.829961  | -2.969564 |
| C | 3.298543 | 3.792720  | -1.339966 | H           | -1.928097 | 1.910937  | -2.000087 |
| H | 1.567241 | 2.741874  | -0.595548 | C           | -1.570330 | 5.146315  | -2.982603 |
| C | 5.266175 | 2.442185  | -1.720241 | H           | -0.282809 | 6.587818  | -2.024448 |
| H | 5.085422 | 0.350480  | -1.247972 | H           | -2.760503 | 3.495691  | -3.710164 |
| C | 4.629252 | 3.684205  | -1.752963 | H           | -1.921126 | 5.842886  | -3.739571 |
| H | 2.794138 | 4.755002  | -1.370476 | C           | 1.264534  | 2.934747  | 1.087860  |

|   |           |           |           |    |           |           |           |
|---|-----------|-----------|-----------|----|-----------|-----------|-----------|
| C | 2.545048  | 2.803987  | 0.531289  | C  | 1.025322  | -0.183085 | 5.021030  |
| C | 1.120093  | 3.659984  | 2.279363  | H  | 2.547000  | 1.345875  | 4.952055  |
| C | 3.663697  | 3.348045  | 1.160648  | H  | -0.460280 | -1.725110 | 4.737663  |
| H | 2.665502  | 2.247961  | -0.390503 | H  | 0.716164  | 0.048057  | 6.036671  |
| C | 2.239361  | 4.203719  | 2.914646  | C  | 3.876637  | -0.402238 | 0.299659  |
| H | 0.138070  | 3.785165  | 2.723355  | C  | 4.109279  | 0.242278  | -0.923519 |
| C | 3.513433  | 4.042103  | 2.364250  | C  | 4.943491  | -0.554932 | 1.199366  |
| H | 4.647156  | 3.205220  | 0.720940  | C  | 5.371859  | 0.757741  | -1.227801 |
| H | 2.113485  | 4.753491  | 3.844016  | H  | 3.292332  | 0.346077  | -1.633932 |
| H | 4.382266  | 4.456810  | 2.868814  | C  | 6.200328  | -0.028323 | 0.902920  |
| P | -0.119565 | 2.089023  | 0.201764  | H  | 4.788298  | -1.083436 | 2.135597  |
| C | 2.656955  | -5.235267 | 1.290201  | C  | 6.416218  | 0.633776  | -0.309841 |
| C | 2.347361  | -3.887884 | 1.497915  | H  | 5.534965  | 1.257998  | -2.178755 |
| C | 2.681118  | -2.918994 | 0.541569  | H  | 7.014387  | -0.141499 | 1.614115  |
| C | 3.358977  | -3.340624 | -0.618243 | H  | 7.397203  | 1.040688  | -0.540740 |
| C | 3.669080  | -4.682963 | -0.825164 | P  | 2.198787  | -1.121727 | 0.608251  |
| C | 3.310287  | -5.641805 | 0.127022  | Pd | 0.496778  | -0.061629 | -0.647433 |
| H | 2.390569  | -5.966149 | 2.049626  | I  | 0.394274  | -0.006504 | -3.484457 |
| H | 1.862745  | -3.601430 | 2.423540  | C  | -1.370048 | -4.211653 | -1.339218 |
| H | 3.659073  | -2.607981 | -1.363351 | C  | -2.222187 | -3.120416 | -1.465140 |
| H | 4.194896  | -4.979529 | -1.729137 | C  | -1.751138 | -1.855897 | -1.856800 |
| H | 3.548455  | -6.689933 | -0.032356 | C  | -0.371277 | -1.713911 | -2.132716 |
| C | 1.838404  | -0.787657 | 2.387822  | C  | 0.465867  | -2.841020 | -2.093714 |
| C | 2.464844  | 0.237708  | 3.114528  | C  | -0.014350 | -4.068778 | -1.655520 |
| C | 0.756778  | -1.462888 | 2.985410  | H  | -1.764245 | -5.172170 | -1.020283 |
| C | 2.057161  | 0.537062  | 4.416919  | H  | -3.280830 | -3.218398 | -1.243600 |
| H | 3.252906  | 0.828912  | 2.662261  | H  | 1.506415  | -2.735402 | -2.368730 |
| C | 0.370544  | -1.182048 | 4.295073  | H  | 0.674994  | -4.902841 | -1.561560 |
| H | 0.193137  | -2.193401 | 2.412637  | N  | -2.684142 | -0.778486 | -1.969388 |

|              |           |           |           |   |           |           |           |
|--------------|-----------|-----------|-----------|---|-----------|-----------|-----------|
| C            | -3.441498 | -0.272051 | -0.930864 | H | 4.008019  | 5.089522  | -1.226954 |
| O            | -4.208175 | 0.666506  | -1.152202 | H | 2.131988  | 4.356366  | 0.195196  |
| C            | -3.394459 | -0.920538 | 0.432316  | H | 1.015336  | 1.453263  | -2.781770 |
| C            | -2.261042 | -1.093814 | 1.123285  | H | 2.900979  | 2.175282  | -4.195146 |
| H            | -1.285187 | -0.830031 | 0.720999  | H | 4.413373  | 3.998824  | -3.426140 |
| H            | -2.284145 | -1.467009 | 2.142065  | C | 0.300768  | 2.994530  | 1.457691  |
| C            | -4.703199 | -1.351792 | 1.001923  | C | -0.558925 | 3.849021  | 2.159716  |
| C            | -5.859037 | -0.553235 | 0.954222  | C | 1.441323  | 2.484658  | 2.097936  |
| C            | -4.783458 | -2.608831 | 1.627127  | C | -0.266266 | 4.195528  | 3.480545  |
| C            | -7.047430 | -0.996183 | 1.534134  | H | -1.461200 | 4.223184  | 1.689373  |
| H            | -5.808515 | 0.409778  | 0.463127  | C | 1.724766  | 2.823034  | 3.418946  |
| C            | -5.973417 | -3.048130 | 2.207736  | H | 2.114383  | 1.820748  | 1.569931  |
| H            | -3.905289 | -3.248972 | 1.640021  | C | 0.869272  | 3.683464  | 4.112569  |
| C            | -7.111699 | -2.241141 | 2.165326  | H | -0.938778 | 4.856993  | 4.019846  |
| H            | -7.929178 | -0.361423 | 1.494778  | H | 2.605815  | 2.400251  | 3.892499  |
| H            | -6.012783 | -4.025386 | 2.682394  | H | 1.083336  | 3.949448  | 5.144343  |
| H            | -8.041745 | -2.581757 | 2.612957  | C | -1.295308 | 3.504106  | -0.988749 |
| C            | -3.087975 | -0.339718 | -3.316648 | C | -2.406758 | 2.988629  | -1.667731 |
| H            | -2.783833 | 0.689217  | -3.519354 | C | -1.085368 | 4.891862  | -0.970029 |
| H            | -2.617502 | -0.997749 | -4.047464 | C | -3.297940 | 3.847688  | -2.312821 |
| H            | -4.176912 | -0.399350 | -3.403120 | H | -2.590133 | 1.919887  | -1.666465 |
|              |           |           |           | C | -1.984973 | 5.749037  | -1.602184 |
| <b>INT2A</b> |           |           |           | H | -0.219055 | 5.303046  | -0.460278 |
| C            | 3.350691  | 4.296492  | -1.572844 | C | -3.092310 | 5.227617  | -2.276948 |
| C            | 2.285362  | 3.885607  | -0.770024 | H | -4.160463 | 3.435986  | -2.829698 |
| C            | 1.432429  | 2.853970  | -1.195635 | H | -1.818937 | 6.822479  | -1.571672 |
| C            | 1.659439  | 2.254590  | -2.442681 | H | -3.791638 | 5.896145  | -2.771898 |
| C            | 2.728747  | 2.663208  | -3.239813 | P | -0.061510 | 2.369419  | -0.225924 |
| C            | 3.577395  | 3.684340  | -2.807198 | C | -1.143912 | -4.572225 | -3.260575 |

|   |           |           |           |    |           |           |           |
|---|-----------|-----------|-----------|----|-----------|-----------|-----------|
| C | -1.763189 | -3.642280 | -2.421453 | H  | -1.741726 | -2.355385 | 4.865009  |
| C | -1.175935 | -3.291818 | -1.198726 | H  | -2.589140 | -6.016891 | 2.764411  |
| C | 0.036008  | -3.897233 | -0.827442 | H  | -2.241323 | -4.793948 | 4.903521  |
| C | 0.651562  | -4.821451 | -1.666079 | P  | -1.891790 | -2.003013 | -0.091030 |
| C | 0.064303  | -5.160274 | -2.888293 | Pd | -0.836936 | 0.139162  | -0.078923 |
| H | -1.612127 | -4.835945 | -4.205252 | I  | -2.999601 | 1.115229  | 1.427990  |
| H | -2.704263 | -3.195828 | -2.723598 | C  | 2.696546  | -2.100625 | -2.576666 |
| H | 0.508898  | -3.636363 | 0.113205  | C  | 2.902613  | -1.827107 | -1.229162 |
| H | 1.596539  | -5.267630 | -1.370085 | C  | 1.976598  | -1.073190 | -0.486834 |
| H | 0.547742  | -5.878764 | -3.544725 | C  | 0.758010  | -0.674932 | -1.077337 |
| C | -3.610226 | -1.807916 | -0.710190 | C  | 0.569637  | -0.982823 | -2.436877 |
| C | -4.709107 | -2.441775 | -0.120975 | C  | 1.525807  | -1.659190 | -3.193355 |
| C | -3.812239 | -0.969210 | -1.818460 | H  | 3.434803  | -2.675176 | -3.129371 |
| C | -5.992198 | -2.239102 | -0.634639 | H  | 3.795012  | -2.198115 | -0.737446 |
| H | -4.572100 | -3.075999 | 0.748433  | H  | -0.364070 | -0.699714 | -2.917900 |
| C | -5.090963 | -0.779827 | -2.337225 | H  | 1.335609  | -1.875123 | -4.241473 |
| H | -2.965314 | -0.454031 | -2.265025 | N  | 2.301075  | -0.767458 | 0.881773  |
| C | -6.186103 | -1.412558 | -1.741982 | C  | 3.507648  | -0.259784 | 1.313843  |
| H | -6.841323 | -2.725258 | -0.162154 | O  | 3.709339  | -0.034053 | 2.510692  |
| H | -5.235094 | -0.127193 | -3.194096 | C  | 4.612556  | 0.028319  | 0.325693  |
| H | -7.186312 | -1.254865 | -2.136034 | C  | 4.522546  | 1.073217  | -0.504090 |
| C | -2.006398 | -2.896461 | 1.512242  | H  | 3.623219  | 1.668378  | -0.573796 |
| C | -1.811837 | -2.214106 | 2.721938  | H  | 5.354704  | 1.365512  | -1.137741 |
| C | -2.283612 | -4.275060 | 1.540248  | C  | 5.815154  | -0.844116 | 0.394677  |
| C | -1.896367 | -2.897366 | 3.936303  | C  | 6.310020  | -1.340943 | 1.612904  |
| H | -1.608755 | -1.149873 | 2.715737  | C  | 6.472311  | -1.205759 | -0.795347 |
| C | -2.372622 | -4.952075 | 2.756066  | C  | 7.443017  | -2.154411 | 1.635324  |
| H | -2.419668 | -4.820816 | 0.611615  | H  | 5.808615  | -1.068252 | 2.534485  |
| C | -2.177401 | -4.264296 | 3.956758  | C  | 7.605817  | -2.017105 | -0.768302 |

|                  |           |           |           |              |           |           |           |
|------------------|-----------|-----------|-----------|--------------|-----------|-----------|-----------|
| H                | 6.069426  | -0.865570 | -1.745260 | H            | 2.698493  | 0.730162  | -1.925840 |
| C                | 8.097601  | -2.493895 | 0.449009  | C            | 4.140053  | -0.886306 | 0.696212  |
| H                | 7.817839  | -2.522061 | 2.587133  | H            | 3.072100  | -2.039314 | 2.173091  |
| H                | 8.097048  | -2.287298 | -1.699648 | H            | 4.917971  | 0.317120  | -0.917350 |
| H                | 8.978211  | -3.130454 | 0.471832  | H            | 5.116270  | -1.077120 | 1.134200  |
| C                | 1.335761  | -1.087766 | 1.940534  | C            | -1.148996 | -1.195829 | -0.437330 |
| H                | 0.702287  | -0.228963 | 2.187397  | C            | -1.277886 | -2.466409 | -1.022223 |
| H                | 0.706596  | -1.911940 | 1.611156  | C            | -1.887942 | -0.910107 | 0.720881  |
| H                | 1.884299  | -1.377347 | 2.838169  | C            | -2.109903 | -3.432227 | -0.456342 |
|                  |           |           |           | H            | -0.722026 | -2.699755 | -1.927688 |
| PPh <sub>3</sub> |           |           |           | C            | -2.729491 | -1.873462 | 1.280916  |
| C                | -0.258514 | 3.304581  | 1.275245  | H            | -1.805311 | 0.067038  | 1.186832  |
| C                | 0.159799  | 2.095595  | 0.715366  | C            | -2.840428 | -3.136611 | 0.696841  |
| C                | -0.459562 | 1.593051  | -0.439082 | H            | -2.194486 | -4.411739 | -0.919868 |
| C                | -1.502496 | 2.332917  | -1.020470 | H            | -3.297003 | -1.636332 | 2.177337  |
| C                | -1.928006 | 3.534386  | -0.454342 | H            | -3.496005 | -3.884897 | 1.134486  |
| C                | -1.304325 | 4.024826  | 0.695196  |              |           |           |           |
| H                | 0.232686  | 3.681952  | 2.168659  | <b>INT3A</b> |           |           |           |
| H                | 0.970157  | 1.540992  | 1.178699  | C            | 1.245533  | 4.267813  | 3.165732  |
| H                | -1.984385 | 1.964082  | -1.923285 | C            | 0.804110  | 3.825105  | 1.919326  |
| H                | -2.739667 | 4.091629  | -0.914937 | C            | 0.597865  | 2.453812  | 1.689760  |
| H                | -1.628600 | 4.965123  | 1.133287  | C            | 0.801926  | 1.544015  | 2.737224  |
| P                | 0.001501  | -0.001009 | -1.261950 | C            | 1.233647  | 1.991265  | 3.986532  |
| C                | 1.612298  | -0.398322 | -0.438455 | C            | 1.463035  | 3.352103  | 4.199495  |
| C                | 1.736562  | -1.183593 | 0.717796  | H            | 1.409535  | 5.328243  | 3.332919  |
| C                | 2.775732  | 0.130522  | -1.021522 | H            | 0.609398  | 4.544768  | 1.129712  |
| C                | 2.992211  | -1.427331 | 1.278125  | H            | 0.629655  | 0.483983  | 2.576574  |
| H                | 0.850704  | -1.605563 | 1.182624  | H            | 1.387754  | 1.276889  | 4.790159  |
| C                | 4.028660  | -0.103720 | -0.455311 | H            | 1.798976  | 3.701257  | 5.171543  |



|   |           |           |           |    |           |           |           |
|---|-----------|-----------|-----------|----|-----------|-----------|-----------|
| C | -1.319724 | 3.038120  | -0.379842 | H  | 4.358704  | -3.588566 | 3.689714  |
| C | -1.437732 | 3.574367  | -1.670658 | H  | 4.219813  | -2.358833 | 1.549572  |
| C | -2.262063 | 3.394945  | 0.599937  | H  | -0.059596 | -2.098674 | 1.990214  |
| C | -2.484841 | 4.447487  | -1.975223 | H  | 0.085540  | -3.319632 | 4.133802  |
| H | -0.717564 | 3.325649  | -2.441265 | H  | 2.297138  | -4.070268 | 4.992003  |
| C | -3.306834 | 4.261146  | 0.288733  | C  | 3.395043  | -0.122510 | 0.074405  |
| H | -2.190255 | 2.985921  | 1.600946  | C  | 4.257070  | 0.041421  | -1.018678 |
| C | -3.422999 | 4.789201  | -1.000381 | C  | 3.648673  | 0.601077  | 1.251911  |
| H | -2.561094 | 4.860701  | -2.976855 | C  | 5.344734  | 0.912524  | -0.933856 |
| H | -4.032152 | 4.519805  | 1.054304  | H  | 4.095926  | -0.510899 | -1.936753 |
| H | -4.237112 | 5.466810  | -1.240889 | C  | 4.729966  | 1.476688  | 1.329526  |
| C | 1.310610  | 2.189174  | -1.206910 | H  | 3.016409  | 0.470097  | 2.121049  |
| C | 1.139833  | 1.591707  | -2.469634 | C  | 5.583048  | 1.635716  | 0.234997  |
| C | 2.400308  | 3.038214  | -0.984854 | H  | 6.005788  | 1.022851  | -1.788579 |
| C | 2.039151  | 1.863666  | -3.500219 | H  | 4.908489  | 2.025197  | 2.250147  |
| H | 0.297859  | 0.926668  | -2.653474 | H  | 6.431388  | 2.311365  | 0.296557  |
| C | 3.299391  | 3.300921  | -2.019946 | C  | 2.342856  | -2.451510 | -1.304581 |
| H | 2.566497  | 3.475877  | -0.007436 | C  | 2.192153  | -2.037680 | -2.640898 |
| C | 3.119141  | 2.722225  | -3.276738 | C  | 2.732639  | -3.770601 | -1.037742 |
| H | 1.893646  | 1.406876  | -4.475081 | C  | 2.449470  | -2.921336 | -3.687686 |
| H | 4.148806  | 3.951582  | -1.836207 | H  | 1.867443  | -1.024941 | -2.863192 |
| H | 3.821342  | 2.932270  | -4.078231 | C  | 2.980402  | -4.655336 | -2.090863 |
| P | 0.025625  | 1.861674  | 0.058529  | H  | 2.840203  | -4.116025 | -0.015028 |
| C | 3.391266  | -3.266275 | 3.315774  | C  | 2.843190  | -4.234255 | -3.413975 |
| C | 3.313082  | -2.577868 | 2.105426  | H  | 2.329727  | -2.588861 | -4.714669 |
| C | 2.067792  | -2.157232 | 1.608059  | H  | 3.279951  | -5.676286 | -1.872303 |
| C | 0.910074  | -2.432081 | 2.353216  | H  | 3.034326  | -4.926159 | -4.228856 |
| C | 0.989970  | -3.117303 | 3.567048  | P  | 1.931202  | -1.245406 | 0.017550  |
| C | 2.231336  | -3.537017 | 4.048109  | Pd | -0.404463 | -0.402112 | -0.018719 |

|   |           |           |           |              |           |           |           |
|---|-----------|-----------|-----------|--------------|-----------|-----------|-----------|
| C | -4.829267 | 0.901257  | 1.538215  | H            | -4.785155 | 0.703877  | -2.963434 |
| C | -4.628495 | 0.726083  | 0.169697  | H            | -3.793050 | 2.020860  | -2.276974 |
| C | -3.373622 | 0.340819  | -0.315569 | H            | -3.146389 | 0.993537  | -3.586309 |
| C | -2.299154 | 0.161562  | 0.571304  |              |           |           |           |
| C | -2.524340 | 0.296109  | 1.943813  | <b>INT3B</b> |           |           |           |
| C | -3.784600 | 0.663040  | 2.431526  | C            | 3.359458  | 2.072692  | 3.497978  |
| H | -5.807536 | 1.197674  | 1.904704  | C            | 2.856207  | 1.957604  | 2.201715  |
| H | -5.454210 | 0.853669  | -0.523944 | C            | 2.136651  | 0.812659  | 1.821666  |
| H | -1.709338 | 0.155154  | 2.648466  | C            | 1.933302  | -0.214728 | 2.756517  |
| H | -3.937060 | 0.780473  | 3.500835  | C            | 2.439719  | -0.094044 | 4.051139  |
| N | -3.189900 | 0.098615  | -1.703035 | C            | 3.150354  | 1.048545  | 4.424702  |
| C | -2.434167 | -0.964202 | -2.146081 | H            | 3.913287  | 2.963079  | 3.782730  |
| O | -2.027387 | -1.063939 | -3.299579 | H            | 3.017540  | 2.761183  | 1.490008  |
| C | -2.128917 | -2.057990 | -1.117972 | H            | 1.395488  | -1.112073 | 2.465780  |
| C | -0.878722 | -2.603633 | -1.174314 | H            | 2.277873  | -0.896119 | 4.765693  |
| H | -0.217611 | -2.331348 | -1.986758 | H            | 3.540937  | 1.141294  | 5.434460  |
| H | -0.609161 | -3.473185 | -0.583552 | C            | 1.165515  | 2.302192  | -0.498179 |
| C | -3.215789 | -2.629368 | -0.287098 | C            | 1.438494  | 2.638375  | -1.832948 |
| C | -4.525815 | -2.665928 | -0.789933 | C            | 0.553441  | 3.257353  | 0.330571  |
| C | -2.956300 | -3.202009 | 0.968284  | C            | 1.107387  | 3.901838  | -2.326112 |
| C | -5.547526 | -3.271406 | -0.059771 | H            | 1.915008  | 1.921510  | -2.492300 |
| H | -4.744612 | -2.231858 | -1.761199 | C            | 0.227111  | 4.518425  | -0.164871 |
| C | -3.979121 | -3.795646 | 1.701707  | H            | 0.314526  | 3.014078  | 1.359094  |
| H | -1.951675 | -3.163524 | 1.378961  | C            | 0.501170  | 4.845632  | -1.495131 |
| C | -5.279400 | -3.833798 | 1.189162  | H            | 1.327625  | 4.145608  | -3.361805 |
| H | -6.553608 | -3.301562 | -0.467590 | H            | -0.253173 | 5.239637  | 0.490207  |
| H | -3.764952 | -4.224942 | 2.676353  | H            | 0.244167  | 5.828510  | -1.880816 |
| H | -6.077403 | -4.297055 | 1.761896  | C            | 2.911851  | 0.042474  | -0.910131 |
| C | -3.768468 | 1.012560  | -2.691180 | C            | 2.648551  | -0.546680 | -2.156964 |

|    |           |           |           |             |           |           |           |
|----|-----------|-----------|-----------|-------------|-----------|-----------|-----------|
| C  | 4.238102  | 0.228820  | -0.501126 | C           | -3.625194 | -1.785159 | 1.082975  |
| C  | 3.699379  | -0.924205 | -2.990548 | C           | -4.822976 | -0.503931 | -0.577660 |
| H  | 1.623459  | -0.729550 | -2.466239 | C           | -4.750807 | -1.775796 | 1.902286  |
| C  | 5.287620  | -0.165860 | -1.333315 | H           | -2.709852 | -2.261201 | 1.424528  |
| H  | 4.457801  | 0.665765  | 0.467412  | C           | -5.951044 | -0.497302 | 0.243194  |
| C  | 5.021332  | -0.737566 | -2.578328 | H           | -4.857341 | -0.007993 | -1.543551 |
| H  | 3.484123  | -1.383765 | -3.950876 | C           | -5.919464 | -1.131507 | 1.485687  |
| H  | 6.313789  | -0.029579 | -1.003200 | H           | -4.712234 | -2.262649 | 2.872984  |
| H  | 5.840479  | -1.046329 | -3.221925 | H           | -6.854332 | 0.005987  | -0.090740 |
| P  | 1.494749  | 0.593890  | 0.120159  | H           | -6.795727 | -1.120268 | 2.128007  |
| Pd | -0.293640 | -0.861048 | -0.069516 | C           | -2.289029 | 2.252247  | -2.698391 |
| C  | -2.930828 | 2.884252  | 1.535757  | H           | -3.301069 | 2.643244  | -2.864741 |
| C  | -2.958249 | 2.582373  | 0.174707  | H           | -1.640569 | 3.060394  | -2.353912 |
| C  | -2.218885 | 1.503332  | -0.325990 | H           | -1.912906 | 1.847425  | -3.637803 |
| C  | -1.421822 | 0.733579  | 0.536897  | I           | 1.259214  | -3.153734 | 0.102599  |
| C  | -1.445258 | 1.014653  | 1.906003  |             |           |           |           |
| C  | -2.190804 | 2.087553  | 2.409542  | <b>TS4A</b> |           |           |           |
| H  | -3.507507 | 3.724708  | 1.912027  | C           | 1.910842  | 3.975549  | 3.281461  |
| H  | -3.575924 | 3.168595  | -0.499384 | C           | 1.401547  | 3.656960  | 2.022904  |
| H  | -0.844787 | 0.422136  | 2.591098  | C           | 0.989528  | 2.343849  | 1.736314  |
| H  | -2.176207 | 2.303481  | 3.474701  | C           | 1.054698  | 1.373474  | 2.747811  |
| N  | -2.290501 | 1.178941  | -1.705301 | C           | 1.556975  | 1.695799  | 4.009734  |
| C  | -2.279863 | -0.128775 | -2.146074 | C           | 1.994222  | 2.994874  | 4.274755  |
| O  | -2.146867 | -0.426915 | -3.329113 | H           | 2.233879  | 4.991265  | 3.490270  |
| C  | -2.477896 | -1.213690 | -1.091003 | H           | 1.307150  | 4.433674  | 1.269913  |
| C  | -1.736892 | -2.358031 | -1.236088 | H           | 0.720887  | 0.359698  | 2.546304  |
| H  | -1.072297 | -2.477168 | -2.084247 | H           | 1.605364  | 0.932489  | 4.781208  |
| H  | -1.943313 | -3.244496 | -0.647623 | H           | 2.387189  | 3.247607  | 5.255307  |
| C  | -3.648722 | -1.153144 | -0.170468 | C           | -0.982239 | 3.155046  | -0.202603 |

|   |           |           |           |    |           |           |           |
|---|-----------|-----------|-----------|----|-----------|-----------|-----------|
| C | -1.314253 | 3.543053  | -1.510986 | H  | 4.076952  | -2.698885 | 1.347981  |
| C | -1.681062 | 3.724439  | 0.872099  | H  | -0.126196 | -2.125009 | 2.096165  |
| C | -2.318098 | 4.485651  | -1.734971 | H  | 0.085058  | -3.363292 | 4.228816  |
| H | -0.779500 | 3.129811  | -2.359442 | H  | 2.289835  | -4.283754 | 4.919751  |
| C | -2.680488 | 4.670911  | 0.643372  | C  | 3.325464  | -0.416722 | -0.079103 |
| H | -1.450484 | 3.432054  | 1.890569  | C  | 4.082817  | -0.298765 | -1.253124 |
| C | -3.003716 | 5.053854  | -0.658441 | C  | 3.754760  | 0.251578  | 1.079781  |
| H | -2.551735 | 4.787955  | -2.752261 | C  | 5.247978  | 0.468682  | -1.262692 |
| H | -3.207725 | 5.105748  | 1.487696  | H  | 3.777751  | -0.809017 | -2.159254 |
| H | -3.778428 | 5.794608  | -0.834315 | C  | 4.916654  | 1.021270  | 1.063488  |
| C | 1.556746  | 2.203552  | -1.198803 | H  | 3.196591  | 0.160317  | 2.003557  |
| C | 1.310228  | 1.640785  | -2.464584 | C  | 5.668898  | 1.129621  | -0.107983 |
| C | 2.697923  | 2.992531  | -1.015946 | H  | 5.825895  | 0.548051  | -2.178649 |
| C | 2.170170  | 1.892052  | -3.533205 | H  | 5.235095  | 1.527639  | 1.970233  |
| H | 0.439206  | 1.006013  | -2.615174 | H  | 6.578775  | 1.722907  | -0.120033 |
| C | 3.560225  | 3.236532  | -2.086468 | C  | 1.984456  | -2.644357 | -1.374066 |
| H | 2.935983  | 3.396865  | -0.039438 | C  | 1.669033  | -2.227609 | -2.679682 |
| C | 3.295811  | 2.697705  | -3.346237 | C  | 2.397640  | -3.965096 | -1.156778 |
| H | 1.962525  | 1.457190  | -4.506946 | C  | 1.786699  | -3.111416 | -3.750766 |
| H | 4.447160  | 3.843135  | -1.929271 | H  | 1.324010  | -1.212236 | -2.855418 |
| H | 3.969223  | 2.893874  | -4.175514 | C  | 2.504443  | -4.850302 | -2.232664 |
| P | 0.305234  | 1.870688  | 0.106631  | H  | 2.629658  | -4.311695 | -0.155395 |
| C | 3.314114  | -3.554731 | 3.167057  | C  | 2.203706  | -4.426784 | -3.527740 |
| C | 3.198191  | -2.854860 | 1.966375  | H  | 1.538242  | -2.778506 | -4.754188 |
| C | 1.953828  | -2.340718 | 1.561679  | H  | 2.820917  | -5.873850 | -2.053982 |
| C | 0.837381  | -2.531126 | 2.390828  | H  | 2.284851  | -5.119786 | -4.359920 |
| C | 0.956991  | -3.226430 | 3.595373  | P  | 1.782576  | -1.422056 | -0.020397 |
| C | 2.194911  | -3.741797 | 3.983335  | Pd | -0.364037 | -0.408861 | -0.061676 |
| H | 4.280026  | -3.949963 | 3.467669  | C  | -4.450225 | 1.833813  | 1.306259  |

|   |           |           |           |              |           |           |           |
|---|-----------|-----------|-----------|--------------|-----------|-----------|-----------|
| C | -4.329403 | 1.626526  | -0.065116 | H            | -3.462947 | 2.112071  | -2.896494 |
| C | -3.336112 | 0.758899  | -0.531842 | H            | -3.375310 | 0.629738  | -3.899575 |
| C | -2.436393 | 0.143591  | 0.353708  |              |           |           |           |
| C | -2.633356 | 0.292959  | 1.734393  | <b>INT4A</b> |           |           |           |
| C | -3.617039 | 1.158925  | 2.209345  | C            | -0.101087 | -5.452151 | 1.096243  |
| H | -5.219686 | 2.503676  | 1.678058  | C            | -0.761519 | -4.428139 | 0.415279  |
| H | -5.016863 | 2.099641  | -0.758144 | C            | -0.505155 | -3.088109 | 0.739137  |
| H | -1.999676 | -0.238886 | 2.439623  | C            | 0.420814  | -2.785929 | 1.750918  |
| H | -3.735585 | 1.310671  | 3.278219  | C            | 1.071600  | -3.813197 | 2.433826  |
| N | -3.266033 | 0.308349  | -1.857617 | C            | 0.813247  | -5.146653 | 2.107097  |
| C | -2.734139 | -0.950404 | -2.029363 | H            | -0.303675 | -6.487737 | 0.838114  |
| O | -2.491942 | -1.458541 | -3.112889 | H            | -1.473775 | -4.672724 | -0.366941 |
| C | -2.445308 | -1.671604 | -0.704190 | H            | 0.650470  | -1.753436 | 2.001385  |
| C | -1.158862 | -2.297583 | -0.661334 | H            | 1.787203  | -3.564763 | 3.211079  |
| H | -0.682839 | -2.428748 | -1.629639 | H            | 1.324196  | -5.945674 | 2.637002  |
| H | -1.014570 | -3.136641 | 0.014077  | C            | -1.960791 | -2.404281 | -1.699963 |
| C | -3.600964 | -2.270942 | 0.032963  | C            | -3.268759 | -2.867159 | -1.904639 |
| C | -4.893506 | -2.214934 | -0.508037 | C            | -1.043127 | -2.439394 | -2.765835 |
| C | -3.407451 | -2.925641 | 1.260416  | C            | -3.656232 | -3.345607 | -3.158662 |
| C | -5.965871 | -2.807426 | 0.160151  | H            | -3.987541 | -2.849198 | -1.092196 |
| H | -5.066799 | -1.725127 | -1.460885 | C            | -1.435016 | -2.921560 | -4.014049 |
| C | -4.479256 | -3.506804 | 1.929722  | H            | -0.024016 | -2.095264 | -2.614847 |
| H | -2.416666 | -2.964710 | 1.703535  | C            | -2.743731 | -3.370243 | -4.214897 |
| C | -5.764662 | -3.451026 | 1.380877  | H            | -4.672442 | -3.699659 | -3.307075 |
| H | -6.958425 | -2.765591 | -0.278509 | H            | -0.719918 | -2.943254 | -4.831748 |
| H | -4.314120 | -4.005651 | 2.880413  | H            | -3.049063 | -3.739703 | -5.189708 |
| H | -6.600349 | -3.908809 | 1.901738  | C            | -2.913181 | -1.491706 | 0.898047  |
| C | -3.779986 | 1.070379  | -2.987890 | C            | -3.880061 | -0.567799 | 0.467661  |
| H | -4.874932 | 1.026801  | -3.026187 | C            | -3.124040 | -2.196994 | 2.091673  |

|    |           |           |           |   |           |           |           |
|----|-----------|-----------|-----------|---|-----------|-----------|-----------|
| C  | -5.033830 | -0.355152 | 1.218064  | C | 2.209618  | 0.862938  | 2.188219  |
| H  | -3.735978 | -0.015736 | -0.456052 | C | 3.521852  | -1.298185 | 3.361549  |
| C  | -4.279880 | -1.975915 | 2.843356  | H | 4.254735  | -1.729519 | 1.390702  |
| H  | -2.391448 | -2.919020 | 2.435837  | C | 2.085951  | 0.628131  | 3.561272  |
| C  | -5.234786 | -1.055824 | 2.410568  | H | 1.707120  | 1.719948  | 1.756469  |
| H  | -5.771213 | 0.365212  | 0.876310  | C | 2.733560  | -0.456636 | 4.152121  |
| H  | -4.432922 | -2.528714 | 3.765923  | H | 4.045930  | -2.136986 | 3.811141  |
| H  | -6.132761 | -0.884697 | 2.997327  | H | 1.481708  | 1.300471  | 4.164475  |
| P  | -1.388072 | -1.714655 | -0.095230 | H | 2.637855  | -0.638787 | 5.218548  |
| Pd | 0.268482  | 0.046495  | -0.452418 | C | 4.085078  | -2.780277 | -2.207685 |
| C  | 7.171228  | 0.405108  | -1.449108 | H | 4.324826  | -2.529456 | -3.246319 |
| C  | 6.330800  | -0.683679 | -1.724839 | H | 4.868572  | -3.428997 | -1.804614 |
| C  | 5.029562  | -0.611349 | -1.251249 | H | 3.125055  | -3.296151 | -2.165189 |
| C  | 4.548114  | 0.490143  | -0.527844 | C | -3.812202 | 2.724410  | 2.689336  |
| C  | 5.391668  | 1.554288  | -0.251357 | C | -3.111185 | 2.721775  | 1.484429  |
| C  | 6.711401  | 1.508021  | -0.724966 | C | -1.963498 | 1.928645  | 1.338863  |
| H  | 8.196968  | 0.384270  | -1.804421 | C | -1.526181 | 1.146828  | 2.418394  |
| H  | 6.689274  | -1.541687 | -2.284543 | C | -2.230819 | 1.152171  | 3.622169  |
| H  | 5.036076  | 2.405405  | 0.322556  | C | -3.376026 | 1.938389  | 3.758504  |
| H  | 7.383708  | 2.336271  | -0.523486 | H | -4.704600 | 3.335394  | 2.790104  |
| N  | 3.986198  | -1.569309 | -1.408892 | H | -3.473164 | 3.324014  | 0.658420  |
| C  | 2.851016  | -1.104466 | -0.852793 | H | -0.642218 | 0.524587  | 2.315606  |
| O  | 1.710461  | -1.608765 | -0.964721 | H | -1.891160 | 0.531136  | 4.445830  |
| C  | 3.104259  | 0.217324  | -0.137108 | H | -3.930243 | 1.935063  | 4.692557  |
| C  | 2.031751  | 1.164561  | -0.720900 | C | -2.122639 | 2.201307  | -1.612042 |
| H  | 2.078711  | 2.151006  | -0.262898 | C | -2.719780 | 3.455213  | -1.834644 |
| H  | 2.166917  | 1.279806  | -1.802948 | C | -2.428003 | 1.138025  | -2.475914 |
| C  | 2.974896  | 0.009156  | 1.384510  | C | -3.630392 | 3.624712  | -2.877350 |
| C  | 3.639863  | -1.065709 | 1.992452  | H | -2.459874 | 4.303380  | -1.208734 |

|             |           |           |           |   |           |           |           |
|-------------|-----------|-----------|-----------|---|-----------|-----------|-----------|
| C           | -3.340629 | 1.311470  | -3.517669 | H | -1.854341 | 0.000617  | -4.479660 |
| H           | -1.950759 | 0.174142  | -2.347477 | H | -1.459540 | 2.163089  | -5.656102 |
| C           | -3.948314 | 2.552293  | -3.715700 | C | 2.885558  | 0.417520  | -1.509066 |
| H           | -4.086366 | 4.597176  | -3.038897 | C | 4.048184  | 1.196549  | -1.470306 |
| H           | -3.565953 | 0.474803  | -4.172681 | C | 2.899217  | -0.807946 | -2.193500 |
| H           | -4.657010 | 2.689243  | -4.527313 | C | 5.216947  | 0.736304  | -2.080486 |
| C           | -0.043359 | 3.520072  | -0.101369 | H | 4.054346  | 2.151604  | -0.956642 |
| C           | 0.472407  | 4.101100  | -1.272279 | C | 4.066185  | -1.262200 | -2.803659 |
| C           | 0.247732  | 4.101709  | 1.141308  | H | 1.998231  | -1.414048 | -2.237671 |
| C           | 1.258113  | 5.250047  | -1.198399 | C | 5.232302  | -0.494317 | -2.739359 |
| H           | 0.256241  | 3.657550  | -2.240227 | H | 6.117181  | 1.342836  | -2.038124 |
| C           | 1.040872  | 5.249466  | 1.209894  | H | 4.070329  | -2.217754 | -3.319460 |
| H           | -0.151409 | 3.669671  | 2.053685  | H | 6.145606  | -0.852027 | -3.205399 |
| C           | 1.546371  | 5.825010  | 0.043118  | C | 1.608532  | 2.450654  | 0.194214  |
| H           | 1.645857  | 5.696172  | -2.109647 | C | 2.586055  | 2.369793  | 1.202724  |
| H           | 1.255310  | 5.696373  | 2.176395  | C | 0.874558  | 3.636661  | 0.050550  |
| H           | 2.159333  | 6.719876  | 0.098728  | C | 2.838388  | 3.460519  | 2.031814  |
| P           | -0.971335 | 1.940624  | -0.205402 | H | 3.163279  | 1.464855  | 1.329504  |
|             |           |           |           | C | 1.136194  | 4.727405  | 0.881977  |
| <b>TS4B</b> |           |           |           | H | 0.091334  | 3.717588  | -0.691636 |
| C           | -0.029593 | 2.863130  | -4.199692 | C | 2.116560  | 4.646152  | 1.871221  |
| C           | 0.640977  | 2.586974  | -3.008283 | H | 3.602927  | 3.377591  | 2.798732  |
| C           | 0.386200  | 1.393146  | -2.316297 | H | 0.558771  | 5.638001  | 0.754937  |
| C           | -0.495681 | 0.457447  | -2.875628 | H | 2.315962  | 5.498857  | 2.513948  |
| C           | -1.159083 | 0.729357  | -4.072984 | P | 1.280702  | 0.933967  | -0.776045 |
| C           | -0.938295 | 1.941615  | -4.729315 | C | -5.702675 | -0.003225 | -1.505164 |
| H           | 0.163370  | 3.797000  | -4.719819 | C | -4.674682 | 0.412260  | -0.660380 |
| H           | 1.357871  | 3.302741  | -2.619298 | C | -3.430873 | -0.246042 | -0.672766 |
| H           | -0.674015 | -0.485608 | -2.370263 | C | -3.233329 | -1.308657 | -1.566622 |

|   |           |           |           |    |           |           |           |
|---|-----------|-----------|-----------|----|-----------|-----------|-----------|
| C | -4.260952 | -1.714461 | -2.419310 | P  | -2.072275 | 0.350202  | 0.410201  |
| C | -5.497250 | -1.067701 | -2.387189 | Pd | 0.055400  | -0.842704 | 0.394732  |
| H | -6.659332 | 0.510366  | -1.481301 | C  | -2.306150 | -4.954452 | -0.418814 |
| H | -4.833930 | 1.261523  | -0.002622 | C  | -0.993641 | -4.739550 | -0.845248 |
| H | -2.285344 | -1.831995 | -1.593379 | C  | -0.253946 | -3.630760 | -0.396996 |
| H | -4.093070 | -2.540965 | -3.103724 | C  | -0.916663 | -2.687284 | 0.422535  |
| H | -6.296872 | -1.386838 | -3.049411 | C  | -2.181269 | -2.969664 | 0.932243  |
| C | -2.198049 | 2.178135  | 0.171151  | C  | -2.894844 | -4.089553 | 0.498376  |
| C | -2.144517 | 3.070554  | 1.252496  | H  | -2.842104 | -5.828520 | -0.776215 |
| C | -2.397622 | 2.690143  | -1.123901 | H  | -0.532879 | -5.475967 | -1.491833 |
| C | -2.295457 | 4.442603  | 1.044327  | H  | -2.635681 | -2.300886 | 1.652060  |
| H | -2.001162 | 2.706359  | 2.262951  | H  | -3.898104 | -4.270136 | 0.872018  |
| C | -2.539692 | 4.061663  | -1.327135 | N  | 1.132922  | -3.529954 | -0.738101 |
| H | -2.459371 | 2.022421  | -1.974605 | C  | 2.159266  | -3.048483 | 0.094337  |
| C | -2.491308 | 4.943196  | -0.243194 | O  | 3.310404  | -3.397518 | -0.116403 |
| H | -2.260239 | 5.117564  | 1.894414  | C  | 1.836639  | -2.039167 | 1.189658  |
| H | -2.693322 | 4.437276  | -2.334452 | C  | 2.949541  | -1.197008 | 1.742484  |
| H | -2.612552 | 6.010926  | -0.402065 | C  | 4.154712  | -0.982605 | 1.045005  |
| C | -2.595066 | 0.134796  | 2.165399  | C  | 2.836124  | -0.623027 | 3.027676  |
| C | -1.616120 | 0.329673  | 3.157840  | C  | 5.190177  | -0.239050 | 1.612056  |
| C | -3.892740 | -0.227989 | 2.550877  | H  | 4.299985  | -1.409879 | 0.066113  |
| C | -1.933841 | 0.173969  | 4.506577  | C  | 3.869529  | 0.122294  | 3.588790  |
| H | -0.603744 | 0.610853  | 2.873930  | H  | 1.940873  | -0.763680 | 3.622343  |
| C | -4.203412 | -0.395940 | 3.902956  | C  | 5.060040  | 0.317441  | 2.884411  |
| H | -4.658554 | -0.399127 | 1.801979  | H  | 6.103696  | -0.096969 | 1.042616  |
| C | -3.228921 | -0.195070 | 4.881632  | H  | 3.745923  | 0.540346  | 4.583679  |
| H | -1.171432 | 0.337815  | 5.263041  | H  | 5.873199  | 0.887701  | 3.323906  |
| H | -5.210374 | -0.685939 | 4.188646  | C  | 1.609736  | -4.320205 | -1.881332 |
| H | -3.475328 | -0.325754 | 5.931147  | H  | 1.761028  | -5.374663 | -1.623704 |



|              |           |           |           |   |           |           |           |
|--------------|-----------|-----------|-----------|---|-----------|-----------|-----------|
| H            | 0.882646  | -4.239615 | -2.692217 | C | 1.389492  | 2.299950  | 0.351415  |
| H            | 2.566872  | -3.917087 | -2.205902 | C | 1.804459  | 2.058306  | 1.673396  |
| C            | 0.717693  | -2.342801 | 1.999124  | C | 1.026033  | 3.597942  | -0.029292 |
| H            | 0.489146  | -1.754046 | 2.880865  | C | 1.864515  | 3.103837  | 2.592946  |
| H            | 0.338363  | -3.351516 | 2.061643  | H | 2.096265  | 1.062760  | 1.983240  |
|              |           |           |           | C | 1.086511  | 4.639259  | 0.898275  |
| <b>INT4B</b> |           |           |           | H | 0.672269  | 3.801762  | -1.031804 |
| C            | 0.739842  | 2.866178  | -4.330620 | C | 1.505225  | 4.397710  | 2.207205  |
| C            | 1.272887  | 2.439403  | -3.115375 | H | 2.198977  | 2.901860  | 3.606478  |
| C            | 0.646153  | 1.409174  | -2.391532 | H | 0.791490  | 5.638764  | 0.594892  |
| C            | -0.481943 | 0.782187  | -2.935475 | H | 1.549894  | 5.212899  | 2.923710  |
| C            | -1.010007 | 1.205868  | -4.156675 | P | 1.357779  | 0.865382  | -0.789508 |
| C            | -0.406826 | 2.256226  | -4.849842 | C | -5.659362 | 0.384961  | -1.523306 |
| H            | 1.225584  | 3.668666  | -4.877995 | C | -4.614377 | 0.762031  | -0.681343 |
| H            | 2.179169  | 2.900566  | -2.733901 | C | -3.400466 | 0.052759  | -0.702085 |
| H            | -0.949988 | -0.038750 | -2.407599 | C | -3.253331 | -1.033285 | -1.575187 |
| H            | -1.890085 | 0.712156  | -4.558852 | C | -4.300012 | -1.404260 | -2.420959 |
| H            | -0.816924 | 2.590047  | -5.798556 | C | -5.502071 | -0.695720 | -2.397433 |
| C            | 3.099005  | 0.568485  | -1.245303 | H | -6.594419 | 0.937079  | -1.501887 |
| C            | 4.165529  | 1.255844  | -0.645082 | H | -4.736683 | 1.612120  | -0.016954 |
| C            | 3.358239  | -0.360121 | -2.267014 | H | -2.326539 | -1.597716 | -1.591434 |
| C            | 5.472202  | 1.015944  | -1.069180 | H | -4.173151 | -2.248988 | -3.091567 |
| H            | 3.980850  | 1.974441  | 0.145029  | H | -6.315898 | -0.982114 | -3.057413 |
| C            | 4.665274  | -0.596123 | -2.684156 | C | -2.112376 | 2.351011  | 0.428841  |
| H            | 2.538824  | -0.899126 | -2.733061 | C | -2.122288 | 3.074725  | 1.628709  |
| C            | 5.724099  | 0.089168  | -2.083723 | C | -2.198561 | 3.042970  | -0.792870 |
| H            | 6.293528  | 1.555246  | -0.606123 | C | -2.224895 | 4.466938  | 1.606631  |
| H            | 4.857521  | -1.324403 | -3.465772 | H | -2.064576 | 2.561230  | 2.582147  |
| H            | 6.744013  | -0.098436 | -2.406598 | C | -2.304706 | 4.432238  | -0.807509 |

|    |           |           |           |             |           |           |           |
|----|-----------|-----------|-----------|-------------|-----------|-----------|-----------|
| H  | -2.197601 | 2.498330  | -1.731510 | C           | 2.070548  | -2.879261 | -0.400097 |
| C  | -2.320011 | 5.148180  | 0.392608  | O           | 3.230486  | -2.792156 | -0.785629 |
| H  | -2.237333 | 5.016632  | 2.543273  | C           | 1.529297  | -2.192792 | 0.828582  |
| H  | -2.380445 | 4.953711  | -1.757499 | C           | 2.475016  | -1.544369 | 1.789502  |
| H  | -2.409077 | 6.230733  | 0.380566  | C           | 3.792508  | -1.160858 | 1.452004  |
| C  | -2.423838 | -0.065966 | 2.073611  | C           | 2.037544  | -1.232996 | 3.100749  |
| C  | -1.438316 | 0.046419  | 3.074849  | C           | 4.606764  | -0.494826 | 2.366926  |
| C  | -3.627981 | -0.721006 | 2.367555  | H           | 4.177497  | -1.396908 | 0.473392  |
| C  | -1.659924 | -0.487322 | 4.344190  | C           | 2.856344  | -0.569936 | 4.011501  |
| H  | -0.497721 | 0.550228  | 2.863560  | H           | 1.036125  | -1.488078 | 3.423507  |
| C  | -3.841991 | -1.257015 | 3.639610  | C           | 4.150302  | -0.188325 | 3.649118  |
| H  | -4.391594 | -0.824511 | 1.603567  | H           | 5.611604  | -0.214090 | 2.064396  |
| C  | -2.859911 | -1.146462 | 4.627036  | H           | 2.479660  | -0.352506 | 5.007516  |
| H  | -0.894952 | -0.390779 | 5.109724  | H           | 4.791969  | 0.328846  | 4.356567  |
| H  | -4.778044 | -1.762961 | 3.858107  | C           | 1.645032  | -4.253500 | -2.388440 |
| H  | -3.029660 | -1.568670 | 5.613113  | H           | 1.281081  | -5.281283 | -2.469626 |
| P  | -2.003393 | 0.519226  | 0.382165  | H           | 1.310187  | -3.682286 | -3.264169 |
| Pd | 0.046117  | -0.758127 | 0.183129  | H           | 2.732045  | -4.251163 | -2.361556 |
| C  | -2.501257 | -4.310030 | -1.398251 | C           | 0.432303  | -3.051511 | 1.469124  |
| C  | -1.162060 | -4.179663 | -1.774785 | H           | -0.019516 | -2.581666 | 2.345180  |
| C  | -0.213793 | -3.715248 | -0.849015 | H           | 0.882396  | -3.993354 | 1.830524  |
| C  | -0.642319 | -3.357325 | 0.451030  |             |           |           |           |
| C  | -1.995056 | -3.463712 | 0.794434  | <b>TS4C</b> |           |           |           |
| C  | -2.929884 | -3.945233 | -0.121203 | C           | 3.718650  | 1.692763  | 3.537727  |
| H  | -3.215950 | -4.691551 | -2.121880 | C           | 3.169042  | 1.690715  | 2.255707  |
| H  | -0.863359 | -4.464436 | -2.776068 | C           | 2.349831  | 0.628872  | 1.834066  |
| H  | -2.301794 | -3.184270 | 1.798424  | C           | 2.092719  | -0.428392 | 2.721013  |
| H  | -3.975360 | -4.031184 | 0.155731  | C           | 2.646974  | -0.423612 | 4.002553  |
| N  | 1.157610  | -3.651709 | -1.147731 | C           | 3.458290  | 0.635365  | 4.413415  |

|    |           |           |           |   |           |           |           |
|----|-----------|-----------|-----------|---|-----------|-----------|-----------|
| H  | 4.349583  | 2.519882  | 3.852010  | C | -2.396491 | 3.077178  | 1.394403  |
| H  | 3.367787  | 2.522502  | 1.586570  | C | -2.461158 | 2.875824  | 0.017553  |
| H  | 1.476650  | -1.262531 | 2.399521  | C | -2.140340 | 1.615056  | -0.494990 |
| H  | 2.444275  | -1.251050 | 4.676853  | C | -1.716390 | 0.569946  | 0.343691  |
| H  | 3.887168  | 0.638295  | 5.411929  | C | -1.748412 | 0.769036  | 1.733200  |
| C  | 1.256973  | 2.292736  | -0.302093 | C | -2.052643 | 2.026397  | 2.254601  |
| C  | 1.276018  | 2.673962  | -1.654425 | H | -2.640530 | 4.053920  | 1.802652  |
| C  | 0.866778  | 3.237369  | 0.657321  | H | -2.782754 | 3.673577  | -0.643574 |
| C  | 0.926957  | 3.970591  | -2.032518 | H | -1.500554 | -0.047560 | 2.405428  |
| H  | 1.578123  | 1.961430  | -2.415755 | H | -2.024262 | 2.187464  | 3.328606  |
| C  | 0.528629  | 4.537367  | 0.277778  | N | -2.378321 | 1.235066  | -1.821361 |
| H  | 0.814743  | 2.959789  | 1.704282  | C | -2.624245 | -0.108383 | -2.011407 |
| C  | 0.556533  | 4.909927  | -1.065887 | O | -2.820017 | -0.623948 | -3.100428 |
| H  | 0.959388  | 4.249968  | -3.082543 | C | -2.628656 | -0.901926 | -0.698227 |
| H  | 0.231592  | 5.255126  | 1.037729  | C | -1.861121 | -2.116217 | -0.745597 |
| H  | 0.293556  | 5.922595  | -1.359515 | H | -1.510758 | -2.431360 | -1.725888 |
| C  | 3.010731  | 0.118864  | -0.982293 | H | -2.134360 | -2.934973 | -0.087363 |
| C  | 2.695854  | -0.471562 | -2.216492 | C | -3.913382 | -0.892767 | 0.086383  |
| C  | 4.351088  | 0.391732  | -0.678267 | C | -5.046595 | -0.237059 | -0.411417 |
| C  | 3.700856  | -0.758538 | -3.140026 | C | -4.002945 | -1.561381 | 1.317189  |
| H  | 1.666586  | -0.735572 | -2.441791 | C | -6.245731 | -0.254198 | 0.304315  |
| C  | 5.356467  | 0.089552  | -1.598127 | H | -5.004661 | 0.274176  | -1.368066 |
| H  | 4.619115  | 0.823361  | 0.280255  | C | -5.197464 | -1.573221 | 2.031061  |
| C  | 5.033850  | -0.479516 | -2.831778 | H | -3.127466 | -2.058998 | 1.724294  |
| H  | 3.442604  | -1.221734 | -4.088156 | C | -6.326120 | -0.918565 | 1.527341  |
| H  | 6.393483  | 0.295648  | -1.346859 | H | -7.117258 | 0.252415  | -0.101154 |
| H  | 5.819142  | -0.716298 | -3.544586 | H | -5.247785 | -2.092870 | 2.984013  |
| P  | 1.620387  | 0.538156  | 0.151407  | H | -7.258628 | -0.929421 | 2.084626  |
| Pd | -0.225914 | -0.950742 | -0.104975 | C | -2.447593 | 2.181206  | -2.922029 |

|              |           |           |           |    |           |           |           |
|--------------|-----------|-----------|-----------|----|-----------|-----------|-----------|
| H            | -3.369311 | 2.774913  | -2.876755 | C  | 1.781241  | 0.440988  | 2.855151  |
| H            | -1.583923 | 2.851227  | -2.880354 | C  | 2.743943  | 2.275210  | 1.601503  |
| H            | -2.438384 | 1.609601  | -3.850811 | C  | 1.920043  | 1.171527  | 4.035367  |
| I            | 1.256033  | -3.213025 | -0.092403 | H  | 1.341261  | -0.553386 | 2.880803  |
|              |           |           |           | C  | 2.876055  | 3.005600  | 2.784267  |
| <b>INT4C</b> |           |           |           | H  | 3.043588  | 2.721100  | 0.659819  |
| C            | 3.965308  | 2.247824  | -2.629117 | C  | 2.465234  | 2.457820  | 4.001235  |
| C            | 3.661042  | 1.474926  | -1.511004 | H  | 1.594423  | 0.739345  | 4.977412  |
| C            | 2.357032  | 0.979377  | -1.329936 | H  | 3.297055  | 4.006970  | 2.751777  |
| C            | 1.376372  | 1.227851  | -2.298291 | H  | 2.565094  | 3.031489  | 4.918518  |
| C            | 1.690881  | 2.001660  | -3.418380 | P  | 1.940011  | -0.042438 | 0.129855  |
| C            | 2.976299  | 2.516911  | -3.581701 | Pd | 0.057131  | -1.341176 | 0.065094  |
| H            | 4.972864  | 2.632190  | -2.763117 | C  | -5.905625 | 1.220655  | 1.641241  |
| H            | 4.435607  | 1.245681  | -0.783744 | C  | -5.598317 | 0.451937  | 0.508829  |
| H            | 0.378147  | 0.816887  | -2.188466 | C  | -4.288622 | 0.486734  | 0.045317  |
| H            | 0.922498  | 2.197638  | -4.160378 | C  | -3.299886 | 1.252393  | 0.683914  |
| H            | 3.215428  | 3.118419  | -4.454778 | C  | -3.614082 | 2.012012  | 1.798126  |
| C            | 3.310333  | -1.271483 | 0.170365  | C  | -4.933776 | 1.996971  | 2.276572  |
| C            | 4.279580  | -1.318963 | 1.181512  | H  | -6.922131 | 1.212055  | 2.024755  |
| C            | 3.345200  | -2.224727 | -0.863806 | H  | -6.356729 | -0.145819 | 0.013562  |
| C            | 5.269014  | -2.304678 | 1.156147  | H  | -2.851241 | 2.616700  | 2.281237  |
| H            | 4.266535  | -0.590552 | 1.986020  | H  | -5.199446 | 2.591933  | 3.145435  |
| C            | 4.333024  | -3.207633 | -0.882193 | N  | -3.743336 | -0.153327 | -1.076449 |
| H            | 2.602312  | -2.194808 | -1.658374 | C  | -2.420853 | 0.182336  | -1.254165 |
| C            | 5.296610  | -3.249923 | 0.129313  | O  | -1.734606 | -0.119170 | -2.218682 |
| H            | 6.018993  | -2.331742 | 1.942094  | C  | -1.966101 | 0.995381  | -0.010460 |
| H            | 4.346797  | -3.941662 | -1.682777 | C  | -1.197513 | 0.034251  | 0.932401  |
| H            | 6.065027  | -4.017858 | 0.116805  | H  | -0.636831 | 0.579721  | 1.690824  |
| C            | 2.196024  | 0.985801  | 1.627394  | H  | -1.901039 | -0.637408 | 1.424066  |

|             |           |           |           |    |           |           |           |
|-------------|-----------|-----------|-----------|----|-----------|-----------|-----------|
| C           | -1.241188 | 2.282374  | -0.388070 | C  | 1.409130  | 1.194859  | 1.705386  |
| C           | -1.483556 | 2.898494  | -1.625921 | C  | 2.749377  | 1.597353  | 1.764792  |
| C           | -0.386295 | 2.929528  | 0.512690  | C  | 0.411692  | 2.055041  | 2.192767  |
| C           | -0.864152 | 4.100277  | -1.963902 | C  | 3.082973  | 2.848326  | 2.290734  |
| H           | -2.138152 | 2.421015  | -2.346880 | H  | 3.529150  | 0.944060  | 1.387503  |
| C           | 0.236749  | 4.133337  | 0.175522  | C  | 0.746804  | 3.301031  | 2.716196  |
| H           | -0.185275 | 2.499857  | 1.487080  | H  | -0.630796 | 1.752330  | 2.139295  |
| C           | 0.007077  | 4.721709  | -1.066756 | C  | 2.085313  | 3.703708  | 2.760609  |
| H           | -1.058478 | 4.548008  | -2.934933 | H  | 4.125082  | 3.154758  | 2.326688  |
| H           | 0.907070  | 4.601216  | 0.891098  | H  | -0.035296 | 3.964578  | 3.073500  |
| H           | 0.497591  | 5.653826  | -1.333444 | H  | 2.346547  | 4.680862  | 3.157169  |
| C           | -4.463726 | -1.056687 | -1.950761 | C  | 2.429256  | -1.195479 | 0.430101  |
| H           | -4.776637 | -1.945762 | -1.393278 | C  | 2.935093  | -0.886309 | -0.841798 |
| H           | -5.342125 | -0.559513 | -2.378547 | C  | 3.138226  | -2.070082 | 1.264210  |
| H           | -3.782900 | -1.357082 | -2.747707 | C  | 4.144508  | -1.433897 | -1.266087 |
| I           | -1.651085 | -3.390564 | -0.039185 | H  | 2.385069  | -0.224142 | -1.502078 |
|             |           |           |           | C  | 4.342836  | -2.625792 | 0.829220  |
| <b>TS4D</b> |           |           |           | H  | 2.749211  | -2.324167 | 2.245348  |
| C           | 0.243427  | -1.840543 | 4.746256  | C  | 4.848769  | -2.306638 | -0.432978 |
| C           | 0.734224  | -1.111577 | 3.663104  | H  | 4.526197  | -1.186445 | -2.252641 |
| C           | 0.220689  | -1.326086 | 2.372197  | H  | 4.883664  | -3.310927 | 1.476504  |
| C           | -0.796512 | -2.275201 | 2.187305  | H  | 5.785542  | -2.743234 | -0.768893 |
| C           | -1.285429 | -2.999622 | 3.276027  | P  | 0.868637  | -0.382418 | 0.932705  |
| C           | -0.768282 | -2.785241 | 4.554740  | Pd | -0.776291 | -0.134009 | -0.812410 |
| H           | 0.649355  | -1.667834 | 5.739473  | C  | -5.276550 | 0.095108  | 0.577833  |
| H           | 1.512801  | -0.371397 | 3.822005  | C  | -4.453837 | 1.205841  | 0.772095  |
| H           | -1.196511 | -2.457275 | 1.195835  | C  | -3.211452 | 1.320997  | 0.120773  |
| H           | -2.073297 | -3.731103 | 3.119231  | C  | -2.805383 | 0.227420  | -0.679165 |
| H           | -1.152603 | -3.349395 | 5.400401  | C  | -3.663969 | -0.838147 | -0.945938 |

|   |           |           |           |              |           |           |           |
|---|-----------|-----------|-----------|--------------|-----------|-----------|-----------|
| C | -4.896776 | -0.921708 | -0.293117 | <b>INT4D</b> |           |           |           |
| H | -6.229944 | 0.049415  | 1.096320  | C            | -4.470175 | 0.782318  | 3.199929  |
| H | -4.808461 | 2.000019  | 1.415733  | C            | -3.969536 | 0.699137  | 1.901291  |
| H | -3.346685 | -1.622037 | -1.622067 | C            | -2.590339 | 0.535331  | 1.678214  |
| H | -5.540372 | -1.778776 | -0.467970 | C            | -1.726794 | 0.439811  | 2.780204  |
| N | -2.449169 | 2.512456  | 0.259807  | C            | -2.233723 | 0.521137  | 4.079153  |
| C | -1.305779 | 2.874470  | -0.471021 | C            | -3.601814 | 0.695241  | 4.291670  |
| O | -0.786432 | 3.971062  | -0.294013 | H            | -5.537654 | 0.909708  | 3.358763  |
| C | -0.737548 | 1.897932  | -1.466467 | H            | -4.654753 | 0.742621  | 1.059686  |
| C | 0.661235  | 2.088985  | -1.952302 | H            | -0.661105 | 0.309878  | 2.625151  |
| C | 1.631913  | 2.763135  | -1.179902 | H            | -1.553439 | 0.445666  | 4.922721  |
| C | 1.082199  | 1.516595  | -3.172784 | H            | -3.993134 | 0.757053  | 5.303641  |
| C | 2.955012  | 2.839982  | -1.604803 | C            | -3.160188 | -0.527162 | -0.948863 |
| H | 1.351119  | 3.223095  | -0.245080 | C            | -3.394582 | -0.267614 | -2.308326 |
| C | 2.407507  | 1.602368  | -3.595550 | C            | -3.802876 | -1.620384 | -0.346798 |
| H | 0.381212  | 0.980835  | -3.801428 | C            | -4.255541 | -1.080864 | -3.046006 |
| C | 3.355484  | 2.261229  | -2.811103 | H            | -2.910702 | 0.576531  | -2.790579 |
| H | 3.678160  | 3.352700  | -0.977006 | C            | -4.676396 | -2.422186 | -1.083013 |
| H | 2.695367  | 1.145487  | -4.538208 | H            | -3.620285 | -1.846517 | 0.698916  |
| H | 4.390524  | 2.323438  | -3.135455 | C            | -4.901812 | -2.159568 | -2.435442 |
| C | -2.911719 | 3.504121  | 1.234262  | H            | -4.430919 | -0.863578 | -4.096323 |
| H | -3.872583 | 3.936881  | 0.934185  | H            | -5.174220 | -3.258112 | -0.598570 |
| H | -3.019290 | 3.037804  | 2.219073  | H            | -5.578623 | -2.786780 | -3.009192 |
| H | -2.168905 | 4.295818  | 1.281514  | C            | -2.013531 | 2.117822  | -0.748103 |
| C | -1.724305 | 1.201873  | -2.273221 | C            | -1.132465 | 2.440774  | -1.792017 |
| H | -1.425874 | 0.670177  | -3.171399 | C            | -2.956230 | 3.066983  | -0.330474 |
| H | -2.715003 | 1.629944  | -2.374354 | C            | -1.211281 | 3.681273  | -2.424946 |
| I | -0.591069 | -2.768581 | -1.737617 | H            | -0.364860 | 1.731073  | -2.086795 |
|   |           |           |           | C            | -3.023020 | 4.312912  | -0.955617 |

|    |           |           |           |               |           |           |           |
|----|-----------|-----------|-----------|---------------|-----------|-----------|-----------|
| H  | -3.627091 | 2.847754  | 0.493180  | H             | -1.062549 | -5.006877 | 1.257073  |
| C  | -2.156603 | 4.620104  | -2.006855 | H             | -1.871440 | -3.010155 | -2.463331 |
| H  | -0.518996 | 3.920703  | -3.227261 | H             | -2.533671 | -4.642189 | -0.719937 |
| H  | -3.750568 | 5.045478  | -0.616574 | C             | 4.745765  | -0.914943 | 2.219657  |
| H  | -2.209651 | 5.592180  | -2.489681 | H             | 5.821052  | -0.990201 | 2.036275  |
| P  | -1.891734 | 0.434081  | -0.018264 | H             | 4.519244  | 0.048046  | 2.693575  |
| Pd | 0.273822  | -0.508264 | -0.114289 | H             | 4.425765  | -1.714706 | 2.883184  |
| C  | 5.704937  | 1.580506  | -1.084092 | C             | 2.865314  | -1.603948 | -1.518547 |
| C  | 5.362096  | 0.784774  | 0.009526  | H             | 2.256762  | -1.480182 | -2.416707 |
| C  | 4.416133  | -0.239639 | -0.135313 | H             | 3.432518  | -2.541999 | -1.663175 |
| C  | 3.831359  | -0.463811 | -1.391597 | I             | 1.488684  | 1.696136  | 0.845232  |
| C  | 4.178440  | 0.344684  | -2.470617 |               |           |           |           |
| C  | 5.114119  | 1.370927  | -2.329270 | <b>(E)-2a</b> |           |           |           |
| H  | 6.431569  | 2.377302  | -0.950767 | C             | -0.657982 | 1.550762  | 0.179814  |
| H  | 5.808996  | 0.994149  | 0.973148  | C             | 0.586026  | 1.151497  | -0.144937 |
| H  | 3.708702  | 0.162753  | -3.435078 | H             | 1.251736  | 1.864821  | -0.616479 |
| H  | 5.375459  | 1.996256  | -3.177893 | C             | 1.093513  | -0.223630 | 0.081001  |
| N  | 4.025502  | -1.051186 | 0.955618  | O             | 0.343057  | -1.175175 | 0.297832  |
| C  | 2.802709  | -1.720348 | 1.010464  | C             | 2.576401  | -0.442225 | 0.008185  |
| O  | 2.414183  | -2.212543 | 2.071593  | C             | 3.034788  | -1.763744 | -0.118991 |
| C  | 2.017224  | -1.787178 | -0.264549 | C             | 3.514295  | 0.598660  | 0.093793  |
| C  | 0.847002  | -2.667551 | -0.355340 | C             | 4.397600  | -2.036829 | -0.178130 |
| C  | 0.410169  | -3.591285 | 0.646748  | H             | 2.299627  | -2.560128 | -0.169516 |
| C  | -0.024412 | -2.469943 | -1.482900 | C             | 4.880748  | 0.323005  | 0.045510  |
| C  | -0.770800 | -4.289686 | 0.494237  | H             | 3.187200  | 1.625226  | 0.225092  |
| H  | 1.034243  | -3.732183 | 1.517012  | C             | 5.324570  | -0.992855 | -0.096936 |
| C  | -1.232712 | -3.187375 | -1.603690 | H             | 4.740630  | -3.062226 | -0.285567 |
| H  | 0.303513  | -1.890525 | -2.339559 | H             | 5.597925  | 1.135605  | 0.121361  |
| C  | -1.603136 | -4.090379 | -0.626891 | H             | 6.389425  | -1.205415 | -0.141063 |

|                                 |           |           |           |             |           |           |           |
|---------------------------------|-----------|-----------|-----------|-------------|-----------|-----------|-----------|
| Cl                              | -1.116604 | 3.208091  | -0.234537 | O           | -1.125771 | -1.827196 | 0.000189  |
| C                               | -1.756845 | 0.753833  | 0.815744  | O           | 1.125773  | -1.827193 | 0.000160  |
| C                               | -2.652485 | 0.076329  | -0.242034 | Cs          | 2.831928  | 0.321134  | -0.000093 |
| H                               | -2.360377 | 1.412271  | 1.450379  | Cs          | -2.831928 | 0.321134  | 0.000066  |
| H                               | -1.305932 | -0.020866 | 1.440860  |             |           |           |           |
| C                               | -3.773035 | -0.748774 | 0.397768  | <b>TS-A</b> |           |           |           |
| H                               | -3.080832 | 0.841867  | -0.902779 | C           | -0.841779 | 1.953373  | -1.044274 |
| H                               | -2.018959 | -0.572128 | -0.857678 | C           | 0.401059  | 1.526419  | -1.481235 |
| C                               | -4.674122 | -1.436235 | -0.634825 | H           | 1.199360  | 2.257072  | -1.447549 |
| H                               | -3.329261 | -1.509024 | 1.056743  | C           | 0.756361  | 0.177385  | -1.806982 |
| H                               | -4.386235 | -0.101108 | 1.042367  | O           | -0.024732 | -0.796960 | -1.893226 |
| H                               | -5.117748 | -0.675283 | -1.292582 | C           | 2.243286  | -0.102046 | -1.925580 |
| H                               | -4.057584 | -2.077080 | -1.280520 | C           | 2.695348  | -1.380695 | -1.557266 |
| C                               | -5.785866 | -2.271643 | 0.007722  | C           | 3.199092  | 0.855227  | -2.309395 |
| H                               | -6.415453 | -2.752899 | -0.749388 | C           | 4.056510  | -1.682553 | -1.525182 |
| H                               | -5.367119 | -3.060068 | 0.645317  | H           | 1.953991  | -2.122607 | -1.281767 |
| H                               | -6.434867 | -1.648605 | 0.635828  | C           | 4.561749  | 0.550789  | -2.294424 |
|                                 |           |           |           | H           | 2.877153  | 1.838005  | -2.640302 |
| K <sub>2</sub> CO <sub>3</sub>  |           |           |           | C           | 4.998133  | -0.714420 | -1.888896 |
| C                               | -0.000118 | 0.809588  | 0.000063  | H           | 4.384507  | -2.674553 | -1.223503 |
| O                               | -0.000001 | -0.539503 | -0.000094 | H           | 5.283939  | 1.300053  | -2.609127 |
| O                               | 1.126696  | 1.428044  | 0.000043  | H           | 6.059370  | -0.948768 | -1.874672 |
| O                               | -1.127154 | 1.427669  | 0.000261  | Cl          | -0.897368 | 3.656315  | -0.564273 |
| K                               | 2.524389  | -0.615400 | 0.000061  | C           | -2.043741 | 1.182110  | -0.868663 |
| K                               | -2.524158 | -0.615506 | -0.000170 | C           | -3.412723 | 1.855178  | -0.775479 |
|                                 |           |           |           | H           | -1.909034 | 0.628122  | 0.212473  |
| Cs <sub>2</sub> CO <sub>3</sub> |           |           |           | H           | -2.030703 | 0.350954  | -1.580474 |
| C                               | 0.000000  | -1.199420 | 0.000001  | C           | -4.500624 | 0.811099  | -0.489927 |
| O                               | -0.000002 | 0.138357  | -0.000166 | H           | -3.404976 | 2.589114  | 0.038035  |



|               |           |           |           |    |           |           |           |
|---------------|-----------|-----------|-----------|----|-----------|-----------|-----------|
| H             | -3.652721 | 2.405663  | -1.697988 | H  | 3.061129  | 2.430606  | -1.320558 |
| C             | -5.902871 | 1.411956  | -0.348897 | C  | 5.470753  | 0.070873  | -0.867270 |
| H             | -4.510437 | 0.062681  | -1.299961 | H  | 5.112512  | -2.055691 | -0.762010 |
| H             | -4.231180 | 0.277393  | 0.431477  | H  | 5.505347  | 2.220747  | -1.054438 |
| H             | -5.894083 | 2.156211  | 0.459644  | H  | 6.547299  | -0.019409 | -0.749704 |
| H             | -6.161547 | 1.959540  | -1.266926 | Cl | -1.162441 | 3.095500  | 0.629927  |
| C             | -6.975690 | 0.356305  | -0.060435 | C  | -1.862003 | 0.728169  | -0.549840 |
| H             | -7.970782 | 0.805074  | 0.043329  | C  | -3.321422 | 1.162942  | -0.442370 |
| H             | -7.026383 | -0.384367 | -0.869430 | H  | -1.732200 | -0.162027 | 0.342603  |
| H             | -6.752705 | -0.183053 | 0.868976  | H  | -1.646785 | 0.153783  | -1.456019 |
| C             | -0.545423 | 0.012932  | 1.759280  | C  | -4.263678 | -0.029001 | -0.655702 |
| O             | 0.248380  | -1.002227 | 1.911685  | H  | -3.504817 | 1.586790  | 0.551477  |
| O             | -0.163531 | 1.222212  | 1.869817  | H  | -3.552879 | 1.956157  | -1.169818 |
| O             | -1.803930 | -0.234890 | 1.389191  | C  | -5.746130 | 0.342150  | -0.542901 |
| Cs            | 2.613958  | 0.752721  | 1.730108  | H  | -4.077403 | -0.469893 | -1.648805 |
| Cs            | -1.361961 | -2.695582 | 0.066525  | H  | -4.019075 | -0.804082 | 0.083221  |
|               |           |           |           | H  | -5.930839 | 0.784090  | 0.446291  |
| <b>TS-A-K</b> |           |           |           | H  | -5.983852 | 1.125456  | -1.277275 |
| C             | -0.787798 | 1.637482  | -0.302518 | C  | -6.678015 | -0.856482 | -0.749326 |
| C             | 0.558927  | 1.502222  | -0.621039 | H  | -7.732600 | -0.570761 | -0.657569 |
| H             | 1.218475  | 2.280996  | -0.259189 | H  | -6.537462 | -1.298725 | -1.744297 |
| C             | 1.161188  | 0.360946  | -1.232429 | H  | -6.477353 | -1.640096 | -0.007839 |
| O             | 0.560635  | -0.638878 | -1.696915 | C  | -0.414981 | -1.056762 | 1.749145  |
| C             | 2.675973  | 0.308595  | -1.175012 | O  | 0.539111  | -1.933124 | 1.619888  |
| C             | 3.283740  | -0.952097 | -1.040791 | O  | -0.272372 | 0.038489  | 2.371777  |
| C             | 3.500466  | 1.447774  | -1.178807 | K  | -0.470495 | -2.828379 | -0.627663 |
| C             | 4.664269  | -1.071569 | -0.875181 | K  | 2.260012  | -0.074425 | 2.253541  |
| H             | 2.649474  | -1.831515 | -1.052166 | O  | -1.563484 | -1.304509 | 1.109396  |
| C             | 4.883808  | 1.329344  | -1.032213 |    |           |           |           |

|    |           |           |           |             |           |           |           |
|----|-----------|-----------|-----------|-------------|-----------|-----------|-----------|
| A  |           |           |           | C           | -6.241746 | -0.615979 | 1.458141  |
| C  | -0.821403 | 0.518770  | -0.493997 | H           | -7.324507 | -0.621583 | 1.275307  |
| C  | 0.583278  | 0.607218  | -0.246836 | H           | -5.998258 | -1.505344 | 2.053866  |
| H  | 1.000693  | 1.599081  | -0.140094 | H           | -6.010157 | 0.262481  | 2.073824  |
| C  | 1.428166  | -0.516045 | -0.204713 |             |           |           |           |
| O  | 1.094277  | -1.722895 | -0.390370 | <b>TS-B</b> |           |           |           |
| C  | 2.905113  | -0.256795 | 0.063802  | C           | 0.801487  | 0.744651  | 0.944280  |
| C  | 3.809766  | -1.282175 | -0.260252 | C           | -0.547333 | 0.754870  | 0.720764  |
| C  | 3.428534  | 0.913084  | 0.641058  | H           | -1.068727 | 1.705507  | 0.716729  |
| C  | 5.179606  | -1.136837 | -0.048039 | C           | -1.271903 | -0.452666 | 0.431071  |
| H  | 3.389130  | -2.193209 | -0.674655 | O           | -0.823856 | -1.611711 | 0.507127  |
| C  | 4.798741  | 1.061275  | 0.861525  | C           | -2.740541 | -0.295121 | 0.056796  |
| H  | 2.753085  | 1.707681  | 0.944079  | C           | -3.583630 | -1.401908 | 0.237093  |
| C  | 5.686402  | 0.039046  | 0.513200  | C           | -3.285391 | 0.871555  | -0.500079 |
| H  | 5.858023  | -1.945498 | -0.317553 | C           | -4.934668 | -1.339482 | -0.098453 |
| H  | 5.174842  | 1.976622  | 1.316421  | H           | -3.139063 | -2.307549 | 0.638443  |
| H  | 6.754999  | 0.154063  | 0.686148  | C           | -4.636500 | 0.934957  | -0.847651 |
| Cl | -1.633423 | 2.172852  | -0.491358 | H           | -2.642213 | 1.726023  | -0.687444 |
| C  | -1.620491 | -0.550352 | -0.720238 | C           | -5.469322 | -0.167241 | -0.641699 |
| C  | -3.107137 | -0.550124 | -0.934312 | H           | -5.573921 | -2.206674 | 0.058199  |
| H  | -1.083360 | -1.494857 | -0.692478 | H           | -5.037863 | 1.846064  | -1.287243 |
| C  | -3.921668 | -0.580191 | 0.376537  | H           | -6.522858 | -0.116322 | -0.909759 |
| H  | -3.419080 | 0.333852  | -1.508398 | Cl          | 1.747030  | 2.383012  | -0.414708 |
| H  | -3.389572 | -1.427374 | -1.537619 | C           | 1.776716  | 0.115571  | 1.582395  |
| C  | -5.438480 | -0.594032 | 0.153009  | C           | 3.240742  | 0.055461  | 1.233959  |
| H  | -3.627238 | -1.461331 | 0.965289  | H           | 1.431878  | -0.466532 | 2.439213  |
| H  | -3.643583 | 0.297549  | 0.974742  | C           | 3.520077  | -0.752007 | -0.046035 |
| H  | -5.723483 | 0.289320  | -0.437381 | H           | 3.610875  | 1.076974  | 1.086187  |
| H  | -5.709638 | -1.467953 | -0.458749 | H           | 3.799533  | -0.384314 | 2.073798  |

|          |           |           |           |              |           |           |           |
|----------|-----------|-----------|-----------|--------------|-----------|-----------|-----------|
| C        | 5.007947  | -0.803983 | -0.409012 | C            | 2.158802  | -1.400527 | -0.371338 |
| H        | 3.126720  | -1.772413 | 0.069439  | C            | 1.985885  | 0.049493  | -0.027716 |
| H        | 2.955099  | -0.284971 | -0.860926 | C            | 2.520566  | 0.990761  | -0.921269 |
| H        | 5.382740  | 0.222890  | -0.527198 | C            | 1.356586  | 0.498449  | 1.142629  |
| H        | 5.578319  | -1.244788 | 0.423777  | C            | 2.396151  | 2.354137  | -0.669343 |
| C        | 5.281506  | -1.597750 | -1.691210 | H            | 3.028014  | 0.628916  | -1.809741 |
| H        | 6.350549  | -1.618823 | -1.941569 | C            | 1.245131  | 1.864875  | 1.401043  |
| H        | 4.939833  | -2.636238 | -1.590927 | H            | 0.974505  | -0.217333 | 1.860601  |
| H        | 4.745311  | -1.157795 | -2.541028 | C            | 1.754738  | 2.794344  | 0.492280  |
|          |           |           |           | H            | 2.801913  | 3.074848  | -1.374143 |
| <b>6</b> |           |           |           | H            | 0.764403  | 2.203139  | 2.314982  |
| C        | -0.048580 | -2.175998 | 0.521611  | H            | 1.660010  | 3.858499  | 0.692004  |
| C        | -1.254123 | -1.900830 | 0.939657  | O            | 3.100026  | -1.766173 | -1.066018 |
| H        | -1.434341 | -1.835926 | 2.014729  |              |           |           |           |
| C        | 1.160573  | -2.422772 | 0.065025  | <b>INT5A</b> |           |           |           |
| H        | 1.476831  | -3.444937 | -0.140058 | C            | 0.135310  | 2.654014  | 4.201174  |
| C        | -2.415775 | -1.557174 | 0.032816  | C            | 0.022181  | 2.806582  | 2.817741  |
| C        | -2.805241 | -0.073162 | 0.163901  | C            | 0.674091  | 1.917009  | 1.955989  |
| H        | -3.279262 | -2.186676 | 0.290538  | C            | 1.426931  | 0.858693  | 2.499029  |
| H        | -2.152496 | -1.781819 | -1.007107 | C            | 1.536017  | 0.712273  | 3.881795  |
| C        | -3.979831 | 0.318347  | -0.739741 | C            | 0.892094  | 1.611359  | 4.737169  |
| H        | -3.060321 | 0.144878  | 1.211484  | H            | -0.380096 | 3.347393  | 4.859756  |
| H        | -1.928924 | 0.545440  | -0.072862 | H            | -0.599237 | 3.597281  | 2.414986  |
| C        | -4.360265 | 1.796283  | -0.606159 | H            | 1.909018  | 0.144779  | 1.835735  |
| H        | -3.720742 | 0.097229  | -1.784684 | H            | 2.118137  | -0.109217 | 4.292330  |
| H        | -4.849064 | -0.310566 | -0.500020 | H            | 0.973782  | 1.494480  | 5.814224  |
| H        | -5.197829 | 2.055763  | -1.263388 | C            | -0.329883 | 3.559862  | -0.293717 |
| H        | -4.655455 | 2.035785  | 0.422936  | C            | 0.163378  | 4.792151  | 0.166676  |
| H        | -3.515146 | 2.444776  | -0.867495 | C            | -1.461599 | 3.543259  | -1.117763 |

|    |           |           |           |    |           |           |           |
|----|-----------|-----------|-----------|----|-----------|-----------|-----------|
| C  | -0.483839 | 5.980313  | -0.170260 | H  | -4.149960 | -2.030221 | -2.183186 |
| H  | 1.053745  | 4.824327  | 0.788442  | H  | -6.341556 | -1.616984 | -3.287886 |
| C  | -2.102510 | 4.734207  | -1.463034 | N  | -4.287930 | 1.738819  | 0.169020  |
| H  | -1.842769 | 2.601295  | -1.487445 | C  | -3.086929 | 1.169322  | 0.527495  |
| C  | -1.619830 | 5.953248  | -0.984285 | O  | -2.281229 | 1.680075  | 1.292495  |
| H  | -0.097992 | 6.927206  | 0.196665  | C  | -2.940454 | -0.182900 | -0.224359 |
| H  | -2.977282 | 4.706533  | -2.107016 | C  | -1.785505 | -0.088428 | -1.268575 |
| H  | -2.119825 | 6.880357  | -1.250052 | H  | -1.800929 | -1.021012 | -1.850116 |
| C  | 2.265947  | 2.405398  | -0.416657 | H  | -2.018413 | 0.722363  | -1.967406 |
| C  | 2.570646  | 2.292445  | -1.784826 | C  | -2.736305 | -1.310605 | 0.801334  |
| C  | 3.267890  | 2.832367  | 0.466614  | C  | -1.703698 | -1.210383 | 1.753755  |
| C  | 3.844271  | 2.609366  | -2.260096 | C  | -3.569012 | -2.437756 | 0.853636  |
| H  | 1.806847  | 1.946071  | -2.476799 | C  | -1.510893 | -2.201631 | 2.716753  |
| C  | 4.548563  | 3.141797  | -0.007518 | H  | -1.072316 | -0.332142 | 1.766083  |
| H  | 3.052634  | 2.927045  | 1.526389  | C  | -3.376055 | -3.437541 | 1.816941  |
| C  | 4.840205  | 3.035016  | -1.370864 | H  | -4.401030 | -2.529068 | 0.164929  |
| H  | 4.056984  | 2.535754  | -3.323710 | C  | -2.345863 | -3.325350 | 2.755331  |
| H  | 5.309382  | 3.489124  | 0.687291  | H  | -0.721107 | -2.075882 | 3.453533  |
| H  | 5.826758  | 3.302038  | -1.741787 | H  | -4.058297 | -4.284018 | 1.851871  |
| P  | 0.533956  | 1.996302  | 0.123662  | H  | -2.218012 | -4.082515 | 3.525829  |
| Pd | 0.175496  | -0.092155 | -0.689177 | C  | -4.733311 | 3.033418  | 0.645128  |
| C  | -6.689892 | 0.247817  | -2.267456 | H  | -4.867010 | 3.725363  | -0.193780 |
| C  | -6.208284 | 1.191617  | -1.350480 | H  | -5.680743 | 2.938771  | 1.187039  |
| C  | -4.988307 | 0.929801  | -0.737499 | H  | -3.963331 | 3.421401  | 1.312819  |
| C  | -4.250871 | -0.235009 | -0.998459 | O  | 2.511104  | -3.065545 | -0.579320 |
| C  | -4.727429 | -1.143639 | -1.934491 | C  | 1.766218  | -2.065510 | -0.667667 |
| C  | -5.958822 | -0.904613 | -2.563261 | O  | 2.140320  | -0.854674 | -0.292053 |
| H  | -7.641740 | 0.424273  | -2.759907 | Cs | 4.975940  | -0.878020 | -0.635820 |
| H  | -6.766675 | 2.096711  | -1.133354 | O  | 0.527031  | -2.122808 | -1.127082 |

|             |           |           |           |    |           |           |           |
|-------------|-----------|-----------|-----------|----|-----------|-----------|-----------|
| Cs          | -0.243215 | -4.717486 | -0.089553 | H  | 5.194681  | 4.894157  | 0.964356  |
|             |           |           |           | H  | 6.502220  | 3.756650  | 0.543972  |
| <b>TS6A</b> |           |           |           | H  | 5.558145  | 4.547029  | -0.750849 |
| C           | 4.196570  | 1.405399  | 3.558321  | Pd | 0.178544  | 0.421242  | -0.735377 |
| C           | 4.696804  | 2.314846  | 2.616996  | C  | 1.456643  | 2.019627  | -0.757878 |
| C           | 4.206214  | 2.235648  | 1.317496  | H  | 1.196634  | 2.772082  | -0.007635 |
| C           | 3.242488  | 1.286023  | 0.936245  | H  | 1.398252  | 2.470085  | -1.755673 |
| C           | 2.755589  | 0.391007  | 1.879602  | C  | -0.282230 | -2.359070 | 0.118978  |
| C           | 3.239873  | 0.455069  | 3.197099  | O  | -0.773462 | -3.491870 | 0.379203  |
| H           | 4.561067  | 1.446220  | 4.581068  | O  | -0.939319 | -1.459446 | -0.568669 |
| H           | 5.440065  | 3.055652  | 2.894269  | O  | 0.940584  | -2.053222 | 0.526766  |
| H           | 2.015212  | -0.354476 | 1.611589  | C  | -4.202712 | 0.545203  | 2.992111  |
| H           | 2.860430  | -0.239500 | 3.942198  | C  | -3.702927 | 1.133935  | 1.826946  |
| N           | 4.553774  | 3.035266  | 0.221527  | C  | -2.353464 | 0.970270  | 1.467693  |
| C           | 3.865158  | 2.656762  | -0.916412 | C  | -1.510825 | 0.219467  | 2.306004  |
| O           | 3.985236  | 3.169116  | -2.016111 | C  | -2.012442 | -0.366808 | 3.471056  |
| C           | 2.903304  | 1.502522  | -0.533435 | C  | -3.358671 | -0.210528 | 3.814063  |
| C           | 3.073365  | 0.275108  | -1.414275 | H  | -5.245496 | 0.687496  | 3.263996  |
| C           | 4.165867  | 0.066225  | -2.260501 | H  | -4.368882 | 1.712789  | 1.194400  |
| C           | 1.978016  | -0.621859 | -1.432885 | H  | -0.469967 | 0.074533  | 2.031131  |
| C           | 4.175727  | -1.017059 | -3.143951 | H  | -1.349363 | -0.945000 | 4.108513  |
| H           | 4.990601  | 0.771116  | -2.273943 | H  | -3.746432 | -0.662070 | 4.723405  |
| C           | 1.989960  | -1.675158 | -2.369358 | C  | -3.038458 | 1.521275  | -1.302950 |
| H           | 1.396303  | -1.137939 | -0.319643 | C  | -4.091861 | 2.449932  | -1.327179 |
| C           | 3.079704  | -1.883736 | -3.215587 | C  | -3.048084 | 0.450009  | -2.213551 |
| H           | 5.027681  | -1.162504 | -3.802990 | C  | -5.154189 | 2.289310  | -2.218853 |
| H           | 1.122221  | -2.332265 | -2.422271 | H  | -4.072160 | 3.309603  | -0.663097 |
| H           | 3.070774  | -2.692784 | -3.942954 | C  | -4.114653 | 0.292061  | -3.102316 |
| C           | 5.510424  | 4.122067  | 0.253103  | H  | -2.213585 | -0.245418 | -2.233317 |

|              |           |           |           |    |           |           |           |
|--------------|-----------|-----------|-----------|----|-----------|-----------|-----------|
| C            | -5.171887 | 1.206540  | -3.102364 | H  | 3.108926  | -0.130584 | 3.751599  |
| H            | -5.960822 | 3.016859  | -2.232290 | N  | 4.795315  | 2.547717  | -0.428038 |
| H            | -4.103700 | -0.527397 | -3.816889 | C  | 3.754157  | 2.426316  | -1.348357 |
| H            | -5.993460 | 1.090924  | -3.803775 | O  | 3.691197  | 3.013102  | -2.410190 |
| C            | -1.486431 | 3.453182  | 0.186011  | C  | 2.751251  | 1.386542  | -0.792792 |
| C            | -1.086133 | 4.245998  | -0.903578 | C  | 2.832066  | 0.096976  | -1.604487 |
| C            | -1.682615 | 4.049246  | 1.438894  | C  | 3.988704  | -0.383221 | -2.231052 |
| C            | -0.902271 | 5.617297  | -0.742731 | C  | 1.613980  | -0.615149 | -1.668729 |
| H            | -0.913038 | 3.787330  | -1.873701 | C  | 3.941803  | -1.585772 | -2.948456 |
| C            | -1.490665 | 5.424476  | 1.595869  | H  | 4.914853  | 0.186177  | -2.192518 |
| H            | -1.984469 | 3.448374  | 2.291074  | C  | 1.588238  | -1.817994 | -2.395792 |
| C            | -1.104275 | 6.208759  | 0.508332  | H  | 0.808857  | -1.434388 | 0.404382  |
| H            | -0.592689 | 6.222254  | -1.589940 | C  | 2.740040  | -2.301619 | -3.033563 |
| H            | -1.645202 | 5.880139  | 2.569807  | H  | 4.829223  | -1.943237 | -3.465361 |
| H            | -0.955461 | 7.277350  | 0.634097  | H  | 0.657662  | -2.377250 | -2.467402 |
| P            | -1.648740 | 1.654996  | -0.098533 | H  | 2.696344  | -3.220285 | -3.615374 |
| Cs           | -3.654429 | -2.465572 | 0.225130  | C  | 5.920213  | 3.443316  | -0.610434 |
| Cs           | 2.268470  | -4.602158 | 0.286835  | H  | 5.919515  | 4.229751  | 0.153537  |
|              |           |           |           | H  | 6.866825  | 2.893768  | -0.553535 |
| <b>INT6A</b> |           |           |           | H  | 5.820020  | 3.895822  | -1.598434 |
| C            | 4.768300  | 1.009073  | 2.975883  | Pd | 0.017711  | 0.261464  | -0.759720 |
| C            | 5.282931  | 1.751632  | 1.902257  | C  | 1.287170  | 1.870778  | -0.867490 |
| C            | 4.521009  | 1.829614  | 0.738727  | H  | 1.078827  | 2.611451  | -0.089271 |
| C            | 3.284945  | 1.167527  | 0.614228  | H  | 1.126823  | 2.329832  | -1.850339 |
| C            | 2.769512  | 0.474641  | 1.699750  | C  | -0.699356 | -2.558907 | 0.234954  |
| C            | 3.519480  | 0.387606  | 2.888322  | O  | -1.273808 | -3.597115 | 0.565449  |
| H            | 5.338793  | 0.948040  | 3.898628  | O  | -1.136473 | -1.655185 | -0.572692 |
| H            | 6.234887  | 2.266160  | 1.987005  | O  | 0.542537  | -2.298009 | 0.805497  |
| H            | 1.777501  | 0.035230  | 1.637906  | C  | -4.596072 | -0.008183 | 2.920758  |

|   |           |           |           |              |           |           |           |
|---|-----------|-----------|-----------|--------------|-----------|-----------|-----------|
| C | -4.022601 | 0.724796  | 1.877807  | H            | -0.687850 | 6.152520  | -0.644996 |
| C | -2.661779 | 0.568708  | 1.558086  | H            | -1.887982 | 5.231042  | 3.384310  |
| C | -1.887338 | -0.321959 | 2.319679  | H            | -1.109376 | 6.881157  | 1.697046  |
| C | -2.461348 | -1.059457 | 3.358271  | P            | -1.856062 | 1.431317  | 0.132816  |
| C | -3.817789 | -0.908076 | 3.658439  | Cs           | -4.060045 | -2.575099 | -0.224042 |
| H | -5.646578 | 0.130804  | 3.163408  | Cs           | 3.582014  | -2.979828 | 0.702351  |
| H | -4.640275 | 1.412284  | 1.308498  |              |           |           |           |
| H | -0.839214 | -0.463541 | 2.078006  | <b>INT7A</b> |           |           |           |
| H | -1.849490 | -1.756381 | 3.923573  | C            | 1.033152  | 5.495131  | -0.932222 |
| H | -4.264912 | -1.478094 | 4.468405  | C            | 0.736355  | 4.455851  | -0.049093 |
| C | -3.206518 | 1.507569  | -1.124288 | C            | 0.294887  | 3.218434  | -0.538381 |
| C | -4.237473 | 2.459389  | -1.073506 | C            | 0.162576  | 3.038155  | -1.924947 |
| C | -3.201253 | 0.563173  | -2.166524 | C            | 0.449229  | 4.082306  | -2.804668 |
| C | -5.263513 | 2.442011  | -2.020520 | C            | 0.886813  | 5.312471  | -2.309157 |
| H | -4.228176 | 3.226744  | -0.304422 | H            | 1.381398  | 6.448079  | -0.542869 |
| C | -4.230484 | 0.546869  | -3.111912 | H            | 0.858954  | 4.607780  | 1.018574  |
| H | -2.375129 | -0.139032 | -2.248659 | H            | -0.147992 | 2.071940  | -2.313373 |
| C | -5.267375 | 1.481233  | -3.035734 | H            | 0.347536  | 3.927839  | -3.875236 |
| H | -6.053059 | 3.186737  | -1.973170 | H            | 1.122103  | 6.122619  | -2.993975 |
| H | -4.203429 | -0.172042 | -3.927255 | C            | 0.710288  | 2.128984  | 2.145986  |
| H | -6.059804 | 1.478615  | -3.778919 | C            | 0.241895  | 3.052815  | 3.095464  |
| C | -1.678455 | 3.170205  | 0.679294  | C            | 1.895793  | 1.423548  | 2.403294  |
| C | -1.230280 | 4.106825  | -0.268957 | C            | 0.953504  | 3.266454  | 4.276594  |
| C | -1.911050 | 3.584845  | 1.997807  | H            | -0.683259 | 3.592912  | 2.915515  |
| C | -1.032575 | 5.436997  | 0.095922  | C            | 2.607402  | 1.641752  | 3.583704  |
| H | -1.033236 | 3.793838  | -1.290954 | H            | 2.262432  | 0.698822  | 1.685208  |
| C | -1.704005 | 4.918386  | 2.360254  | C            | 2.137329  | 2.563255  | 4.521383  |
| H | -2.256303 | 2.874481  | 2.742516  | H            | 0.582629  | 3.980448  | 5.007163  |
| C | -1.268055 | 5.844966  | 1.412395  | H            | 3.521078  | 1.080936  | 3.760549  |

|   |           |           |           |   |           |           |           |
|---|-----------|-----------|-----------|---|-----------|-----------|-----------|
| H | 2.686790  | 2.731593  | 5.443801  | H | 1.889649  | 0.702893  | -2.289732 |
| C | -1.932163 | 2.053334  | 0.913010  | C | 2.381029  | -1.977219 | -1.847299 |
| C | -2.498379 | 1.501470  | 2.074174  | C | 2.940492  | -3.019078 | -2.590391 |
| C | -2.785129 | 2.598990  | -0.059298 | C | 1.013319  | -1.981826 | -1.495887 |
| C | -3.882718 | 1.473038  | 2.246098  | C | 2.138209  | -4.080739 | -3.014053 |
| H | -1.858338 | 1.094514  | 2.851719  | H | 3.993234  | -2.990392 | -2.861654 |
| C | -4.168518 | 2.574564  | 0.118616  | C | 0.222862  | -3.050076 | -1.944325 |
| H | -2.370058 | 3.035979  | -0.962352 | C | 0.778688  | -4.091950 | -2.696182 |
| C | -4.722789 | 2.001316  | 1.264673  | H | 2.570155  | -4.887424 | -3.600998 |
| H | -4.302934 | 1.026667  | 3.142784  | H | -0.841538 | -3.073120 | -1.721071 |
| H | -4.816912 | 2.987001  | -0.649007 | H | 0.146381  | -4.909033 | -3.037339 |
| H | -5.801082 | 1.959443  | 1.386576  | C | 6.707813  | 0.331117  | -1.954253 |
| P | -0.142482 | 1.805652  | 0.553869  | H | 7.008331  | 1.244613  | -1.426340 |
| C | 5.596423  | -1.087588 | 2.154725  | H | 7.493414  | -0.423927 | -1.825794 |
| C | 6.075930  | -0.596077 | 0.931140  | H | 6.581246  | 0.547595  | -3.016714 |
| C | 5.194390  | -0.570337 | -0.145292 | C | -1.681635 | -1.116206 | -0.010189 |
| C | 3.862632  | -1.001619 | -0.026207 | C | -2.723876 | -0.929939 | -0.804791 |
| C | 3.410105  | -1.508019 | 1.180757  | H | -2.592570 | -0.487133 | -1.785362 |
| C | 4.283414  | -1.546339 | 2.281550  | C | -0.613053 | -2.914036 | 1.431400  |
| H | 6.265620  | -1.121842 | 3.010518  | C | -1.607090 | -3.512417 | 2.445382  |
| H | 7.101423  | -0.254375 | 0.828692  | H | 0.399023  | -2.909331 | 1.855358  |
| H | 2.387623  | -1.864199 | 1.265319  | H | -0.576818 | -3.523747 | 0.526724  |
| H | 3.935642  | -1.940741 | 3.232431  | C | -1.258430 | -4.958975 | 2.815596  |
| N | 5.440051  | -0.154969 | -1.458924 | H | -1.619222 | -2.894884 | 3.356236  |
| C | 4.311708  | -0.315227 | -2.258448 | H | -2.616574 | -3.456084 | 2.021183  |
| O | 4.266504  | -0.071281 | -3.451354 | C | -2.245746 | -5.561722 | 3.820339  |
| C | 3.151009  | -0.777205 | -1.349577 | H | -1.241482 | -5.570329 | 1.902483  |
| C | 2.124758  | 0.385652  | -1.268253 | H | -0.239980 | -4.996301 | 3.228233  |
| H | 2.541545  | 1.247370  | -0.732850 | H | -1.983776 | -6.596717 | 4.068577  |



|              |           |           |           |    |           |           |           |
|--------------|-----------|-----------|-----------|----|-----------|-----------|-----------|
| H            | -2.258494 | -4.985704 | 4.754130  | H  | 0.462981  | 3.510503  | 3.976154  |
| H            | -3.265520 | -5.559639 | 3.416706  | H  | 2.405165  | 5.065327  | 4.064417  |
| C            | -4.090306 | -1.279819 | -0.316234 | C  | 3.042970  | 1.502838  | -1.396928 |
| C            | -5.275699 | -0.759456 | -1.077301 | C  | 4.448313  | 1.532888  | -1.418414 |
| C            | -6.545357 | -1.221973 | -0.694188 | C  | 2.339054  | 1.888776  | -2.549293 |
| C            | -5.181213 | 0.182801  | -2.113532 | C  | 5.130855  | 1.953697  | -2.559774 |
| C            | -7.691652 | -0.761580 | -1.335442 | H  | 5.010854  | 1.206383  | -0.549026 |
| H            | -6.604447 | -1.942997 | 0.114291  | C  | 3.025180  | 2.307519  | -3.691316 |
| C            | -6.330409 | 0.647639  | -2.753631 | H  | 1.253202  | 1.863877  | -2.545902 |
| H            | -4.217937 | 0.581412  | -2.410892 | C  | 4.420377  | 2.343179  | -3.698593 |
| C            | -7.586922 | 0.175775  | -2.368159 | H  | 6.217527  | 1.972330  | -2.561046 |
| H            | -8.667595 | -1.130992 | -1.032311 | H  | 2.464664  | 2.605126  | -4.573295 |
| H            | -6.243963 | 1.379594  | -3.552084 | H  | 4.953622  | 2.668091  | -4.588104 |
| H            | -8.480933 | 0.536934  | -2.869602 | C  | 3.194000  | -0.337459 | 0.802347  |
| O            | -4.256643 | -1.961729 | 0.690623  | C  | 3.794322  | -1.297219 | -0.029011 |
| C            | -1.018855 | -1.497099 | 1.094732  | C  | 3.412185  | -0.416066 | 2.185757  |
| H            | -0.971176 | -0.792563 | 1.925218  | C  | 4.597276  | -2.303203 | 0.507479  |
| Pd           | 0.359391  | -0.346988 | -0.433292 | H  | 3.650274  | -1.253874 | -1.101814 |
|              |           |           |           | C  | 4.216938  | -1.422545 | 2.720120  |
| <b>INT7B</b> |           |           |           | H  | 2.956428  | 0.310011  | 2.850230  |
| C            | 3.382443  | 4.177587  | 2.358324  | C  | 4.814517  | -2.367472 | 1.884831  |
| C            | 3.324778  | 3.188455  | 1.375270  | H  | 5.053226  | -3.033469 | -0.155910 |
| C            | 2.235342  | 2.308861  | 1.320901  | H  | 4.370331  | -1.468986 | 3.794583  |
| C            | 1.206738  | 2.438153  | 2.265486  | H  | 5.441131  | -3.149987 | 2.304555  |
| C            | 1.271399  | 3.417891  | 3.256046  | P  | 2.079762  | 0.952663  | 0.080123  |
| C            | 2.359307  | 4.292000  | 3.302350  | Pd | -0.211617 | 0.485150  | -0.554266 |
| H            | 4.226762  | 4.861422  | 2.384225  | C  | -4.785696 | -0.146491 | 2.882520  |
| H            | 4.121614  | 3.117557  | 0.642357  | C  | -5.492195 | -0.017609 | 1.676695  |
| H            | 0.343616  | 1.783588  | 2.204071  | C  | -4.824094 | 0.541822  | 0.591178  |

|   |           |           |           |   |           |           |           |
|---|-----------|-----------|-----------|---|-----------|-----------|-----------|
| C | -3.483969 | 0.952476  | 0.676222  | C | 1.375457  | -3.385688 | 1.730604  |
| C | -2.810829 | 0.851182  | 1.880596  | C | 0.527438  | -2.310138 | 1.439800  |
| C | -3.463910 | 0.291587  | 2.991958  | C | 0.076659  | -1.500886 | 2.497164  |
| H | -5.284397 | -0.579646 | 3.745776  | C | 0.428176  | -1.786985 | 3.815687  |
| H | -6.525930 | -0.340271 | 1.596726  | C | 1.255515  | -2.875733 | 4.097007  |
| H | -1.789410 | 1.212105  | 1.949555  | H | 2.404669  | -4.494735 | 3.256760  |
| H | -2.940742 | 0.204716  | 3.940718  | H | 1.782741  | -3.995546 | 0.933276  |
| N | -5.313484 | 0.802270  | -0.692094 | H | -0.555953 | -0.645720 | 2.283447  |
| C | -4.348253 | 1.425556  | -1.484254 | H | 0.060829  | -1.154031 | 4.619338  |
| O | -4.539938 | 1.823487  | -2.619535 | H | 1.536834  | -3.098935 | 5.122693  |
| C | -3.021911 | 1.411209  | -0.694883 | C | 0.929373  | -2.791370 | -1.468330 |
| C | -2.128475 | 0.331163  | -1.353919 | C | 1.039259  | -4.192592 | -1.482715 |
| H | -2.583958 | -0.655487 | -1.256980 | C | 1.589263  | -2.051360 | -2.461121 |
| H | -2.022106 | 0.570889  | -2.418839 | C | 1.833019  | -4.830647 | -2.435902 |
| C | -2.209177 | 2.680048  | -0.710401 | H | 0.485880  | -4.785469 | -0.760380 |
| C | -2.780484 | 3.954374  | -0.739047 | C | 2.379326  | -2.690484 | -3.419072 |
| C | -0.804739 | 2.489115  | -0.682459 | H | 1.486179  | -0.969991 | -2.481219 |
| C | -1.964032 | 5.085889  | -0.753652 | C | 2.511272  | -4.079878 | -3.400881 |
| H | -3.862241 | 4.061511  | -0.774503 | H | 1.914811  | -5.914262 | -2.431566 |
| C | -0.012819 | 3.649419  | -0.704441 | H | 2.886955  | -2.099948 | -4.176881 |
| C | -0.577750 | 4.929003  | -0.740017 | H | 3.127186  | -4.579283 | -4.143979 |
| H | -2.406362 | 6.078663  | -0.785577 | C | -1.716838 | -2.749687 | -0.310068 |
| H | 1.070175  | 3.579285  | -0.693905 | C | -2.150662 | -3.381560 | -1.485880 |
| H | 0.071168  | 5.802440  | -0.757915 | C | -2.616775 | -2.621247 | 0.759713  |
| C | -6.654455 | 0.514211  | -1.144531 | C | -3.447954 | -3.889566 | -1.580397 |
| H | -6.855509 | -0.563504 | -1.098731 | H | -1.482800 | -3.470501 | -2.336580 |
| H | -7.398141 | 1.038098  | -0.530789 | C | -3.913197 | -3.124307 | 0.659919  |
| H | -6.729989 | 0.857060  | -2.178287 | H | -2.327522 | -2.102820 | 1.666453  |
| C | 1.735783  | -3.663622 | 3.050349  | C | -4.333426 | -3.762025 | -0.509258 |

|                                                  |           |           |           |   |           |           |           |
|--------------------------------------------------|-----------|-----------|-----------|---|-----------|-----------|-----------|
| H                                                | -3.766253 | -4.376717 | -2.498309 | C | -1.866772 | -2.109227 | 0.248295  |
| H                                                | -4.596401 | -2.993395 | 1.493330  | C | -1.130302 | -1.197306 | -0.744966 |
| H                                                | -5.345815 | -4.149290 | -0.588050 | H | -0.411083 | -1.783429 | -1.333786 |
| P                                                | -0.090852 | -1.872141 | -0.245891 | H | -1.834369 | -0.724439 | -1.433862 |
|                                                  |           |           |           | C | -0.999394 | -2.511920 | 1.431739  |
| <b>Cs<sub>2</sub>CO<sub>3</sub>H<sup>+</sup></b> |           |           |           | C | -1.500699 | -3.516946 | 2.275859  |
| H                                                | 0.828606  | 2.864926  | -0.000362 | C | -0.952342 | -3.774668 | 3.526778  |
| C                                                | -0.099675 | 1.195555  | 0.000338  | H | -2.370153 | -4.079234 | 1.944198  |
| O                                                | 0.069750  | -0.053877 | 0.001470  | C | 0.631744  | -1.993958 | 3.146886  |
| O                                                | -1.152485 | 1.860446  | -0.001441 | C | 0.104136  | -2.983799 | 3.973833  |
| O                                                | 1.103585  | 1.932703  | 0.001087  | H | -1.361514 | -4.563354 | 4.152287  |
| Cs                                               | -3.072561 | -0.358218 | -0.000028 | H | 1.487668  | -1.438841 | 3.511371  |
| Cs                                               | 3.065336  | -0.368190 | -0.000165 | H | 0.540793  | -3.144250 | 4.956038  |
|                                                  |           |           |           | C | -5.540594 | -1.241085 | 0.451254  |
| <b>TS8A-E</b>                                    |           |           |           | H | -5.424495 | -0.367537 | 1.094341  |
| Pd                                               | 0.107223  | -0.000283 | 0.408821  | H | -5.971169 | -0.931423 | -0.508084 |
| C                                                | -4.342343 | -4.927892 | -1.804272 | H | -6.211023 | -1.964600 | 0.929882  |
| C                                                | -4.860168 | -3.805155 | -1.141964 | C | -0.663309 | 5.347689  | 1.970091  |
| C                                                | -3.958882 | -2.975375 | -0.484699 | C | -0.497727 | 4.522415  | 0.856097  |
| C                                                | -2.578718 | -3.229569 | -0.480700 | C | -0.891788 | 3.178706  | 0.909536  |
| C                                                | -2.080484 | -4.344930 | -1.135678 | C | -1.450290 | 2.669576  | 2.096016  |
| C                                                | -2.972382 | -5.200978 | -1.800075 | C | -1.627812 | 3.504659  | 3.199140  |
| H                                                | -5.023149 | -5.595745 | -2.325057 | C | -1.230868 | 4.843168  | 3.141201  |
| H                                                | -5.925713 | -3.596884 | -1.141821 | H | -0.340652 | 6.384214  | 1.921043  |
| H                                                | -1.013588 | -4.552812 | -1.124667 | H | -0.038453 | 4.925933  | -0.039529 |
| H                                                | -2.595114 | -6.080845 | -2.313193 | H | -1.741661 | 1.623817  | 2.153028  |
| N                                                | -4.226521 | -1.813600 | 0.256011  | H | -2.064815 | 3.102188  | 4.109001  |
| C                                                | -3.069232 | -1.265798 | 0.774867  | H | -1.355978 | 5.487351  | 4.007435  |
| O                                                | -3.025523 | -0.267507 | 1.477768  | C | -2.269737 | 1.929171  | -1.344148 |

|   |           |           |           |                |           |           |           |
|---|-----------|-----------|-----------|----------------|-----------|-----------|-----------|
| C | -3.472500 | 2.050151  | -0.634271 | C              | 4.164865  | -3.098326 | -1.737542 |
| C | -2.313548 | 1.605048  | -2.710517 | C              | 6.040366  | -3.123957 | -0.213190 |
| C | -4.693867 | 1.863450  | -1.283818 | C              | 4.904190  | -3.843338 | -2.657629 |
| H | -3.460940 | 2.273697  | 0.425785  | H              | 3.159346  | -2.780208 | -1.996153 |
| C | -3.536269 | 1.417043  | -3.355065 | C              | 6.775499  | -3.874980 | -1.126582 |
| H | -1.390174 | 1.500091  | -3.273174 | H              | 6.464404  | -2.820256 | 0.738443  |
| C | -4.731179 | 1.545658  | -2.642715 | C              | 6.208326  | -4.238356 | -2.352310 |
| H | -5.618334 | 1.966110  | -0.721806 | H              | 4.463080  | -4.111615 | -3.614151 |
| H | -3.553866 | 1.168321  | -4.412696 | H              | 7.791711  | -4.177143 | -0.886680 |
| H | -5.684038 | 1.400029  | -3.144587 | H              | 6.782051  | -4.822345 | -3.067462 |
| C | 0.451767  | 2.825411  | -1.692476 | C              | 1.960821  | 0.348688  | 1.692490  |
| C | 0.036941  | 3.956751  | -2.416292 | H              | 1.521867  | 0.557148  | 2.666850  |
| C | 1.748418  | 2.328153  | -1.884652 | C              | 3.119130  | 1.244505  | 1.306700  |
| C | 0.918153  | 4.595294  | -3.288424 | C              | 2.766852  | 2.731659  | 1.409485  |
| H | -0.975830 | 4.332700  | -2.300791 | H              | 3.441121  | 1.006431  | 0.285025  |
| C | 2.628507  | 2.968261  | -2.759561 | H              | 3.986270  | 1.010044  | 1.939336  |
| H | 2.066148  | 1.442742  | -1.344219 | C              | 3.881195  | 3.664486  | 0.925418  |
| C | 2.217139  | 4.105746  | -3.456020 | H              | 1.865705  | 2.925873  | 0.820516  |
| H | 0.590774  | 5.473039  | -3.838973 | H              | 2.499720  | 2.979173  | 2.447738  |
| H | 3.632694  | 2.576180  | -2.893552 | C              | 3.438643  | 5.131345  | 0.894578  |
| H | 2.902583  | 4.606401  | -4.134380 | H              | 4.768097  | 3.549412  | 1.563801  |
| P | -0.643832 | 1.992592  | -0.479102 | H              | 4.187732  | 3.360060  | -0.085647 |
| C | 0.134732  | -1.757221 | 1.848733  | H              | 4.249950  | 5.794483  | 0.571941  |
| C | 1.804733  | -0.936319 | 1.152170  | H              | 2.598789  | 5.264620  | 0.200835  |
| C | 2.533545  | -1.825692 | 0.417949  | H              | 3.103275  | 5.464234  | 1.884865  |
| H | 2.008402  | -2.548255 | -0.196264 |                |           |           |           |
| C | 3.991617  | -1.910168 | 0.526319  | <b>INT8A-E</b> |           |           |           |
| O | 4.631282  | -1.357495 | 1.427402  | Pd             | 0.796248  | 0.297106  | -0.844214 |
| C | 4.723005  | -2.735356 | -0.502184 | C              | -2.531624 | 6.460450  | -0.993577 |

|   |           |           |           |   |          |           |           |
|---|-----------|-----------|-----------|---|----------|-----------|-----------|
| C | -1.135553 | 6.325884  | -1.029541 | C | 4.364470 | -1.456393 | 3.603574  |
| C | -0.611478 | 5.061506  | -0.793488 | C | 4.056325 | -1.633970 | 2.256451  |
| C | -1.425324 | 3.950616  | -0.530404 | C | 3.030974 | -0.883124 | 1.657382  |
| C | -2.802253 | 4.095863  | -0.494903 | C | 2.325854 | 0.052253  | 2.427724  |
| C | -3.355937 | 5.363399  | -0.731040 | C | 2.637511 | 0.228479  | 3.778831  |
| H | -2.974099 | 7.435877  | -1.175752 | C | 3.653510 | -0.523873 | 4.367375  |
| H | -0.495100 | 7.177854  | -1.236636 | H | 5.159158 | -2.042002 | 4.058430  |
| H | -3.434253 | 3.234280  | -0.295552 | H | 4.614175 | -2.356168 | 1.666672  |
| H | -4.434318 | 5.492234  | -0.712008 | H | 1.536101 | 0.643154  | 1.975476  |
| N | 0.745928  | 4.664885  | -0.789875 | H | 2.077509 | 0.954679  | 4.360030  |
| C | 0.857171  | 3.316499  | -0.579261 | H | 3.895719 | -0.386315 | 5.418093  |
| O | 1.900969  | 2.663448  | -0.675871 | C | 4.206720 | -0.815789 | -0.977537 |
| C | -0.547281 | 2.728002  | -0.323241 | C | 5.160329 | -1.827049 | -1.171595 |
| C | -0.674462 | 1.635733  | -1.409302 | C | 4.489720 | 0.488493  | -1.416696 |
| H | -1.693663 | 1.280074  | -1.541675 | C | 6.374768 | -1.540004 | -1.796188 |
| H | -0.321125 | 2.033639  | -2.373307 | H | 4.949911 | -2.842387 | -0.848513 |
| C | -0.657729 | 2.232396  | 1.137951  | C | 5.709166 | 0.771403  | -2.034605 |
| C | -0.191383 | 3.082728  | 2.152334  | H | 3.761396 | 1.281491  | -1.268627 |
| C | -0.254556 | 2.727421  | 3.498802  | C | 6.651951 | -0.240532 | -2.227684 |
| H | 0.230056  | 4.047204  | 1.880503  | H | 7.104328 | -2.331816 | -1.945175 |
| C | -1.294900 | 0.651346  | 2.869534  | H | 5.918616 | 1.783441  | -2.370840 |
| C | -0.811940 | 1.501683  | 3.863149  | H | 7.597806 | -0.019319 | -2.715110 |
| H | 0.124628  | 3.408764  | 4.255803  | C | 2.255319 | -2.878622 | -0.297836 |
| H | -1.733893 | -0.306494 | 3.136629  | C | 2.318579 | -3.470314 | -1.571642 |
| H | -0.872474 | 1.209693  | 4.908083  | C | 1.723314 | -3.619795 | 0.767571  |
| C | 1.853222  | 5.519941  | -1.166612 | C | 1.866502 | -4.773621 | -1.770523 |
| H | 1.707951  | 5.912194  | -2.180113 | H | 2.712820 | -2.904149 | -2.411221 |
| H | 1.941328  | 6.360896  | -0.469875 | C | 1.262796 | -4.922647 | 0.562993  |
| H | 2.764037  | 4.920188  | -1.134833 | H | 1.662596 | -3.178798 | 1.757711  |

|   |           |           |           |               |           |           |           |
|---|-----------|-----------|-----------|---------------|-----------|-----------|-----------|
| C | 1.330553  | -5.502338 | -0.704416 | H             | -1.391996 | -3.648381 | 0.533661  |
| H | 1.921823  | -5.216986 | -2.761046 | H             | -2.819816 | -2.647733 | 0.342905  |
| H | 0.846096  | -5.481381 | 1.396689  | C             | -3.518296 | -5.168239 | -0.479757 |
| H | 0.966538  | -6.513614 | -0.862948 | H             | -3.197553 | -3.605832 | -1.940197 |
| P | 2.598734  | -1.082863 | -0.122750 | H             | -1.807040 | -4.666607 | -1.717855 |
| C | -1.225157 | 0.994221  | 1.511961  | H             | -3.939209 | -5.892922 | -1.187220 |
| C | -1.763245 | 0.014954  | 0.505344  | H             | -2.962625 | -5.729048 | 0.283299  |
| C | -3.104373 | 0.092630  | 0.291806  | H             | -4.355090 | -4.664811 | 0.020735  |
| H | -3.661318 | 0.783382  | 0.924455  |               |           |           |           |
| C | -3.928909 | -0.605471 | -0.718649 | <b>TS8A-Z</b> |           |           |           |
| O | -3.602934 | -0.670803 | -1.904170 | Pd            | -0.196652 | 0.268682  | 0.492019  |
| C | -5.224294 | -1.217171 | -0.267064 | C             | 5.115310  | -3.742658 | -1.647651 |
| C | -5.531900 | -1.394133 | 1.090231  | C             | 4.024406  | -4.387306 | -1.045487 |
| C | -6.122423 | -1.683172 | -1.239644 | C             | 3.086079  | -3.587740 | -0.403098 |
| C | -6.720173 | -2.020457 | 1.468298  | C             | 3.207184  | -2.191372 | -0.354853 |
| H | -4.829170 | -1.061184 | 1.848220  | C             | 4.287096  | -1.561563 | -0.955206 |
| C | -7.309435 | -2.305041 | -0.862691 | C             | 5.248956  | -2.352253 | -1.603141 |
| H | -5.860874 | -1.551067 | -2.284567 | H             | 5.867010  | -4.340354 | -2.156570 |
| C | -7.611182 | -2.474388 | 0.493082  | H             | 3.921139  | -5.467673 | -1.081032 |
| H | -6.947637 | -2.159539 | 2.521823  | H             | 4.363941  | -0.479069 | -0.918007 |
| H | -8.000313 | -2.661940 | -1.621925 | H             | 6.104197  | -1.878577 | -2.077095 |
| H | -8.536264 | -2.963270 | 0.787525  | N             | 1.920308  | -3.984310 | 0.275791  |
| C | -0.739838 | -0.915074 | -0.035514 | C             | 1.239432  | -2.898273 | 0.788050  |
| H | -0.174589 | -1.289584 | 0.830226  | O             | 0.193325  | -2.964853 | 1.419380  |
| C | -1.139332 | -2.076307 | -0.934110 | C             | 2.005020  | -1.611225 | 0.358037  |
| C | -2.008092 | -3.129837 | -0.215053 | C             | 1.081099  | -0.893351 | -0.631646 |
| H | -0.232104 | -2.574565 | -1.286742 | H             | 1.625519  | -0.090514 | -1.140742 |
| H | -1.660766 | -1.700149 | -1.815894 | H             | 0.669486  | -1.596840 | -1.359101 |
| C | -2.616264 | -4.148923 | -1.182617 | C             | 2.294027  | -0.788474 | 1.601844  |

|   |           |           |           |   |           |           |           |
|---|-----------|-----------|-----------|---|-----------|-----------|-----------|
| C | 3.269165  | -1.271038 | 2.485499  | H | -1.547502 | -1.072065 | -3.395390 |
| C | 3.423608  | -0.752357 | 3.767404  | C | -1.300806 | -4.433529 | -2.952898 |
| H | 3.900974  | -2.092774 | 2.157075  | H | -1.639280 | -5.460939 | -1.085943 |
| C | 1.583945  | 0.747788  | 3.333905  | H | -1.025168 | -3.129246 | -4.650665 |
| C | 2.554458  | 0.245140  | 4.201379  | H | -1.064954 | -5.339122 | -3.505342 |
| H | 4.196145  | -1.141702 | 4.425218  | C | -2.933066 | 0.599826  | -1.728653 |
| H | 0.954575  | 1.550540  | 3.697574  | C | -4.033399 | 0.193385  | -2.503129 |
| H | 2.633542  | 0.652429  | 5.206039  | C | -2.465954 | 1.916671  | -1.842596 |
| C | 1.453236  | -5.348128 | 0.388326  | C | -4.673880 | 1.101173  | -3.346077 |
| H | 0.535387  | -5.333265 | 0.978275  | H | -4.382947 | -0.833940 | -2.450223 |
| H | 1.243007  | -5.766305 | -0.603443 | C | -3.106887 | 2.823180  | -2.689557 |
| H | 2.201375  | -5.974574 | 0.888399  | H | -1.600760 | 2.226222  | -1.265197 |
| C | -5.522544 | -0.818964 | 1.772516  | C | -4.215360 | 2.419072  | -3.435353 |
| C | -4.668007 | -0.556681 | 0.699920  | H | -5.527837 | 0.779634  | -3.936026 |
| C | -3.316642 | -0.922133 | 0.767887  | H | -2.737140 | 3.841838  | -2.765995 |
| C | -2.830072 | -1.551852 | 1.928724  | H | -4.716421 | 3.124768  | -4.092308 |
| C | -3.694179 | -1.824983 | 2.989259  | P | -2.094866 | -0.536502 | -0.556653 |
| C | -5.039859 | -1.455826 | 2.916803  | C | 1.454995  | 0.283438  | 2.010965  |
| H | -6.565145 | -0.518375 | 1.712055  | C | 0.589457  | 1.998605  | 1.309868  |
| H | -5.056654 | -0.046062 | -0.174110 | C | 1.441534  | 2.889406  | 0.715730  |
| H | -1.779756 | -1.823002 | 2.002752  | H | 1.266189  | 3.932253  | 0.969685  |
| H | -3.308271 | -2.316214 | 3.878386  | C | 2.618596  | 2.577914  | -0.074067 |
| H | -5.706821 | -1.657244 | 3.750861  | O | 3.023476  | 1.424444  | -0.287810 |
| C | -1.909276 | -2.094017 | -1.522696 | C | 3.418191  | 3.734989  | -0.617732 |
| C | -1.922959 | -3.341076 | -0.881584 | C | 2.861262  | 4.995463  | -0.881631 |
| C | -1.577990 | -2.030845 | -2.886172 | C | 4.773295  | 3.519600  | -0.911293 |
| C | -1.623445 | -4.501631 | -1.596234 | C | 3.643840  | 6.019015  | -1.418002 |
| H | -2.140671 | -3.410207 | 0.177185  | H | 1.806432  | 5.173586  | -0.694390 |
| C | -1.279549 | -3.194116 | -3.596252 | C | 5.559337  | 4.544672  | -1.431865 |

|                |           |           |           |   |           |           |           |
|----------------|-----------|-----------|-----------|---|-----------|-----------|-----------|
| H              | 5.189425  | 2.535882  | -0.719756 | H | 5.357711  | -5.659850 | -1.084873 |
| C              | 4.996286  | 5.798914  | -1.687324 | H | 2.933009  | -6.207598 | -1.300110 |
| H              | 3.196672  | 6.987234  | -1.627995 | H | 4.396515  | -1.567933 | -0.106013 |
| H              | 6.610956  | 4.367486  | -1.642296 | H | 6.082057  | -3.366422 | -0.499071 |
| H              | 5.607244  | 6.598248  | -2.098804 | N | 0.929611  | -4.241291 | -0.920889 |
| C              | -0.717241 | 2.065724  | 1.808968  | C | 0.380105  | -3.013787 | -0.710016 |
| H              | -0.957041 | 1.548543  | 2.736312  | O | -0.816682 | -2.727918 | -0.879053 |
| C              | -1.646817 | 3.208866  | 1.451468  | C | 1.494470  | -1.996407 | -0.388279 |
| C              | -3.121518 | 2.788516  | 1.455459  | C | 1.244307  | -0.905543 | -1.453197 |
| H              | -1.376742 | 3.604160  | 0.463368  | H | 2.060836  | -0.189266 | -1.508895 |
| H              | -1.507716 | 4.045571  | 2.157320  | H | 1.110056  | -1.364384 | -2.443647 |
| C              | -4.080701 | 3.875835  | 0.962297  | C | 1.387870  | -1.479692 | 1.064960  |
| H              | -3.234664 | 1.904606  | 0.821318  | C | 1.273736  | -2.442161 | 2.079482  |
| H              | -3.410223 | 2.466297  | 2.466692  | C | 1.189601  | -2.091571 | 3.424235  |
| C              | -5.524636 | 3.372720  | 0.860642  | H | 1.252691  | -3.493765 | 1.804153  |
| H              | -4.031602 | 4.749381  | 1.627826  | C | 1.371064  | 0.223220  | 2.793620  |
| H              | -3.749353 | 4.220836  | -0.027769 | C | 1.237431  | -0.744380 | 3.785210  |
| H              | -6.207409 | 4.162464  | 0.526148  | H | 1.094291  | -2.865168 | 4.181521  |
| H              | -5.593364 | 2.543289  | 0.145669  | H | 1.428598  | 1.274092  | 3.063779  |
| H              | -5.883508 | 3.003248  | 1.829363  | H | 1.178126  | -0.448358 | 4.829048  |
|                |           |           |           | C | 0.182265  | -5.406171 | -1.350505 |
|                |           |           |           | H | 0.501631  | -5.717215 | -2.352012 |
| <b>INT8A-Z</b> |           |           |           | H | 0.339062  | -6.237133 | -0.654108 |
| Pd             | -0.663833 | -0.302724 | -0.873517 | H | -0.875130 | -5.138777 | -1.370280 |
| C              | 4.615355  | -4.880894 | -0.933920 | C | -4.835065 | -1.134174 | 3.278980  |
| C              | 3.255211  | -5.198907 | -1.059719 | C | -4.582902 | -0.633402 | 2.002935  |
| C              | 2.343479  | -4.171208 | -0.859188 | C | -3.265206 | -0.540136 | 1.525478  |
| C              | 2.737041  | -2.860605 | -0.552166 | C | -2.206875 | -0.960825 | 2.344094  |
| C              | 4.083897  | -2.563208 | -0.403765 | C | -2.463325 | -1.459111 | 3.624077  |
| C              | 5.023559  | -3.585520 | -0.606665 |   |           |           |           |



|   |           |           |           |   |           |           |           |
|---|-----------|-----------|-----------|---|-----------|-----------|-----------|
| C | -3.774334 | -1.546232 | 4.092668  | C | 1.444963  | -0.117397 | 1.433964  |
| H | -5.858287 | -1.205562 | 3.638568  | C | 1.490514  | 1.038451  | 0.472896  |
| H | -5.411747 | -0.322292 | 1.373363  | C | 2.661910  | 1.664225  | 0.157681  |
| H | -1.184654 | -0.905976 | 1.985831  | H | 2.606661  | 2.546307  | -0.466212 |
| H | -1.629850 | -1.778967 | 4.241863  | C | 3.998365  | 1.224897  | 0.560059  |
| H | -3.973510 | -1.937042 | 5.087224  | O | 4.205617  | 0.264632  | 1.311952  |
| C | -4.217312 | -0.529029 | -1.204807 | C | 5.185749  | 1.988372  | 0.023545  |
| C | -5.462510 | 0.091746  | -1.387898 | C | 5.133750  | 2.827308  | -1.100865 |
| C | -3.964477 | -1.758858 | -1.836519 | C | 6.416603  | 1.811477  | 0.676094  |
| C | -6.437347 | -0.505590 | -2.189192 | C | 6.281736  | 3.479165  | -1.553955 |
| H | -5.669746 | 1.045913  | -0.912678 | H | 4.205119  | 2.957751  | -1.646905 |
| C | -4.945141 | -2.354392 | -2.630949 | C | 7.559558  | 2.471295  | 0.232872  |
| H | -3.005768 | -2.251655 | -1.699542 | H | 6.448015  | 1.145541  | 1.532271  |
| C | -6.181286 | -1.729423 | -2.811265 | C | 7.495275  | 3.309136  | -0.884975 |
| H | -7.397050 | -0.013988 | -2.325836 | H | 6.227744  | 4.117586  | -2.431893 |
| H | -4.739458 | -3.305523 | -3.114937 | H | 8.502602  | 2.332156  | 0.755208  |
| H | -6.940849 | -2.192254 | -3.435691 | H | 8.387216  | 3.822340  | -1.235113 |
| C | -3.291817 | 1.940382  | 0.040356  | C | 0.172260  | 1.456882  | -0.058774 |
| C | -3.449962 | 2.724700  | -1.115704 | H | -0.521277 | 1.575370  | 0.783170  |
| C | -3.302419 | 2.571303  | 1.292827  | C | 0.101130  | 2.673108  | -0.975800 |
| C | -3.628060 | 4.103824  | -1.018874 | C | 0.150382  | 4.012603  | -0.218546 |
| H | -3.431454 | 2.252517  | -2.094726 | H | -0.842329 | 2.640845  | -1.529163 |
| C | -3.471011 | 3.955431  | 1.386705  | H | 0.895038  | 2.624668  | -1.733036 |
| H | -3.181517 | 1.982526  | 2.196780  | C | 0.023274  | 5.227520  | -1.143909 |
| C | -3.634472 | 4.724662  | 0.234145  | H | -0.675449 | 4.028119  | 0.505595  |
| H | -3.752504 | 4.695614  | -1.921608 | H | 1.077432  | 4.086636  | 0.366271  |
| H | -3.473619 | 4.430258  | 2.364166  | C | -0.050260 | 6.551841  | -0.377614 |
| H | -3.762762 | 5.800964  | 0.308236  | H | 0.871986  | 5.246942  | -1.842846 |
| P | -2.883014 | 0.154739  | -0.137284 | H | -0.880421 | 5.111706  | -1.758750 |

|               |           |           |           |    |           |           |           |
|---------------|-----------|-----------|-----------|----|-----------|-----------|-----------|
| H             | -0.137254 | 7.409178  | -1.055678 | C  | -4.254114 | -1.073279 | -0.863467 |
| H             | -0.919702 | 6.562085  | 0.291968  | C  | -3.275680 | 0.401955  | -3.024058 |
| H             | 0.844236  | 6.702017  | 0.239748  | H  | -1.316862 | -0.065678 | -2.254526 |
|               |           |           |           | C  | -5.140476 | -0.479210 | -1.764278 |
| <b>TS8B-E</b> |           |           |           | H  | -4.647038 | -1.631042 | -0.020313 |
| C             | -4.060452 | -2.739327 | 3.278407  | C  | -4.653408 | 0.258314  | -2.845995 |
| C             | -3.458365 | -2.719550 | 2.020536  | H  | -2.889472 | 0.983707  | -3.856097 |
| C             | -2.422664 | -1.811055 | 1.738562  | H  | -6.211428 | -0.588122 | -1.615129 |
| C             | -1.986136 | -0.946397 | 2.753328  | H  | -5.344250 | 0.728021  | -3.540567 |
| C             | -2.589957 | -0.969058 | 4.012096  | P  | -1.630919 | -1.743612 | 0.069493  |
| C             | -3.630442 | -1.860625 | 4.276014  | Pd | 0.366947  | -0.628765 | 0.114344  |
| H             | -4.860042 | -3.446799 | 3.480971  | C  | 7.137956  | 0.427636  | 2.103169  |
| H             | -3.781037 | -3.428218 | 1.263784  | C  | 6.777996  | 1.143793  | 0.952327  |
| H             | -1.172037 | -0.257162 | 2.554505  | C  | 5.549677  | 0.848758  | 0.371146  |
| H             | -2.240698 | -0.291199 | 4.786097  | C  | 4.690533  | -0.124052 | 0.902614  |
| H             | -4.098303 | -1.878979 | 5.256614  | C  | 5.060521  | -0.830199 | 2.035860  |
| C             | -1.703017 | -3.508657 | -0.439587 | C  | 6.295656  | -0.548795 | 2.640115  |
| C             | -2.211875 | -3.908925 | -1.681821 | H  | 8.092431  | 0.636251  | 2.578762  |
| C             | -1.140494 | -4.471695 | 0.414790  | H  | 7.436553  | 1.897343  | 0.531537  |
| C             | -2.159821 | -5.252545 | -2.062514 | H  | 4.405952  | -1.599726 | 2.436330  |
| H             | -2.645272 | -3.176409 | -2.355283 | H  | 6.600070  | -1.096908 | 3.527008  |
| C             | -1.096278 | -5.810676 | 0.034978  | N  | 4.972729  | 1.410547  | -0.777777 |
| H             | -0.723810 | -4.167013 | 1.370801  | C  | 3.744272  | 0.837328  | -1.060549 |
| C             | -1.604128 | -6.204262 | -1.207045 | O  | 3.053959  | 1.122261  | -2.025826 |
| H             | -2.554823 | -5.551776 | -3.029554 | C  | 3.423732  | -0.189046 | 0.067804  |
| H             | -0.655051 | -6.545615 | 0.702448  | C  | 3.118985  | -1.555506 | -0.539870 |
| H             | -1.562624 | -7.248034 | -1.506147 | C  | 4.176947  | -2.305292 | -1.072455 |
| C             | -2.868875 | -0.936738 | -1.037107 | C  | 1.777872  | -2.005936 | -0.616830 |
| C             | -2.388438 | -0.190203 | -2.124290 | C  | 3.934021  | -3.520781 | -1.708191 |

|   |           |           |           |                |           |           |           |
|---|-----------|-----------|-----------|----------------|-----------|-----------|-----------|
| H | 5.196665  | -1.934228 | -0.987295 | H              | -5.483771 | 6.281265  | 0.616904  |
| C | 1.570349  | -3.227214 | -1.282387 | H              | -7.070509 | 4.624564  | -0.342874 |
| C | 2.620388  | -3.977410 | -1.819304 | C              | 1.585837  | 2.978071  | 0.354028  |
| H | 4.759865  | -4.099062 | -2.115292 | C              | 1.376469  | 4.022987  | -0.755946 |
| H | 0.565467  | -3.613132 | -1.399417 | H              | 2.665756  | 2.824571  | 0.458959  |
| H | 2.408656  | -4.918448 | -2.323372 | H              | 1.192994  | 3.342640  | 1.306429  |
| C | 5.592992  | 2.420459  | -1.608394 | C              | 1.850586  | 5.415361  | -0.327753 |
| H | 5.777337  | 3.334013  | -1.030926 | H              | 1.923375  | 3.691166  | -1.649847 |
| H | 6.545434  | 2.058745  | -2.014038 | H              | 0.316623  | 4.078743  | -1.022129 |
| H | 4.906832  | 2.638521  | -2.428295 | C              | 1.693783  | 6.455702  | -1.441240 |
| C | 2.244426  | 0.312811  | 0.910990  | H              | 1.271672  | 5.724426  | 0.551706  |
| H | 1.949816  | -0.461260 | 1.638166  | H              | 2.903867  | 5.365520  | -0.012756 |
| H | 2.495212  | 1.179494  | 1.511211  | H              | 2.033996  | 7.446431  | -1.117402 |
| C | 0.877249  | 1.682220  | -0.032978 | H              | 2.273094  | 6.175421  | -2.330212 |
| H | 1.045225  | 1.471848  | -1.091662 | H              | 0.643428  | 6.544489  | -1.744343 |
| C | -0.411375 | 1.263129  | 0.435095  |                |           |           |           |
| C | -1.596353 | 1.818700  | 0.743472  | <b>INT8B-E</b> |           |           |           |
| H | -2.407793 | 1.164225  | 1.051398  | C              | -3.919281 | 1.938281  | 3.326535  |
| C | -1.953478 | 3.257219  | 0.669883  | C              | -3.746610 | 1.410177  | 2.044960  |
| O | -1.137160 | 4.162039  | 0.844595  | C              | -2.632175 | 1.771776  | 1.277277  |
| C | -3.392427 | 3.595429  | 0.398672  | C              | -1.697749 | 2.673395  | 1.811448  |
| C | -4.291639 | 2.668103  | -0.148933 | C              | -1.874395 | 3.206212  | 3.087527  |
| C | -3.831801 | 4.902791  | 0.661198  | C              | -2.985866 | 2.834666  | 3.850397  |
| C | -5.608822 | 3.039929  | -0.419095 | H              | -4.782824 | 1.643984  | 3.916984  |
| H | -3.963540 | 1.664026  | -0.389293 | H              | -4.467594 | 0.700756  | 1.651301  |
| C | -5.149446 | 5.269594  | 0.402256  | H              | -0.818497 | 2.949569  | 1.232425  |
| H | -3.118406 | 5.613219  | 1.066659  | H              | -1.140027 | 3.898005  | 3.490784  |
| C | -6.042314 | 4.337080  | -0.137966 | H              | -3.119267 | 3.238707  | 4.850144  |
| H | -6.290666 | 2.313690  | -0.853154 | C              | -3.429467 | -0.345176 | -0.557614 |

|    |           |           |           |   |           |           |           |
|----|-----------|-----------|-----------|---|-----------|-----------|-----------|
| C  | -4.461817 | -0.395589 | -1.502633 | H | -2.389093 | -1.459494 | 4.584109  |
| C  | -3.172192 | -1.469656 | 0.245305  | H | -1.917302 | -3.792007 | 3.820507  |
| C  | -5.225406 | -1.557467 | -1.643819 | H | 0.510924  | 0.068964  | 1.800217  |
| H  | -4.668910 | 0.462411  | -2.134490 | H | -1.131820 | 0.444167  | 3.614896  |
| C  | -3.940893 | -2.621653 | 0.105054  | N | 0.002025  | -4.335943 | 1.840356  |
| H  | -2.364535 | -1.449502 | 0.967150  | C | 1.042181  | -4.104612 | 0.958356  |
| C  | -4.966157 | -2.670997 | -0.844007 | O | 1.818192  | -4.955710 | 0.560119  |
| H  | -6.021045 | -1.589822 | -2.383450 | C | 0.989432  | -2.602455 | 0.541373  |
| H  | -3.723962 | -3.483817 | 0.729448  | C | 0.193845  | -2.550009 | -0.808491 |
| H  | -5.557319 | -3.575236 | -0.961773 | C | -0.116008 | -3.746628 | -1.483027 |
| C  | -2.955620 | 2.361012  | -1.536105 | C | -0.236726 | -1.339839 | -1.398497 |
| C  | -2.278329 | 2.589938  | -2.743510 | C | -0.825107 | -3.764935 | -2.683101 |
| C  | -4.116408 | 3.096022  | -1.248860 | H | 0.220516  | -4.695778 | -1.086035 |
| C  | -2.760204 | 3.531866  | -3.654992 | C | -0.937075 | -1.368455 | -2.613882 |
| H  | -1.370150 | 2.032875  | -2.962191 | C | -1.241575 | -2.568342 | -3.256464 |
| C  | -4.593603 | 4.038871  | -2.159001 | H | -1.040997 | -4.715811 | -3.162997 |
| H  | -4.640249 | 2.933472  | -0.310940 | H | -1.271740 | -0.438539 | -3.064796 |
| C  | -3.917526 | 4.256314  | -3.363503 | H | -1.795660 | -2.558885 | -4.191987 |
| H  | -2.228353 | 3.702654  | -4.586964 | C | -0.281701 | -5.634318 | 2.411988  |
| H  | -5.491459 | 4.605929  | -1.928330 | H | -0.062385 | -5.645330 | 3.487144  |
| H  | -4.290580 | 4.992857  | -4.070003 | H | -1.335513 | -5.896636 | 2.263501  |
| P  | -2.292209 | 1.083654  | -0.394850 | H | 0.352717  | -6.363564 | 1.905567  |
| Pd | 0.027086  | 0.506101  | -0.644545 | C | 2.451107  | -2.075450 | 0.420706  |
| C  | -1.666546 | -1.633576 | 3.791534  | H | 2.760296  | -1.644658 | 1.379485  |
| C  | -1.423134 | -2.944707 | 3.355135  | H | 3.077628  | -2.953965 | 0.239155  |
| C  | -0.498576 | -3.123220 | 2.332171  | C | 2.769814  | -1.056096 | -0.702423 |
| C  | 0.143786  | -2.046627 | 1.689819  | H | 2.370564  | -1.479133 | -1.633018 |
| C  | -0.048067 | -0.769046 | 2.198002  | C | 2.005504  | 0.211064  | -0.471897 |
| C  | -0.964961 | -0.561648 | 3.244051  | C | 2.381018  | 1.408037  | 0.027535  |

|               |          |           |           |   |           |           |           |
|---------------|----------|-----------|-----------|---|-----------|-----------|-----------|
| H             | 1.629664 | 2.220507  | 0.002273  | C | 5.705732  | -1.719877 | -0.403884 |
| C             | 3.616267 | 1.795343  | 0.757785  | C | 4.657223  | -1.166045 | 0.329968  |
| O             | 4.272566 | 0.984667  | 1.407114  | C | 3.345105  | -1.196044 | -0.173573 |
| C             | 4.007008 | 3.246615  | 0.748756  | C | 3.107399  | -1.771864 | -1.428935 |
| C             | 3.528184 | 4.150984  | -0.211447 | C | 4.157378  | -2.337090 | -2.153913 |
| C             | 4.910376 | 3.698420  | 1.723287  | C | 5.455535  | -2.314799 | -1.643795 |
| C             | 3.936775 | 5.485183  | -0.189493 | H | 6.716917  | -1.687717 | -0.007134 |
| H             | 2.857388 | 3.807241  | -0.993603 | H | 4.859246  | -0.699855 | 1.289663  |
| C             | 5.311223 | 5.031424  | 1.750373  | H | 2.105026  | -1.757504 | -1.844867 |
| H             | 5.284265 | 2.982043  | 2.447804  | H | 3.959779  | -2.776357 | -3.127387 |
| C             | 4.823167 | 5.928724  | 0.794454  | H | 6.273065  | -2.748942 | -2.213278 |
| H             | 3.567871 | 6.176169  | -0.942786 | C | 1.587951  | -1.821604 | 2.087032  |
| H             | 6.005398 | 5.373855  | 2.513258  | C | 0.307098  | -1.866968 | 2.662645  |
| H             | 5.137771 | 6.968955  | 0.813751  | C | 2.576393  | -2.705094 | 2.541584  |
| C             | 4.297466 | -0.917169 | -0.899751 | C | 0.031765  | -2.772139 | 3.687471  |
| C             | 4.892780 | -2.063899 | -1.727572 | H | -0.486313 | -1.222888 | 2.295068  |
| H             | 4.795410 | -0.852192 | 0.071543  | C | 2.289982  | -3.619009 | 3.557405  |
| H             | 4.504862 | 0.032427  | -1.411463 | H | 3.566549  | -2.697100 | 2.098025  |
| C             | 6.413987 | -1.954438 | -1.887481 | C | 1.019459  | -3.651971 | 4.135163  |
| H             | 4.651406 | -3.031488 | -1.265129 | H | -0.964934 | -2.798343 | 4.119184  |
| H             | 4.423085 | -2.078958 | -2.722795 | H | 3.061508  | -4.306765 | 3.893741  |
| C             | 7.008787 | -3.088378 | -2.729063 | H | 0.798187  | -4.366309 | 4.923920  |
| H             | 6.661223 | -0.985768 | -2.345292 | C | 2.553435  | 0.871035  | 1.737121  |
| H             | 6.881392 | -1.948709 | -0.892752 | C | 1.998627  | 1.176901  | 2.990124  |
| H             | 8.096369 | -2.990104 | -2.827440 | C | 3.477997  | 1.756856  | 1.168229  |
| H             | 6.800020 | -4.065449 | -2.275680 | C | 2.363218  | 2.348556  | 3.652998  |
| H             | 6.580246 | -3.095876 | -3.739254 | H | 1.283141  | 0.502597  | 3.450287  |
|               |          |           |           | C | 3.834861  | 2.931734  | 1.829442  |
| <b>TS8B-Z</b> |          |           |           | H | 3.907098  | 1.542492  | 0.196372  |

|    |           |           |           |   |           |           |           |
|----|-----------|-----------|-----------|---|-----------|-----------|-----------|
| C  | 3.278311  | 3.231303  | 3.073139  | H | -0.120462 | -5.425240 | -0.400953 |
| H  | 1.928933  | 2.571871  | 4.624059  | C | -5.496396 | -0.004826 | 2.153435  |
| H  | 4.523718  | 3.621197  | 1.351609  | H | -4.786488 | 0.124869  | 2.971772  |
| H  | 3.551417  | 4.149389  | 3.586331  | H | -6.072049 | 0.918175  | 2.016429  |
| P  | 1.911425  | -0.560961 | 0.777703  | H | -6.188355 | -0.820683 | 2.393825  |
| Pd | 0.003404  | -0.085945 | -0.398295 | C | -2.098725 | 0.317450  | -1.137665 |
| C  | -6.950909 | -0.860327 | -2.000716 | H | -1.567185 | -0.049594 | -2.031236 |
| C  | -6.640309 | -0.551324 | -0.668461 | H | -2.719923 | 1.129953  | -1.495601 |
| C  | -5.299971 | -0.578308 | -0.300087 | C | -1.281182 | 1.873758  | 0.134913  |
| C  | -4.283309 | -0.899172 | -1.210130 | H | -1.415877 | 1.435950  | 1.123862  |
| C  | -4.603582 | -1.207965 | -2.522746 | C | 0.070138  | 1.981079  | -0.323878 |
| C  | -5.949862 | -1.186556 | -2.918726 | C | 0.818997  | 3.052690  | -0.637413 |
| H  | -7.989955 | -0.848250 | -2.318204 | H | 0.532918  | 4.053239  | -0.307000 |
| H  | -7.419475 | -0.303604 | 0.045781  | C | 2.127495  | 3.054026  | -1.327170 |
| H  | -3.820162 | -1.476278 | -3.226376 | O | 2.926648  | 3.969442  | -1.128874 |
| H  | -6.214696 | -1.429626 | -3.943593 | C | 2.475625  | 1.983150  | -2.325253 |
| N  | -4.738235 | -0.314602 | 0.959847  | C | 1.507278  | 1.298935  | -3.075747 |
| C  | -3.362630 | -0.444402 | 0.937263  | C | 3.833019  | 1.743996  | -2.590055 |
| O  | -2.637530 | -0.283958 | 1.908989  | C | 1.890052  | 0.384094  | -4.058462 |
| C  | -2.937061 | -0.815159 | -0.515264 | H | 0.456856  | 1.510380  | -2.914159 |
| C  | -2.138960 | -2.120805 | -0.494266 | C | 4.215902  | 0.821059  | -3.558893 |
| C  | -2.809925 | -3.350904 | -0.484363 | H | 4.573878  | 2.307586  | -2.031594 |
| C  | -0.728191 | -2.047844 | -0.442535 | C | 3.243354  | 0.140257  | -4.297908 |
| C  | -2.090066 | -4.544767 | -0.451661 | H | 1.129829  | -0.132550 | -4.638475 |
| H  | -3.896901 | -3.377537 | -0.515336 | H | 5.269811  | 0.629214  | -3.739245 |
| C  | -0.035392 | -3.270163 | -0.412958 | H | 3.541093  | -0.576423 | -5.058928 |
| C  | -0.695610 | -4.501814 | -0.423762 | C | -2.325089 | 2.938134  | -0.157260 |
| H  | -2.614786 | -5.496947 | -0.451832 | C | -2.221126 | 4.074874  | 0.877787  |
| H  | 1.050012  | -3.276074 | -0.357341 | H | -3.335745 | 2.513126  | -0.099683 |

|                |           |           |           |    |           |           |           |
|----------------|-----------|-----------|-----------|----|-----------|-----------|-----------|
| H              | -2.185488 | 3.337063  | -1.169674 | H  | -0.522335 | -2.667571 | 0.820354  |
| C              | -3.266356 | 5.172319  | 0.638873  | C  | -1.615655 | -5.252333 | -1.095486 |
| H              | -2.352883 | 3.655276  | 1.885355  | H  | -3.106818 | -5.101194 | -2.646161 |
| H              | -1.217499 | 4.516003  | 0.856592  | H  | -0.162876 | -5.079294 | 0.497088  |
| C              | -3.183312 | 6.301047  | 1.671612  | H  | -1.445094 | -6.314361 | -1.250822 |
| H              | -3.132424 | 5.584552  | -0.370959 | C  | -3.452430 | -0.122974 | -1.644000 |
| H              | -4.270856 | 4.725859  | 0.657641  | C  | -3.053785 | 0.626371  | -2.760934 |
| H              | -3.936532 | 7.074070  | 1.481187  | C  | -4.813811 | -0.413691 | -1.461774 |
| H              | -3.344125 | 5.918466  | 2.687155  | C  | -4.000179 | 1.066247  | -3.688982 |
| H              | -2.197323 | 6.781036  | 1.650852  | H  | -2.003709 | 0.876308  | -2.891761 |
|                |           |           |           | C  | -5.757048 | 0.027358  | -2.389498 |
| <b>INT8B-Z</b> |           |           |           | H  | -5.132925 | -0.979431 | -0.590678 |
| C              | -4.103141 | -1.402230 | 3.133757  | C  | -5.350989 | 0.765864  | -3.505289 |
| C              | -3.525847 | -1.596542 | 1.876762  | H  | -3.681663 | 1.649091  | -4.548969 |
| C              | -2.981431 | -0.512856 | 1.174487  | H  | -6.809003 | -0.201575 | -2.240847 |
| C              | -3.029442 | 0.770880  | 1.744833  | H  | -6.088158 | 1.111276  | -4.225254 |
| C              | -3.611391 | 0.959653  | 2.998379  | P  | -2.164541 | -0.694716 | -0.465675 |
| C              | -4.145841 | -0.126323 | 3.698342  | Pd | -0.099452 | 0.538581  | -0.621057 |
| H              | -4.515514 | -2.251557 | 3.672170  | C  | -0.070807 | -2.296641 | 3.796818  |
| H              | -3.483421 | -2.594917 | 1.453762  | C  | 1.037711  | -3.066273 | 3.412956  |
| H              | -2.592927 | 1.613578  | 1.217774  | C  | 1.864697  | -2.555523 | 2.419239  |
| H              | -3.636957 | 1.955386  | 3.433403  | C  | 1.599983  | -1.339899 | 1.759166  |
| H              | -4.590503 | 0.021593  | 4.678936  | C  | 0.541731  | -0.562932 | 2.208499  |
| C              | -2.040719 | -2.507594 | -0.712605 | C  | -0.301167 | -1.047597 | 3.224262  |
| C              | -2.761525 | -3.203403 | -1.690335 | H  | -0.741772 | -2.671591 | 4.564807  |
| C              | -1.102910 | -3.198714 | 0.074420  | H  | 1.255671  | -4.015845 | 3.892117  |
| C              | -2.546596 | -4.571410 | -1.880127 | H  | 0.353265  | 0.411569  | 1.770814  |
| H              | -3.483715 | -2.683063 | -2.311600 | H  | -1.145523 | -0.448187 | 3.547588  |
| C              | -0.897472 | -4.562387 | -0.114089 | N  | 3.083212  | -3.083704 | 1.970620  |

|   |           |           |           |             |           |          |           |
|---|-----------|-----------|-----------|-------------|-----------|----------|-----------|
| C | 3.696307  | -2.206338 | 1.096427  | C           | -1.866050 | 5.014103 | 0.492487  |
| O | 4.857362  | -2.285307 | 0.731436  | C           | -0.051044 | 6.842892 | 1.566912  |
| C | 2.634056  | -1.158360 | 0.645747  | H           | 1.442021  | 5.335191 | 1.254030  |
| C | 2.060226  | -1.653802 | -0.721156 | C           | -2.306753 | 6.266854 | 0.908878  |
| C | 2.671991  | -2.731952 | -1.386695 | H           | -2.558147 | 4.291766 | 0.072864  |
| C | 0.940305  | -1.032650 | -1.322310 | C           | -1.400117 | 7.184894 | 1.448088  |
| C | 2.206997  | -3.202851 | -2.613689 | H           | 0.655352  | 7.550057 | 1.992673  |
| H | 3.547232  | -3.210330 | -0.964731 | H           | -3.356757 | 6.529868 | 0.813937  |
| C | 0.502698  | -1.512139 | -2.570644 | H           | -1.744252 | 8.162177 | 1.775986  |
| C | 1.114930  | -2.585974 | -3.215669 | C           | 4.057835  | 2.278025 | -0.775327 |
| H | 2.706205  | -4.041817 | -3.091599 | C           | 5.388881  | 1.780507 | -1.355630 |
| H | -0.357183 | -1.049291 | -3.049223 | H           | 4.237567  | 2.752255 | 0.201066  |
| H | 0.735853  | -2.933884 | -4.173819 | H           | 3.670663  | 3.066191 | -1.435286 |
| C | 3.759503  | -4.214266 | 2.568009  | C           | 6.426741  | 2.899341 | -1.510040 |
| H | 3.890814  | -4.065999 | 3.647403  | H           | 5.812063  | 0.987440 | -0.725389 |
| H | 3.186848  | -5.134669 | 2.405610  | H           | 5.201689  | 1.319767 | -2.336762 |
| H | 4.737775  | -4.302198 | 2.092573  | C           | 7.752118  | 2.404110 | -2.098434 |
| C | 3.337662  | 0.229385  | 0.546240  | H           | 6.013114  | 3.693293 | -2.148479 |
| H | 3.190929  | 0.771710  | 1.488217  | H           | 6.609392  | 3.360759 | -0.528764 |
| H | 4.405839  | 0.012885  | 0.461498  | H           | 8.477949  | 3.219484 | -2.199340 |
| C | 2.982028  | 1.176407  | -0.636097 | H           | 8.200567  | 1.631942 | -1.461220 |
| H | 3.008785  | 0.569109  | -1.549479 | H           | 7.601027  | 1.964320 | -3.092085 |
| C | 1.572998  | 1.672452  | -0.469527 |             |           |          |           |
| C | 1.292493  | 2.955626  | -0.067373 | <b>TS9A</b> |           |          |           |
| H | 2.064347  | 3.705759  | 0.081202  | Pd          | 1.074036  | 0.526217 | -0.771246 |
| C | -0.086242 | 3.310632  | 0.146062  | C           | -4.131371 | 5.431388 | -1.143570 |
| O | -0.996822 | 2.451010  | -0.054728 | C           | -2.777770 | 5.797654 | -1.146702 |
| C | -0.508642 | 4.662383  | 0.598506  | C           | -1.845311 | 4.806609 | -0.864941 |
| C | 0.394209  | 5.592052  | 1.141785  | C           | -2.220626 | 3.486253 | -0.576787 |



|   |           |           |           |   |          |           |           |
|---|-----------|-----------|-----------|---|----------|-----------|-----------|
| C | -3.560972 | 3.132172  | -0.593155 | C | 2.474052 | 0.214222  | 2.481741  |
| C | -4.519689 | 4.117186  | -0.877829 | C | 2.757381 | 0.369364  | 3.839987  |
| H | -4.884304 | 6.183736  | -1.362158 | C | 3.949924 | -0.128092 | 4.368149  |
| H | -2.471964 | 6.815212  | -1.369496 | H | 5.795339 | -1.163217 | 3.939025  |
| H | -3.858353 | 2.104584  | -0.412592 | H | 5.296536 | -1.441985 | 1.532576  |
| H | -5.572256 | 3.849977  | -0.896402 | H | 1.552083 | 0.619967  | 2.073190  |
| N | -0.444301 | 4.918688  | -0.845270 | H | 2.044178 | 0.887563  | 4.474698  |
| C | 0.154934  | 3.703559  | -0.591917 | H | 4.173704 | -0.002801 | 5.424515  |
| O | 1.360206  | 3.502052  | -0.590203 | C | 4.537314 | -0.500172 | -1.012115 |
| C | -0.964821 | 2.662653  | -0.309989 | C | 5.413460 | -1.574381 | -1.228447 |
| C | -0.799521 | 1.471685  | -1.292182 | C | 4.894569 | 0.778439  | -1.468736 |
| H | -1.741939 | 1.209922  | -1.768052 | C | 6.630418 | -1.370165 | -1.882174 |
| H | -0.098644 | 1.720543  | -2.122121 | H | 5.140087 | -2.571653 | -0.894929 |
| C | -0.893230 | 2.243512  | 1.172730  | C | 6.115546 | 0.981562  | -2.112425 |
| C | -0.353192 | 3.094858  | 2.143375  | H | 4.205333 | 1.607842  | -1.323513 |
| C | -0.339719 | 2.734165  | 3.491884  | C | 6.984962 | -0.092428 | -2.321153 |
| H | 0.075982  | 4.047182  | 1.849191  | H | 7.300651 | -2.209574 | -2.048960 |
| C | -1.437798 | 0.662766  | 2.938025  | H | 6.382847 | 1.975541  | -2.461401 |
| C | -0.884943 | 1.514935  | 3.894507  | H | 7.931712 | 0.064343  | -2.831414 |
| H | 0.098132  | 3.407874  | 4.223312  | C | 2.524000 | -2.455743 | -0.289352 |
| H | -1.854900 | -0.297252 | 3.230299  | C | 2.178940 | -2.934904 | -1.566403 |
| H | -0.875532 | 1.225409  | 4.941779  | C | 2.421256 | -3.321799 | 0.807191  |
| C | 0.291945  | 6.118862  | -1.182147 | C | 1.753533 | -4.249228 | -1.742856 |
| H | 0.055923  | 6.444137  | -2.202488 | H | 2.227833 | -2.262522 | -2.419605 |
| H | 0.043823  | 6.928911  | -0.486692 | C | 1.979191 | -4.637443 | 0.630461  |
| H | 1.355493  | 5.886072  | -1.110133 | H | 2.680391 | -2.971576 | 1.801457  |
| C | 4.861943  | -0.781154 | 3.533546  | C | 1.646558 | -5.105306 | -0.640756 |
| C | 4.579365  | -0.940771 | 2.176580  | H | 1.486765 | -4.601932 | -2.735465 |
| C | 3.379599  | -0.449347 | 1.638150  | H | 1.896393 | -5.295233 | 1.491855  |

|   |           |           |           |            |           |           |           |
|---|-----------|-----------|-----------|------------|-----------|-----------|-----------|
| H | 1.299186  | -6.126105 | -0.774994 | H          | -2.984660 | -3.422526 | -2.365705 |
| P | 2.923602  | -0.656420 | -0.139538 | H          | -1.327213 | -3.925160 | -2.692972 |
| C | -1.446354 | 1.014350  | 1.583583  | H          | -2.715592 | -5.908746 | -2.023200 |
| C | -2.009993 | 0.095430  | 0.554238  | H          | -1.470291 | -5.600750 | -0.796959 |
| C | -3.328627 | -0.211914 | 0.637622  | H          | -3.147432 | -5.106541 | -0.502672 |
| H | -3.867076 | 0.156085  | 1.510898  |            |           |           |           |
| C | -4.167324 | -0.938025 | -0.346282 | <b>3aa</b> |           |           |           |
| O | -4.184597 | -0.615864 | -1.534769 | C          | -6.196288 | -0.024642 | 0.820545  |
| C | -5.030521 | -2.059549 | 0.144050  | C          | -5.267840 | -0.515654 | 1.748796  |
| C | -4.897580 | -2.588924 | 1.436584  | C          | -3.932446 | -0.557771 | 1.363111  |
| C | -5.949069 | -2.639533 | -0.744996 | C          | -3.511674 | -0.129668 | 0.094949  |
| C | -5.673321 | -3.677791 | 1.835080  | C          | -4.439759 | 0.358390  | -0.811239 |
| H | -4.170169 | -2.161755 | 2.120407  | C          | -5.793556 | 0.408112  | -0.444159 |
| C | -6.723894 | -3.725015 | -0.346882 | H          | -7.246721 | 0.018031  | 1.095098  |
| H | -6.028490 | -2.224702 | -1.744592 | H          | -5.581734 | -0.849601 | 2.732772  |
| C | -6.587392 | -4.246182 | 0.944614  | H          | -4.121331 | 0.687681  | -1.796744 |
| H | -5.560136 | -4.086535 | 2.835457  | H          | -6.529972 | 0.785044  | -1.147710 |
| H | -7.432287 | -4.170050 | -1.040371 | N          | -2.829034 | -0.994006 | 2.107030  |
| H | -7.189464 | -5.096535 | 1.253915  | C          | -1.651190 | -0.868506 | 1.388281  |
| C | -0.974100 | -0.398805 | -0.383868 | O          | -0.544485 | -1.170999 | 1.794042  |
| H | -0.192903 | -0.814931 | 0.280448  | C          | -2.007087 | -0.262155 | 0.000694  |
| C | -1.278067 | -1.423841 | -1.467431 | C          | -1.492985 | -1.150657 | -1.122804 |
| C | -1.569588 | -2.809789 | -0.860944 | C          | -2.322196 | -2.046987 | -1.802465 |
| H | -0.397816 | -1.514969 | -2.112265 | C          | -0.127578 | -1.058791 | -1.475461 |
| H | -2.108174 | -1.097241 | -2.097005 | C          | -1.829955 | -2.823321 | -2.851186 |
| C | -2.075417 | -3.819738 | -1.893968 | H          | -3.365257 | -2.128776 | -1.515045 |
| H | -0.651631 | -3.191056 | -0.393669 | C          | 0.345483  | -1.829743 | -2.552026 |
| H | -2.310323 | -2.728143 | -0.056714 | C          | -0.493635 | -2.703234 | -3.236597 |
| C | -2.369561 | -5.188485 | -1.272331 | H          | -2.492698 | -3.507923 | -3.373451 |

|   |           |           |           |            |           |           |           |
|---|-----------|-----------|-----------|------------|-----------|-----------|-----------|
| H | 1.379465  | -1.719274 | -2.864600 | H          | 4.340259  | -1.798506 | -1.292276 |
| H | -0.108071 | -3.283269 | -4.070547 | C          | 6.983302  | -1.642050 | 0.832334  |
| C | -2.887032 | -1.511221 | 3.457540  | H          | 7.098377  | -0.385465 | 2.583287  |
| H | -3.295082 | -0.759240 | 4.143165  | H          | 6.582353  | -2.758741 | -0.968905 |
| H | -3.514838 | -2.409030 | 3.501390  | H          | 7.973166  | -2.068479 | 0.972632  |
| H | -1.868095 | -1.762885 | 3.756312  | O          | 2.856758  | 1.163912  | 0.930892  |
| C | 0.774842  | -0.184087 | -0.696081 | C          | 0.198749  | 1.111365  | -0.151758 |
| C | 2.058032  | -0.582183 | -0.485005 | H          | 0.556637  | 1.205629  | 0.875842  |
| H | 2.336678  | -1.560656 | -0.858753 | C          | -1.343720 | 1.130745  | -0.156765 |
| C | 0.752300  | 2.317734  | -0.950250 | H          | -1.712847 | 1.538562  | -1.106738 |
| C | 0.383674  | 3.673506  | -0.338614 | H          | -1.706609 | 1.796917  | 0.632428  |
| H | 0.382783  | 2.259920  | -1.985204 |            |           |           |           |
| H | 1.841590  | 2.239693  | -0.991190 | <b>4aa</b> |           |           |           |
| C | 1.002788  | 4.852420  | -1.098827 | C          | 5.762893  | -0.999415 | 0.161001  |
| H | -0.707999 | 3.800782  | -0.311439 | C          | 4.920567  | -1.364608 | -0.898203 |
| H | 0.727083  | 3.692366  | 0.705523  | C          | 3.574807  | -1.030659 | -0.793432 |
| C | 0.644389  | 6.210470  | -0.487371 | C          | 3.061612  | -0.354225 | 0.321700  |
| H | 2.094931  | 4.732967  | -1.118399 | C          | 3.903965  | -0.003086 | 1.364189  |
| H | 0.672537  | 4.821873  | -2.147350 | C          | 5.266597  | -0.327339 | 1.279685  |
| H | 1.099355  | 7.036681  | -1.045946 | H          | 6.819258  | -1.247753 | 0.106503  |
| H | -0.441720 | 6.367310  | -0.483577 | H          | 5.307089  | -1.888308 | -1.766885 |
| H | 0.991208  | 6.277408  | 0.551216  | H          | 3.508972  | 0.505416  | 2.239578  |
| C | 3.069297  | 0.104468  | 0.334326  | H          | 5.936765  | -0.057174 | 2.090368  |
| C | 4.421285  | -0.547233 | 0.473659  | N          | 2.544701  | -1.276773 | -1.711263 |
| C | 5.225967  | -0.147507 | 1.552603  | C          | 1.337784  | -0.759118 | -1.272056 |
| C | 4.925943  | -1.494386 | -0.430598 | O          | 0.303141  | -0.777818 | -1.915985 |
| C | 6.491611  | -0.695905 | 1.736726  | C          | 1.574400  | -0.130780 | 0.133380  |
| H | 4.832816  | 0.598194  | 2.235697  | C          | 0.711299  | -0.802998 | 1.202664  |
| C | 6.200744  | -2.033588 | -0.255054 | C          | 1.157443  | -1.954249 | 1.852214  |

|   |           |           |           |              |           |           |           |
|---|-----------|-----------|-----------|--------------|-----------|-----------|-----------|
| C | -0.548660 | -0.248696 | 1.531087  | C            | -2.682754 | -0.867963 | -1.295975 |
| C | 0.398871  | -2.554857 | 2.858284  | C            | -4.709394 | -2.792194 | -1.290449 |
| H | 2.120659  | -2.375962 | 1.581599  | H            | -5.374199 | -1.840751 | 0.533813  |
| C | -1.281370 | -0.846610 | 2.571316  | C            | -2.736240 | -1.826225 | -2.308123 |
| C | -0.816808 | -1.985420 | 3.227970  | H            | -1.874009 | -0.151576 | -1.302811 |
| H | 0.764787  | -3.450430 | 3.352738  | C            | -3.749416 | -2.785004 | -2.310200 |
| H | -2.230958 | -0.423972 | 2.877298  | H            | -5.497851 | -3.540334 | -1.290076 |
| H | -1.411828 | -2.424674 | 4.023906  | H            | -1.968429 | -1.822260 | -3.075372 |
| C | 2.714246  | -1.927921 | -2.992500 | H            | -3.791353 | -3.532086 | -3.099121 |
| H | 3.417598  | -1.369613 | -3.621895 | O            | -4.454824 | 0.054355  | 1.747232  |
| H | 3.091153  | -2.948578 | -2.859246 | C            | -0.242053 | 1.671385  | 0.041335  |
| H | 1.737175  | -1.959121 | -3.477058 | C            | 1.243401  | 1.375752  | 0.085202  |
| C | -1.084339 | 0.912085  | 0.777468  | H            | 1.680056  | 1.838478  | 0.982990  |
| C | -0.618982 | 2.876561  | -0.782591 | H            | 1.755105  | 1.831703  | -0.770167 |
| C | -0.219979 | 4.206198  | -0.109890 | C            | -2.564992 | 1.231981  | 0.915352  |
| H | -1.690597 | 2.901899  | -1.004757 | H            | -2.861247 | 1.946736  | 0.140703  |
| H | -0.111006 | 2.805115  | -1.755488 | H            | -2.750468 | 1.729894  | 1.874586  |
| C | -0.558346 | 5.433285  | -0.963191 |              |           |           |           |
| H | -0.727585 | 4.278765  | 0.862134  | <b>INT5C</b> |           |           |           |
| H | 0.857703  | 4.199957  | 0.107273  | C            | -0.954332 | 2.271577  | 4.687437  |
| C | -0.163834 | 6.751765  | -0.290610 | C            | -0.287827 | 2.401646  | 3.468159  |
| H | -0.052620 | 5.347921  | -1.935580 | C            | -0.174594 | 1.298989  | 2.608859  |
| H | -1.636142 | 5.437040  | -1.179289 | C            | -0.735444 | 0.066395  | 2.983248  |
| H | -0.415808 | 7.613936  | -0.918431 | C            | -1.393499 | -0.058642 | 4.206601  |
| H | -0.680353 | 6.874200  | 0.669369  | C            | -1.505919 | 1.042918  | 5.058493  |
| H | 0.914673  | 6.785741  | -0.092302 | H            | -1.039405 | 3.129676  | 5.347913  |
| C | -3.608522 | 0.100692  | 0.862691  | H            | 0.140932  | 3.358549  | 3.186632  |
| C | -3.632844 | -0.874265 | -0.266249 | H            | -0.663033 | -0.798199 | 2.328792  |
| C | -4.648686 | -1.847254 | -0.272985 | H            | -1.822102 | -1.016451 | 4.484396  |

|    |           |           |           |   |           |           |           |
|----|-----------|-----------|-----------|---|-----------|-----------|-----------|
| H  | -2.022554 | 0.944819  | 6.009043  | C | -4.564870 | -3.147799 | -1.808448 |
| C  | 0.742197  | 3.194946  | 0.588186  | C | -5.920090 | -3.384716 | -2.081430 |
| C  | 1.869967  | 4.014988  | 0.733344  | H | -7.943140 | -2.670023 | -1.904902 |
| C  | -0.453863 | 3.743651  | 0.090062  | H | -7.318450 | -0.576429 | -0.705464 |
| C  | 1.805144  | 5.363038  | 0.370694  | H | -3.805386 | -3.866539 | -2.102608 |
| H  | 2.796111  | 3.608953  | 1.126828  | H | -6.212114 | -4.292168 | -2.600572 |
| C  | -0.515329 | 5.092070  | -0.255802 | N | -4.610759 | 0.045467  | -0.107349 |
| H  | -1.335554 | 3.116688  | -0.016198 | C | -3.275727 | -0.092853 | -0.103999 |
| C  | 0.616454  | 5.902682  | -0.123601 | O | -2.433531 | 0.775930  | 0.231769  |
| H  | 2.684574  | 5.990763  | 0.481181  | C | -2.870890 | -1.448844 | -0.678121 |
| H  | -1.442522 | 5.509435  | -0.637412 | C | -1.836501 | -1.074374 | -1.761262 |
| H  | 0.570081  | 6.950713  | -0.404569 | H | -1.373092 | -1.944393 | -2.232910 |
| C  | 2.447546  | 0.925389  | 1.400596  | H | -2.292058 | -0.445574 | -2.533161 |
| C  | 3.453702  | 1.082156  | 0.429556  | C | -2.291160 | -2.315620 | 0.458005  |
| C  | 2.772775  | 0.314534  | 2.621512  | C | -3.029734 | -2.473881 | 1.640823  |
| C  | 4.754526  | 0.650753  | 0.679364  | C | -1.040999 | -2.940009 | 0.359098  |
| H  | 3.226611  | 1.542149  | -0.526086 | C | -2.521642 | -3.213325 | 2.706411  |
| C  | 4.077270  | -0.123942 | 2.864733  | H | -4.010737 | -2.015202 | 1.729140  |
| H  | 2.015106  | 0.186844  | 3.387212  | C | -0.529329 | -3.681011 | 1.430605  |
| C  | 5.069366  | 0.043183  | 1.897946  | H | -0.452411 | -2.862020 | -0.546440 |
| H  | 5.518004  | 0.775819  | -0.082490 | C | -1.261701 | -3.813359 | 2.609107  |
| H  | 4.315411  | -0.589770 | 3.816753  | H | -3.110441 | -3.324498 | 3.612569  |
| H  | 6.080687  | -0.304348 | 2.085944  | H | 0.441135  | -4.159773 | 1.332343  |
| P  | 0.722279  | 1.415184  | 1.017143  | H | -0.864535 | -4.388751 | 3.440052  |
| Pd | -0.521433 | 0.115007  | -0.643559 | C | -5.328569 | 1.232488  | 0.332678  |
| C  | -6.898688 | -2.467734 | -1.688621 | H | -5.835097 | 1.701083  | -0.517166 |
| C  | -6.557738 | -1.286433 | -1.013526 | H | -6.070628 | 0.957900  | 1.088147  |
| C  | -5.211431 | -1.072068 | -0.761310 | H | -4.607641 | 1.928774  | 0.762459  |
| C  | -4.214136 | -1.978027 | -1.152726 | C | 1.177883  | -0.652248 | -1.477653 |

|   |           |           |           |             |           |          |           |
|---|-----------|-----------|-----------|-------------|-----------|----------|-----------|
| C | 2.090053  | -1.489182 | -1.006667 | H           | -1.155561 | 4.998343 | -3.215875 |
| H | 1.996280  | -1.913253 | -0.014968 |             |           |          |           |
| C | 3.281209  | -1.788076 | -1.870003 | <b>TS6C</b> |           |          |           |
| O | 3.322535  | -1.370167 | -3.022798 | C           | -0.572379 | 4.578951 | 2.229874  |
| C | 4.397797  | -2.586097 | -1.287531 | C           | -0.758051 | 3.837166 | 1.064057  |
| C | 5.381507  | -3.070563 | -2.167785 | C           | -0.105423 | 2.601255 | 0.901108  |
| C | 4.522358  | -2.842712 | 0.088329  | C           | 0.723196  | 2.120168 | 1.925326  |
| C | 6.456422  | -3.809723 | -1.684931 | C           | 0.903786  | 2.866307 | 3.090873  |
| H | 5.278687  | -2.855573 | -3.226208 | C           | 0.258893  | 4.094342 | 3.244594  |
| C | 5.607354  | -3.573277 | 0.570875  | H           | -1.081130 | 5.531065 | 2.348434  |
| H | 3.803922  | -2.445453 | 0.796685  | H           | -1.417815 | 4.212725 | 0.287625  |
| C | 6.571158  | -4.063118 | -0.313585 | H           | 1.218906  | 1.161750 | 1.820558  |
| H | 7.206739  | -4.187856 | -2.373089 | H           | 1.544964  | 2.476861 | 3.874791  |
| H | 5.701493  | -3.757835 | 1.637214  | H           | 0.394796  | 4.670690 | 4.155104  |
| H | 7.411801  | -4.638519 | 0.063922  | C           | -2.108994 | 1.796357 | -1.043993 |
| C | 0.751634  | 0.163257  | -2.500710 | C           | -2.535443 | 1.804101 | -2.381101 |
| C | 1.254799  | 1.555550  | -2.782642 | C           | -3.072507 | 1.818149 | -0.021267 |
| H | 0.171408  | -0.294399 | -3.302639 | C           | -3.898130 | 1.829219 | -2.686734 |
| C | 0.169533  | 2.526660  | -3.266924 | H           | -1.813159 | 1.805406 | -3.189837 |
| H | 1.755053  | 1.968648  | -1.903160 | C           | -4.431197 | 1.846011 | -0.331147 |
| H | 2.026057  | 1.433755  | -3.559149 | H           | -2.768701 | 1.812920 | 1.018809  |
| C | 0.721203  | 3.935305  | -3.512543 | C           | -4.848607 | 1.847656 | -1.664090 |
| H | -0.290520 | 2.135773  | -4.185617 | H           | -4.212830 | 1.843733 | -3.726321 |
| H | -0.626570 | 2.576959  | -2.511878 | H           | -5.163723 | 1.860998 | 0.470381  |
| H | 1.181746  | 4.303785  | -2.586094 | H           | -5.907912 | 1.862254 | -1.902578 |
| H | 1.521159  | 3.887541  | -4.264173 | C           | 0.552393  | 2.513019 | -1.974078 |
| C | -0.361611 | 4.916763  | -3.968543 | C           | 0.759305  | 1.843068 | -3.193009 |
| H | 0.051378  | 5.918522  | -4.127937 | C           | 1.018003  | 3.826781 | -1.827415 |
| H | -0.823210 | 4.591221  | -4.908385 | C           | 1.394882  | 2.486689 | -4.253533 |

|   |           |           |           |    |           |           |           |
|---|-----------|-----------|-----------|----|-----------|-----------|-----------|
| H | 0.434235  | 0.811626  | -3.307038 | H  | 2.230169  | -2.423187 | 1.971476  |
| C | 1.666388  | 4.462771  | -2.888830 | C  | 3.892428  | 0.873616  | 3.131864  |
| H | 0.886004  | 4.356704  | -0.890349 | H  | 4.304957  | 1.236253  | 1.060421  |
| C | 1.851107  | 3.799007  | -4.102316 | C  | 3.315040  | 0.015780  | 4.071940  |
| H | 1.543929  | 1.960556  | -5.192014 | H  | 2.277413  | -1.852231 | 4.360355  |
| H | 2.026446  | 5.479790  | -2.763258 | H  | 4.363577  | 1.798467  | 3.452231  |
| H | 2.354275  | 4.298169  | -4.925203 | H  | 3.337242  | 0.264932  | 5.128881  |
| P | -0.324495 | 1.622183  | -0.628548 | C  | 3.327833  | -4.544019 | -1.264141 |
| C | 7.062380  | -2.113296 | -1.743211 | H  | 3.542962  | -4.678193 | -2.329131 |
| C | 5.991563  | -3.002368 | -1.575047 | H  | 3.965107  | -5.214872 | -0.680406 |
| C | 4.808092  | -2.479432 | -1.077275 | H  | 2.278888  | -4.770883 | -1.071228 |
| C | 4.655088  | -1.126594 | -0.734964 | Pd | 0.393420  | -0.530025 | -0.411597 |
| C | 5.721035  | -0.257612 | -0.918421 | C  | -1.581040 | -1.427169 | 0.046542  |
| C | 6.928029  | -0.759874 | -1.427432 | C  | -2.764669 | -1.400801 | -0.566550 |
| H | 8.005438  | -2.486121 | -2.130821 | H  | -2.979714 | -0.813478 | -1.447313 |
| H | 6.088697  | -4.052681 | -1.829962 | C  | -3.804672 | -2.237805 | 0.109429  |
| H | 5.629397  | 0.798216  | -0.684873 | O  | -3.490362 | -2.877342 | 1.120552  |
| H | 7.766212  | -0.086635 | -1.577918 | C  | -5.193459 | -2.280564 | -0.414118 |
| N | 3.576702  | -3.163894 | -0.876596 | C  | -6.146854 | -3.031528 | 0.298146  |
| C | 2.636143  | -2.298504 | -0.462986 | C  | -5.587948 | -1.602190 | -1.580613 |
| O | 1.406450  | -2.533384 | -0.371976 | C  | -7.463566 | -3.099780 | -0.143977 |
| C | 3.245091  | -0.931093 | -0.184187 | H  | -5.831087 | -3.553465 | 1.194975  |
| C | 2.334606  | 0.085298  | -0.920649 | C  | -6.908157 | -1.674062 | -2.021411 |
| H | 2.604051  | 1.111630  | -0.662731 | H  | -4.878021 | -1.014357 | -2.149628 |
| H | 2.414920  | -0.030827 | -2.006797 | C  | -7.847172 | -2.420391 | -1.305336 |
| C | 3.270654  | -0.639100 | 1.330129  | H  | -8.192348 | -3.681850 | 0.412301  |
| C | 2.703491  | -1.497760 | 2.280908  | H  | -7.203931 | -1.150242 | -2.925883 |
| C | 3.864991  | 0.549860  | 1.776044  | H  | -8.875387 | -2.474705 | -1.651805 |
| C | 2.721606  | -1.170455 | 3.640382  | C  | -1.194401 | -2.132405 | 1.156746  |

|              |           |           |           |   |           |           |           |
|--------------|-----------|-----------|-----------|---|-----------|-----------|-----------|
| C            | -1.117390 | -1.611976 | 2.558133  | C | -3.066753 | 1.918861  | 0.121598  |
| H            | -0.726934 | -3.103158 | 0.979927  | C | -3.769518 | 2.487535  | -2.518809 |
| C            | -1.846645 | -0.293214 | 2.799420  | H | -1.660412 | 2.556958  | -2.916385 |
| H            | -1.505955 | -2.409195 | 3.206784  | C | -4.410580 | 2.019216  | -0.236761 |
| H            | -0.050912 | -1.514516 | 2.815066  | H | -2.808135 | 1.691388  | 1.149690  |
| C            | -1.660825 | 0.251693  | 4.218005  | C | -4.766545 | 2.300561  | -1.558489 |
| H            | -1.465509 | 0.447683  | 2.089310  | H | -4.036292 | 2.718378  | -3.546195 |
| H            | -2.912705 | -0.428479 | 2.578115  | H | -5.179468 | 1.875575  | 0.516996  |
| H            | -2.011323 | -0.489329 | 4.949324  | H | -5.813902 | 2.381895  | -1.835516 |
| H            | -0.587311 | 0.395057  | 4.407195  | C | 0.649621  | 2.962576  | -1.469356 |
| C            | -2.400004 | 1.577290  | 4.424686  | C | 0.954978  | 2.555313  | -2.779686 |
| H            | -2.256256 | 1.962041  | 5.440041  | C | 1.063656  | 4.228277  | -1.031850 |
| H            | -2.038133 | 2.340504  | 3.725480  | C | 1.639561  | 3.409349  | -3.643205 |
| H            | -3.478229 | 1.454510  | 4.264524  | H | 0.668552  | 1.562988  | -3.118908 |
|              |           |           |           | C | 1.760871  | 5.075029  | -1.896446 |
| <b>INT6C</b> |           |           |           | H | 0.855616  | 4.556511  | -0.019226 |
| C            | -0.659511 | 4.061008  | 3.035564  | C | 2.045075  | 4.671655  | -3.201939 |
| C            | -0.805619 | 3.592332  | 1.730529  | H | 1.866553  | 3.084559  | -4.654586 |
| C            | -0.142798 | 2.420635  | 1.320600  | H | 2.082028  | 6.051491  | -1.545394 |
| C            | 0.657376  | 1.725774  | 2.239380  | H | 2.586815  | 5.333887  | -3.870959 |
| C            | 0.800228  | 2.200531  | 3.544479  | P | -0.293023 | 1.806185  | -0.397922 |
| C            | 0.144679  | 3.365738  | 3.943868  | C | 7.070519  | -1.995402 | -1.811112 |
| H            | -1.175785 | 4.965513  | 3.343673  | C | 5.948444  | -2.831870 | -1.892480 |
| H            | -1.441887 | 4.131455  | 1.034798  | C | 4.759768  | -2.347592 | -1.368196 |
| H            | 1.167076  | 0.816771  | 1.939778  | C | 4.646613  | -1.085361 | -0.765624 |
| H            | 1.421068  | 1.648943  | 4.242646  | C | 5.764069  | -0.265545 | -0.704448 |
| H            | 0.251749  | 3.729373  | 4.961770  | C | 6.978890  | -0.728014 | -1.232574 |
| C            | -2.057365 | 2.107270  | -0.837384 | H | 8.019455  | -2.339705 | -2.210764 |
| C            | -2.422193 | 2.394928  | -2.161050 | H | 6.012078  | -3.813390 | -2.351231 |



|    |           |           |           |             |           |           |           |
|----|-----------|-----------|-----------|-------------|-----------|-----------|-----------|
| H  | 5.705933  | 0.725677  | -0.266417 | O           | -3.053546 | -2.816613 | 0.388437  |
| H  | 7.856865  | -0.090672 | -1.191866 | C           | -5.041040 | -2.194460 | -0.758595 |
| N  | 3.485789  | -2.981074 | -1.385152 | C           | -5.754603 | -3.246746 | -0.149767 |
| C  | 2.560070  | -2.162111 | -0.855787 | C           | -5.711414 | -1.303954 | -1.621790 |
| O  | 1.318320  | -2.350603 | -0.881334 | C           | -7.111501 | -3.405503 | -0.406409 |
| C  | 3.211949  | -0.913273 | -0.273755 | H           | -5.235182 | -3.928021 | 0.515265  |
| C  | 2.389358  | 0.282688  | -0.825875 | C           | -7.069425 | -1.469124 | -1.870406 |
| H  | 2.688261  | 1.211627  | -0.332435 | H           | -5.175873 | -0.480457 | -2.080894 |
| H  | 2.576096  | 0.403671  | -1.900488 | C           | -7.769610 | -2.518612 | -1.266004 |
| C  | 3.154789  | -0.940286 | 1.266914  | H           | -7.659154 | -4.218058 | 0.060792  |
| C  | 2.506159  | -1.950560 | 1.987977  | H           | -7.584941 | -0.782063 | -2.534431 |
| C  | 3.758505  | 0.104312  | 1.982353  | H           | -8.830030 | -2.645276 | -1.464122 |
| C  | 2.448825  | -1.910803 | 3.384741  | C           | -1.634024 | -2.399723 | 0.497017  |
| H  | 2.027499  | -2.772787 | 1.467355  | C           | -1.312036 | -2.145814 | 1.974056  |
| C  | 3.713437  | 0.140074  | 3.375160  | H           | -1.054101 | -3.253044 | 0.122967  |
| H  | 4.259825  | 0.905178  | 1.449256  | C           | -1.999503 | -0.908104 | 2.554920  |
| C  | 3.051733  | -0.866192 | 4.084746  | H           | -1.580240 | -3.043780 | 2.543650  |
| H  | 1.937020  | -2.704614 | 3.921740  | H           | -0.225338 | -2.028962 | 2.042468  |
| H  | 4.193539  | 0.957579  | 3.905686  | C           | -1.636000 | -0.655559 | 4.021388  |
| H  | 3.015773  | -0.840024 | 5.170043  | H           | -1.699739 | -0.033082 | 1.967211  |
| C  | 3.199723  | -4.235126 | -2.062524 | H           | -3.089376 | -1.004058 | 2.452262  |
| H  | 3.481337  | -4.163565 | -3.118234 | H           | -1.902401 | -1.534048 | 4.625274  |
| H  | 3.762563  | -5.048616 | -1.594761 | H           | -0.546061 | -0.540084 | 4.101200  |
| H  | 2.130318  | -4.431874 | -1.981489 | C           | -2.328842 | 0.590700  | 4.580560  |
| Pd | 0.370730  | -0.343066 | -0.627473 | H           | -2.046166 | 0.772012  | 5.623216  |
| C  | -1.484528 | -1.238855 | -0.430378 | H           | -2.055713 | 1.481859  | 4.003641  |
| C  | -2.720715 | -1.069877 | -1.018984 | H           | -3.420042 | 0.484073  | 4.544642  |
| H  | -2.984967 | -0.317990 | -1.748517 |             |           |           |           |
| C  | -3.627740 | -2.015847 | -0.488068 | <b>TS6D</b> |           |           |           |

|   |           |           |           |    |           |           |           |
|---|-----------|-----------|-----------|----|-----------|-----------|-----------|
| C | -4.092911 | -3.685565 | 1.893030  | C  | 1.701760  | -5.038754 | -2.206712 |
| C | -2.738872 | -3.345768 | 1.890034  | H  | 3.524764  | -4.232943 | -1.373999 |
| C | -2.198390 | -2.627649 | 0.812726  | H  | -0.269147 | -5.668448 | -2.814178 |
| C | -3.031070 | -2.248644 | -0.253605 | H  | 2.213855  | -5.679165 | -2.918754 |
| C | -4.378820 | -2.605963 | -0.251878 | P  | -0.424920 | -2.177337 | 0.746036  |
| C | -4.912925 | -3.321937 | 0.822749  | Pd | -0.086500 | 0.082084  | 0.216437  |
| H | -4.504684 | -4.240251 | 2.731148  | C  | -2.078786 | 6.695590  | 1.136830  |
| H | -2.108279 | -3.640027 | 2.722597  | C  | -2.296147 | 5.612869  | 1.999669  |
| H | -2.627795 | -1.679965 | -1.084377 | C  | -1.956776 | 4.352605  | 1.530817  |
| H | -5.010538 | -2.324403 | -1.089535 | C  | -1.425843 | 4.135283  | 0.251515  |
| H | -5.964237 | -3.594860 | 0.825988  | C  | -1.211135 | 5.217704  | -0.590203 |
| C | 0.253476  | -2.555381 | 2.404878  | C  | -1.539841 | 6.503443  | -0.137474 |
| C | 0.726767  | -3.840514 | 2.717931  | H  | -2.332203 | 7.697418  | 1.469361  |
| C | 0.254583  | -1.557888 | 3.394536  | H  | -2.709474 | 5.759772  | 2.992112  |
| C | 1.199615  | -4.119428 | 4.000581  | H  | -0.794428 | 5.082806  | -1.583060 |
| H | 0.729820  | -4.620492 | 1.963215  | H  | -1.374081 | 7.357595  | -0.786307 |
| C | 0.727859  | -1.845422 | 4.675290  | N  | -2.048333 | 3.117312  | 2.223911  |
| H | -0.121955 | -0.564950 | 3.170697  | C  | -1.561884 | 2.117679  | 1.466263  |
| C | 1.203008  | -3.123048 | 4.979602  | O  | -1.378249 | 0.940122  | 1.844652  |
| H | 1.565623  | -5.115170 | 4.233319  | C  | -1.207297 | 2.634408  | 0.066696  |
| H | 0.728531  | -1.069113 | 5.435225  | C  | 0.308024  | 2.320416  | -0.217324 |
| H | 1.574960  | -3.342285 | 5.976266  | H  | 0.553235  | 2.774983  | -1.176022 |
| C | 0.376321  | -3.378732 | -0.378157 | H  | 0.911143  | 2.786226  | 0.562392  |
| C | 1.782046  | -3.399871 | -0.430751 | C  | -2.161950 | 2.067290  | -1.001041 |
| C | -0.357537 | -4.204809 | -1.240316 | C  | -3.242552 | 1.236039  | -0.676558 |
| C | 2.439422  | -4.226580 | -1.340047 | C  | -1.986201 | 2.442455  | -2.341765 |
| H | 2.362819  | -2.778762 | 0.247144  | C  | -4.121504 | 0.792344  | -1.668478 |
| C | 0.307106  | -5.029970 | -2.150783 | H  | -3.400607 | 0.907840  | 0.344908  |
| H | -1.441936 | -4.206861 | -1.206257 | C  | -2.860809 | 1.997428  | -3.330640 |

|   |           |           |           |              |           |           |           |
|---|-----------|-----------|-----------|--------------|-----------|-----------|-----------|
| H | -1.165156 | 3.093347  | -2.624272 | H            | 0.221392  | 1.067544  | -2.935814 |
| C | -3.935644 | 1.168651  | -2.997571 | H            | 1.346121  | -0.149686 | -3.534057 |
| H | -4.951570 | 0.150472  | -1.390087 | C            | -1.080816 | -0.901788 | -4.565355 |
| H | -2.705308 | 2.302645  | -4.361052 | H            | -0.383965 | -1.929428 | -2.797167 |
| H | -4.620262 | 0.825903  | -3.767368 | H            | -1.487800 | -0.592084 | -2.472473 |
| C | -2.472061 | 2.975131  | 3.608602  | H            | -1.295531 | 0.129431  | -4.876695 |
| H | -1.820337 | 3.562894  | 4.263085  | H            | -0.250829 | -1.249843 | -5.195081 |
| H | -3.503022 | 3.324338  | 3.718080  | C            | -2.315439 | -1.778098 | -4.797090 |
| H | -2.410440 | 1.920556  | 3.878438  | H            | -2.618266 | -1.779785 | -5.849639 |
| C | 1.658477  | 0.881703  | -0.650183 | H            | -2.120444 | -2.816910 | -4.502732 |
| C | 2.868741  | 1.319366  | -0.271121 | H            | -3.164120 | -1.416904 | -4.202519 |
| H | 2.984943  | 2.048219  | 0.521438  |              |           |           |           |
| C | 4.069464  | 0.803525  | -0.993779 | <b>INT6D</b> |           |           |           |
| O | 3.942039  | 0.069881  | -1.973637 | C            | 4.429254  | -3.604441 | 0.501947  |
| C | 5.423688  | 1.202047  | -0.506234 | C            | 3.883138  | -2.424528 | 1.003277  |
| C | 6.516552  | 0.952807  | -1.355346 | C            | 2.737991  | -1.867874 | 0.406930  |
| C | 5.654943  | 1.786706  | 0.750496  | C            | 2.125870  | -2.527866 | -0.664914 |
| C | 7.806570  | 1.296081  | -0.964532 | C            | 2.682300  | -3.705110 | -1.169260 |
| H | 6.326924  | 0.492214  | -2.319026 | C            | 3.836127  | -4.238863 | -0.594296 |
| C | 6.950200  | 2.119655  | 1.145072  | H            | 5.315477  | -4.028601 | 0.964843  |
| H | 4.836256  | 1.963765  | 1.440801  | H            | 4.345403  | -1.933083 | 1.854888  |
| C | 8.026145  | 1.881100  | 0.287081  | H            | 1.206779  | -2.138770 | -1.090494 |
| H | 8.642662  | 1.108682  | -1.631990 | H            | 2.204704  | -4.207117 | -2.004212 |
| H | 7.120012  | 2.563508  | 2.121706  | H            | 4.266921  | -5.154725 | -0.988761 |
| H | 9.033701  | 2.147857  | 0.593432  | C            | 2.111502  | -0.382984 | 2.820285  |
| C | 1.170940  | -0.178428 | -1.449729 | C            | 3.153170  | 0.140779  | 3.601186  |
| C | 0.537847  | 0.027911  | -2.809698 | C            | 1.038671  | -1.043655 | 3.445999  |
| H | 1.728584  | -1.108063 | -1.358223 | C            | 3.124721  | -0.005369 | 4.989208  |
| C | -0.643032 | -0.906771 | -3.098495 | H            | 3.981123  | 0.660505  | 3.129108  |

|   |           |           |           |   |           |           |           |
|---|-----------|-----------|-----------|---|-----------|-----------|-----------|
| C | 1.018082  | -1.186684 | 4.832720  | C | -2.958575 | -0.537029 | 0.909485  |
| H | 0.220003  | -1.440854 | 2.850140  | O | -1.996162 | -0.243844 | 1.635477  |
| C | 2.060567  | -0.667863 | 5.605559  | C | -2.938414 | -0.830107 | -0.617992 |
| H | 3.935423  | 0.398763  | 5.588607  | C | -1.994646 | -1.986659 | -0.964581 |
| H | 0.187052  | -1.697992 | 5.310094  | C | -1.627618 | -2.927339 | 0.010528  |
| H | 2.042056  | -0.776923 | 6.686060  | C | -1.622159 | -2.233838 | -2.294818 |
| C | 3.362978  | 0.989744  | 0.576173  | C | -0.942525 | -4.091431 | -0.337279 |
| C | 3.069792  | 2.330750  | 0.882042  | H | -1.885495 | -2.761247 | 1.051160  |
| C | 4.583790  | 0.675376  | -0.035049 | C | -0.934911 | -3.398755 | -2.644781 |
| C | 3.990756  | 3.336230  | 0.597126  | H | -1.893532 | -1.538288 | -3.082602 |
| H | 2.118822  | 2.588698  | 1.342236  | C | -0.608156 | -4.340874 | -1.668959 |
| C | 5.501334  | 1.687754  | -0.321823 | H | -0.675370 | -4.806470 | 0.435099  |
| H | 4.817788  | -0.348864 | -0.301686 | H | -0.674716 | -3.573919 | -3.684904 |
| C | 5.210910  | 3.014762  | -0.003693 | H | -0.093117 | -5.257133 | -1.940782 |
| H | 3.752623  | 4.368454  | 0.836024  | C | -4.643330 | -0.419900 | 2.734066  |
| H | 6.441265  | 1.435480  | -0.803576 | H | -5.415578 | 0.354855  | 2.772963  |
| H | 5.927652  | 3.798566  | -0.231128 | H | -5.040194 | -1.343786 | 3.167426  |
| P | 2.091922  | -0.263289 | 0.988943  | H | -3.767903 | -0.096577 | 3.297493  |
| C | -7.114232 | -1.771926 | -0.750976 | C | -0.121553 | 0.964765  | -1.603149 |
| C | -6.470583 | -1.338799 | 0.416484  | H | -0.107265 | 0.054389  | -2.195840 |
| C | -5.109424 | -1.079330 | 0.330805  | C | 0.949144  | 1.966426  | -1.958209 |
| C | -4.388877 | -1.235173 | -0.857437 | O | 0.813286  | 3.161441  | -1.709891 |
| C | -5.033833 | -1.668632 | -2.005592 | C | 2.192772  | 1.460688  | -2.614009 |
| C | -6.409023 | -1.937234 | -1.945734 | C | 3.176674  | 2.407849  | -2.945102 |
| H | -8.178088 | -1.986395 | -0.720055 | C | 2.429934  | 0.105952  | -2.901381 |
| H | -7.017297 | -1.217431 | 1.345943  | C | 4.365370  | 2.010003  | -3.547497 |
| H | -4.483027 | -1.813035 | -2.930456 | H | 2.989478  | 3.449867  | -2.712310 |
| H | -6.928143 | -2.281408 | -2.834672 | C | 3.628379  | -0.293984 | -3.488970 |
| N | -4.238167 | -0.646622 | 1.356600  | H | 1.696881  | -0.652275 | -2.659052 |

|             |           |           |           |   |           |           |           |
|-------------|-----------|-----------|-----------|---|-----------|-----------|-----------|
| C           | 4.596674  | 0.657395  | -3.817424 | C | -0.769026 | 4.412685  | 0.179284  |
| H           | 5.117149  | 2.751729  | -3.800677 | C | -0.874534 | 5.804489  | 0.223170  |
| H           | 3.803719  | -1.347334 | -3.687235 | C | -2.128058 | 6.409291  | 0.332928  |
| H           | 5.528071  | 0.346648  | -4.282511 | H | -4.257092 | 6.091646  | 0.488704  |
| C           | -2.705130 | 2.787674  | 0.622145  | H | -4.084488 | 3.626709  | 0.404758  |
| C           | -3.340473 | 4.030427  | -0.048640 | H | 0.210824  | 3.948655  | 0.104615  |
| H           | -3.457530 | 1.999660  | 0.710806  | H | 0.023439  | 6.414171  | 0.179099  |
| H           | -2.396810 | 3.050282  | 1.642062  | H | -2.207524 | 7.491879  | 0.372769  |
| C           | -4.551907 | 4.556038  | 0.732558  | C | -3.135336 | 1.096895  | 1.085854  |
| H           | -2.585034 | 4.821628  | -0.142024 | C | -4.402028 | 0.832417  | 0.543130  |
| H           | -3.643485 | 3.770750  | -1.072408 | C | -2.902722 | 0.833834  | 2.446989  |
| H           | -5.296067 | 3.752344  | 0.829298  | C | -5.414349 | 0.306997  | 1.349120  |
| H           | -4.238464 | 4.812274  | 1.754063  | H | -4.597508 | 1.029850  | -0.506386 |
| C           | -5.192769 | 5.776397  | 0.064591  | C | -3.918442 | 0.315036  | 3.250385  |
| H           | -6.053024 | 6.135063  | 0.639574  | H | -1.922624 | 1.038681  | 2.872545  |
| H           | -4.476471 | 6.602287  | -0.017651 | C | -5.174699 | 0.046424  | 2.700168  |
| H           | -5.541940 | 5.535619  | -0.946623 | H | -6.391352 | 0.103700  | 0.920174  |
| C           | -1.436965 | 1.322469  | -1.081912 | H | -3.728773 | 0.118247  | 4.301800  |
| C           | -2.673219 | 0.500481  | -1.417376 | H | -5.964454 | -0.363776 | 3.322795  |
| H           | -2.653520 | 0.247343  | -2.480132 | C | -2.107966 | 1.399635  | -1.648258 |
| H           | -3.556285 | 1.130536  | -1.287854 | C | -2.448937 | 0.083864  | -2.008027 |
| C           | -1.499031 | 2.349518  | -0.145431 | C | -1.887325 | 2.348648  | -2.657941 |
| H           | -0.645349 | 3.019460  | -0.091469 | C | -2.561331 | -0.275387 | -3.350853 |
| Pd          | -0.023883 | 0.489143  | 0.439679  | H | -2.633634 | -0.659721 | -1.240614 |
|             |           |           |           | C | -2.004211 | 1.985289  | -4.001331 |
| <b>TS7C</b> |           |           |           | H | -1.629148 | 3.370699  | -2.397936 |
| C           | -3.281689 | 5.622394  | 0.398000  | C | -2.334482 | 0.673697  | -4.351014 |
| C           | -3.184915 | 4.232471  | 0.348572  | H | -2.824379 | -1.297036 | -3.610898 |
| C           | -1.926861 | 3.619653  | 0.236531  | H | -1.842600 | 2.731401  | -4.774407 |

|   |           |           |           |   |           |           |           |
|---|-----------|-----------|-----------|---|-----------|-----------|-----------|
| H | -2.424447 | 0.395551  | -5.397259 | H | 5.589523  | 3.659397  | -0.114332 |
| P | -1.755447 | 1.801262  | 0.108445  | H | 3.971664  | 4.037409  | 0.542308  |
| C | 7.189184  | -0.411432 | 0.893105  | C | -0.097954 | -1.695672 | -0.670440 |
| C | 6.590098  | 0.846923  | 0.742540  | H | 0.217637  | -1.357887 | -1.643194 |
| C | 5.227426  | 0.876247  | 0.483620  | C | -0.815202 | -2.848587 | -0.422463 |
| C | 4.456074  | -0.286927 | 0.349794  | O | -1.095716 | -3.021581 | 0.878845  |
| C | 5.057551  | -1.524171 | 0.536039  | C | -1.320786 | -3.836523 | -1.363273 |
| C | 6.433436  | -1.581636 | 0.804825  | C | -2.103948 | -4.913947 | -0.910572 |
| H | 8.253692  | -0.470833 | 1.097947  | C | -1.044337 | -3.707341 | -2.739580 |
| H | 7.169684  | 1.758963  | 0.840030  | C | -2.602685 | -5.843579 | -1.818984 |
| H | 4.477335  | -2.441597 | 0.493797  | H | -2.316602 | -5.009706 | 0.148605  |
| H | 6.911250  | -2.545343 | 0.950194  | C | -1.548625 | -4.639808 | -3.640062 |
| N | 4.391943  | 2.014388  | 0.385832  | H | -0.433915 | -2.885099 | -3.099483 |
| C | 3.094009  | 1.643978  | 0.277719  | C | -2.328215 | -5.708293 | -3.182918 |
| O | 2.123042  | 2.412991  | 0.397478  | H | -3.206777 | -6.673389 | -1.464876 |
| C | 3.020833  | 0.116108  | 0.024899  | H | -1.332397 | -4.538418 | -4.699462 |
| C | 2.652039  | -0.168577 | -1.455683 | H | -2.719284 | -6.434599 | -3.889462 |
| C | 1.892470  | 0.733752  | -2.216254 | C | 0.080940  | -2.236430 | 2.872161  |
| C | 2.967137  | -1.411347 | -2.019749 | C | -0.837668 | -2.987579 | 3.843040  |
| C | 1.423729  | 0.382332  | -3.484129 | H | 0.953568  | -2.851858 | 2.619917  |
| H | 1.632481  | 1.708394  | -1.820046 | H | 0.455239  | -1.320079 | 3.345721  |
| C | 2.507490  | -1.761023 | -3.290863 | C | -0.133373 | -3.366979 | 5.150884  |
| H | 3.568329  | -2.124134 | -1.468980 | H | -1.714178 | -2.360573 | 4.065345  |
| C | 1.721290  | -0.869976 | -4.024510 | H | -1.220332 | -3.891452 | 3.352463  |
| H | 0.809759  | 1.086554  | -4.036528 | H | 0.742338  | -3.990615 | 4.922253  |
| H | 2.763293  | -2.733313 | -3.702367 | H | 0.254510  | -2.457105 | 5.631039  |
| H | 1.355334  | -1.142638 | -5.010305 | C | -1.055213 | -4.110244 | 6.122545  |
| C | 4.835632  | 3.378113  | 0.626865  | H | -0.530120 | -4.373084 | 7.046852  |
| H | 5.266124  | 3.464541  | 1.630353  | H | -1.921960 | -3.495014 | 6.393535  |

|              |           |           |           |   |           |           |           |
|--------------|-----------|-----------|-----------|---|-----------|-----------|-----------|
| H            | -1.432679 | -5.038100 | 5.676148  | H | 6.762535  | -0.168640 | -0.588670 |
| C            | 1.985412  | -0.548384 | 0.979590  | H | 4.632231  | 2.971732  | 1.439286  |
| H            | 2.144302  | -1.626188 | 0.943298  | H | 6.722612  | 2.110994  | 0.402654  |
| H            | 2.141193  | -0.242921 | 2.019677  | C | 2.204891  | -2.444948 | -0.632606 |
| C            | -0.633013 | -1.826923 | 1.591363  | C | 2.459518  | -2.104985 | -1.971702 |
| H            | -1.552586 | -1.282749 | 1.846944  | C | 2.072781  | -3.797349 | -0.288036 |
| Pd           | 0.300582  | 0.926949  | 0.645750  | C | 2.604962  | -3.096080 | -2.940297 |
| C            | 0.096522  | -1.000369 | 0.547164  | H | 2.569631  | -1.061406 | -2.251383 |
|              |           |           |           | C | 2.204345  | -4.789619 | -1.263931 |
| <b>INT7C</b> |           |           |           | H | 1.880879  | -4.079709 | 0.742252  |
| C            | 3.509696  | -3.041324 | 3.924292  | C | 2.476232  | -4.443352 | -2.589028 |
| C            | 3.413528  | -2.346394 | 2.719369  | H | 2.817030  | -2.818336 | -3.969069 |
| C            | 2.157172  | -1.962429 | 2.222831  | H | 2.106717  | -5.834455 | -0.982779 |
| C            | 1.001221  | -2.283899 | 2.951567  | H | 2.589883  | -5.216945 | -3.343033 |
| C            | 1.103885  | -2.984206 | 4.156028  | P | 1.985336  | -1.100120 | 0.607332  |
| C            | 2.355369  | -3.362760 | 4.644110  | C | -7.219056 | -1.785412 | -0.157475 |
| H            | 4.486046  | -3.330779 | 4.302485  | C | -6.272936 | -2.007833 | 0.852428  |
| H            | 4.316194  | -2.097961 | 2.169623  | C | -4.984667 | -1.543661 | 0.626402  |
| H            | 0.024971  | -1.987546 | 2.582848  | C | -4.617306 | -0.879224 | -0.548924 |
| H            | 0.204939  | -3.227690 | 4.715998  | C | -5.560827 | -0.670333 | -1.543525 |
| H            | 2.433765  | -3.902884 | 5.583379  | C | -6.871144 | -1.126383 | -1.339110 |
| C            | 3.524459  | -0.105445 | 0.475328  | H | -8.236897 | -2.135626 | -0.015847 |
| C            | 4.707653  | -0.586294 | -0.106414 | H | -6.541311 | -2.522934 | 1.768959  |
| C            | 3.510338  | 1.184167  | 1.029320  | H | -5.291744 | -0.174060 | -2.470921 |
| C            | 5.852172  | 0.212691  | -0.134566 | H | -7.620094 | -0.969309 | -2.108921 |
| H            | 4.738248  | -1.581164 | -0.539143 | N | -3.862391 | -1.639584 | 1.483627  |
| C            | 4.658226  | 1.974234  | 1.011491  | C | -2.771105 | -1.063493 | 0.925380  |
| H            | 2.593217  | 1.572084  | 1.466039  | O | -1.666251 | -0.969790 | 1.489229  |
| C            | 5.830301  | 1.491845  | 0.424696  | C | -3.141718 | -0.511475 | -0.468405 |

|   |           |           |           |             |           |           |           |
|---|-----------|-----------|-----------|-------------|-----------|-----------|-----------|
| C | -2.331767 | -1.165838 | -1.591126 | H           | 5.277804  | 3.713978  | -2.709639 |
| C | -1.564628 | -2.318547 | -1.374185 | C           | -2.248914 | 3.955213  | 0.475245  |
| C | -2.382783 | -0.630409 | -2.886879 | C           | -1.890436 | 5.153516  | 1.362771  |
| C | -0.849676 | -2.907343 | -2.418182 | H           | -2.226635 | 4.242206  | -0.584806 |
| H | -1.500629 | -2.757647 | -0.383982 | H           | -3.272274 | 3.626550  | 0.696825  |
| C | -1.669548 | -1.218831 | -3.931956 | C           | -2.849551 | 6.335773  | 1.175401  |
| H | -2.976970 | 0.255442  | -3.091101 | H           | -1.897370 | 4.839610  | 2.416907  |
| C | -0.894705 | -2.357432 | -3.698447 | H           | -0.864515 | 5.473285  | 1.141131  |
| H | -0.241822 | -3.783375 | -2.220428 | H           | -2.847854 | 6.638566  | 0.118884  |
| H | -1.725297 | -0.789101 | -4.928339 | H           | -3.875175 | 6.010603  | 1.400076  |
| H | -0.331095 | -2.813136 | -4.506958 | C           | -2.483708 | 7.534949  | 2.055729  |
| C | -3.890691 | -2.241023 | 2.806862  | H           | -3.181363 | 8.365463  | 1.905169  |
| H | -4.608887 | -1.714441 | 3.443696  | H           | -2.507003 | 7.266433  | 3.118802  |
| H | -4.181530 | -3.293590 | 2.732091  | H           | -1.474951 | 7.899241  | 1.826489  |
| H | -2.893061 | -2.164528 | 3.239640  | C           | -2.963141 | 1.041901  | -0.413045 |
| C | -0.500438 | 1.596771  | -1.212043 | H           | -3.418176 | 1.464282  | -1.316124 |
| H | -0.474514 | 1.119167  | -2.181954 | H           | -3.575153 | 1.402143  | 0.420694  |
| C | 0.487944  | 2.483073  | -0.716944 | C           | -1.307335 | 2.763036  | 0.670229  |
| O | 0.050737  | 3.197373  | 0.330321  | H           | -1.271808 | 2.475654  | 1.728275  |
| C | 1.786102  | 2.826780  | -1.269927 | Pd          | -0.013220 | 0.131586  | 0.311046  |
| C | 2.433300  | 4.009071  | -0.870626 | C           | -1.550876 | 1.570407  | -0.252506 |
| C | 2.406969  | 1.971681  | -2.198698 |             |           |           |           |
| C | 3.680854  | 4.328937  | -1.398658 | <b>TS8C</b> |           |           |           |
| H | 1.951079  | 4.666533  | -0.155632 | C           | 5.201529  | -2.169704 | 1.813361  |
| C | 3.657506  | 2.290689  | -2.711494 | C           | 4.461708  | -1.708148 | 0.721245  |
| H | 1.917375  | 1.046511  | -2.485177 | C           | 3.070027  | -1.873049 | 0.694769  |
| C | 4.297622  | 3.469375  | -2.311328 | C           | 2.431621  | -2.507172 | 1.774252  |
| H | 4.176311  | 5.245564  | -1.093328 | C           | 3.173509  | -2.974009 | 2.858300  |
| H | 4.143073  | 1.617763  | -3.411322 | C           | 4.561370  | -2.802460 | 2.880458  |



|   |           |           |           |   |           |           |           |
|---|-----------|-----------|-----------|---|-----------|-----------|-----------|
| H | 6.278984  | -2.032925 | 1.828396  | C | -5.754475 | -2.961806 | 0.403628  |
| H | 4.967776  | -1.213970 | -0.102533 | C | -4.704333 | -2.081440 | 0.186706  |
| H | 1.350231  | -2.625960 | 1.766107  | C | -4.667080 | -0.792766 | 0.732660  |
| H | 2.670596  | -3.461122 | 3.688910  | C | -5.707853 | -0.370701 | 1.548112  |
| H | 5.139321  | -3.158635 | 3.728334  | C | -6.778755 | -1.243592 | 1.790549  |
| C | 3.066512  | -0.073595 | -1.613776 | H | -7.642206 | -3.179222 | 1.412833  |
| C | 3.942805  | -0.483889 | -2.630344 | H | -5.765443 | -3.954771 | -0.033583 |
| C | 2.987808  | 1.289393  | -1.280687 | H | -5.705019 | 0.616523  | 1.998817  |
| C | 4.730404  | 0.457652  | -3.295678 | H | -7.596910 | -0.922378 | 2.427404  |
| H | 4.005306  | -1.532720 | -2.905809 | N | -3.520035 | -2.313039 | -0.552081 |
| C | 3.776557  | 2.226680  | -1.946537 | C | -2.692538 | -1.247330 | -0.492796 |
| H | 2.302869  | 1.622915  | -0.506347 | O | -1.553681 | -1.237749 | -0.999683 |
| C | 4.648607  | 1.810573  | -2.955943 | C | -3.397105 | -0.092253 | 0.257048  |
| H | 5.404666  | 0.133700  | -4.083356 | C | -3.731007 | 1.052971  | -0.719875 |
| H | 3.696572  | 3.277240  | -1.681085 | C | -3.342395 | 1.037151  | -2.064870 |
| H | 5.259402  | 2.538974  | -3.481742 | C | -4.411269 | 2.180260  | -0.233589 |
| C | 1.809308  | -2.706931 | -1.798526 | C | -3.607383 | 2.130444  | -2.895599 |
| C | 0.771607  | -2.660919 | -2.744737 | H | -2.800742 | 0.192404  | -2.473475 |
| C | 2.644051  | -3.832798 | -1.740703 | C | -4.672384 | 3.271510  | -1.059421 |
| C | 0.581522  | -3.724309 | -3.626866 | H | -4.724262 | 2.224262  | 0.804231  |
| H | 0.109926  | -1.801216 | -2.780436 | C | -4.265241 | 3.253934  | -2.396521 |
| C | 2.445125  | -4.896875 | -2.623231 | H | -3.291804 | 2.098592  | -3.934518 |
| H | 3.445165  | -3.880528 | -1.009071 | H | -5.192127 | 4.136350  | -0.657452 |
| C | 1.416845  | -4.843749 | -3.566511 | H | -4.466502 | 4.104238  | -3.041355 |
| H | -0.218406 | -3.680418 | -4.361036 | C | -3.186671 | -3.572340 | -1.200955 |
| H | 3.095243  | -5.765679 | -2.573477 | H | -3.195270 | -4.383099 | -0.465424 |
| H | 1.265529  | -5.672789 | -4.251951 | H | -3.917906 | -3.791152 | -1.985261 |
| P | 2.024820  | -1.267224 | -0.688386 | H | -2.191015 | -3.482839 | -1.636836 |
| C | -6.803304 | -2.517728 | 1.219863  | C | -1.092779 | 2.308555  | 0.288780  |

|   |           |           |           |              |           |           |           |
|---|-----------|-----------|-----------|--------------|-----------|-----------|-----------|
| H | -1.712546 | 2.571619  | -0.551337 | H            | -2.316562 | -0.452395 | 2.101119  |
| C | 0.021533  | 2.995425  | 0.696726  | C            | -0.092753 | 1.205756  | 2.029286  |
| O | 0.557580  | 2.414821  | 1.816599  | H            | 0.895747  | 0.378420  | 1.358226  |
| C | 0.745189  | 4.115581  | 0.114038  | Pd           | 0.091547  | -0.242109 | 0.101650  |
| C | 1.975922  | 4.529412  | 0.654860  | C            | -1.250036 | 1.148157  | 1.135483  |
| C | 0.243756  | 4.762721  | -1.031124 |              |           |           |           |
| C | 2.690296  | 5.566037  | 0.056815  | <b>INT8C</b> |           |           |           |
| H | 2.368782  | 4.031122  | 1.534523  | C            | -4.682966 | -3.171668 | 1.531912  |
| C | 0.962177  | 5.797403  | -1.621266 | C            | -4.143562 | -1.905875 | 1.286678  |
| H | -0.705235 | 4.453869  | -1.459643 | C            | -3.047454 | -1.758557 | 0.425337  |
| C | 2.188296  | 6.201409  | -1.082083 | C            | -2.504377 | -2.899128 | -0.188418 |
| H | 3.639671  | 5.878477  | 0.481832  | C            | -3.053289 | -4.158344 | 0.046975  |
| H | 0.567546  | 6.290183  | -2.504835 | C            | -4.142977 | -4.298445 | 0.911643  |
| H | 2.746829  | 7.008851  | -1.546314 | H            | -5.527406 | -3.272634 | 2.208491  |
| C | 0.022323  | 0.671758  | 3.436288  | H            | -4.577208 | -1.036355 | 1.769507  |
| C | 1.476356  | 0.534500  | 3.911185  | H            | -1.646673 | -2.797893 | -0.847376 |
| H | -0.541118 | 1.338139  | 4.103843  | H            | -2.624629 | -5.031493 | -0.437658 |
| H | -0.472666 | -0.305797 | 3.462263  | H            | -4.564659 | -5.281624 | 1.102752  |
| C | 1.596296  | -0.137679 | 5.282692  | C            | -3.078010 | 0.297733  | -1.610074 |
| H | 2.036647  | -0.058106 | 3.174380  | C            | -4.135484 | -0.443822 | -2.157513 |
| H | 1.942959  | 1.526976  | 3.936601  | C            | -2.576481 | 1.409693  | -2.308810 |
| H | 1.029228  | 0.436710  | 6.028057  | C            | -4.683518 | -0.079084 | -3.389620 |
| H | 1.127829  | -1.131719 | 5.236377  | H            | -4.531964 | -1.304638 | -1.628404 |
| C | 3.054421  | -0.277617 | 5.731703  | C            | -3.133361 | 1.769603  | -3.535765 |
| H | 3.124826  | -0.771281 | 6.706740  | H            | -1.760853 | 1.989555  | -1.885253 |
| H | 3.629241  | -0.869078 | 5.008943  | C            | -4.184119 | 1.026234  | -4.080352 |
| H | 3.535477  | 0.703952  | 5.817840  | H            | -5.501158 | -0.660867 | -3.807092 |
| C | -2.537072 | 0.407589  | 1.459774  | H            | -2.741426 | 2.632198  | -4.068042 |
| H | -3.173344 | 1.072272  | 2.058611  | H            | -4.611427 | 1.307131  | -5.039442 |

|    |           |           |           |              |          |           |           |
|----|-----------|-----------|-----------|--------------|----------|-----------|-----------|
| C  | -3.121359 | 1.043261  | 1.197991  | C            | 4.681932 | -3.171802 | -1.533252 |
| C  | -4.397758 | 1.575726  | 0.965716  | H            | 4.576102 | -1.036490 | -1.770945 |
| C  | -2.435800 | 1.378509  | 2.374263  | C            | 3.053293 | -4.158255 | -0.047026 |
| C  | -4.984721 | 2.423536  | 1.906490  | H            | 1.647386 | -2.797663 | 0.848218  |
| H  | -4.928523 | 1.334203  | 0.049292  | C            | 4.142346 | -4.298489 | -0.912486 |
| C  | -3.028303 | 2.220685  | 3.314511  | H            | 5.525874 | -3.272864 | -2.210438 |
| H  | -1.431539 | 0.999264  | 2.537598  | H            | 2.624960 | -5.031345 | 0.438003  |
| C  | -4.302335 | 2.744254  | 3.082254  | H            | 4.563837 | -5.281709 | -1.103803 |
| H  | -5.971916 | 2.836817  | 1.717655  | C            | 3.078089 | 0.297400  | 1.610113  |
| H  | -2.487390 | 2.481477  | 4.219965  | C            | 4.136147 | -0.443828 | 2.156880  |
| H  | -4.758665 | 3.408696  | 3.811233  | C            | 2.576138 | 1.408725  | 2.309541  |
| P  | -2.324888 | -0.112933 | 0.018838  | C            | 4.684344 | -0.079388 | 3.389000  |
| Cl | -0.000010 | 2.482322  | 0.000400  | H            | 4.532931 | -1.304192 | 1.627262  |
| Pd | 0.000000  | 0.030872  | -0.000007 | C            | 3.133165 | 1.768331  | 3.536525  |
| H  | 0.000068  | -1.521178 | -0.000269 | H            | 1.760125 | 1.988389  | 1.886467  |
| C  | 4.985211  | 2.423219  | -1.906320 | C            | 4.184506 | 1.025299  | 4.080431  |
| C  | 4.398189  | 1.575226  | -0.965759 | H            | 5.502437 | -0.660910 | 3.805946  |
| C  | 3.121454  | 1.043463  | -1.197831 | H            | 2.740888 | 2.630434  | 4.069348  |
| C  | 2.435641  | 1.379587  | -2.373705 | H            | 4.611930 | 1.305965  | 5.039537  |
| C  | 3.028205  | 2.221953  | -3.313753 | P            | 2.324890 | -0.112883 | -0.018874 |
| C  | 4.302550  | 2.744832  | -3.081685 |              |          |           |           |
| H  | 5.972664  | 2.835953  | -1.717637 | <b>INT8D</b> |          |           |           |
| H  | 4.929168  | 1.332986  | -0.049649 | C            | 4.416324 | 3.471508  | 1.740937  |
| H  | 1.431158  | 1.000877  | -2.536899 | C            | 3.968653 | 2.187438  | 1.415632  |
| H  | 2.487090  | 2.483424  | -4.218890 | C            | 2.930532 | 2.013112  | 0.490641  |
| H  | 4.758931  | 3.409427  | -3.810492 | C            | 2.355593 | 3.145457  | -0.109671 |
| C  | 3.047296  | -1.758512 | -0.425619 | C            | 2.813337 | 4.423009  | 0.205555  |
| C  | 4.142762  | -1.905953 | -1.287738 | C            | 3.843348 | 4.590051  | 1.136732  |
| C  | 2.504608  | -2.899002 | 0.188645  | H            | 5.215957 | 3.592056  | 2.466916  |

|    |          |           |           |   |           |           |           |
|----|----------|-----------|-----------|---|-----------|-----------|-----------|
| H  | 4.429384 | 1.324988  | 1.885444  | C | -5.207119 | -2.078209 | -1.698122 |
| H  | 1.544582 | 3.024503  | -0.822484 | C | -4.528026 | -1.251045 | -0.801692 |
| H  | 2.360673 | 5.289186  | -0.269704 | C | -3.235608 | -0.799363 | -1.103140 |
| H  | 4.193295 | 5.587208  | 1.389960  | C | -2.629897 | -1.188599 | -2.306629 |
| C  | 3.075745 | 0.097998  | -1.665743 | C | -3.315112 | -2.006935 | -3.203579 |
| C  | 4.161092 | 0.871287  | -2.106306 | C | -4.603484 | -2.454142 | -2.899945 |
| C  | 2.565304 | -0.910925 | -2.498874 | H | -6.205451 | -2.431448 | -1.454359 |
| C  | 4.727682 | 0.637221  | -3.360775 | H | -5.001308 | -0.963252 | 0.132200  |
| H  | 4.563465 | 1.656398  | -1.473905 | H | -1.614609 | -0.871683 | -2.525941 |
| C  | 3.138321 | -1.141431 | -3.749774 | H | -2.835329 | -2.310332 | -4.129848 |
| H  | 1.731558 | -1.519710 | -2.162708 | H | -5.132093 | -3.101615 | -3.594455 |
| C  | 4.217853 | -0.368416 | -4.184264 | C | -2.930511 | 2.013126  | -0.490739 |
| H  | 5.567014 | 1.242571  | -3.692787 | C | -3.969263 | 2.187227  | -1.415068 |
| H  | 2.736796 | -1.926272 | -4.385029 | C | -2.355161 | 3.145623  | 0.108894  |
| H  | 4.658999 | -0.547749 | -5.161202 | C | -4.417140 | 3.471217  | -1.740401 |
| C  | 3.235780 | -0.799302 | 1.103318  | H | -4.430334 | 1.324671  | -1.884349 |
| C  | 4.528284 | -1.250823 | 0.801984  | C | -2.813101 | 4.423099  | -0.206353 |
| C  | 2.629980 | -1.188690 | 2.306705  | H | -1.543681 | 3.024833  | 0.821197  |
| C  | 5.207372 | -2.077953 | 1.698440  | C | -3.843740 | 4.589911  | -1.136877 |
| H  | 5.001656 | -0.962943 | -0.131837 | H | -5.217267 | 3.591585  | -2.465867 |
| C  | 3.315194 | -2.007003 | 3.203688  | H | -2.360105 | 5.289398  | 0.268366  |
| H  | 1.614638 | -0.871891 | 2.525934  | H | -4.193845 | 5.587006  | -1.390131 |
| C  | 4.603649 | -2.454035 | 2.900177  | C | -3.075728 | 0.098097  | 1.665789  |
| H  | 6.205776 | -2.431051 | 1.454765  | C | -4.160596 | 0.871860  | 2.106671  |
| H  | 2.835335 | -2.310505 | 4.129885  | C | -2.565799 | -0.911394 | 2.498566  |
| H  | 5.132249 | -3.101492 | 3.594709  | C | -4.727223 | 0.637713  | 3.361117  |
| P  | 2.321422 | 0.341269  | -0.003825 | H | -4.562608 | 1.657359  | 1.474526  |
| Pd | 0.000025 | 0.093735  | 0.000081  | C | -3.138863 | -1.141984 | 3.749419  |
| H  | 0.000122 | 1.645122  | 0.000350  | H | -1.732387 | -1.520509 | 2.162161  |

|             |           |           |           |    |           |           |           |
|-------------|-----------|-----------|-----------|----|-----------|-----------|-----------|
| C           | -4.217922 | -0.368482 | 4.184239  | H  | -6.482094 | -3.598987 | 0.877092  |
| H           | -5.566187 | 1.243437  | 3.693376  | C  | -2.575758 | 1.001785  | -1.410727 |
| H           | -2.737752 | -1.927265 | 4.384392  | C  | -3.927537 | 1.208504  | -1.722466 |
| H           | -4.659100 | -0.547880 | 5.161151  | C  | -1.595719 | 1.748626  | -2.086856 |
| P           | -2.321310 | 0.341351  | 0.003921  | C  | -4.291593 | 2.150335  | -2.687874 |
| I           | -0.000014 | -2.700814 | -0.000174 | H  | -4.696947 | 0.634089  | -1.215669 |
|             |           |           |           | C  | -1.964085 | 2.697708  | -3.039436 |
| <b>TS9C</b> |           |           |           | H  | -0.545458 | 1.592545  | -1.863194 |
| C           | -2.061922 | 2.967041  | 2.581362  | C  | -3.312682 | 2.899470  | -3.344164 |
| C           | -2.323816 | 2.183783  | 1.453511  | H  | -5.341958 | 2.297966  | -2.925404 |
| C           | -1.839070 | 0.871022  | 1.377034  | H  | -1.192870 | 3.273392  | -3.543739 |
| C           | -1.104045 | 0.352980  | 2.456411  | H  | -3.599393 | 3.632822  | -4.093389 |
| C           | -0.841646 | 1.134311  | 3.580357  | P  | -1.993030 | -0.186510 | -0.129073 |
| C           | -1.315176 | 2.448823  | 3.641633  | Cl | 0.122111  | -3.924949 | -1.441803 |
| H           | -2.435242 | 3.987121  | 2.625477  | Pd | 0.080093  | -1.301662 | -0.577073 |
| H           | -2.883263 | 2.604490  | 0.623615  | H  | 0.932060  | -2.705685 | -0.973236 |
| H           | -0.696893 | -0.651745 | 2.395374  | C  | 0.718023  | 3.733872  | -0.082071 |
| H           | -0.242429 | 0.725280  | 4.389051  | C  | 1.022738  | 2.435741  | 0.324615  |
| H           | -1.098450 | 3.066848  | 4.508912  | C  | 1.805512  | 1.597885  | -0.488230 |
| C           | -3.452650 | -1.243884 | 0.235054  | C  | 2.274106  | 2.090631  | -1.716314 |
| C           | -4.512403 | -0.828358 | 1.057137  | C  | 1.960750  | 3.389447  | -2.123203 |
| C           | -3.490357 | -2.523175 | -0.342016 | C  | 1.181086  | 4.214530  | -1.309268 |
| C           | -5.599134 | -1.673533 | 1.284461  | H  | 0.102548  | 4.359126  | 0.558385  |
| H           | -4.482474 | 0.152793  | 1.523373  | H  | 0.637050  | 2.070893  | 1.269401  |
| C           | -4.581714 | -3.364063 | -0.115621 | H  | 2.878601  | 1.458340  | -2.359955 |
| H           | -2.657758 | -2.865925 | -0.952311 | H  | 2.328973  | 3.755353  | -3.078165 |
| C           | -5.636565 | -2.940661 | 0.695594  | H  | 0.934436  | 5.222979  | -1.630145 |
| H           | -6.414464 | -1.344938 | 1.923792  | C  | 3.601323  | -0.622498 | -0.862898 |
| H           | -4.599751 | -4.353600 | -0.564050 | C  | 4.823409  | -0.090350 | -0.421247 |

|             |          |           |           |   |          |           |           |
|-------------|----------|-----------|-----------|---|----------|-----------|-----------|
| C           | 3.591231 | -1.482861 | -1.969123 | C | 2.112574 | -1.043203 | 1.347839  |
| C           | 6.011115 | -0.417664 | -1.073268 | C | 1.298822 | -0.589952 | 2.400923  |
| H           | 4.848510 | 0.573521  | 0.437838  | C | 1.094796 | -1.377782 | 3.532000  |
| C           | 4.781694 | -1.804445 | -2.626556 | C | 1.704695 | -2.632919 | 3.628271  |
| H           | 2.650182 | -1.903653 | -2.312698 | H | 3.008472 | -4.056888 | 2.666246  |
| C           | 5.991983 | -1.274309 | -2.178589 | H | 3.354642 | -2.667892 | 0.651213  |
| H           | 6.952530 | -0.005554 | -0.719402 | H | 0.787754 | 0.364751  | 2.314958  |
| H           | 4.759960 | -2.474282 | -3.481767 | H | 0.435757 | -1.022622 | 4.319261  |
| H           | 6.919400 | -1.529115 | -2.684625 | H | 1.533836 | -3.256774 | 4.501520  |
| C           | 2.375601 | -0.196572 | 1.740848  | C | 3.438867 | 1.272529  | 0.211218  |
| C           | 2.954052 | 0.888427  | 2.416813  | C | 4.582163 | 0.993879  | 0.978165  |
| C           | 2.043485 | -1.350756 | 2.468587  | C | 3.226759 | 2.574940  | -0.264205 |
| C           | 3.186418 | 0.823059  | 3.791885  | C | 5.507970 | 2.001415  | 1.247492  |
| H           | 3.201368 | 1.796832  | 1.876189  | H | 4.739834 | -0.007632 | 1.369640  |
| C           | 2.283284 | -1.418054 | 3.841431  | C | 4.157031 | 3.580805  | 0.006296  |
| H           | 1.577860 | -2.189094 | 1.955845  | H | 2.323782 | 2.806358  | -0.823630 |
| C           | 2.850851 | -0.328452 | 4.507393  | C | 5.297441 | 3.294761  | 0.758920  |
| H           | 3.626880 | 1.674549  | 4.303917  | H | 6.389923 | 1.780248  | 1.842878  |
| H           | 2.017743 | -2.317011 | 4.391173  | H | 3.981031 | 4.587891  | -0.361109 |
| H           | 3.029115 | -0.376189 | 5.578383  | H | 6.017527 | 4.079577  | 0.974957  |
| P           | 1.994853 | -0.189000 | -0.064877 | C | 2.962962 | -1.132335 | -1.409269 |
|             |          |           |           | C | 4.312154 | -1.072152 | -1.783002 |
| HCl         |          |           |           | C | 2.134298 | -2.111763 | -1.986568 |
| Cl          | 0.000000 | 0.000000  | 0.071667  | C | 4.825069 | -1.979923 | -2.713916 |
| H           | 0.000000 | 0.000000  | -1.218333 | H | 4.963528 | -0.318635 | -1.351251 |
|             |          |           |           | C | 2.653941 | -3.025395 | -2.901436 |
| <b>TS9D</b> |          |           |           | H | 1.083864 | -2.164428 | -1.713110 |
| C           | 2.528128 | -3.084267 | 2.595110  | C | 4.001001 | -2.959685 | -3.270043 |
| C           | 2.732459 | -2.295075 | 1.459002  | H | 5.871590 | -1.920257 | -3.001189 |

|    |           |           |           |            |           |           |           |
|----|-----------|-----------|-----------|------------|-----------|-----------|-----------|
| H  | 2.002154  | -3.782175 | -3.329606 | C          | -2.105421 | 0.700900  | 2.401560  |
| H  | 4.404350  | -3.665447 | -3.991371 | C          | -3.003384 | -1.541240 | 3.803589  |
| P  | 2.183408  | -0.005127 | -0.181113 | H          | -2.942150 | -2.567280 | 1.914955  |
| Pd | -0.087235 | 0.601296  | -0.629892 | C          | -2.335517 | 0.782262  | 3.775361  |
| H  | -0.930439 | 2.023228  | -0.454551 | H          | -1.743286 | 1.571830  | 1.861809  |
| C  | -0.254973 | -4.274645 | -0.040835 | C          | -2.779539 | -0.339937 | 4.480212  |
| C  | -0.684169 | -3.000635 | 0.326248  | H          | -3.348551 | -2.417212 | 4.346545  |
| C  | -1.616826 | -2.306743 | -0.467024 | H          | -2.160016 | 1.720716  | 4.294130  |
| C  | -2.104785 | -2.915224 | -1.633180 | H          | -2.950075 | -0.278488 | 5.551783  |
| C  | -1.666336 | -4.189900 | -1.999990 | P          | -1.973268 | -0.538900 | -0.092821 |
| C  | -0.740273 | -4.872180 | -1.207789 | I          | -0.908623 | 3.934802  | -0.471988 |
| H  | 0.471483  | -4.789560 | 0.581401  |            |           |           |           |
| H  | -0.283044 | -2.541023 | 1.223295  | HI         |           |           |           |
| H  | -2.823686 | -2.392729 | -2.257336 | I          | 0.000000  | 0.000000  | 0.030366  |
| H  | -2.051411 | -4.648854 | -2.906795 | H          | 0.000000  | 0.000000  | -1.609410 |
| H  | -0.398856 | -5.862411 | -1.497212 |            |           |           |           |
| C  | -3.597502 | -0.210451 | -0.883288 | <b>5aa</b> |           |           |           |
| C  | -4.753869 | -0.928808 | -0.538475 | C          | -1.628654 | 0.578214  | 0.855503  |
| C  | -3.673282 | 0.792621  | -1.859006 | C          | -1.953561 | -0.472549 | -0.241451 |
| C  | -5.965478 | -0.650414 | -1.167865 | C          | -1.304720 | -1.720145 | 0.321454  |
| H  | -4.705774 | -1.701094 | 0.224398  | C          | -1.166047 | -2.994916 | -0.206810 |
| C  | -4.890083 | 1.070729  | -2.487525 | C          | -0.395907 | -3.944684 | 0.482636  |
| H  | -2.782771 | 1.360404  | -2.114180 | C          | 0.232794  | -3.603610 | 1.681876  |
| C  | -6.034107 | 0.349696  | -2.144067 | C          | 0.109449  | -2.317039 | 2.223051  |
| H  | -6.857247 | -1.209132 | -0.896350 | C          | -0.662469 | -1.395266 | 1.525162  |
| H  | -4.940946 | 1.854079  | -3.238501 | H          | -1.639286 | -3.251670 | -1.150893 |
| H  | -6.981067 | 0.567575  | -2.630749 | H          | -0.286261 | -4.946777 | 0.078632  |
| C  | -2.325617 | -0.504634 | 1.715428  | H          | 0.831802  | -4.343125 | 2.206049  |
| C  | -2.782047 | -1.623581 | 2.427734  | H          | 0.613787  | -2.047320 | 3.145342  |

|   |           |           |           |   |           |           |           |
|---|-----------|-----------|-----------|---|-----------|-----------|-----------|
| N | -0.894462 | -0.050253 | 1.840829  | H | 0.869197  | 3.399889  | -1.990449 |
| C | -0.330171 | 0.640804  | 2.981124  | C | 0.206671  | 4.984718  | 0.214559  |
| H | 0.764076  | 0.665158  | 2.916277  | H | 0.306181  | 2.976201  | 0.990196  |
| H | -0.717766 | 1.660541  | 2.974142  | H | 1.834644  | 3.554627  | 0.320875  |
| H | -0.623020 | 0.144031  | 3.912687  | C | 0.527064  | 5.692193  | 1.534695  |
| O | -1.924970 | 1.762506  | 0.844221  | H | 0.621156  | 5.561887  | -0.624811 |
| C | -3.464433 | -0.541859 | -0.481890 | H | -0.881702 | 4.958344  | 0.066570  |
| C | -4.149273 | 0.613527  | -0.894359 | H | 0.129905  | 6.713638  | 1.551248  |
| C | -4.198538 | -1.720169 | -0.300128 | H | 0.091921  | 5.150369  | 2.383589  |
| C | -5.521125 | 0.581766  | -1.136644 | H | 1.610370  | 5.750852  | 1.698767  |
| H | -3.608689 | 1.548375  | -0.989369 | C | 3.829941  | -0.572029 | -0.712460 |
| C | -5.573275 | -1.752268 | -0.546748 | C | 4.902640  | 0.336883  | -0.697130 |
| H | -3.703113 | -2.620094 | 0.045815  | C | 4.093571  | -1.932766 | -0.467461 |
| C | -6.240018 | -0.604159 | -0.971060 | C | 6.200797  | -0.106393 | -0.452832 |
| H | -6.030142 | 1.489115  | -1.451226 | H | 4.707347  | 1.388352  | -0.880694 |
| H | -6.120629 | -2.679975 | -0.400772 | C | 5.393375  | -2.369636 | -0.229868 |
| H | -7.309244 | -0.629338 | -1.163856 | H | 3.271568  | -2.643025 | -0.446595 |
| C | -1.199336 | -0.023842 | -1.546449 | C | 6.455024  | -1.460015 | -0.221520 |
| H | -1.364254 | -0.804677 | -2.297928 | H | 7.018534  | 0.609702  | -0.446007 |
| H | -1.678905 | 0.884285  | -1.919372 | H | 5.578676  | -3.424158 | -0.042173 |
| C | 0.269529  | 0.215165  | -1.342593 | H | 7.468507  | -1.803138 | -0.032510 |
| C | 1.293904  | -0.780309 | -1.204608 |   |           |           |           |
| C | 0.894066  | 1.426253  | -1.183557 |   |           |           |           |
| C | 2.469209  | -0.123888 | -0.965851 |   |           |           |           |
| H | 1.157364  | -1.849834 | -1.264528 |   |           |           |           |
| O | 2.231552  | 1.230602  | -0.962822 |   |           |           |           |
| C | 0.422025  | 2.838978  | -1.156320 |   |           |           |           |
| C | 0.747200  | 3.552795  | 0.169611  |   |           |           |           |
| H | -0.661847 | 2.840162  | -1.305590 |   |           |           |           |



## 12) References

1. H. Y. Kim, J.-Y. Li, K. Oh, *J. Org. Chem.* **2012**, *77*, 11132-11145.
2. (a) H. Yoon, A. Lossouarn, F. Landau, M. Lautens, *Org. Lett.* **2016**, *18*, 6324-6327; (b) C. Shao, Z. Wu, X. Ji, B. Zhou, Y. Zhang, *Chem. Commun.* **2017**, *53*, 10429-10432; (c) G. Xiao, L. Chen, G. Deng, J. Liu, Y. Liang, *Tetrahedron Lett.* **2018**, *59*, 1836-1840.
3. (a) T. Kashiwabara, M. Tanaka, *Adv. Synth. Catal.* **2011**, *353*, 1485-1490; (b) Y. Zhang, J. Zhang, Y. Yuan, L. Liu, B. Chen, T. Sun, *Eur. J. Org. Chem.* **2020**, 1976-1986; (c) R. Hou, Z. Wang, J. Peng, Y. Yuan, J. Zhang, D. Wang, T. Sun, *Asian J. Org. Chem.* **2021**, *10*, 3334-3342.
4. Gaussian 09, Revision E.01, Frisch, M. J.; Trucks, G. W.; Schlegel, H. B.; Scuseria, G. E.; Robb, M. A.; Cheeseman, J. R.; Scalmani, G.; Barone, V.; Mennucci, B.; Petersson, G. A.; Nakatsuji, H.; Caricato, M.; Li, X.; Hratchian, H. P.; Izmaylov, A. F.; Bloino, J.; Zheng, G.; Sonnenberg, J. L.; Hada, M.; Ehara, M.; Toyota, K.; Fukuda, R.; Hasegawa, J.; Ishida, M.; Nakajima, T.; Honda, Y.; Kitao, O.; Nakai, H.; Vreven, T.; Montgomery, J. A.; Peralta, Jr., J. E.; Ogliaro, F.; Bearpark, M.; Heyd, J. J.; Brothers, E.; Kudin, K. N.; Staroverov, V. N.; Keith, T.; Kobayashi, R.; Normand, J.; Raghavachari, K.; Rendell, A.; Burant, J. C.; Iyengar, S. S.; Tomasi, J.; Cossi, M.; Rega, N.; Millam, J. M.; Klene, M.; Knox, J. E.; Cross, J. B.; Bakken, V.; Adamo, C.; Jaramillo, J.; Gomperts, R.; Stratmann, R. E.; Yazyev, O.; Austin, A. J.; Cammi, R.; Pomelli, C.; Ochterski, J. W.; Martin, R. L.; Morokuma, K.; Zakrzewski, V. G.; Voth, G. A.; Salvador, P.; Dannenberg, J. J.; Dapprich, S.; Daniels, A. D.; Farkas, O.; Foresman, J. B.; Ortiz, J. V.; Cioslowski, J.; and Fox, D. J. Gaussian, Inc., Wallingford CT, **2013**.
5. (a) A. D. Becke, *J. Chem. Phys.* **1993**, *98*, 5648-5456; (b) C. Lee, W. Yang, R. G. Parr, *Phys. Rev. B*, **1988**, *37*, 785-789.
6. S. Grimme, J. Antony, S. Ehrlich, H. Krieg, *J. Chem. Phys.* **2010**, *132*, 154104-154123.
7. (a) M. Dolg, U. Wedig, H. Stoll, H. Preuss, *J. Chem. Phys.* **1987**, *86*, 866-872; (b) A. Nicklass, M. Dolg, H. Stoll, H. Preuss, *J. Chem. Phys.* **1995**, *102*, 8942-8952.
8. (a) R. Ditchfield, W. J. Hehre, J. A. Pople, *J. Chem. Phys.* **1971**, *54*, 724-728; (b) W. J. Hehre, R. Ditchfield, J. A. Pople, *J. Chem. Phys.* **1972**, *56*, 2257-2261; (c) P. C. Hariharan, J. A. Pople, *Theor. Chem. Acc.* **1973**, *28*, 213-217.
9. Y. Zhao, D. G. Truhlar, *Theor. Chem. Acc.* **2008**, *120*, 215-241.
10. (a) T. Clark, J. Chandrasekhar, G. W. Spitznagel, P. Von R. Schleyer, *J. Comput. Chem.* **1983**, *4*, 294-301; (b) R. Krishnan, J. S. Binkley, R. Seeger, J. A. Pople, *J. Chem. Phys.* **1980**, *72*, 650-654.
11. A. V. Marenich, C. J. Cramer, D. G. Truhlar, *J. Phys. Chem. B.* **2009**, *113*, 6378-6396.
12. C. Y. Legault, CYL View, version 1.0 b; Universite de Sherbrooke, Sherbrooke, Quebec, Canada, **2009**; <http://www.cylview.org>.

### 13) NMR Spectra

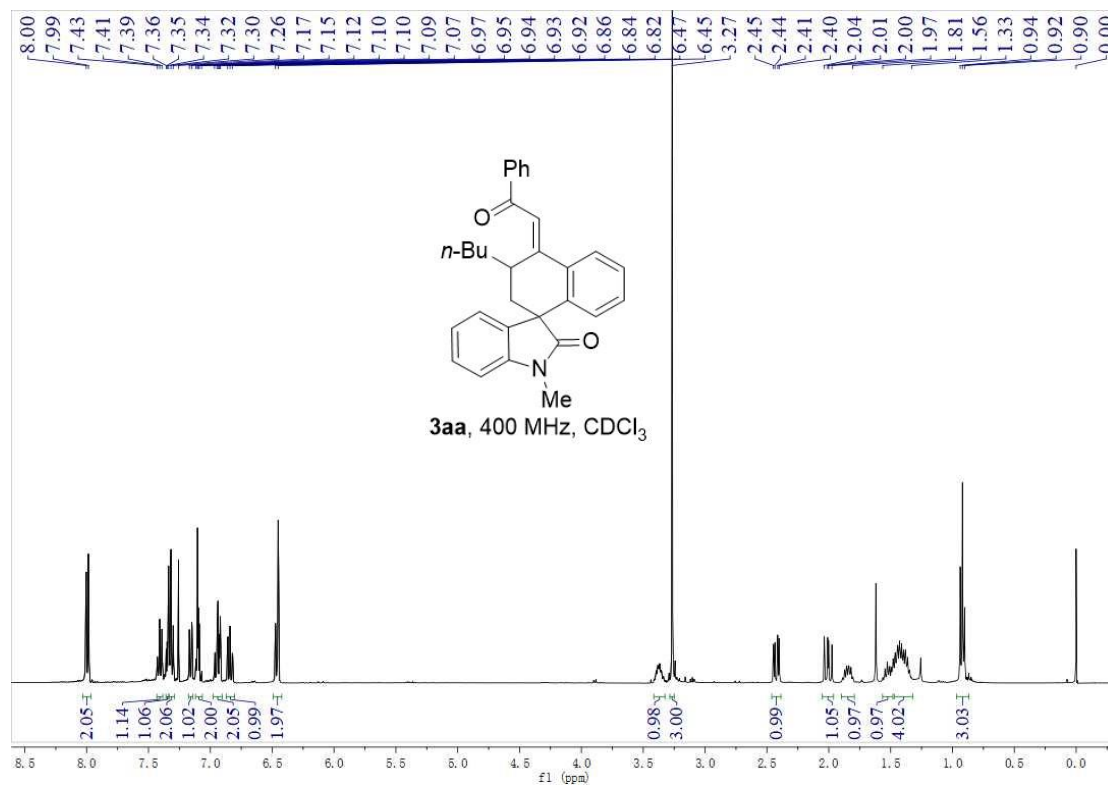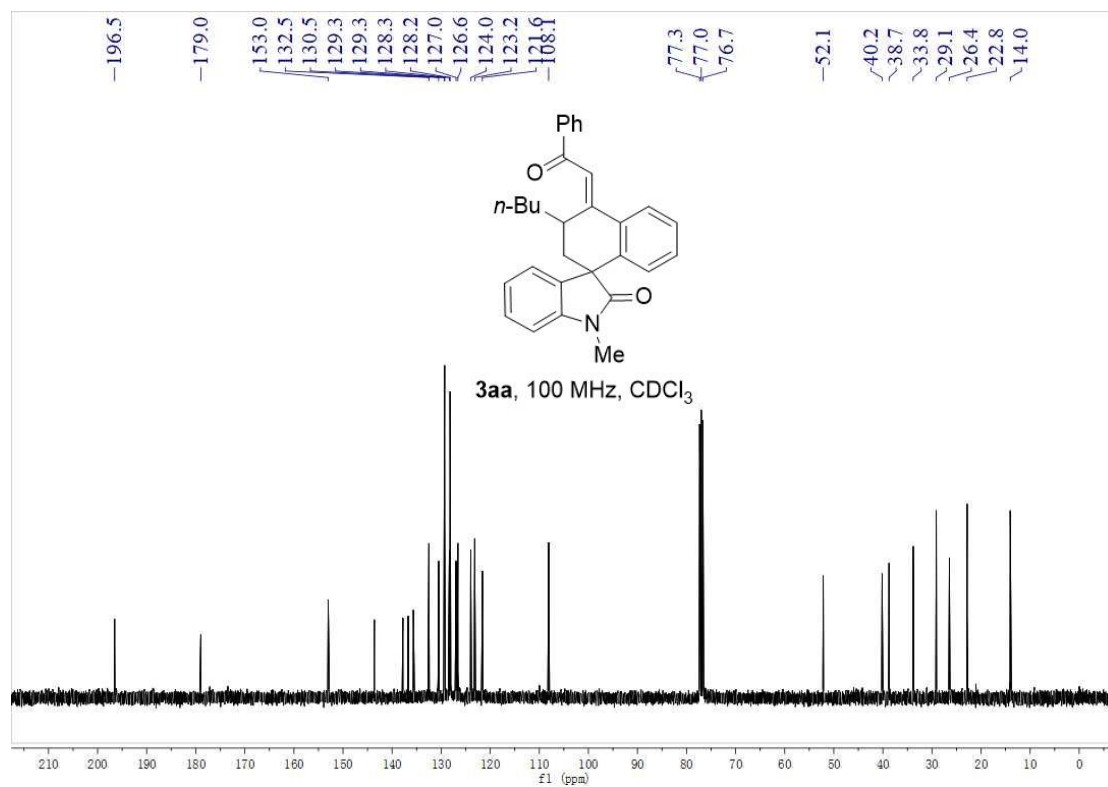

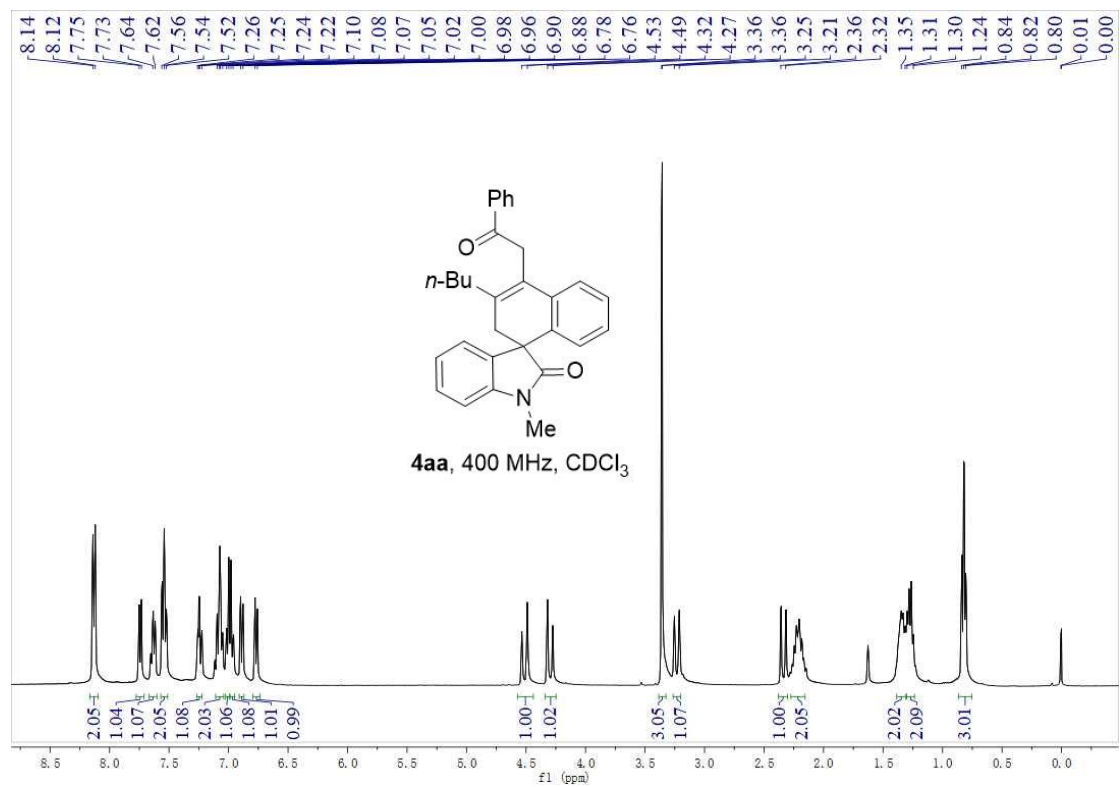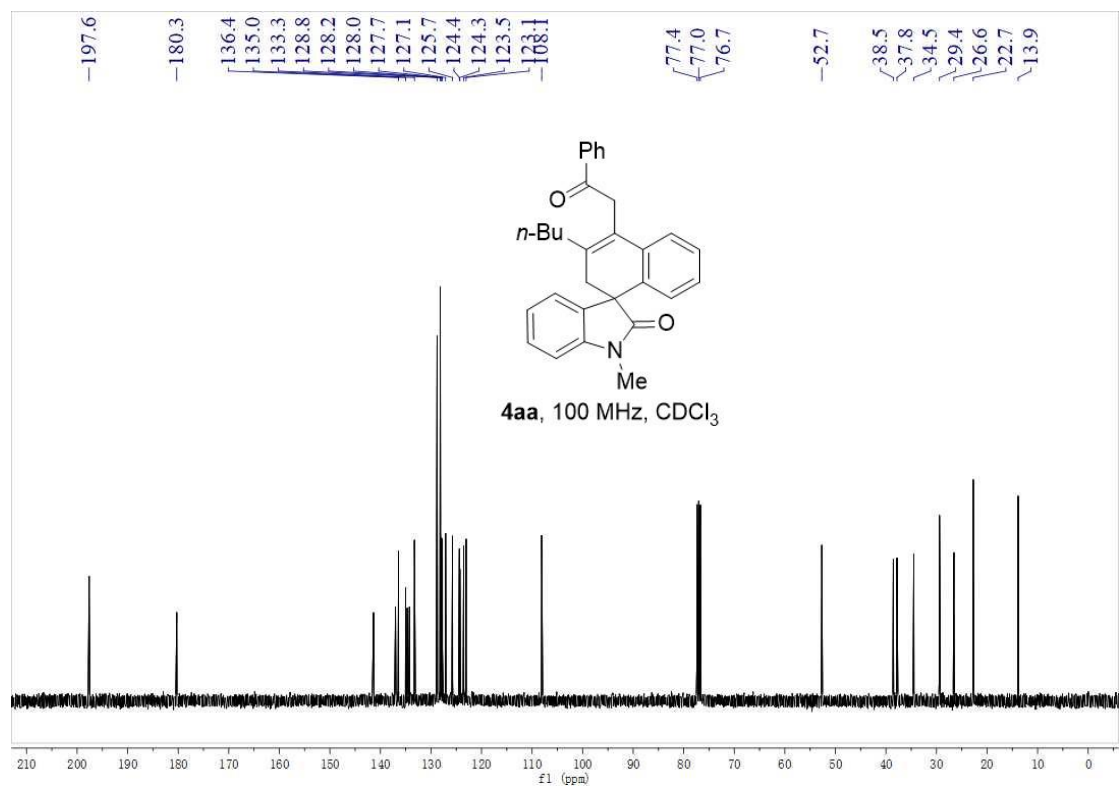

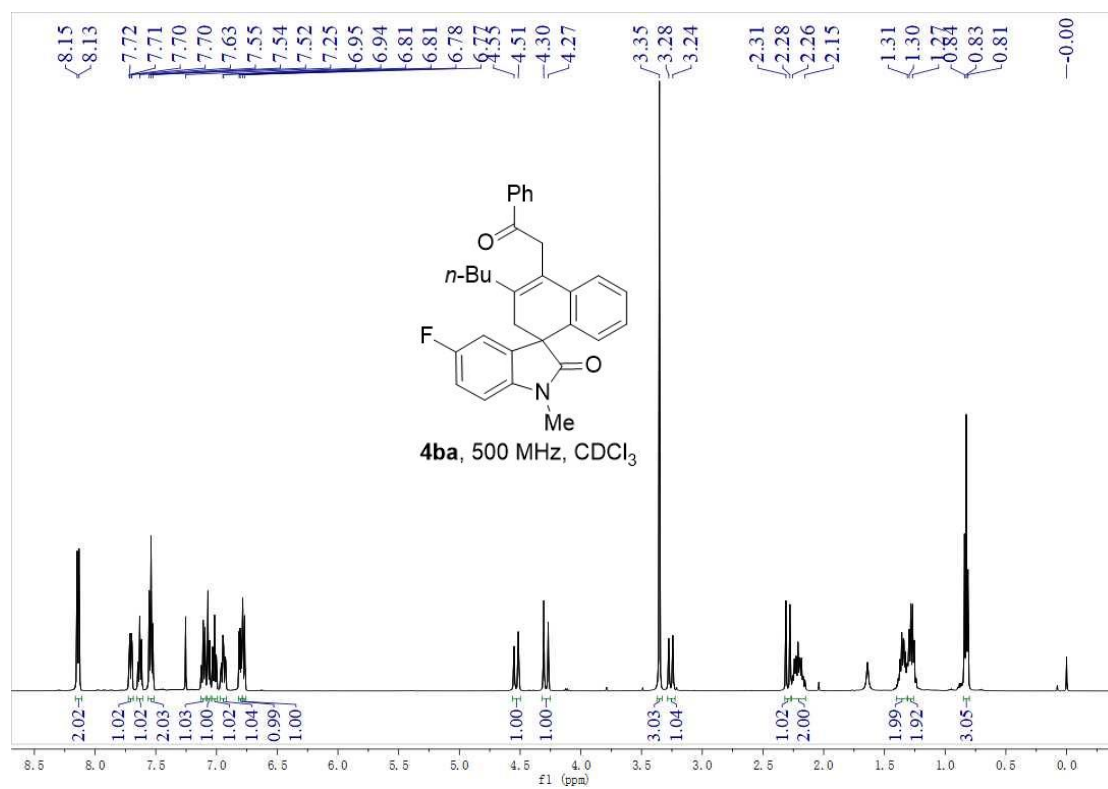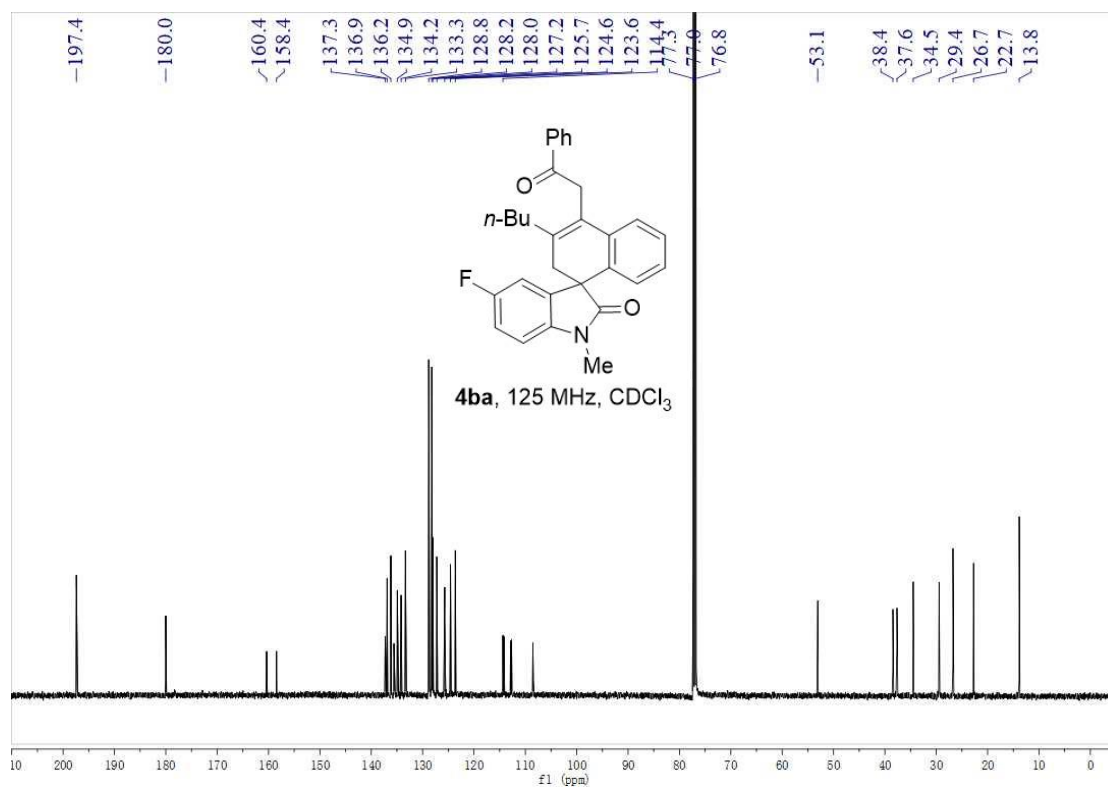

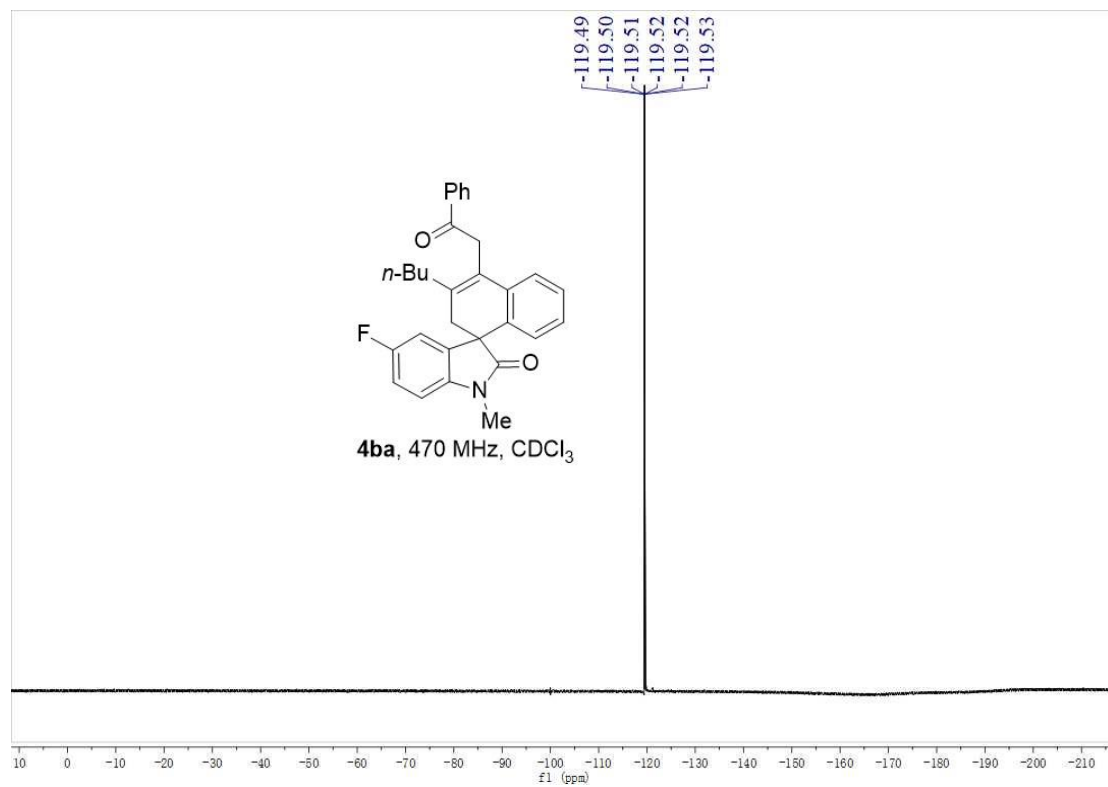

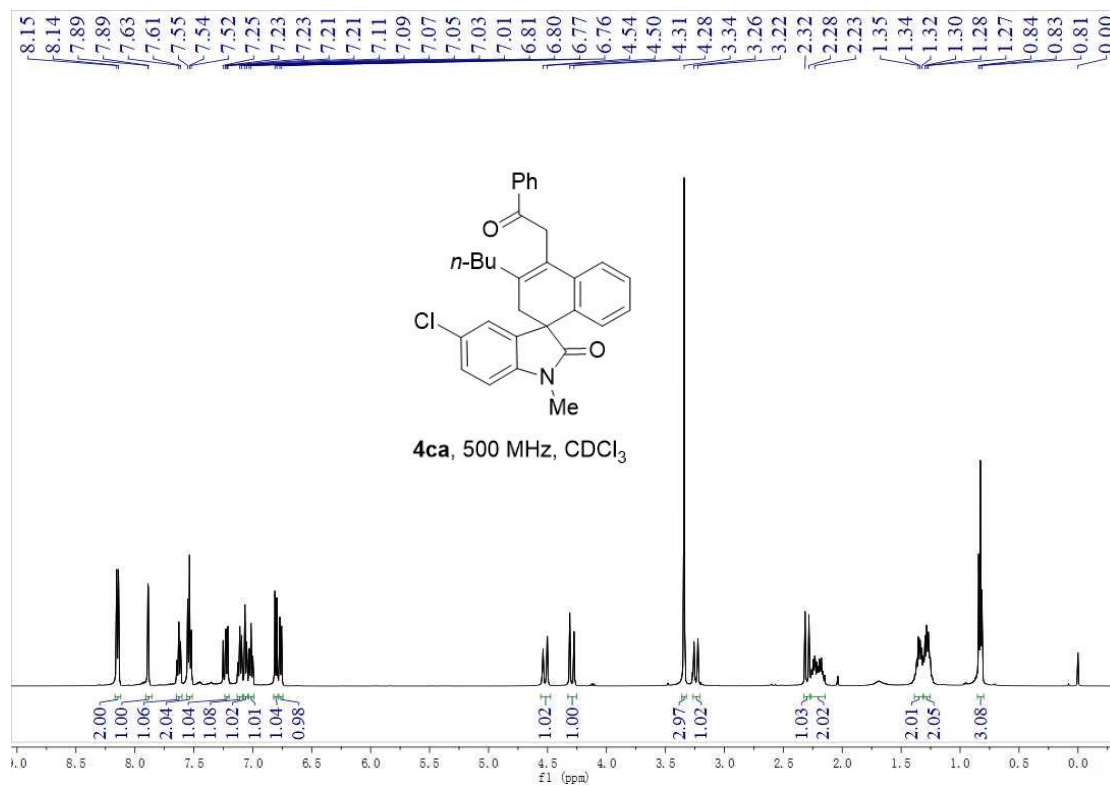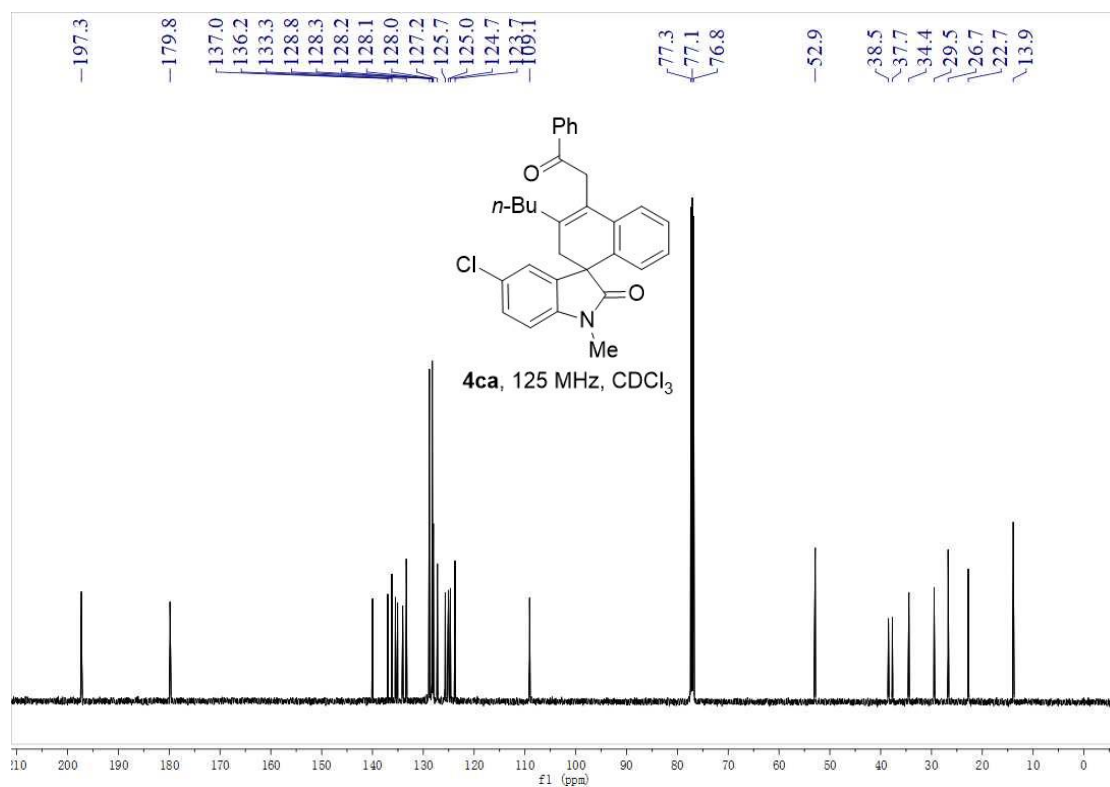

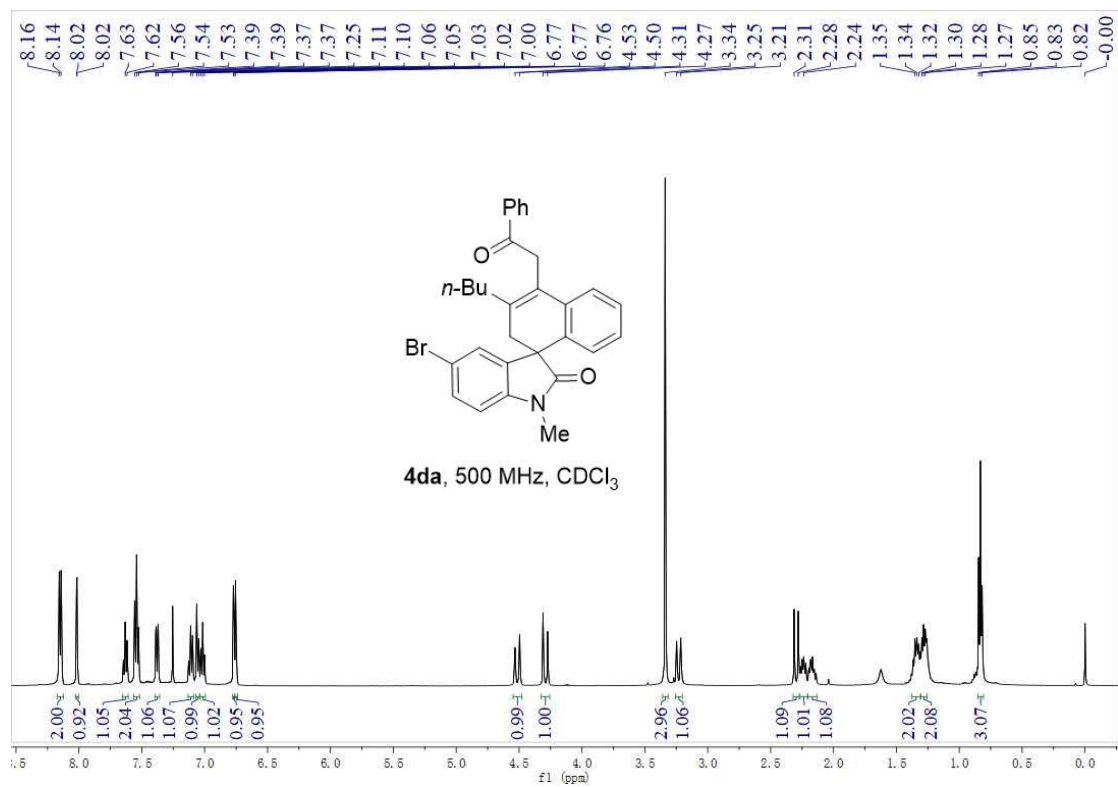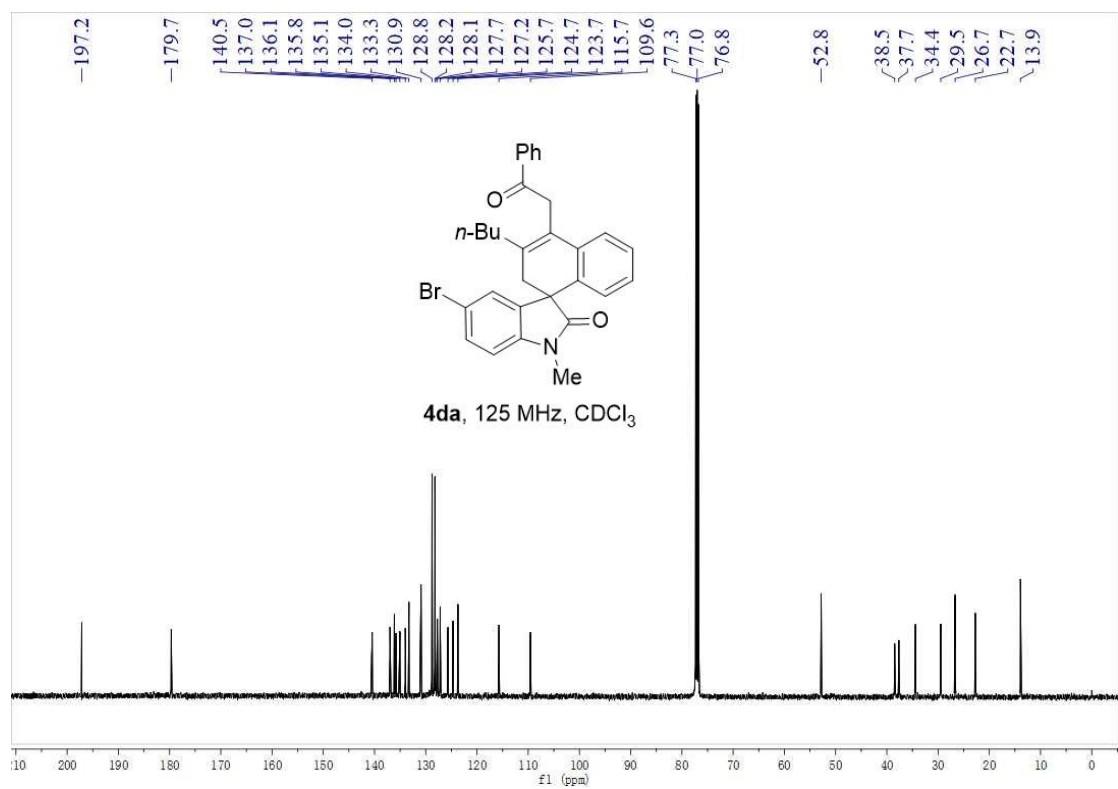

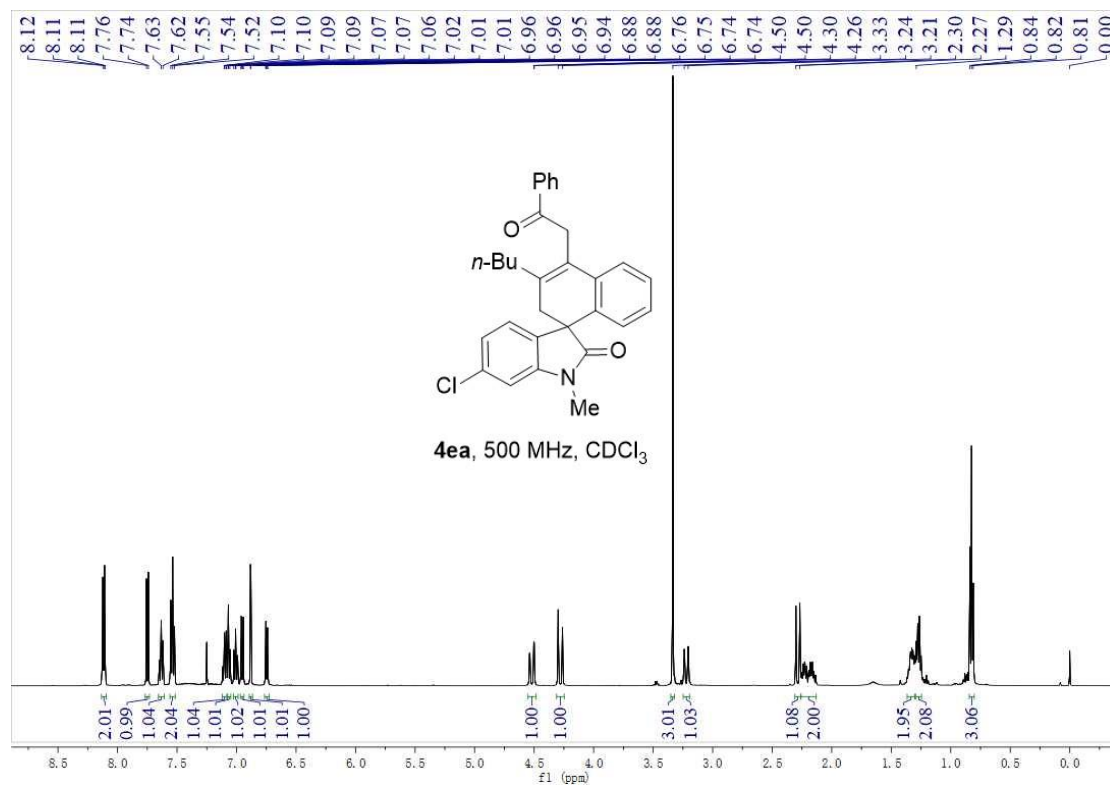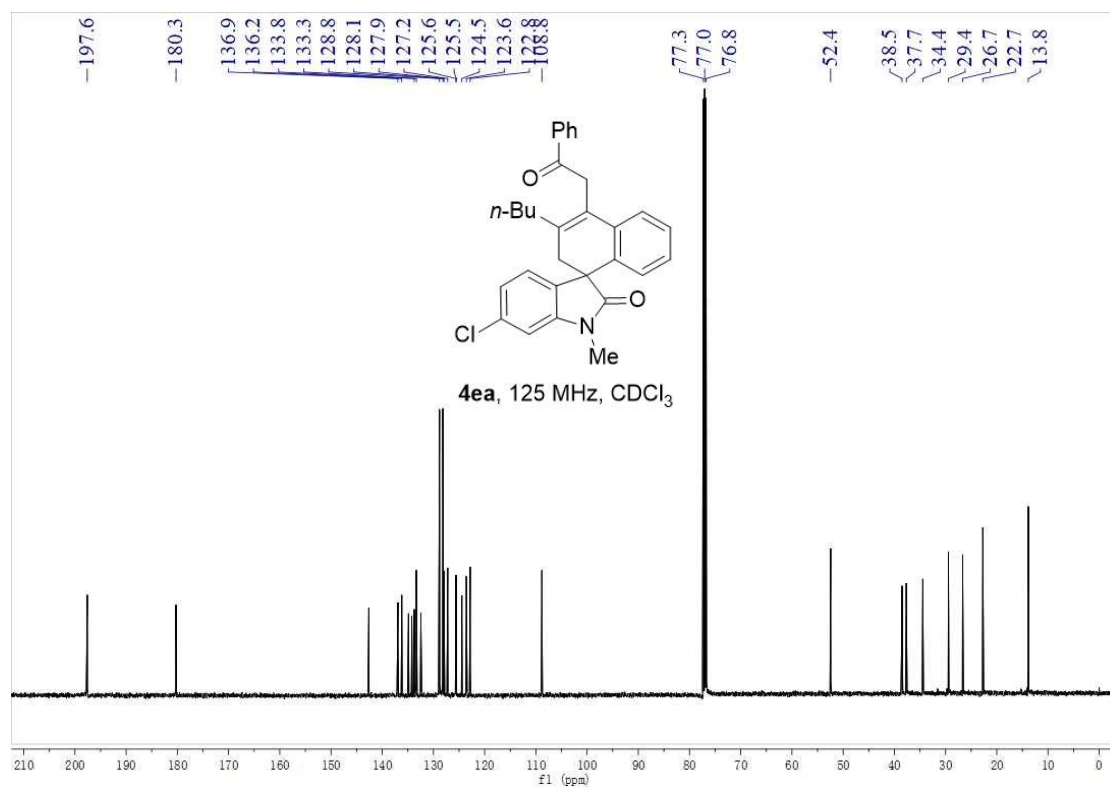



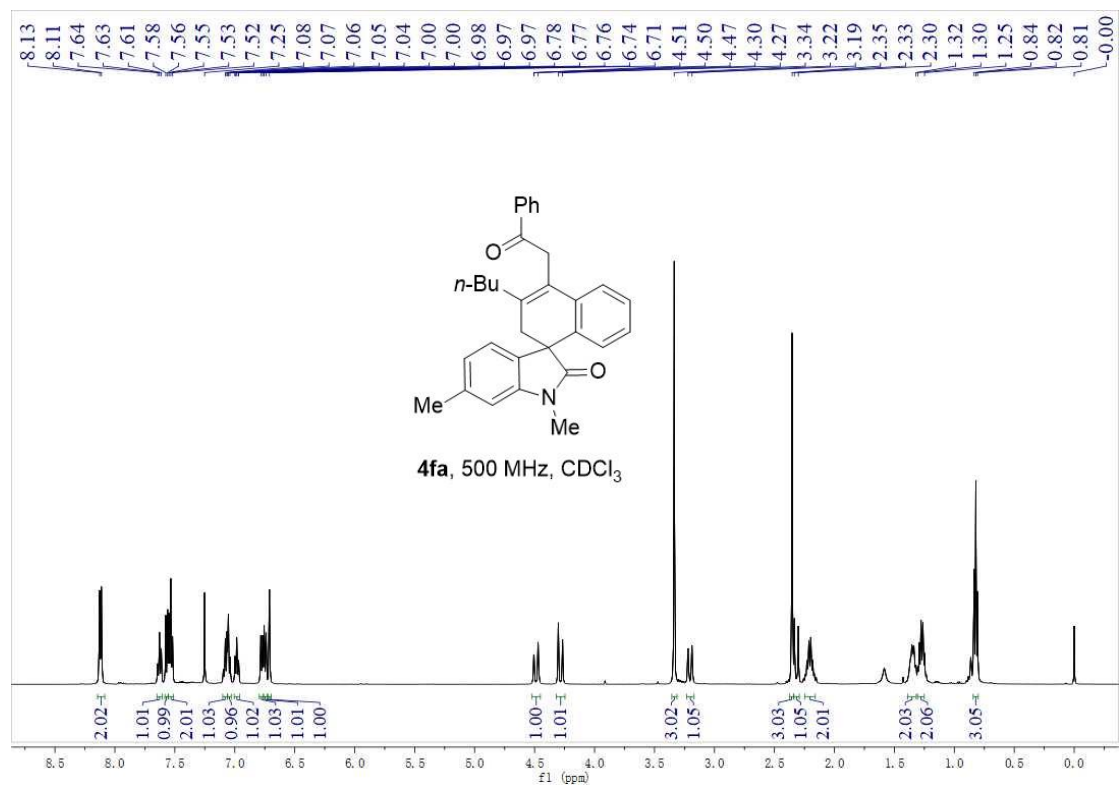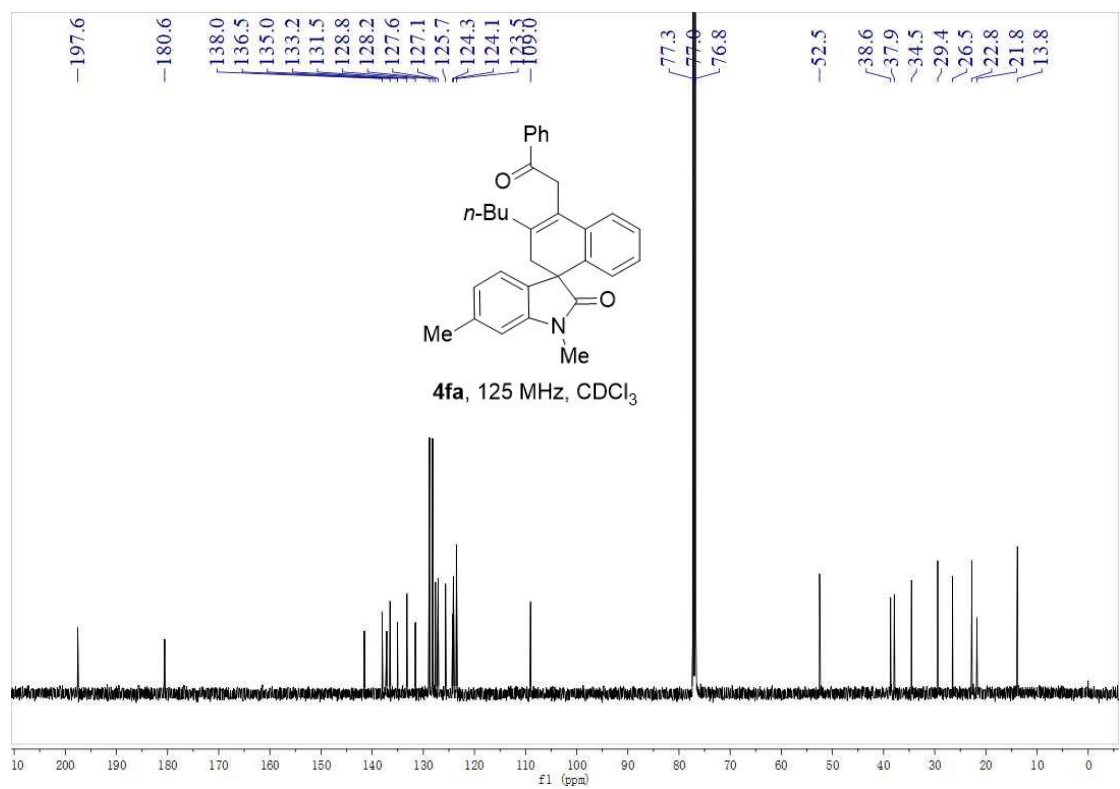

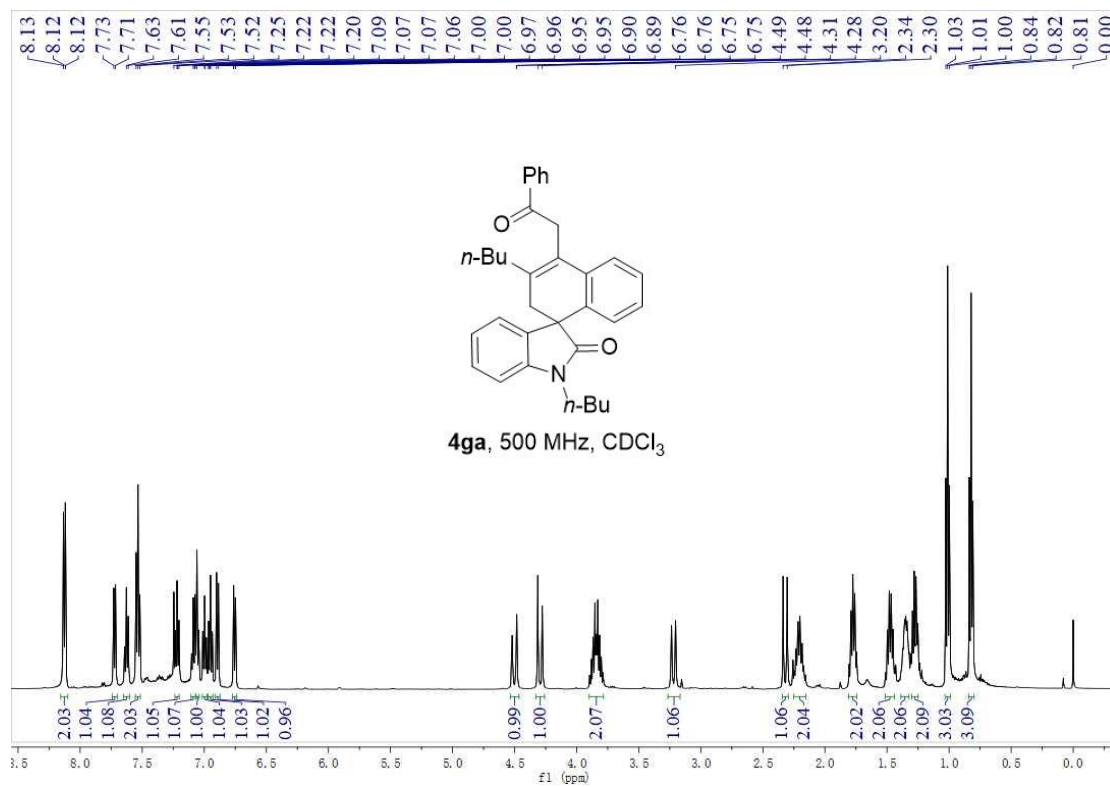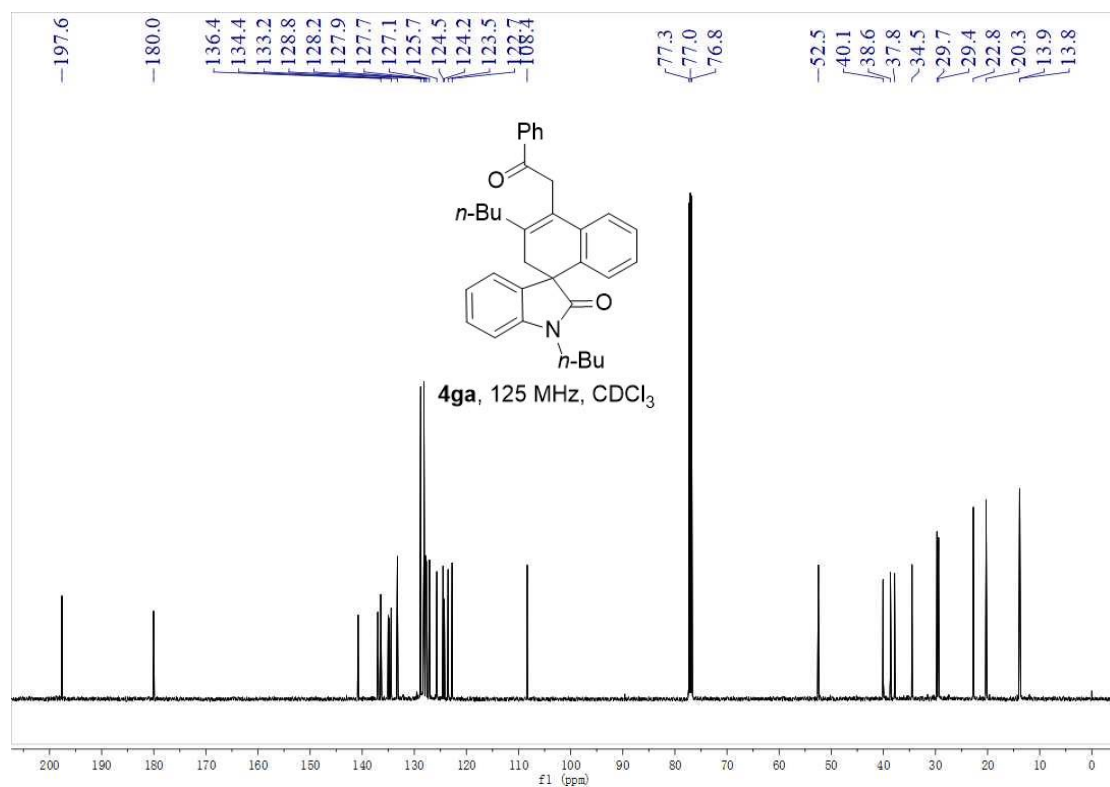

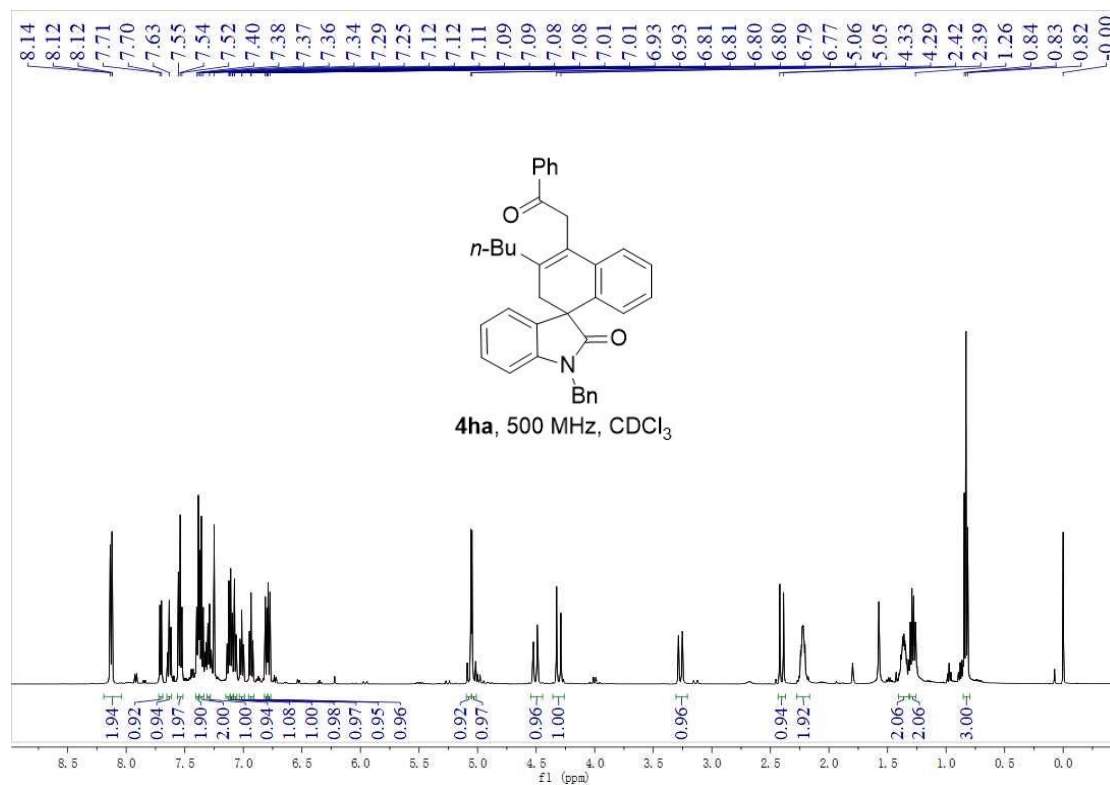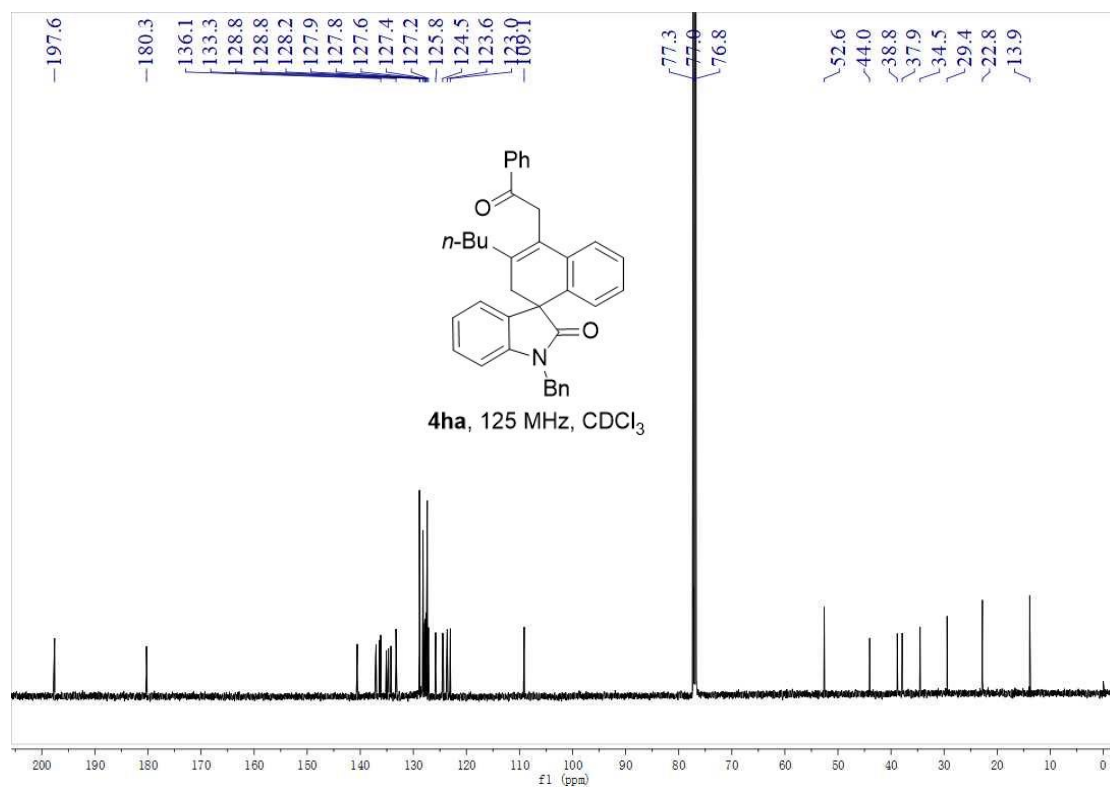

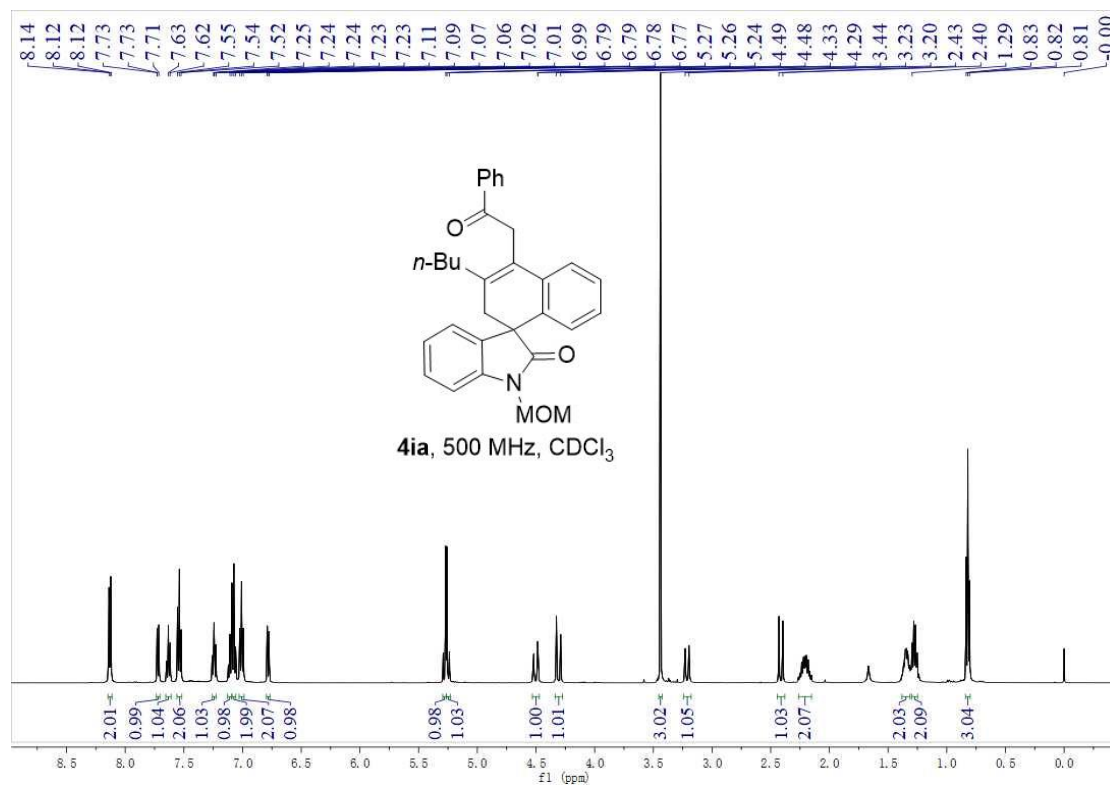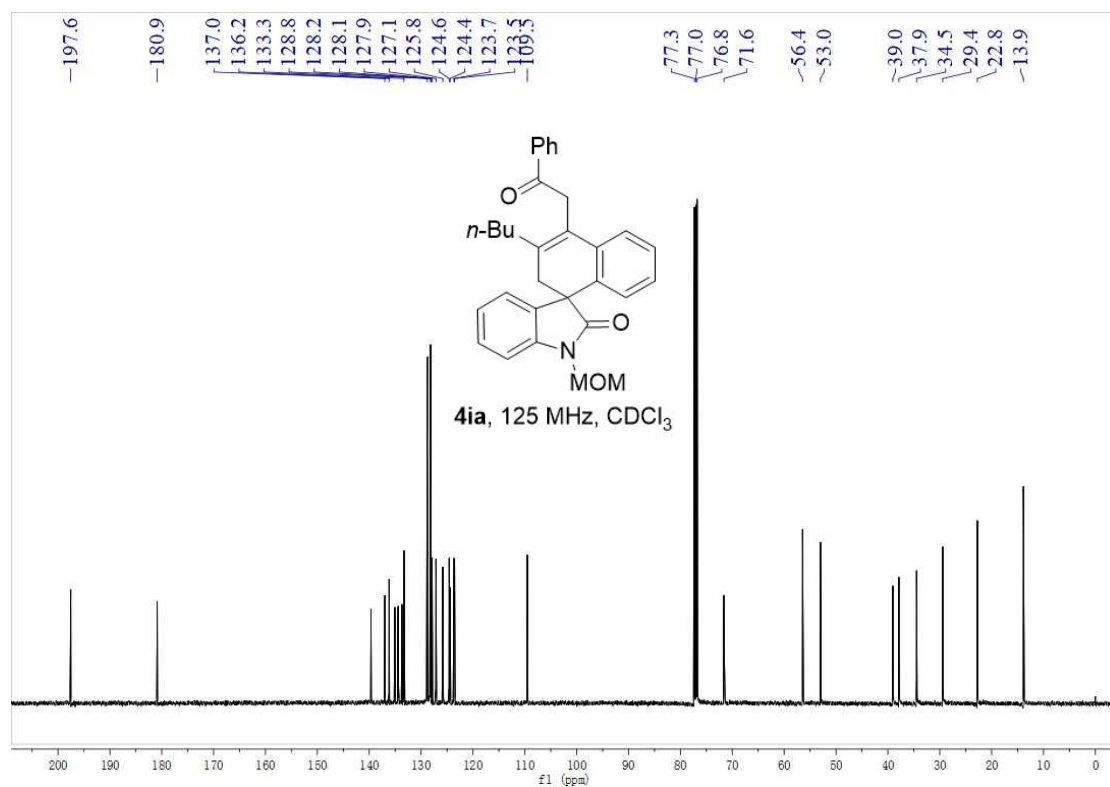

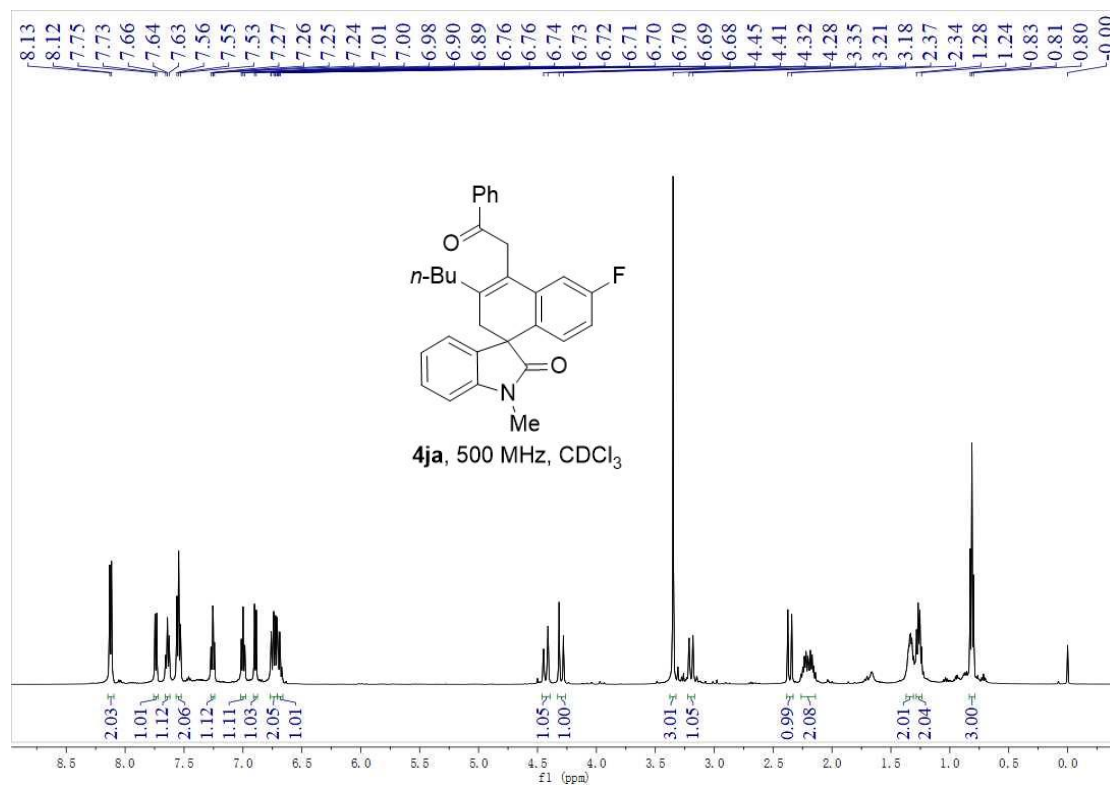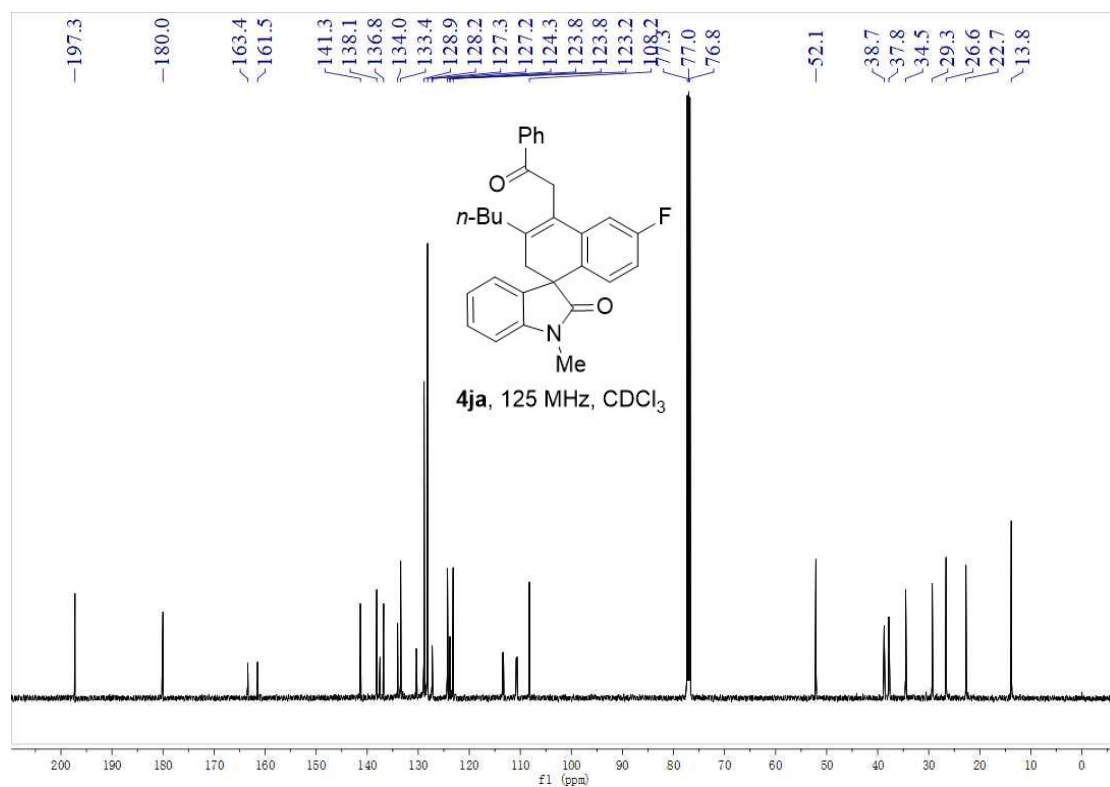

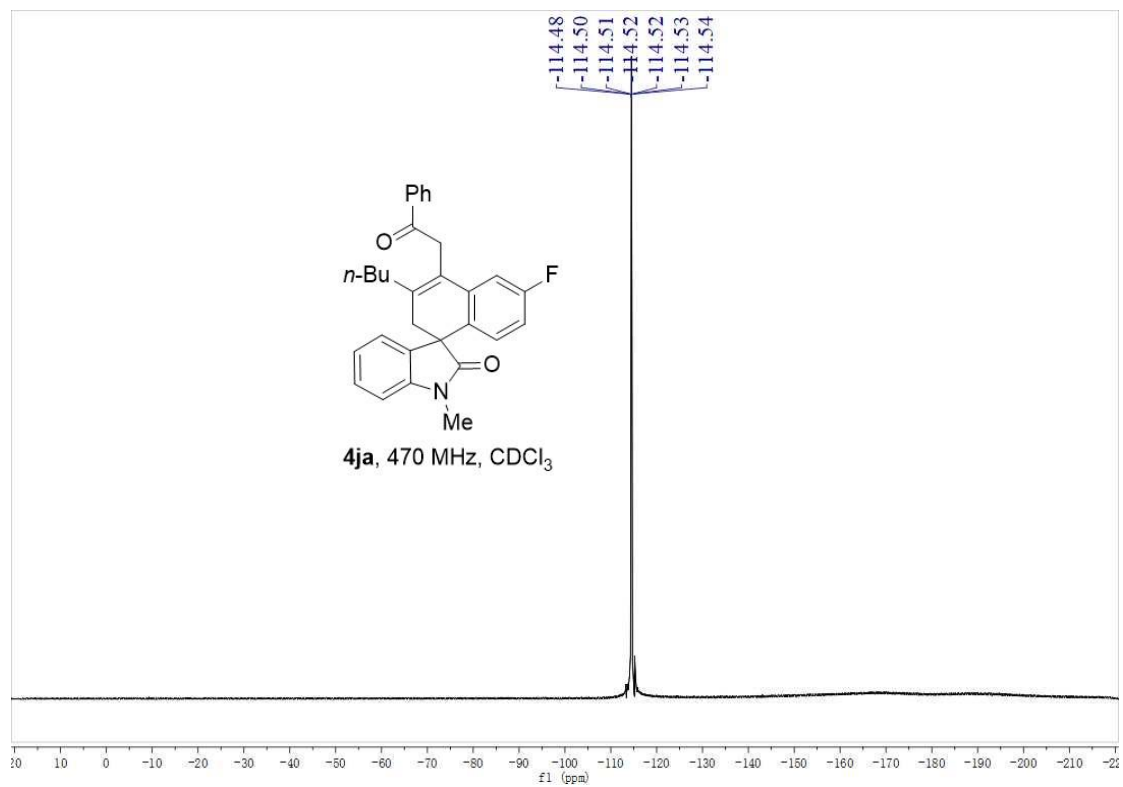

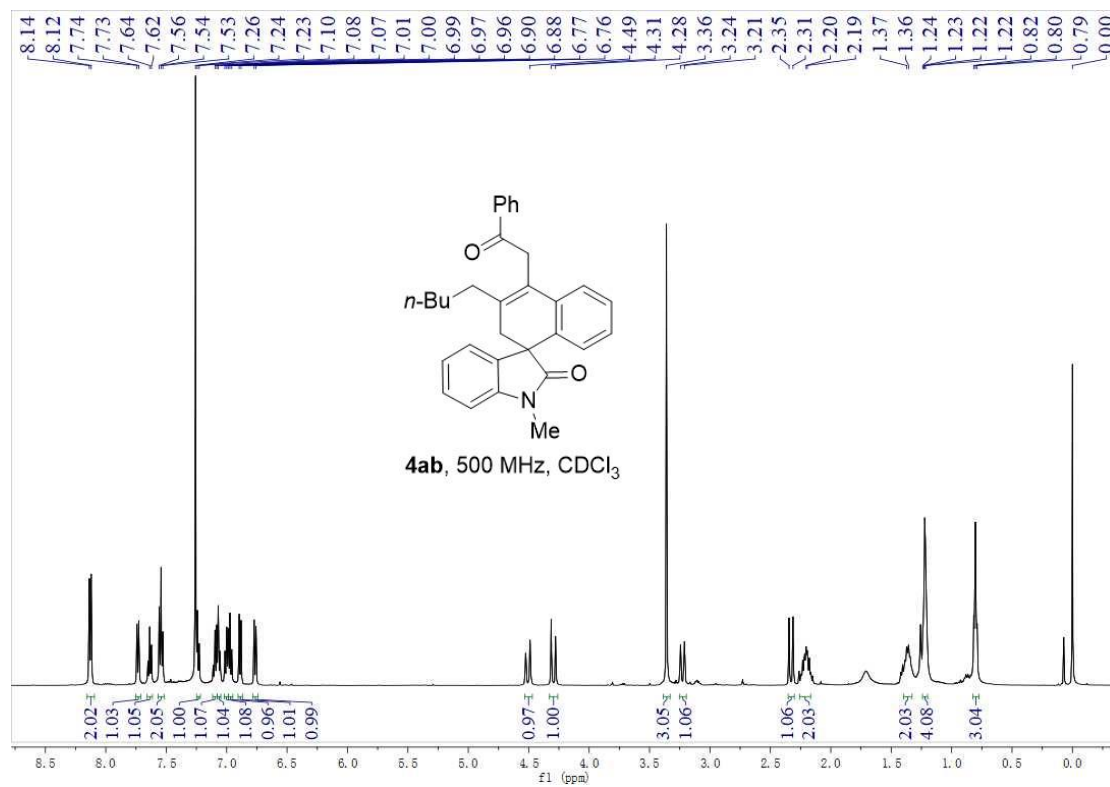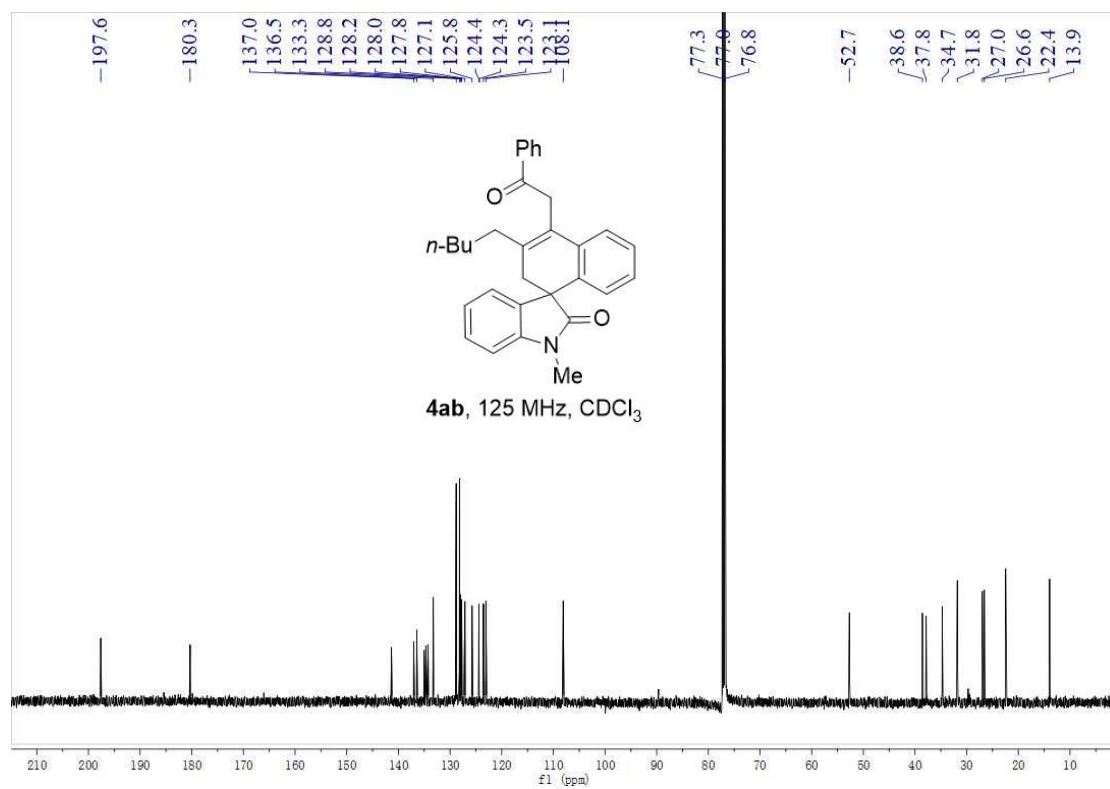

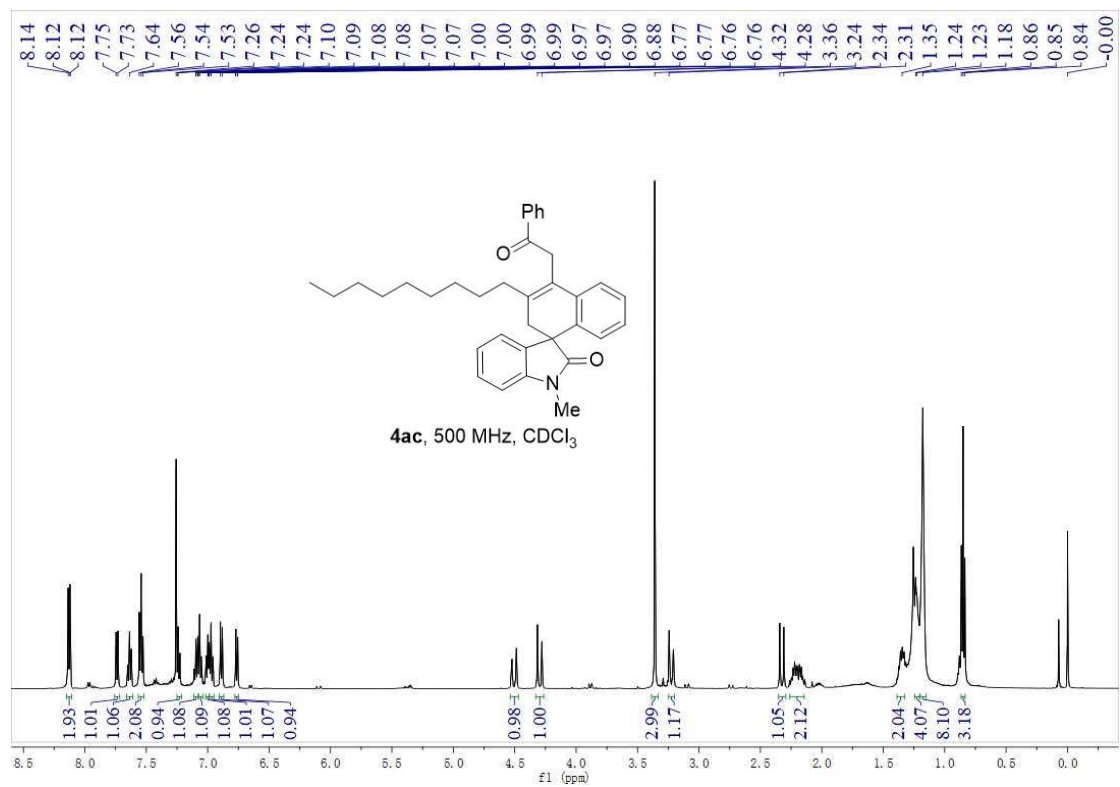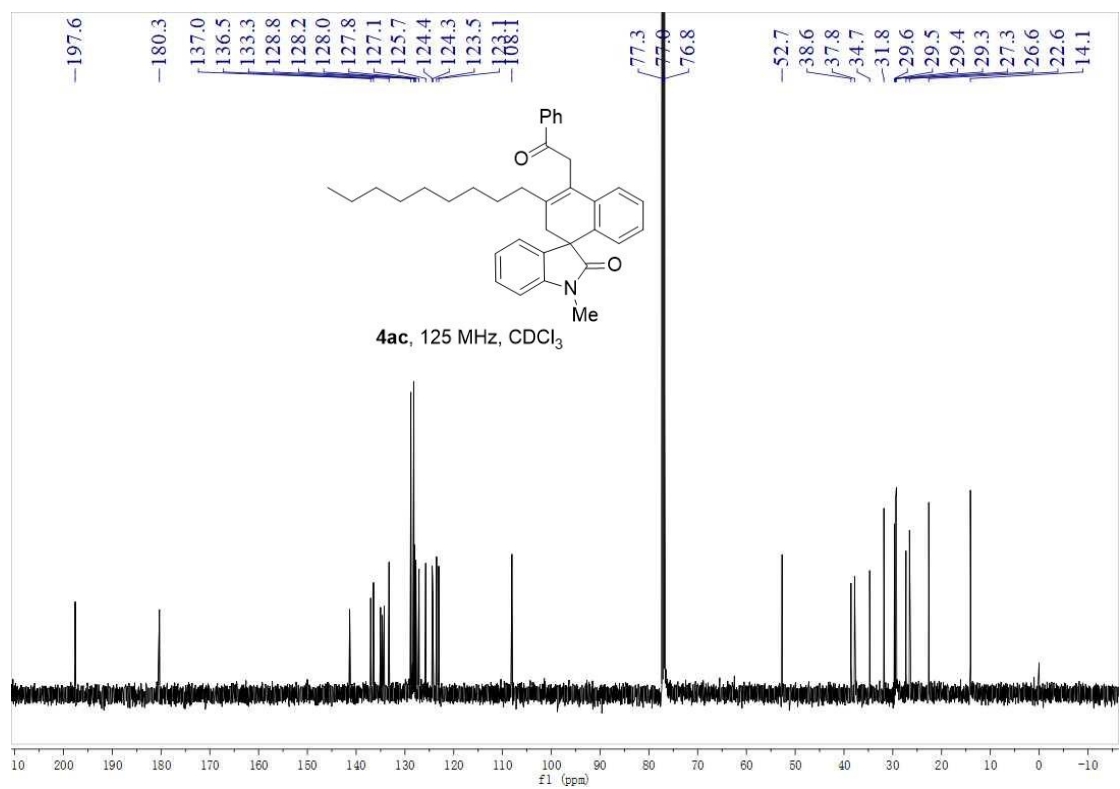



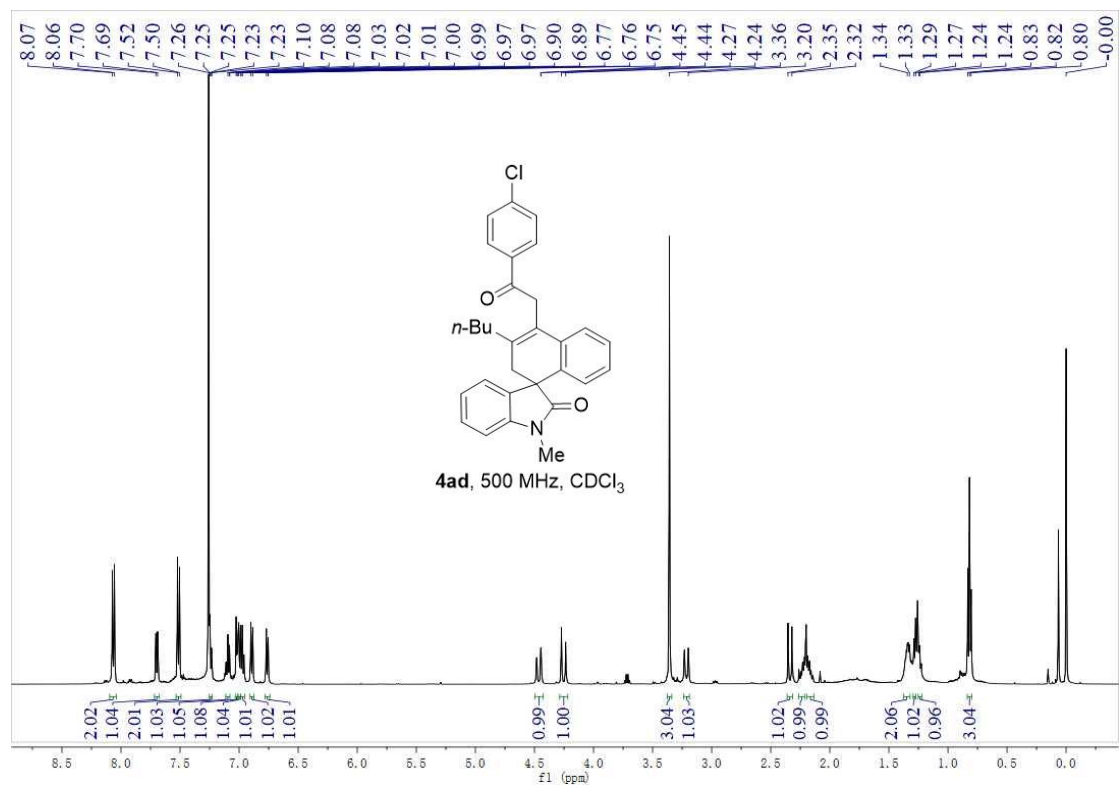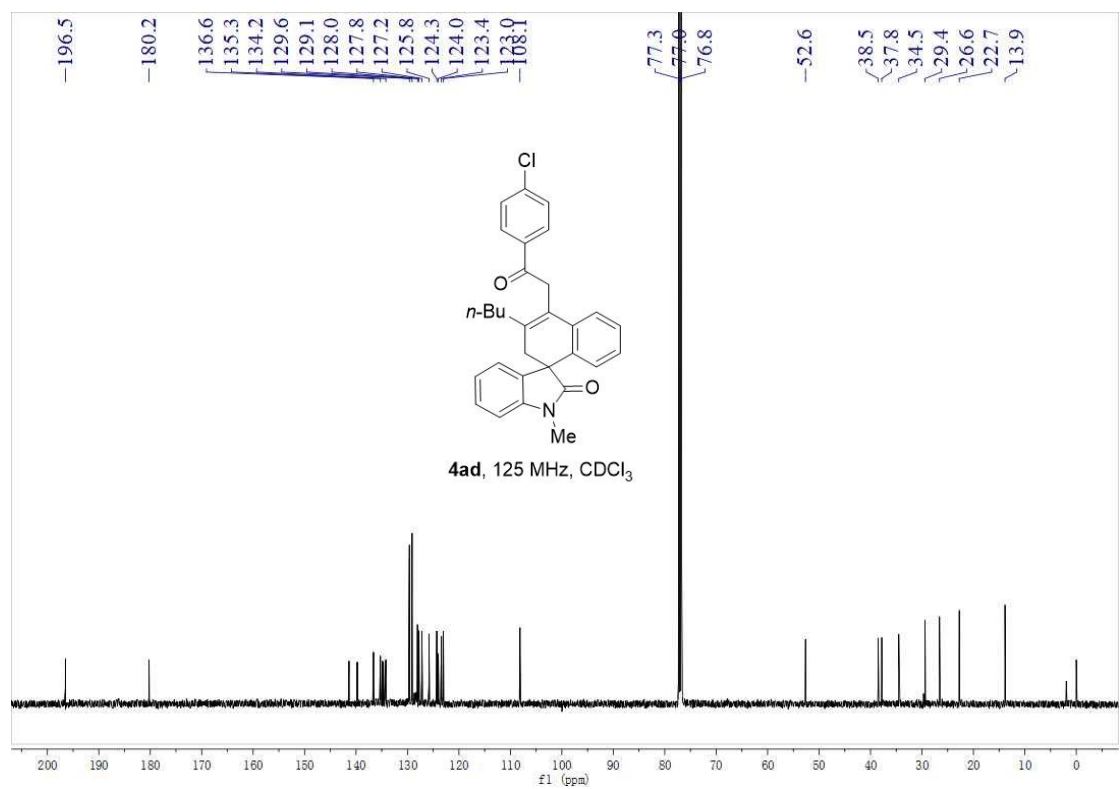

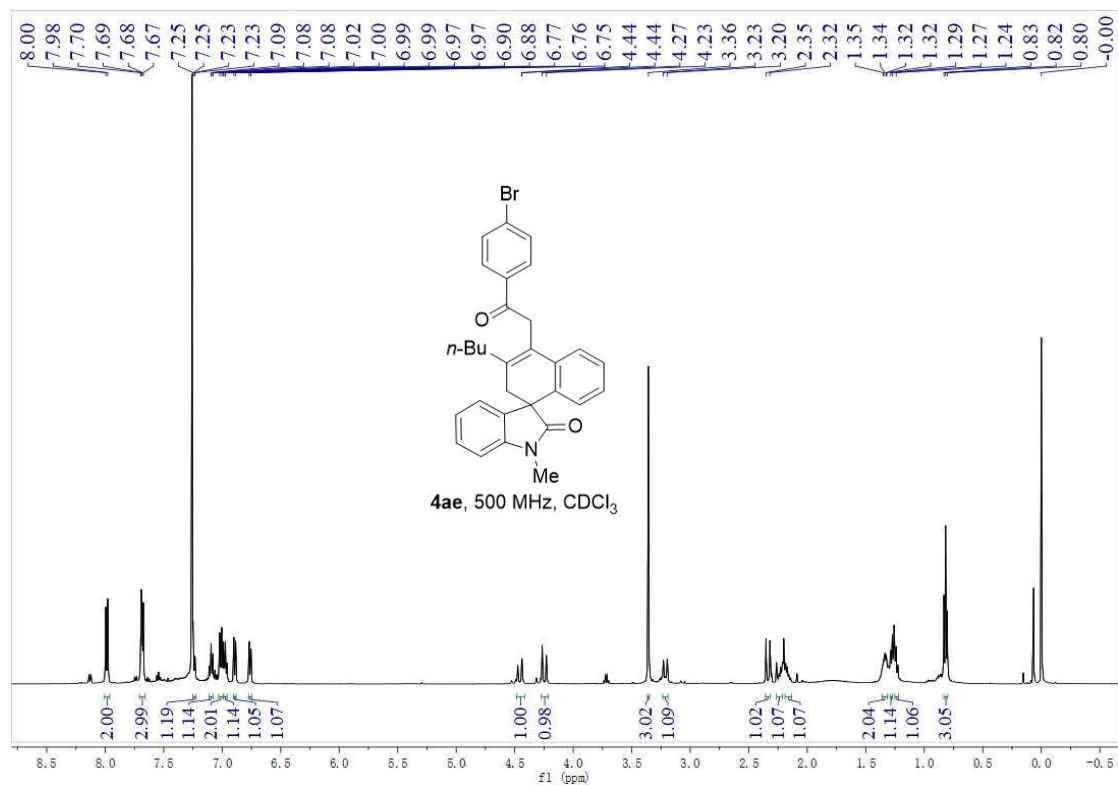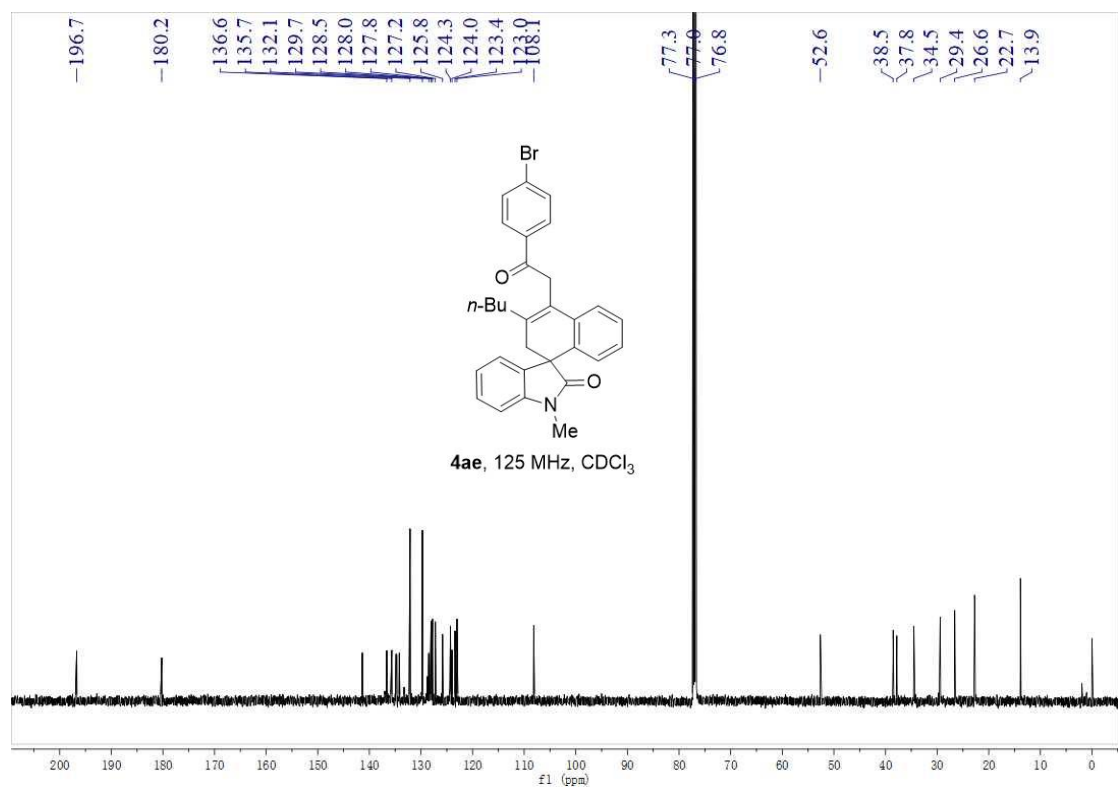

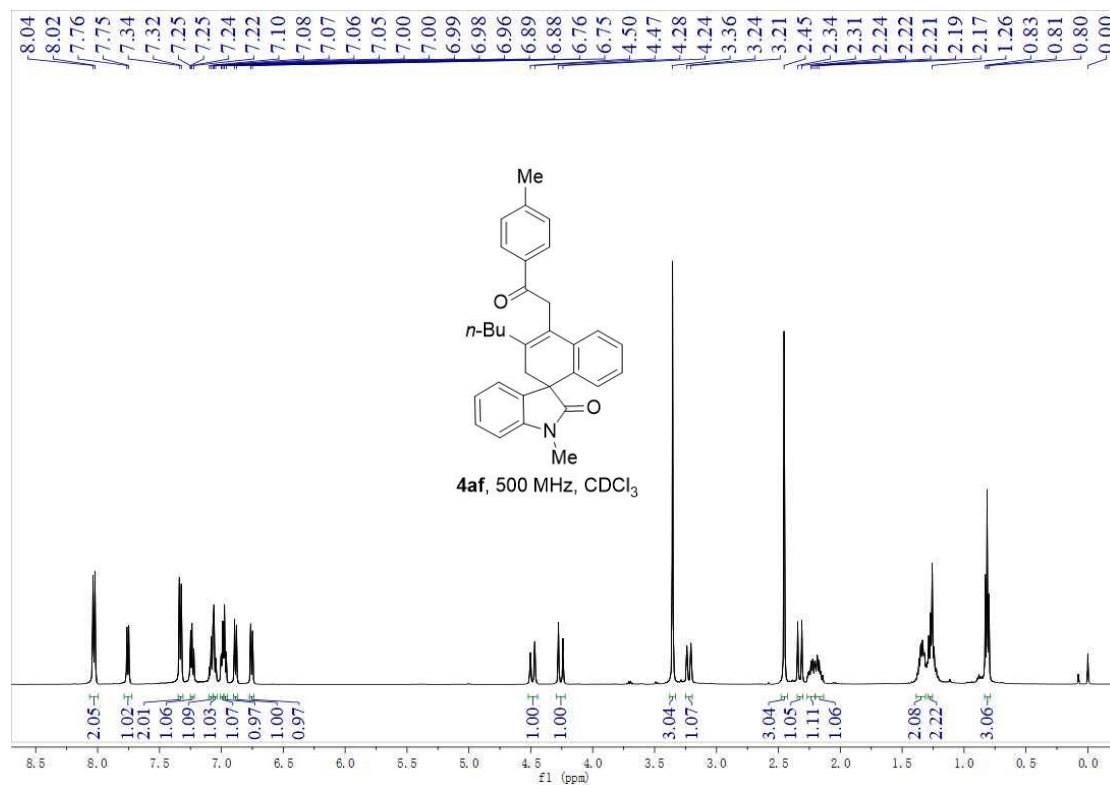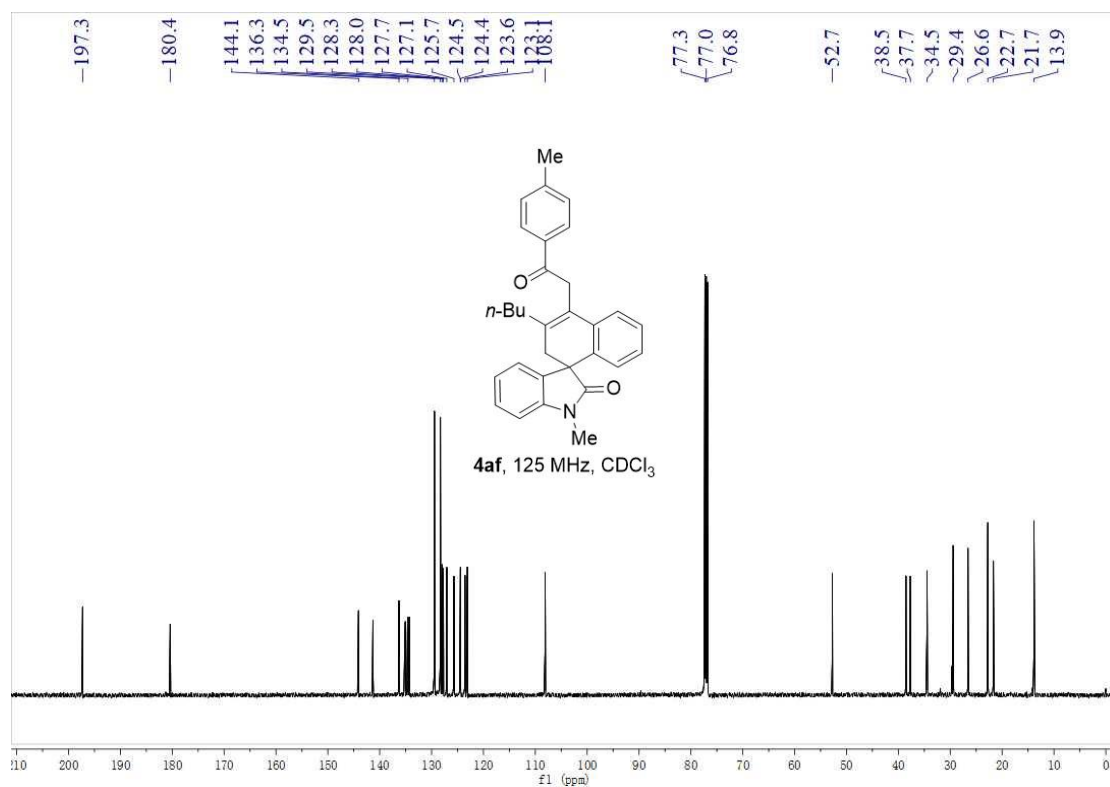

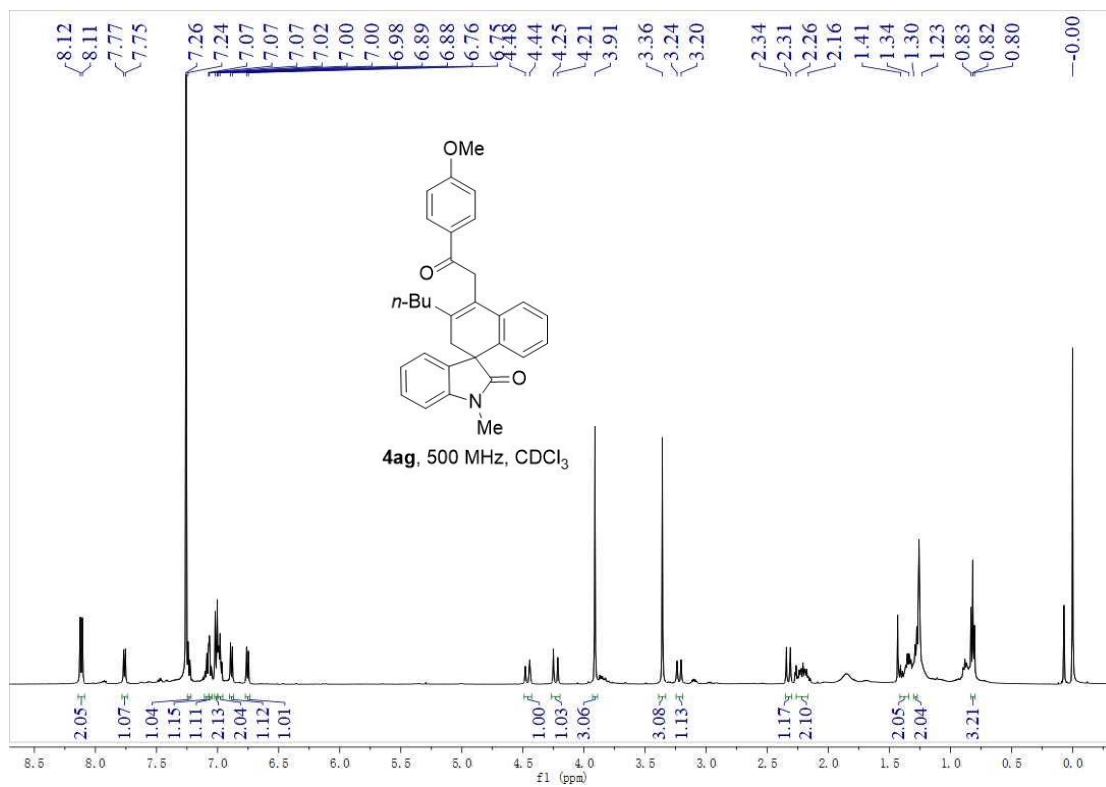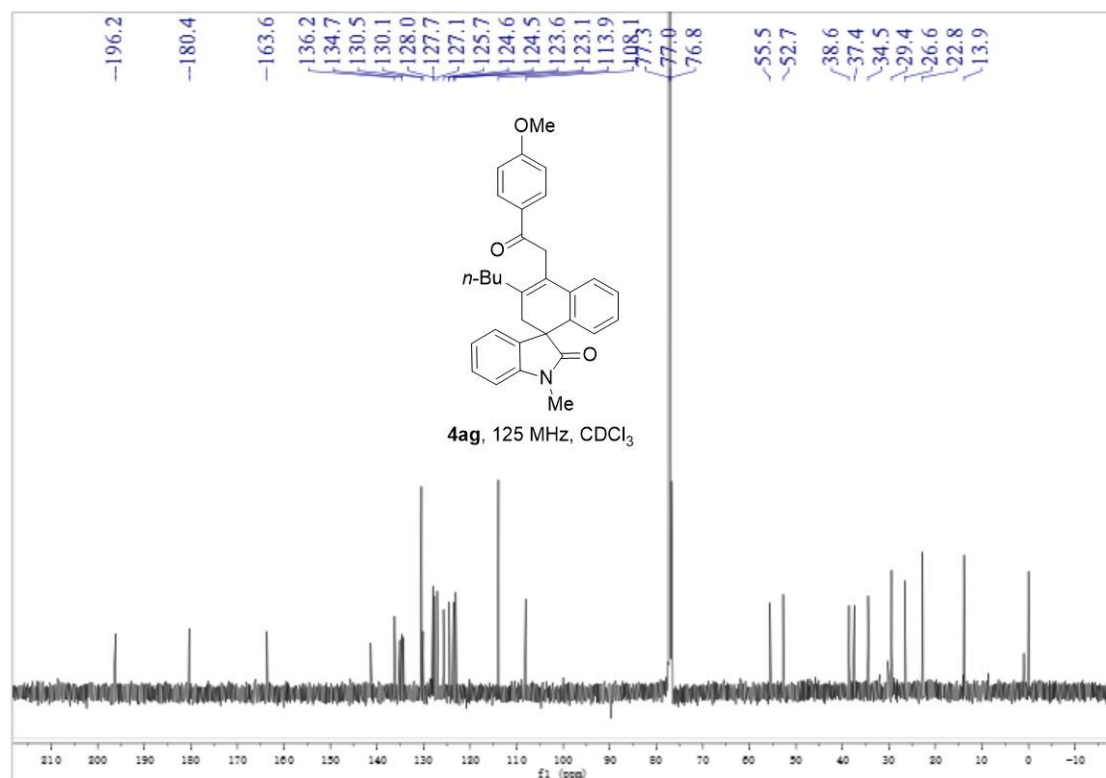



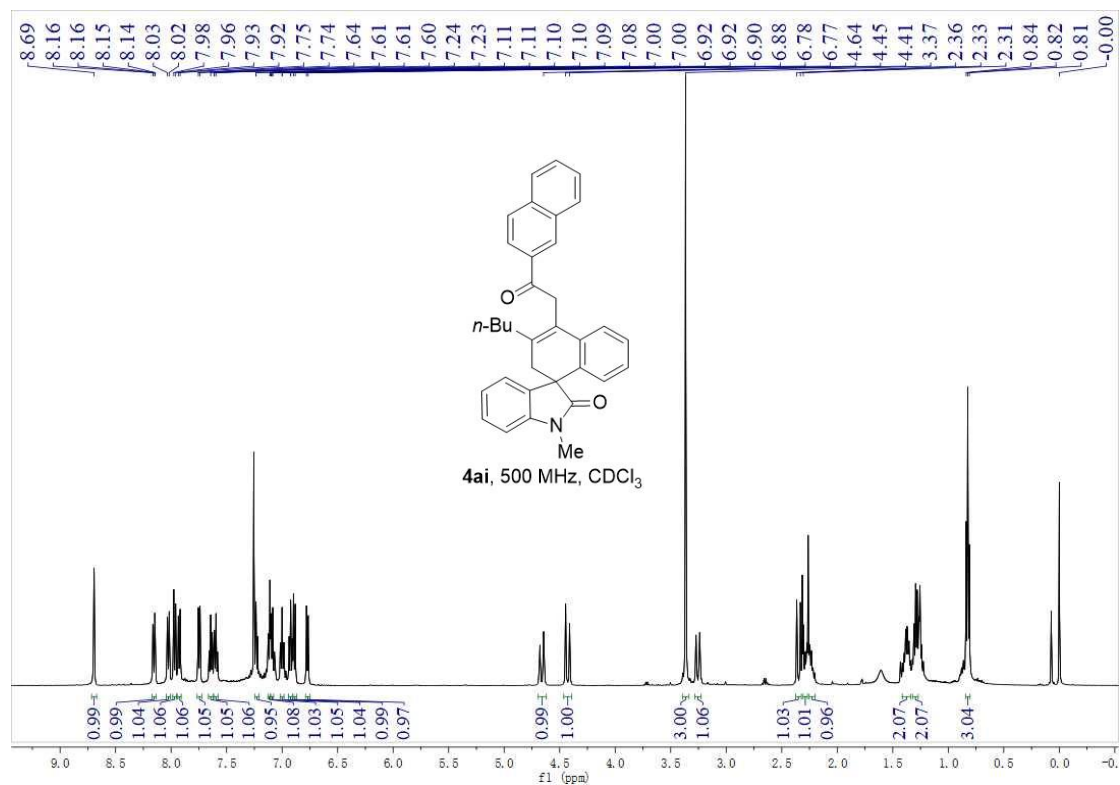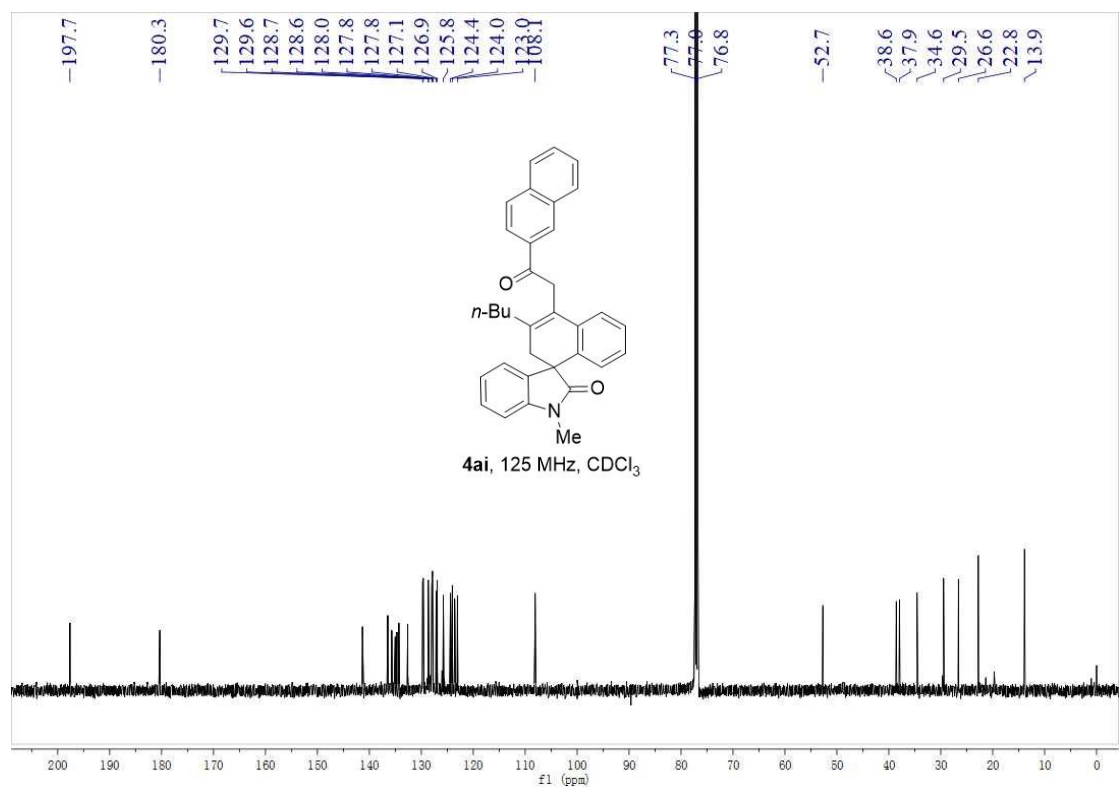

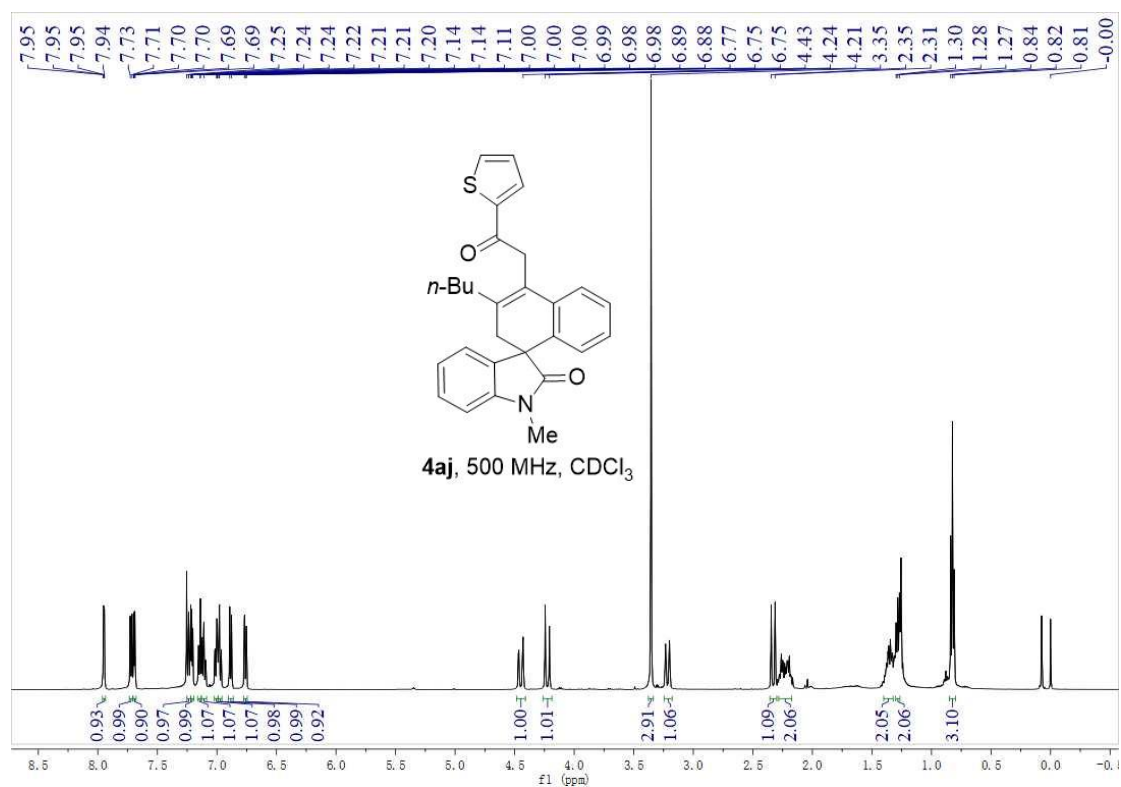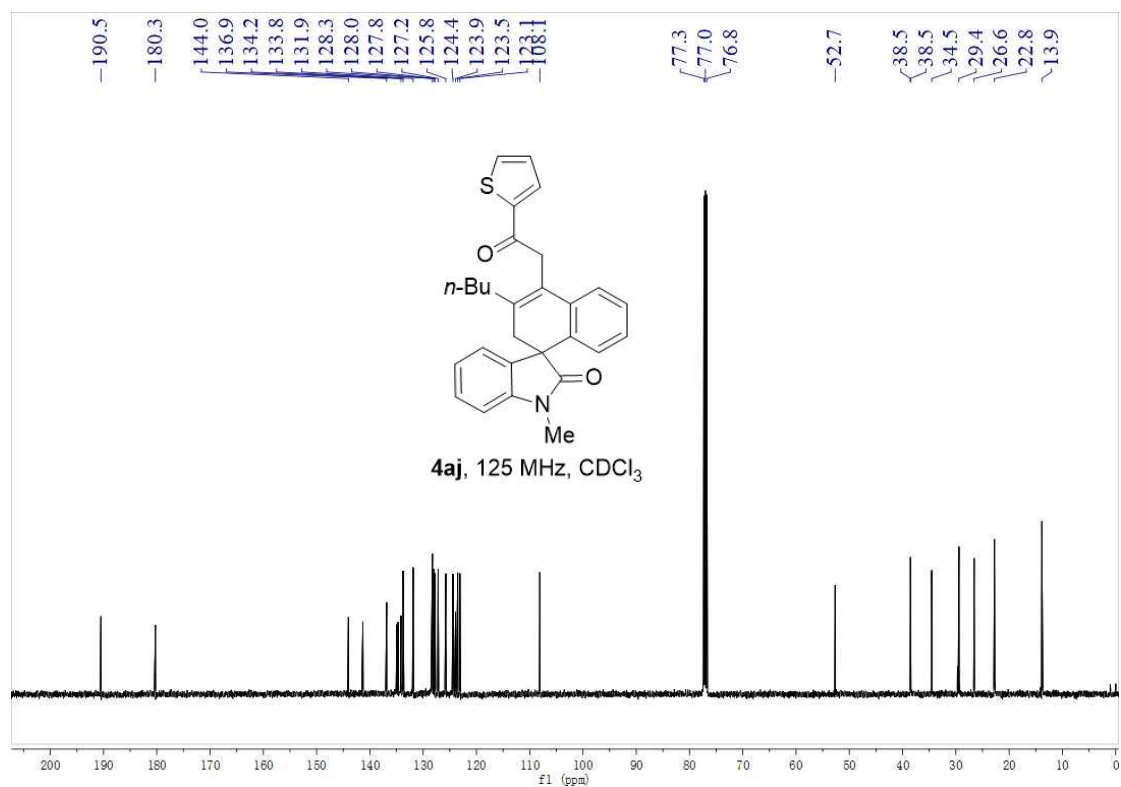



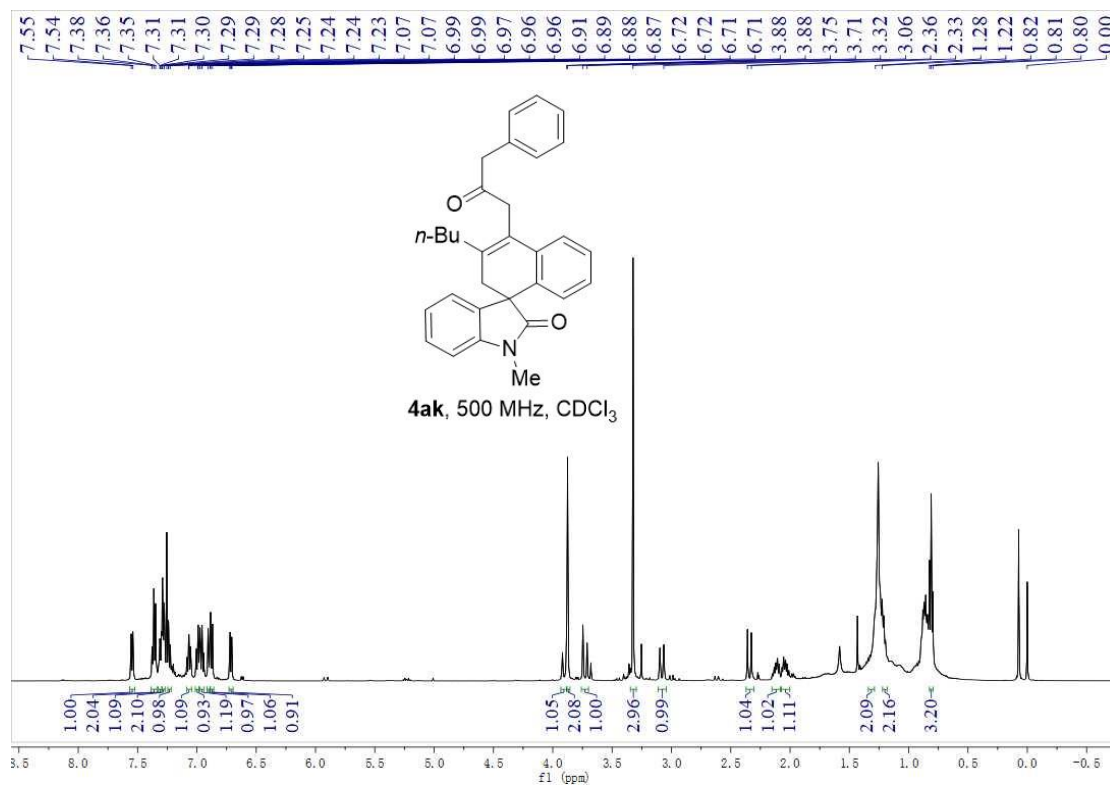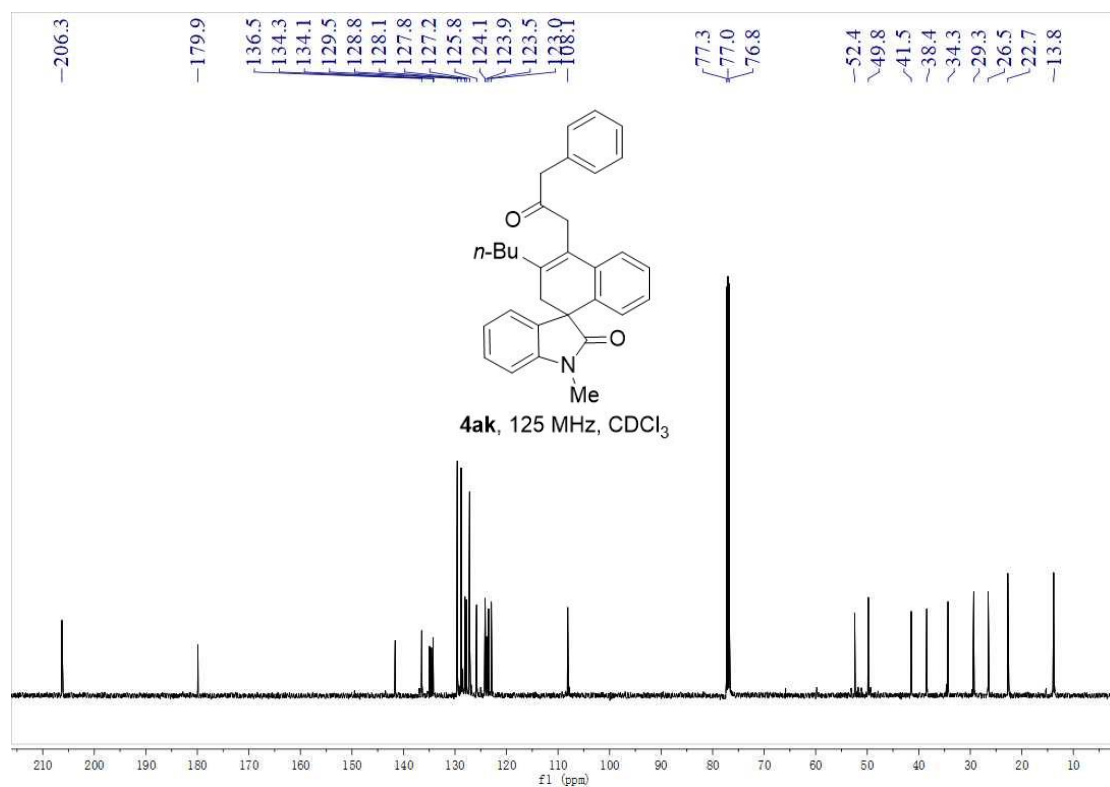



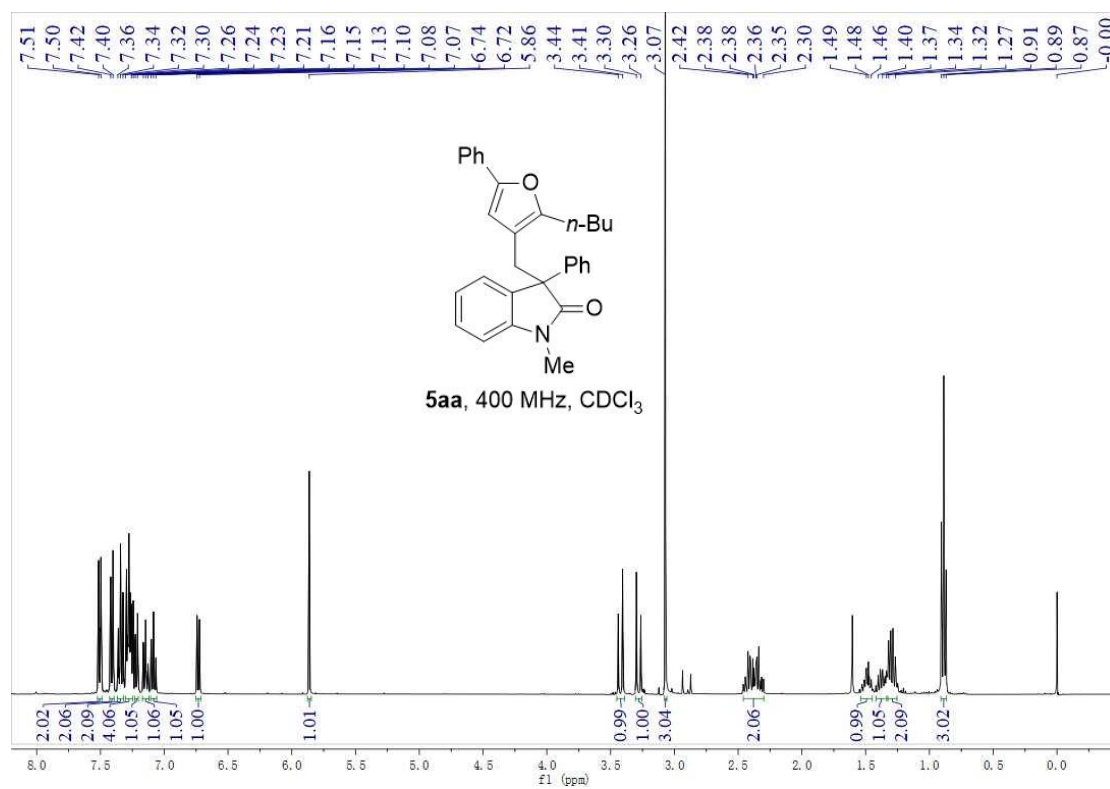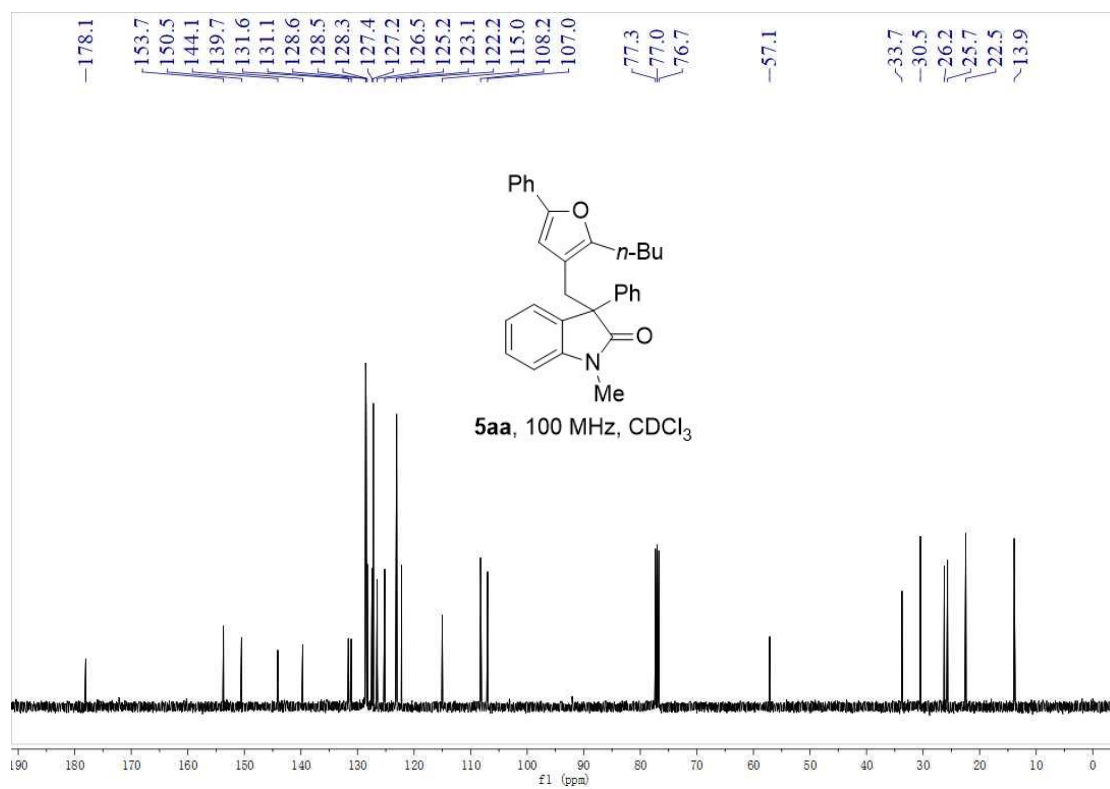

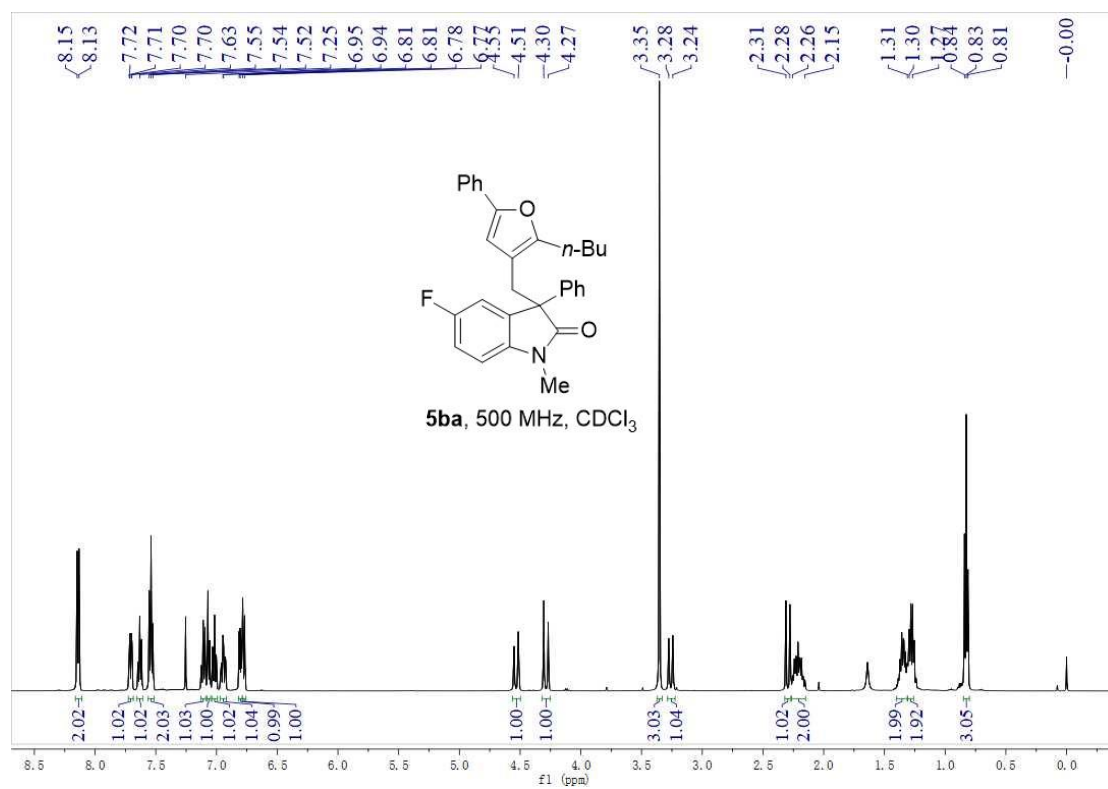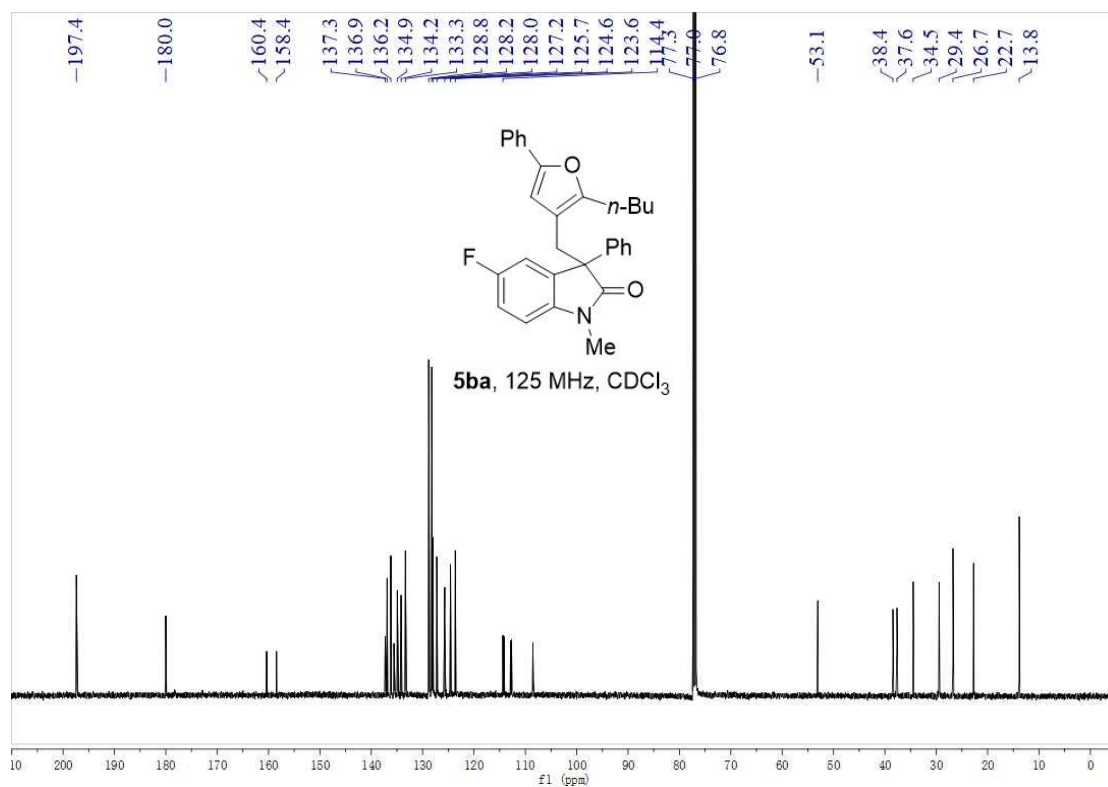

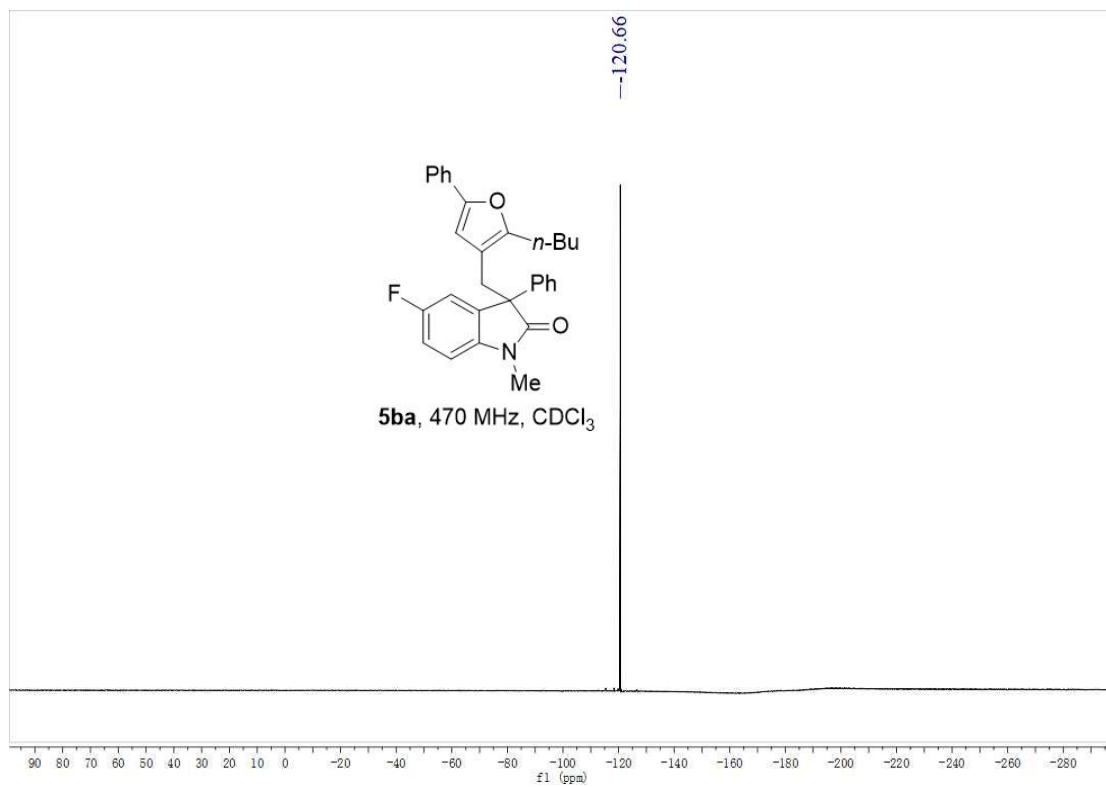

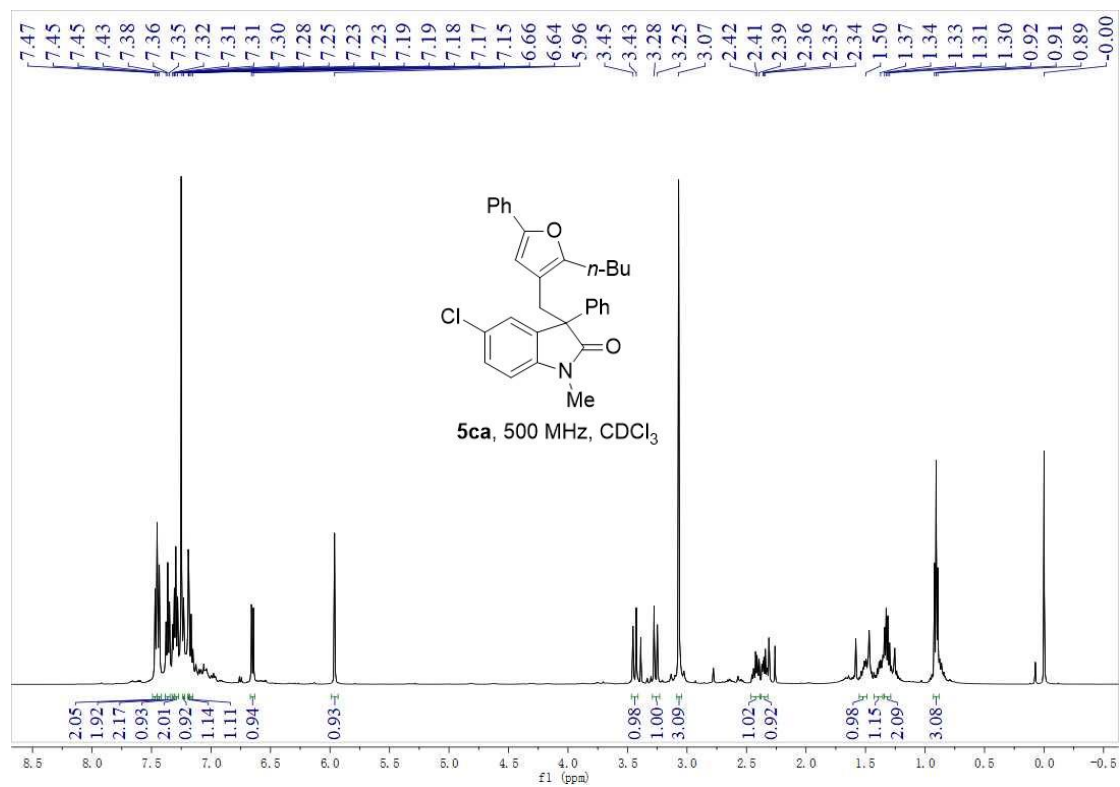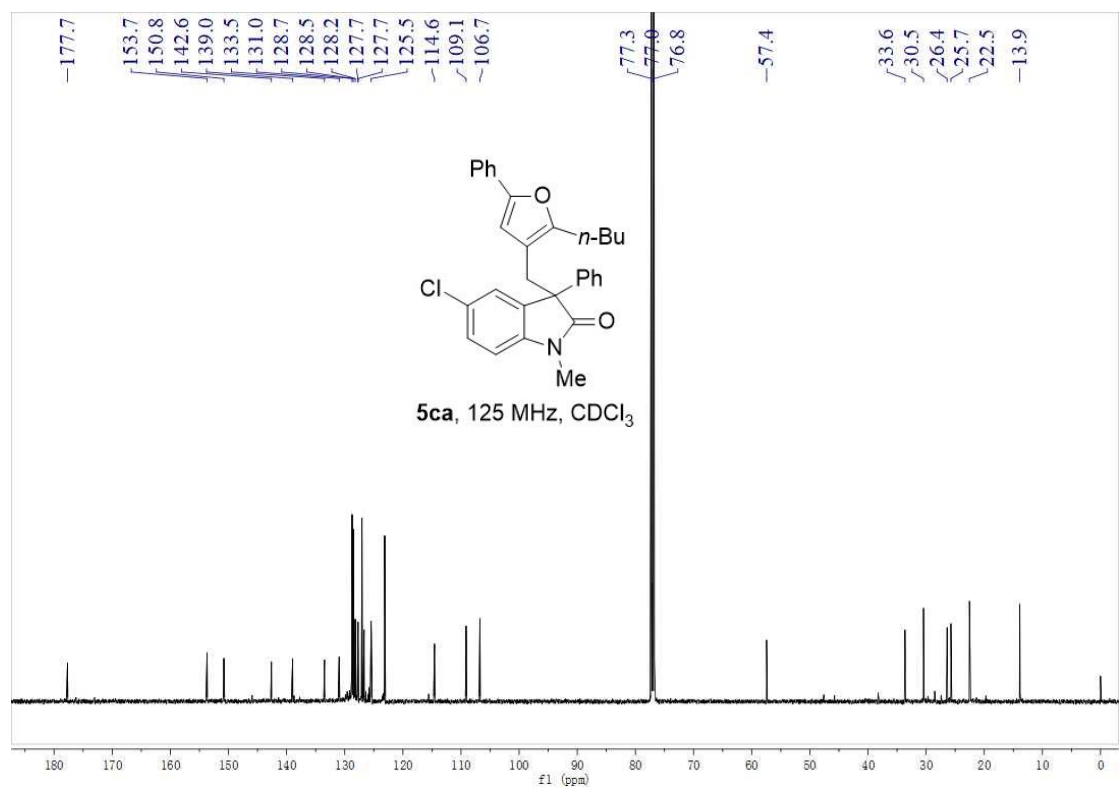

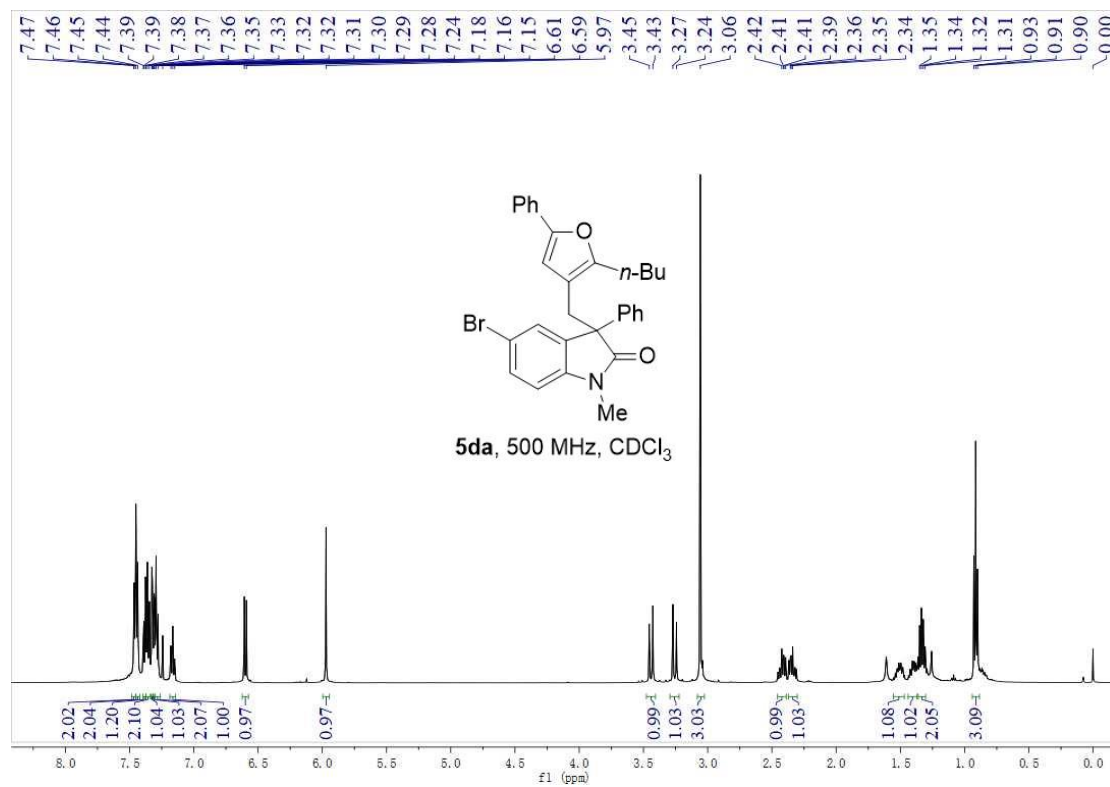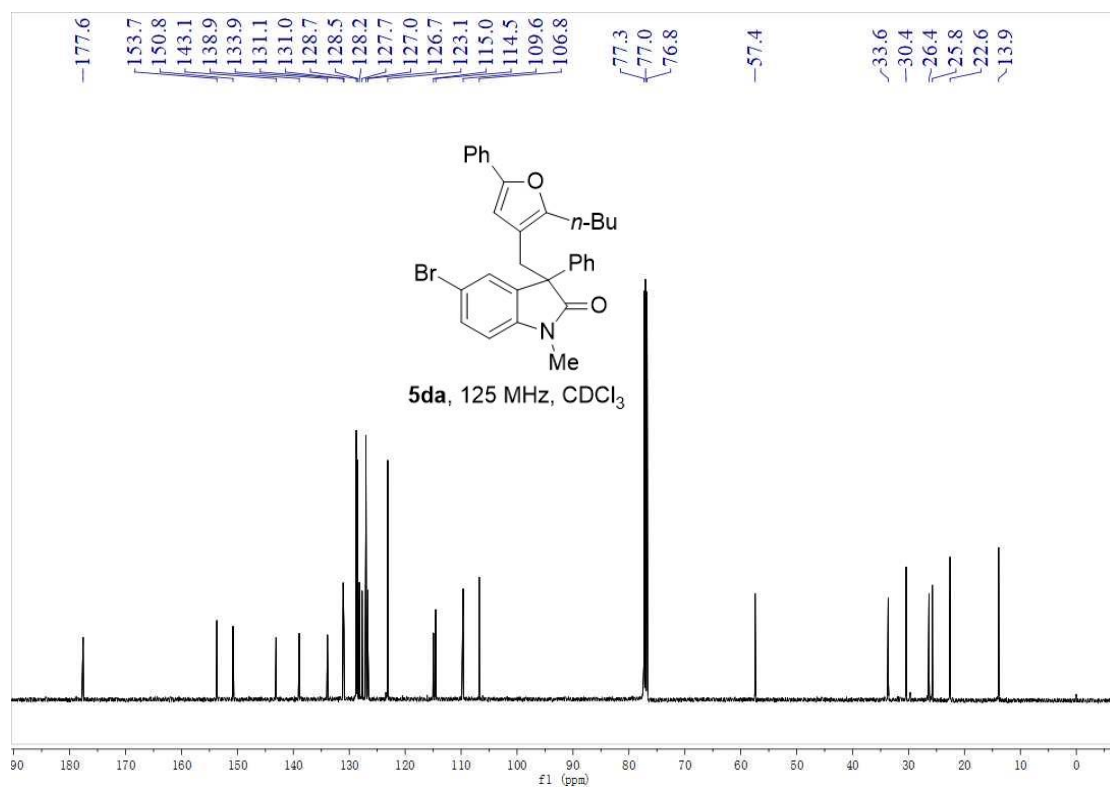

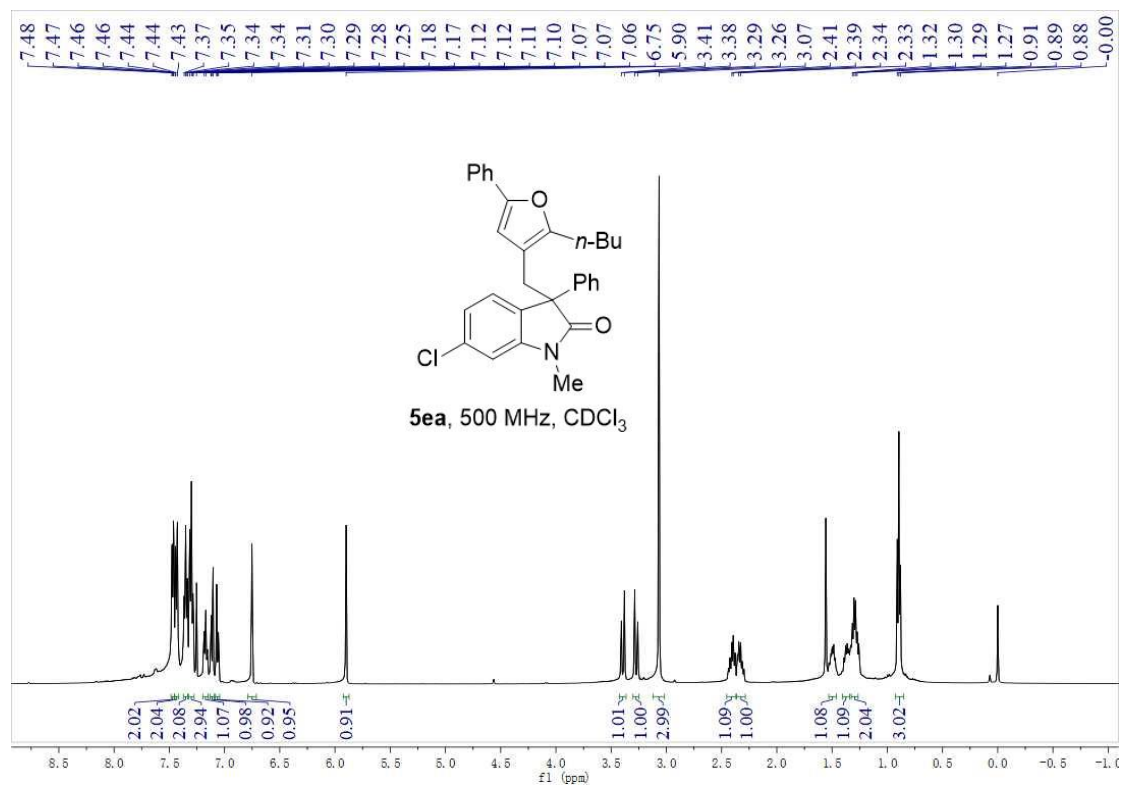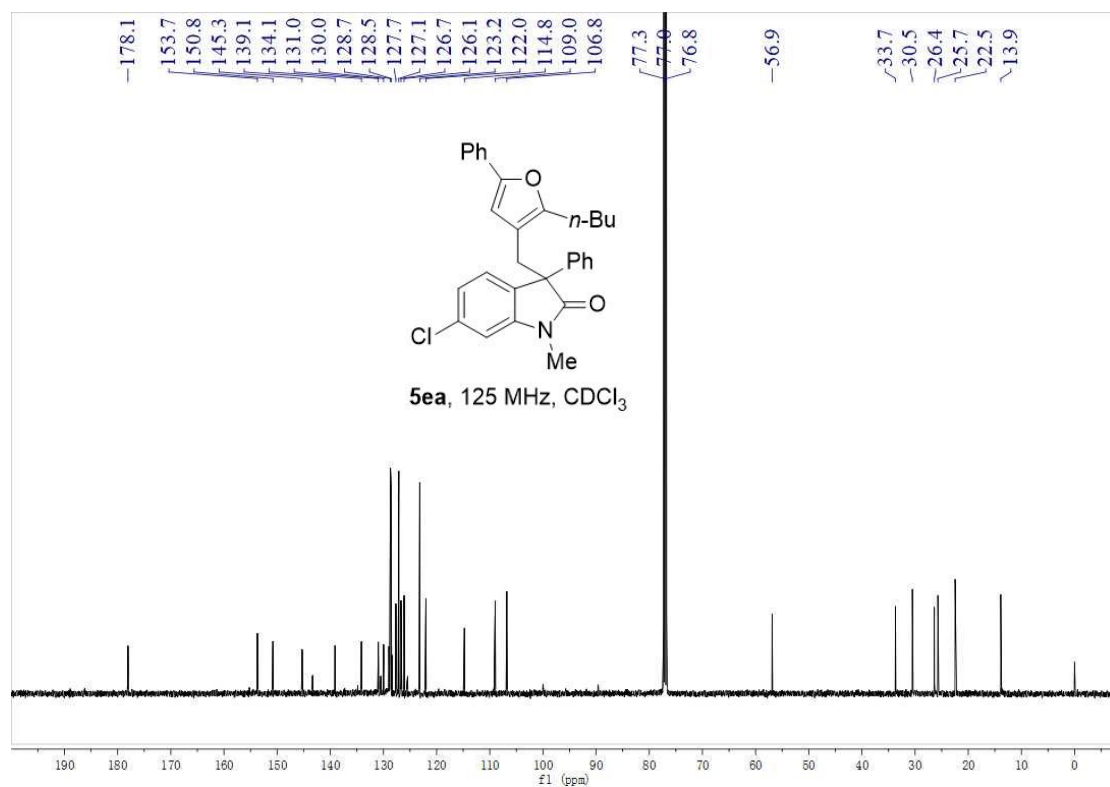

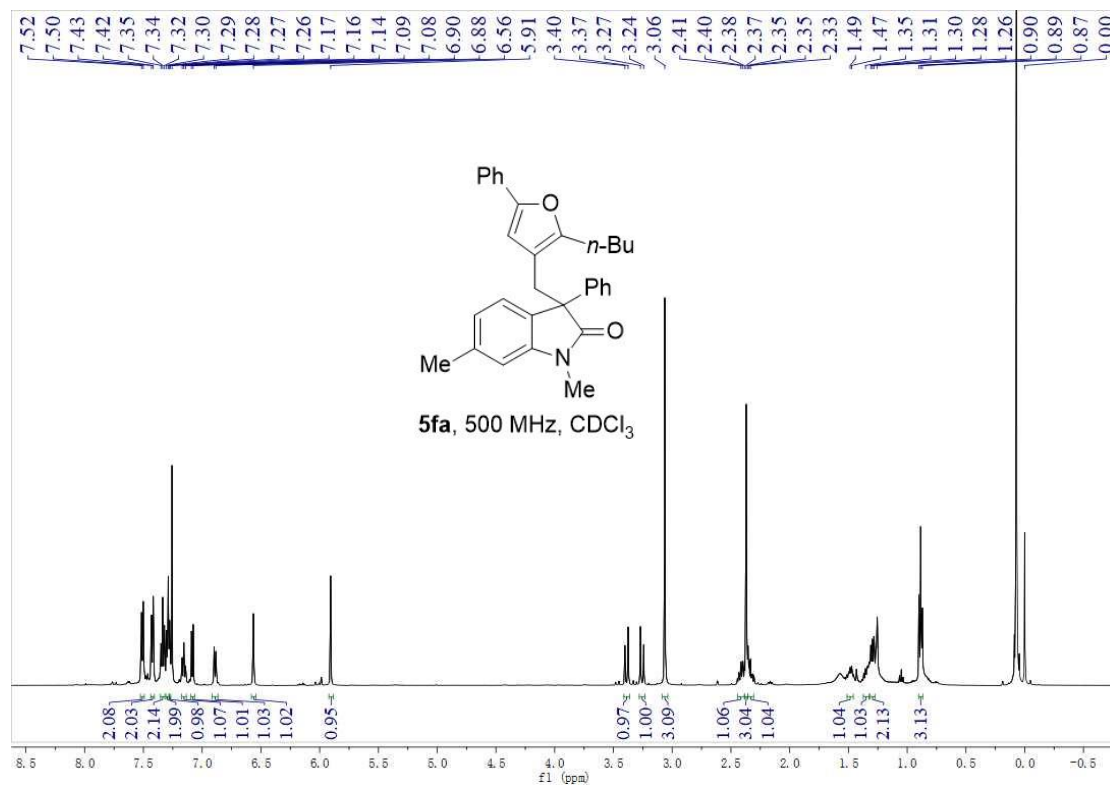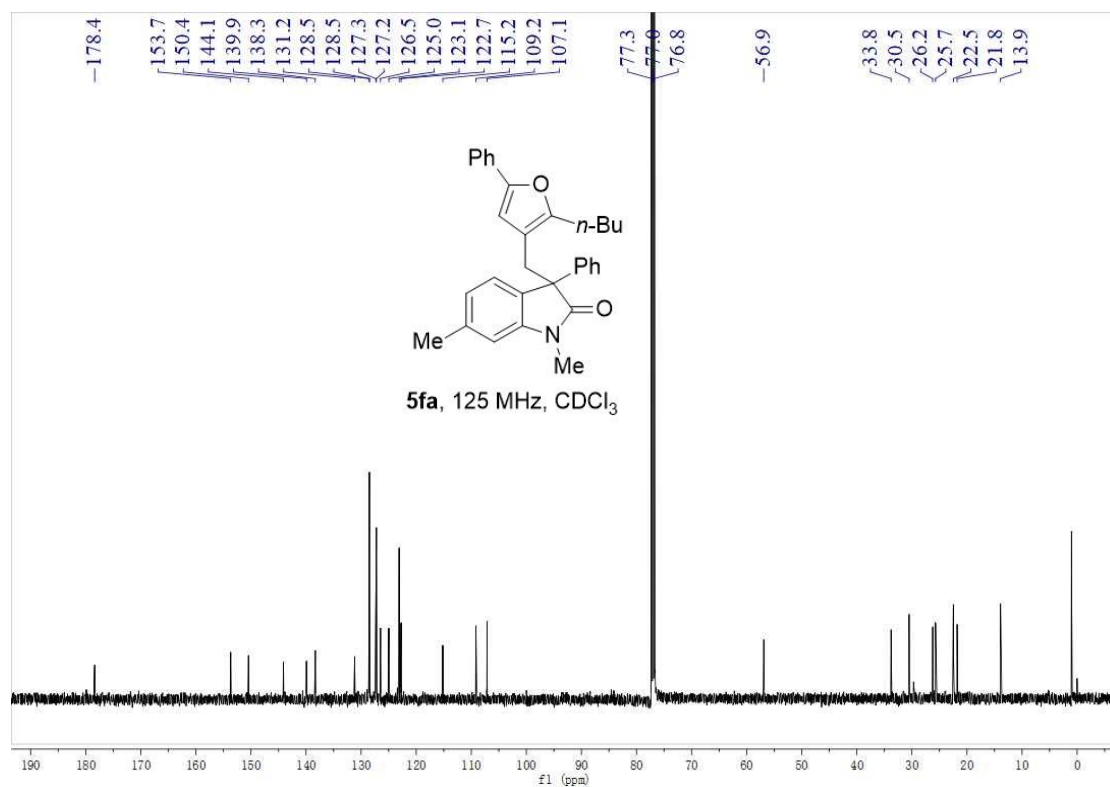

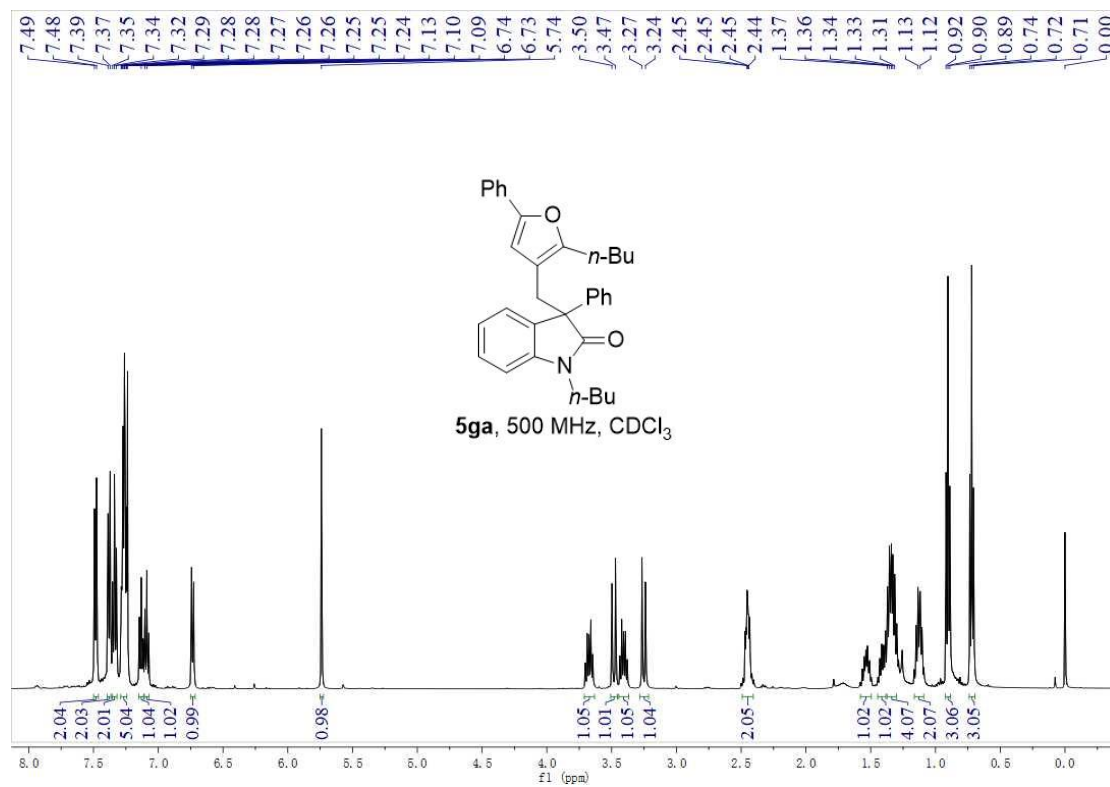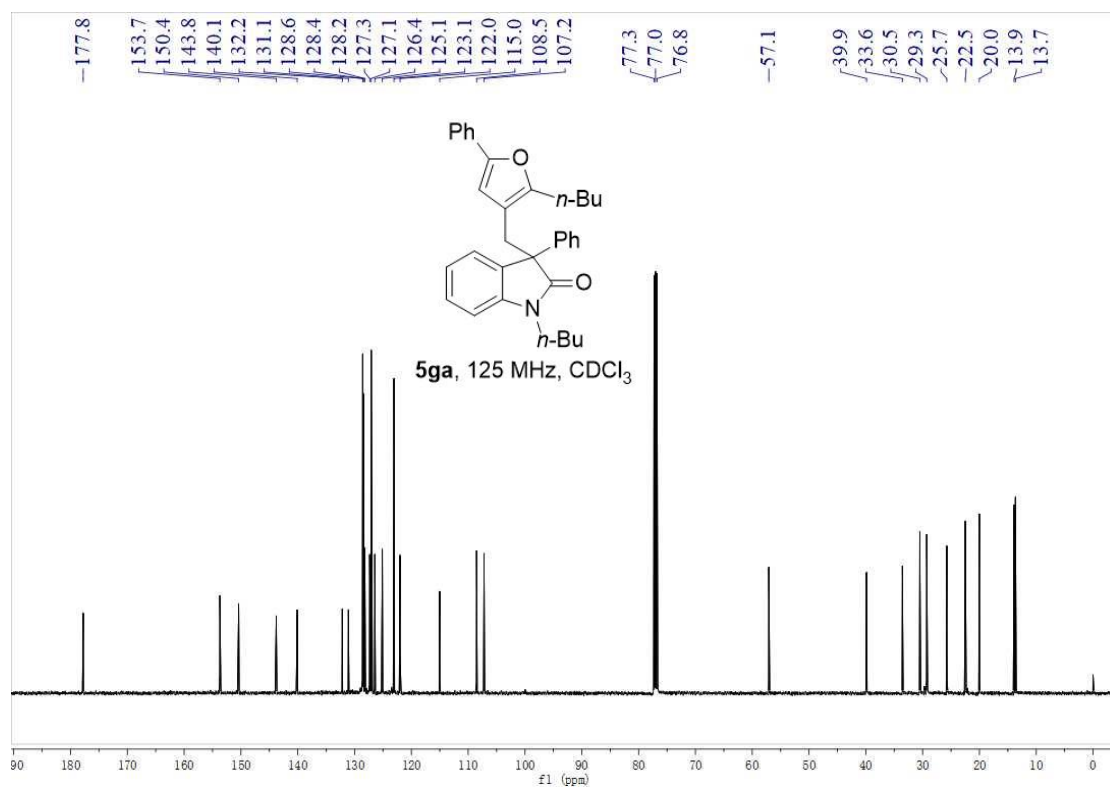



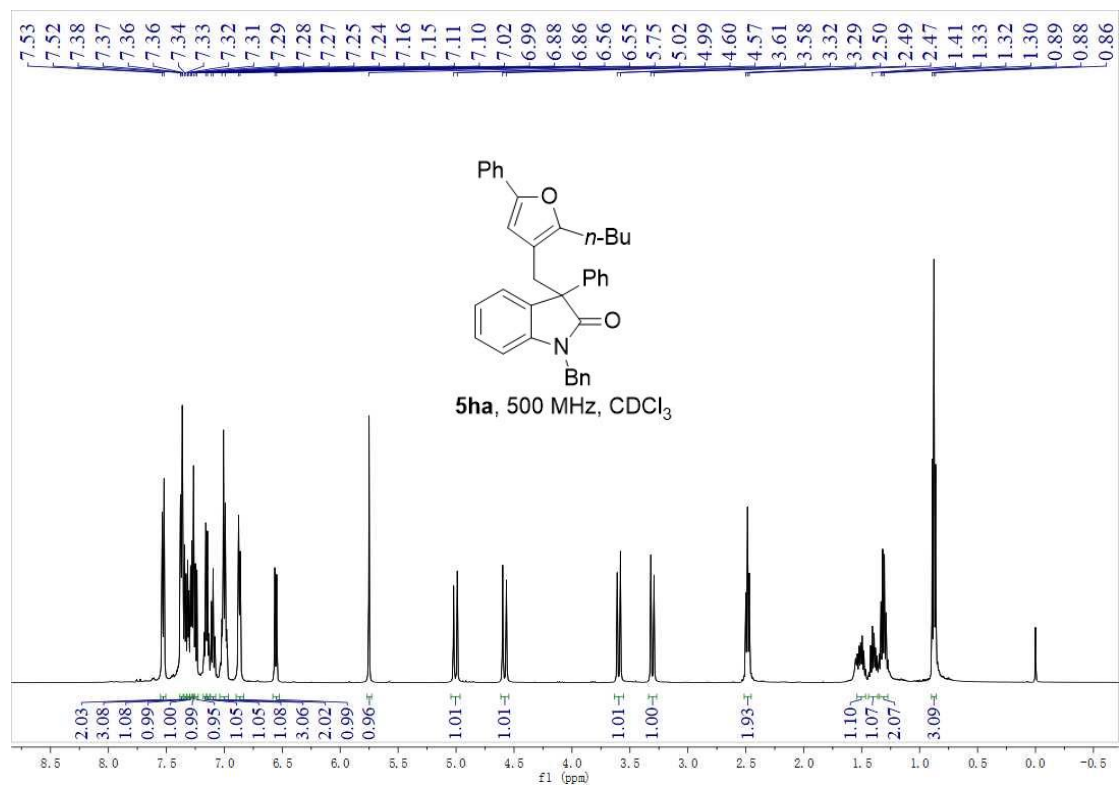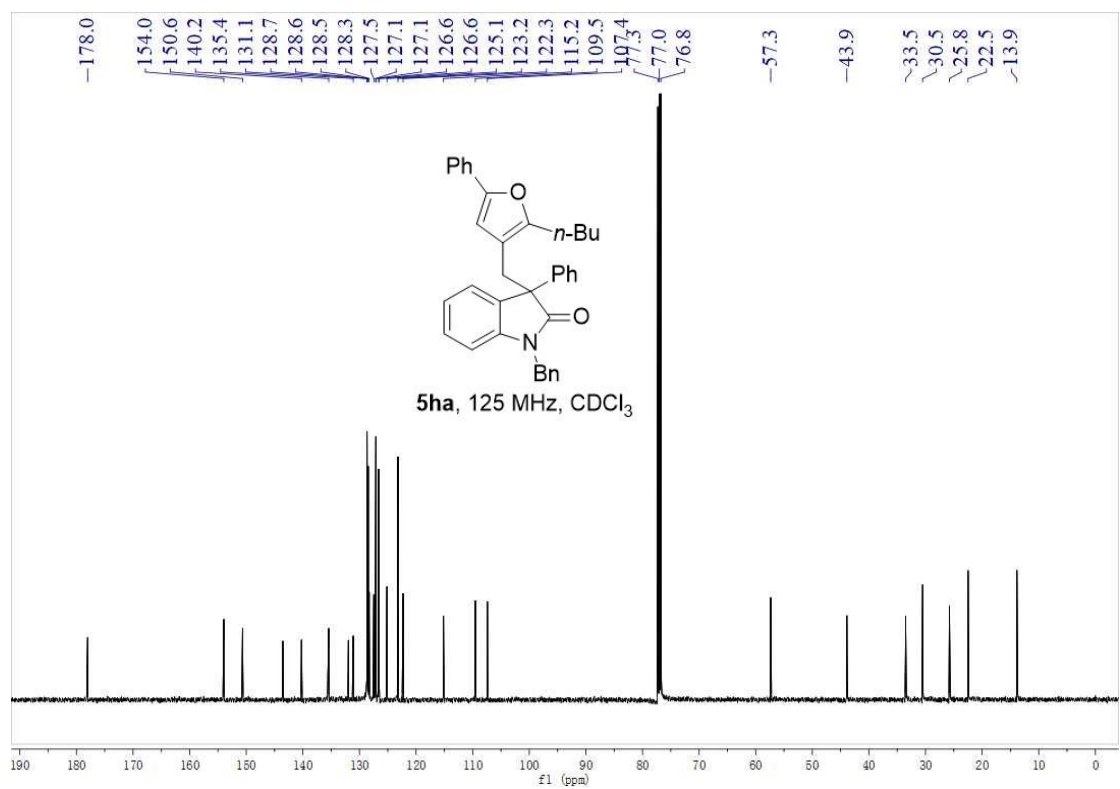

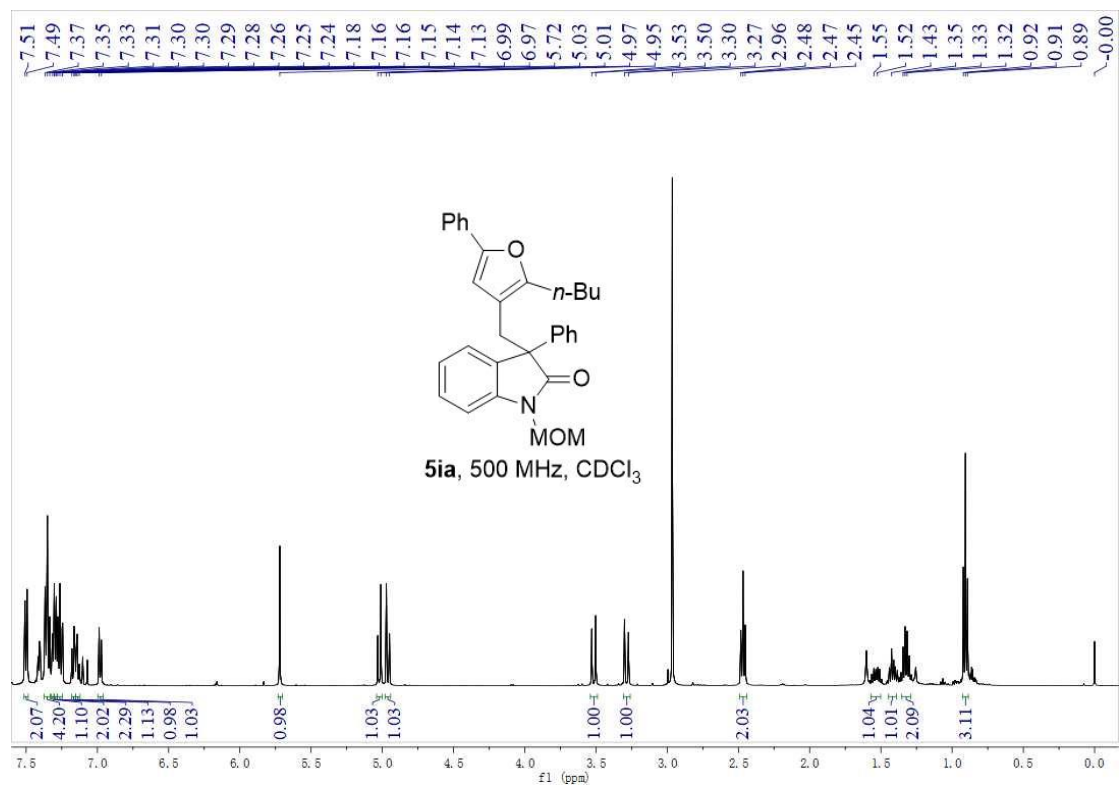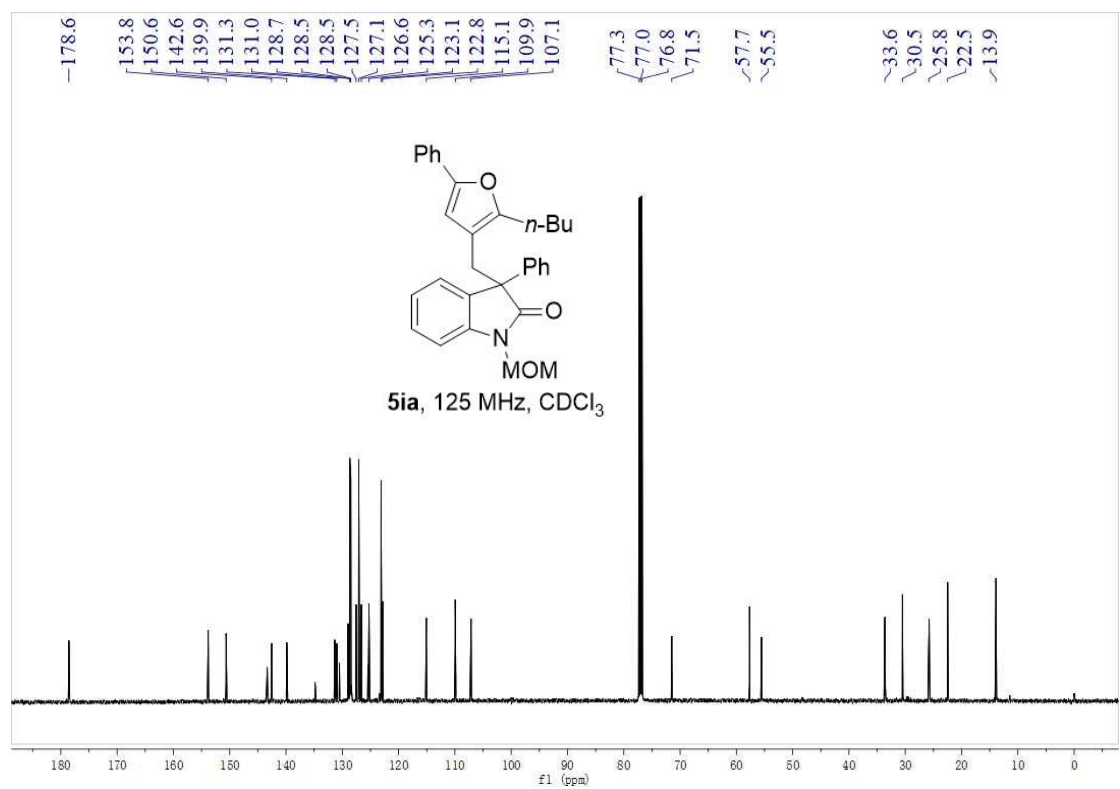

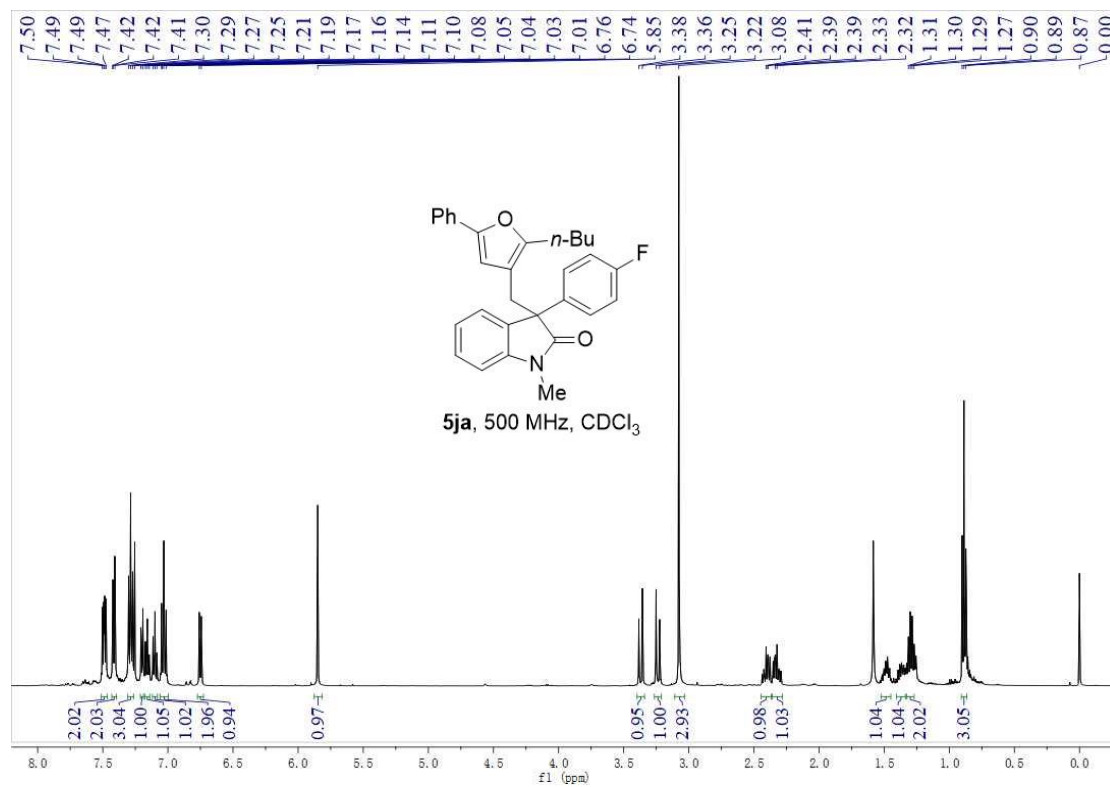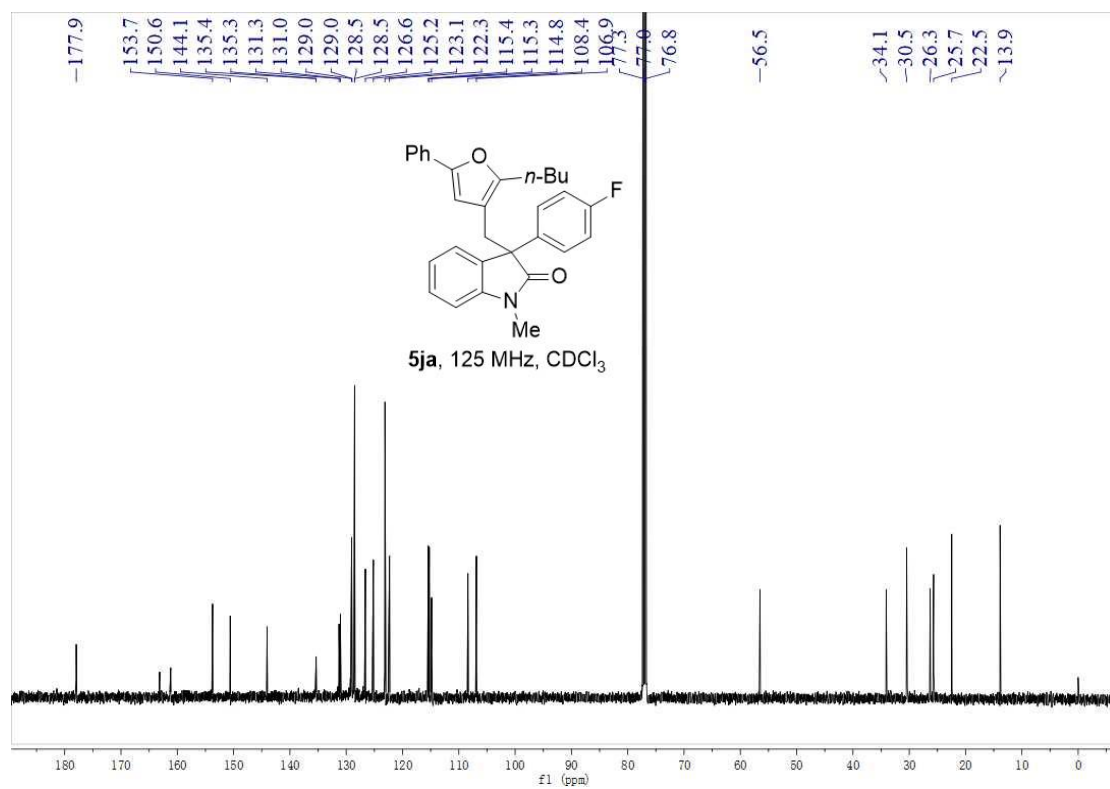

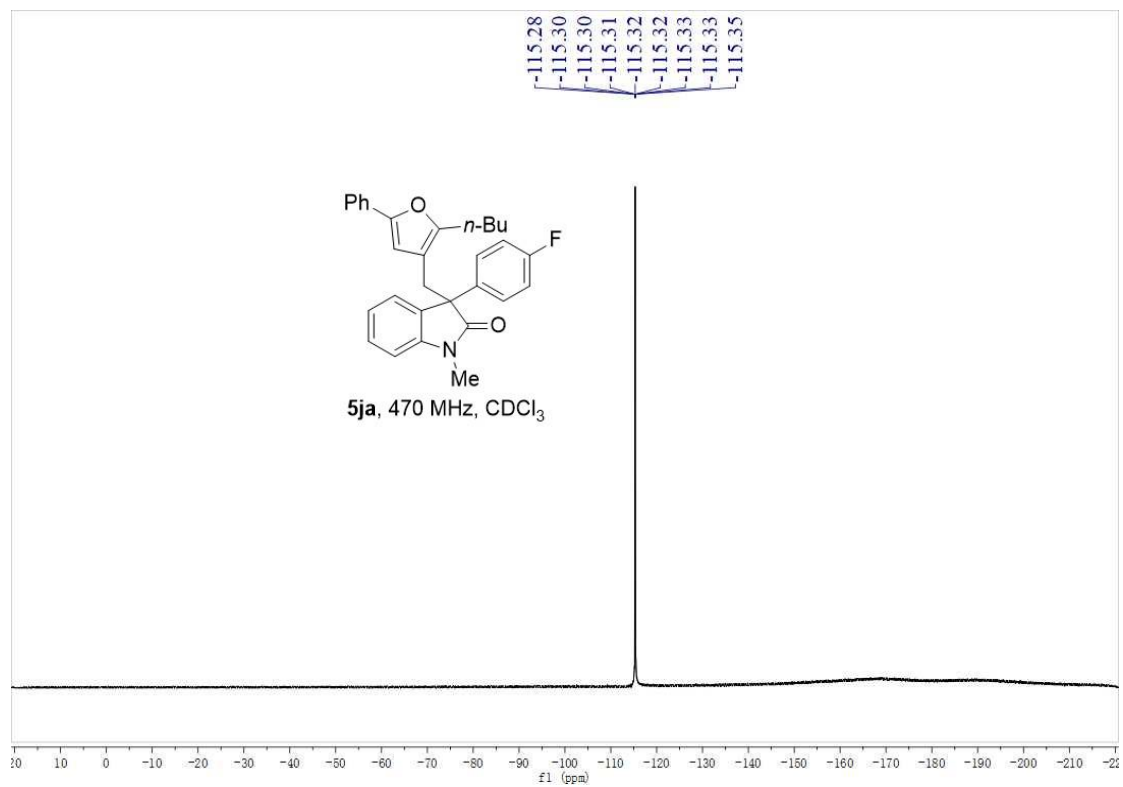

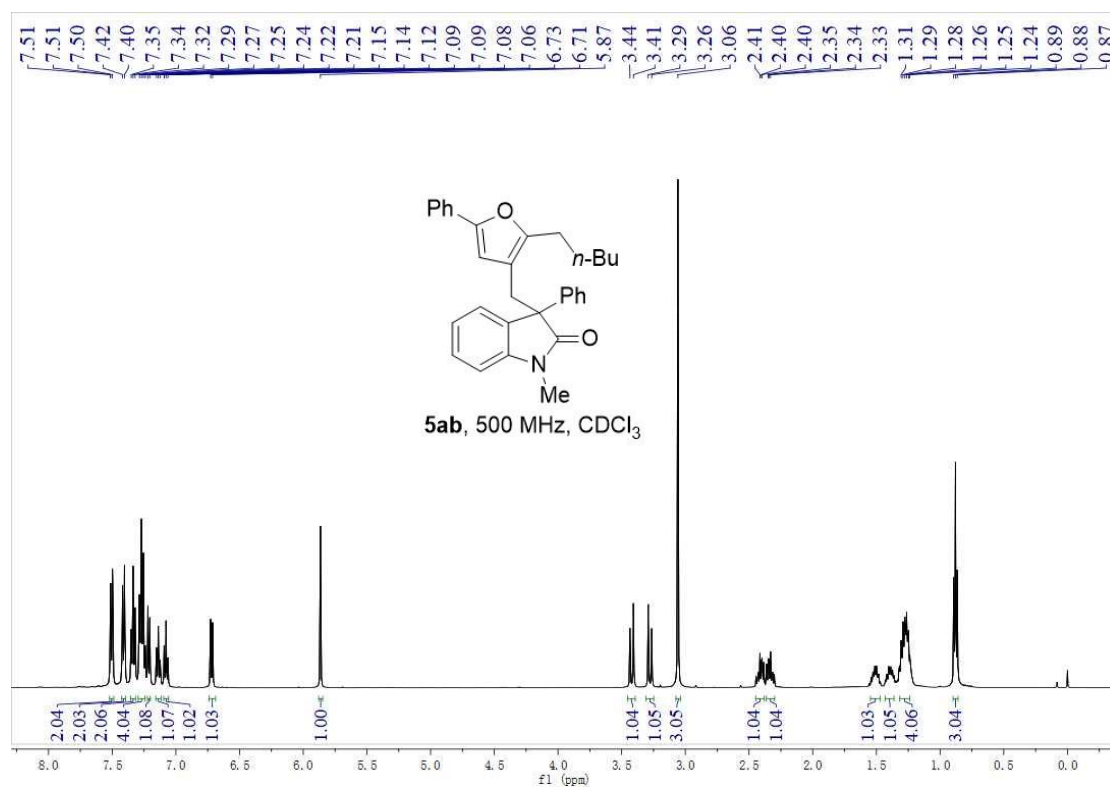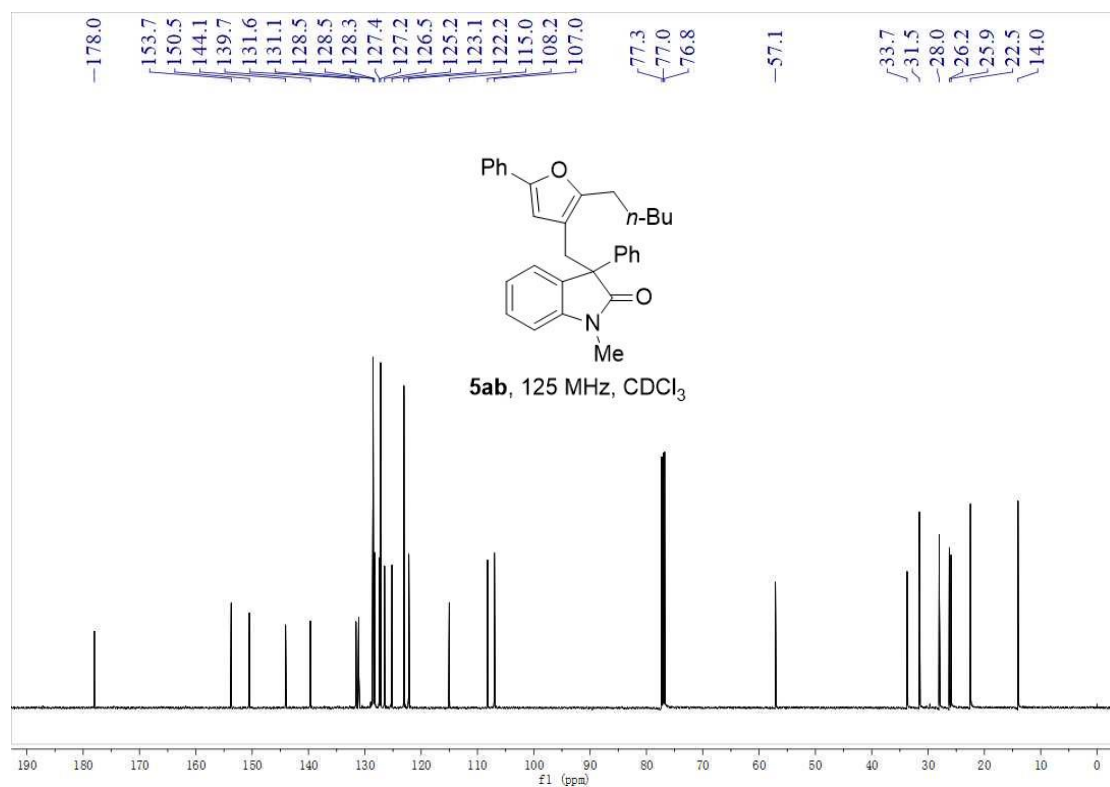

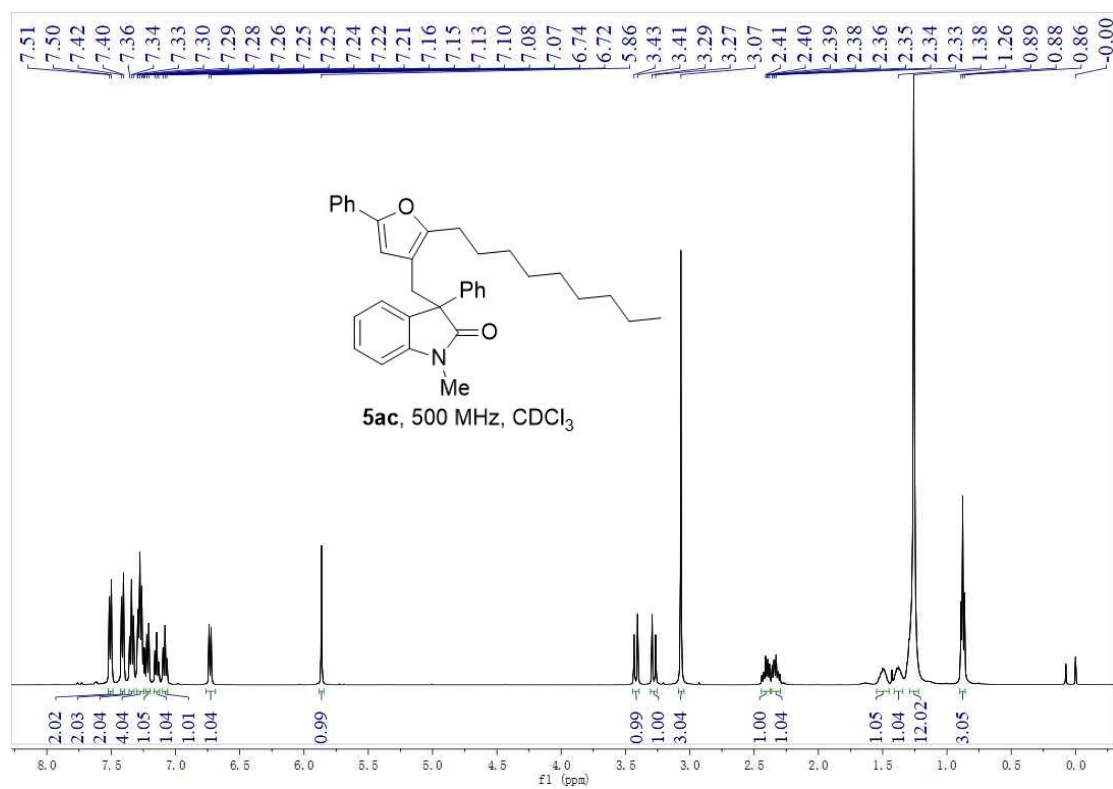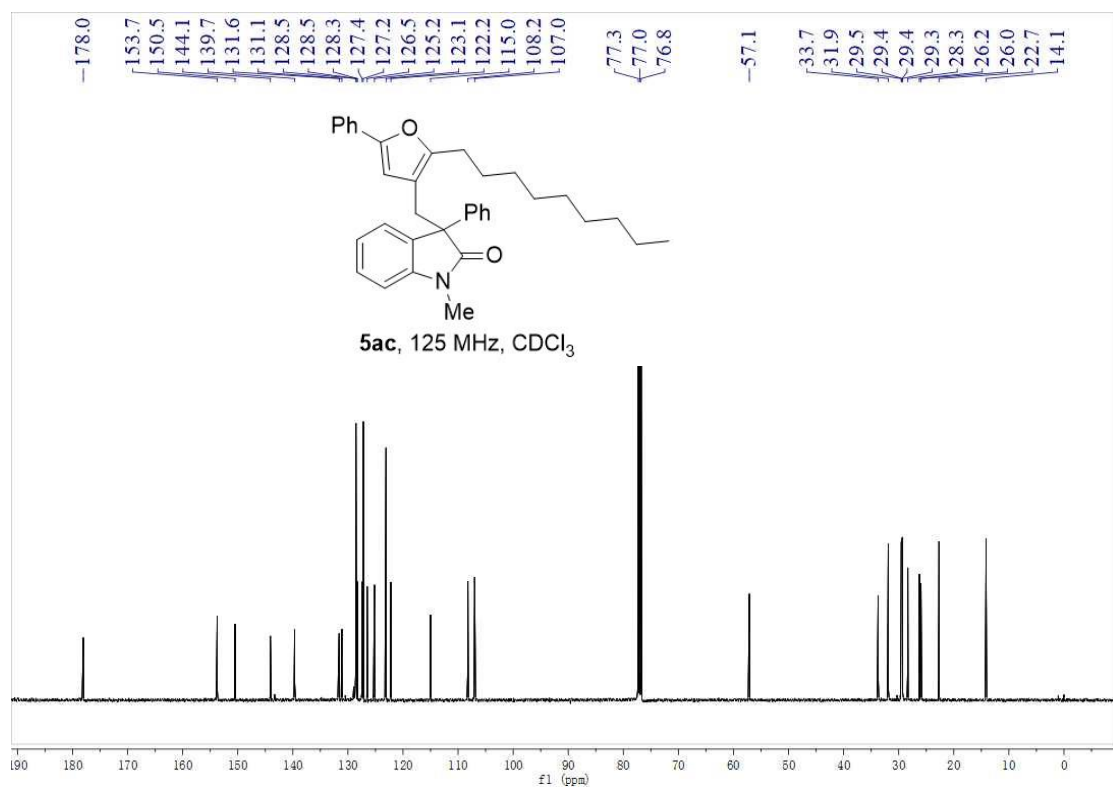

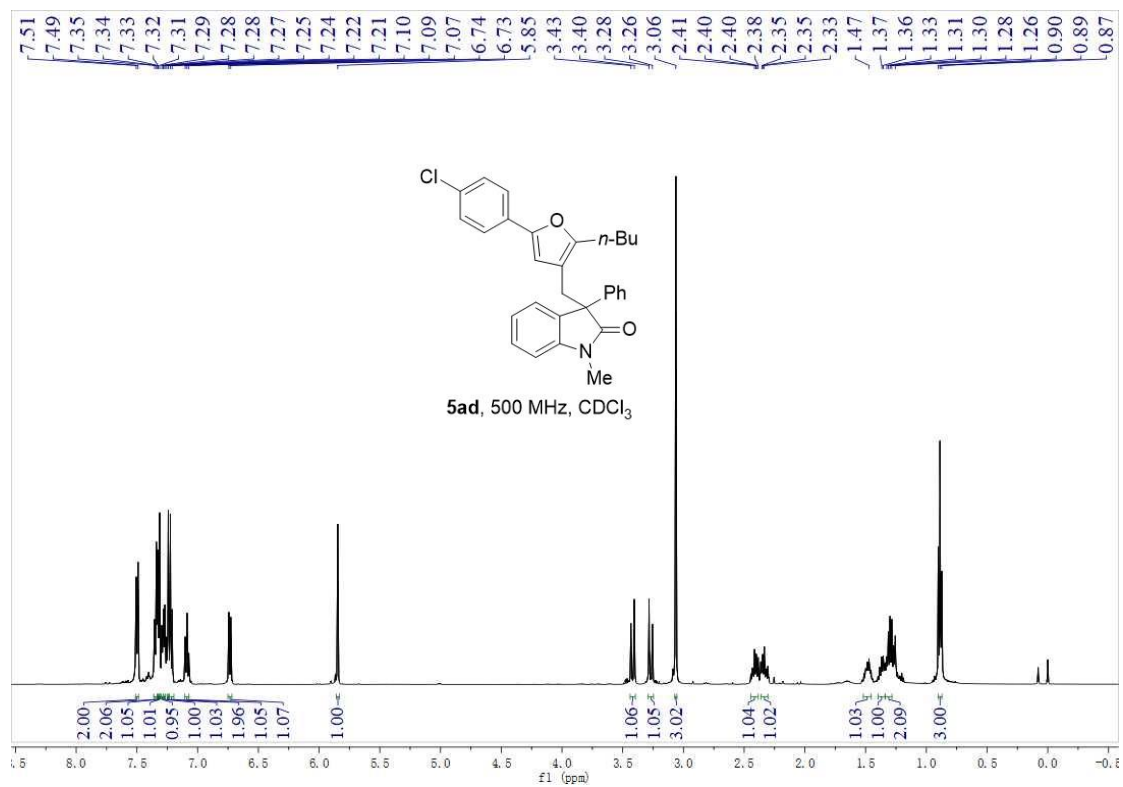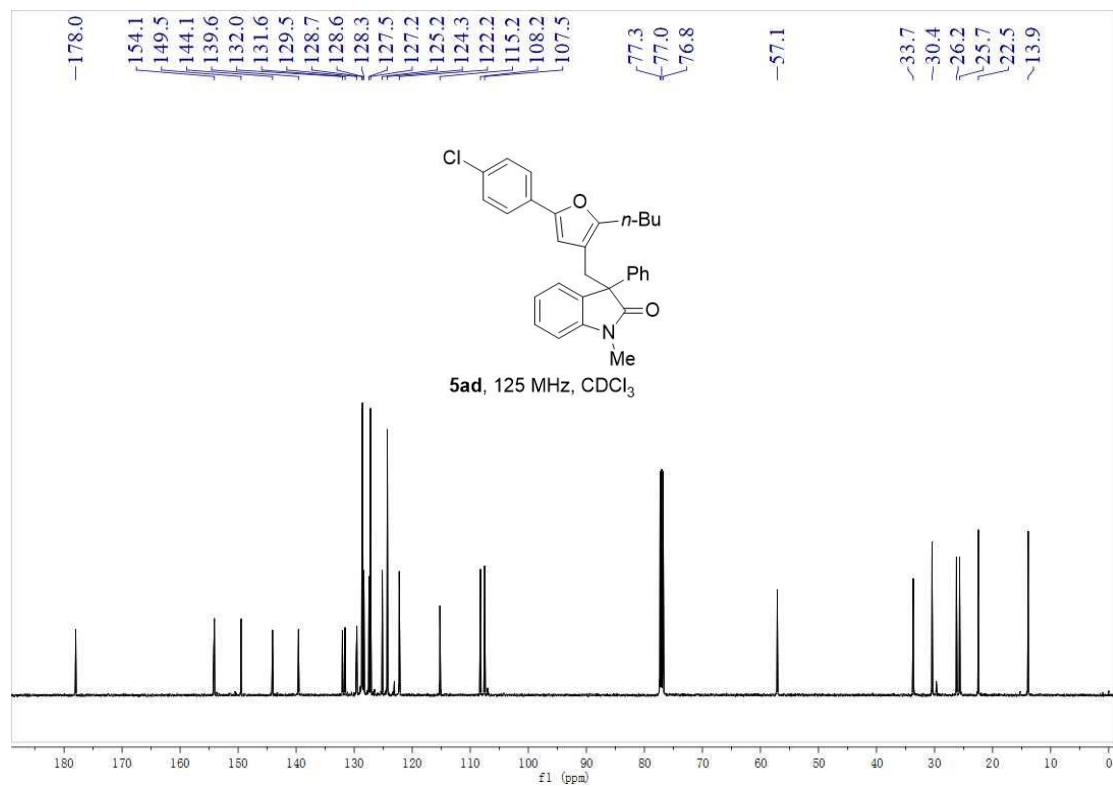

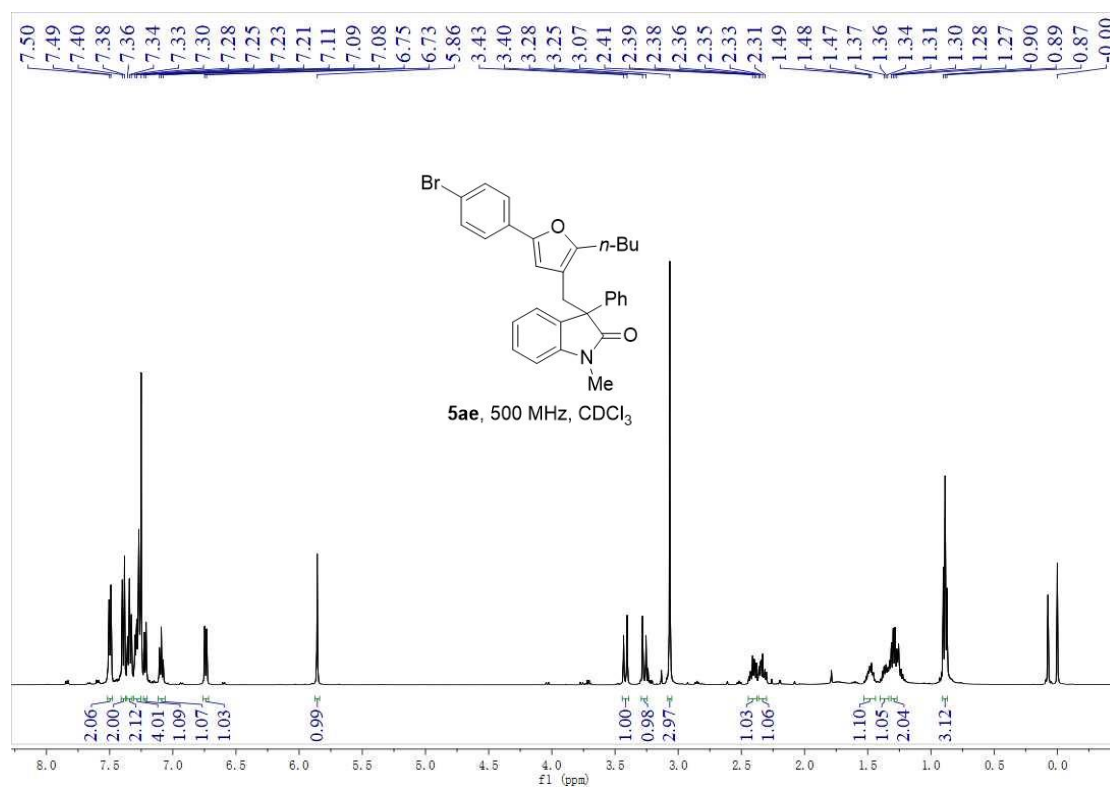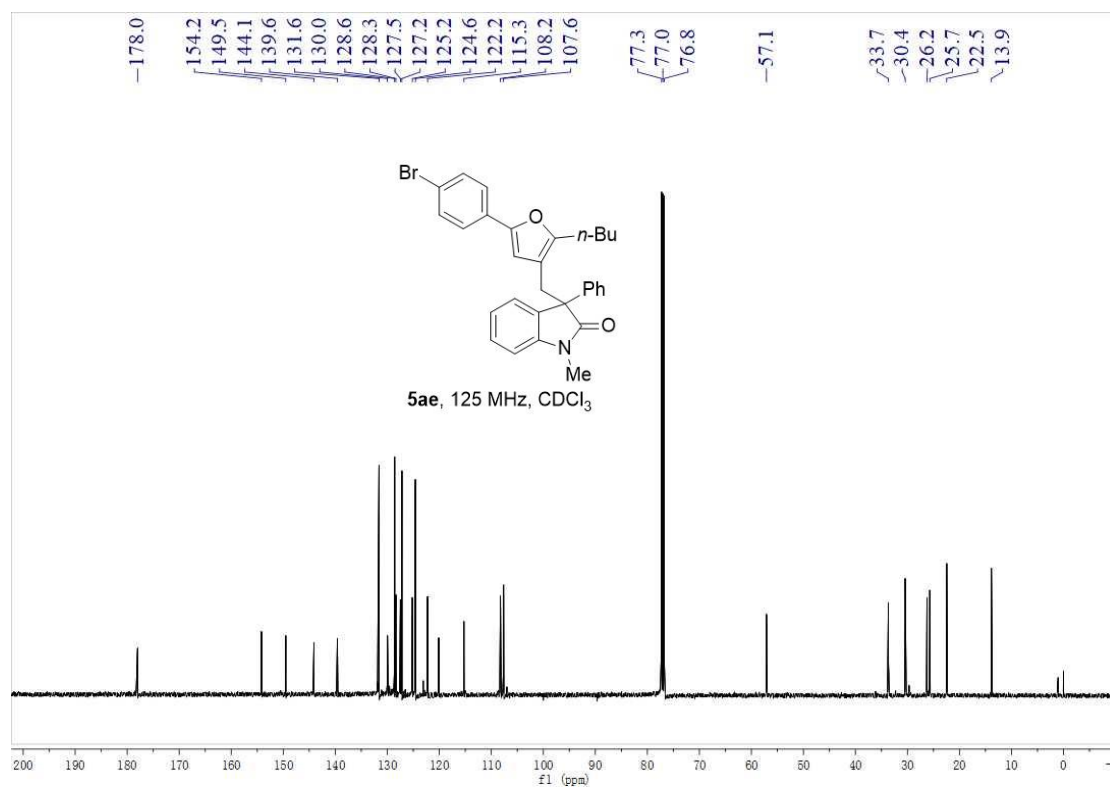





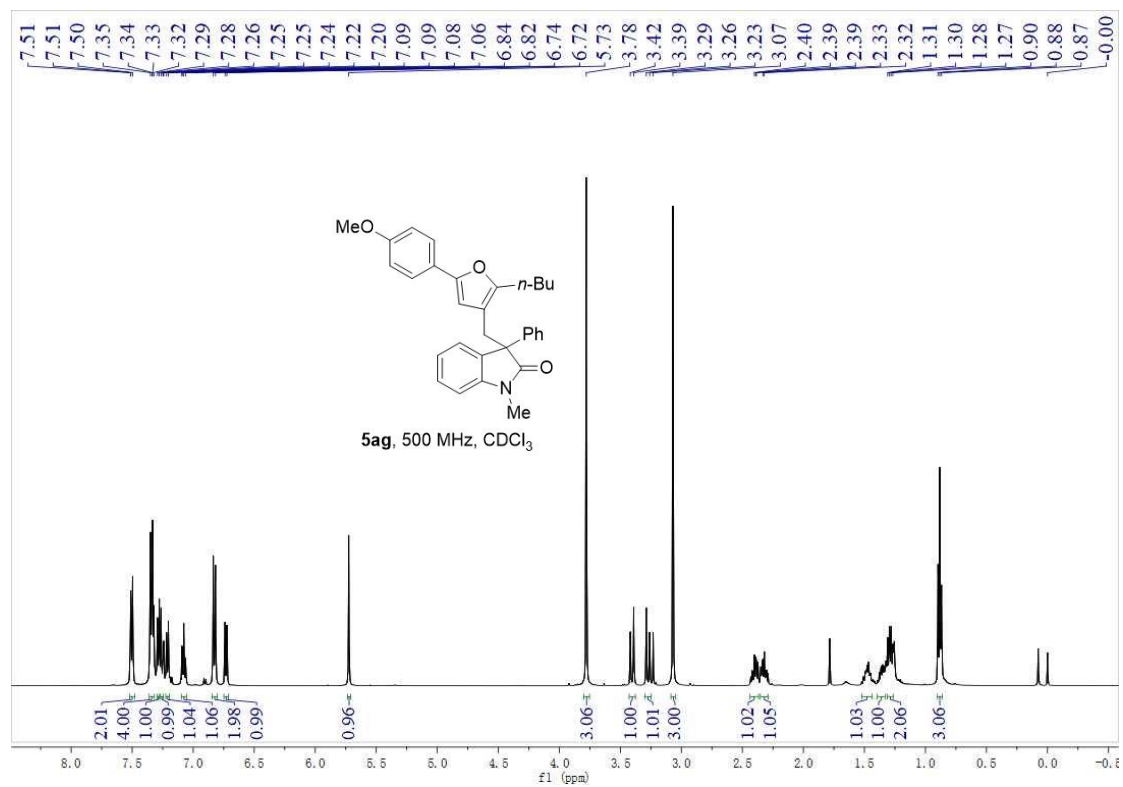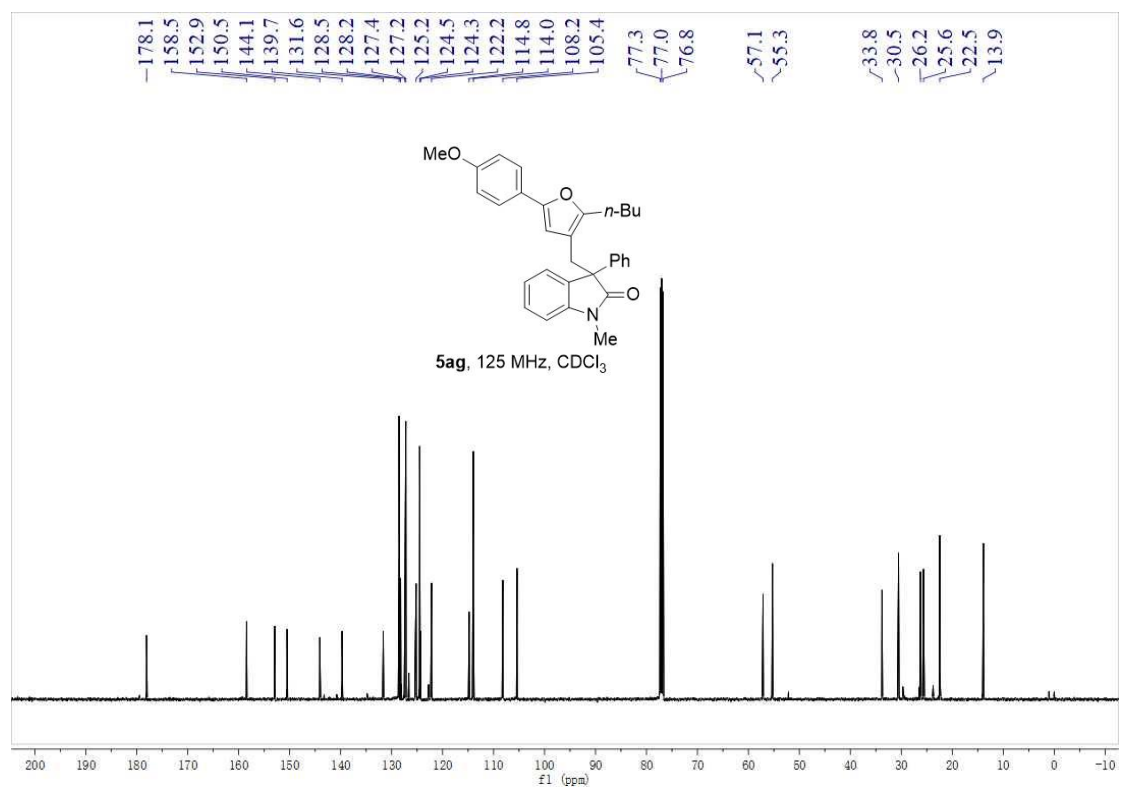

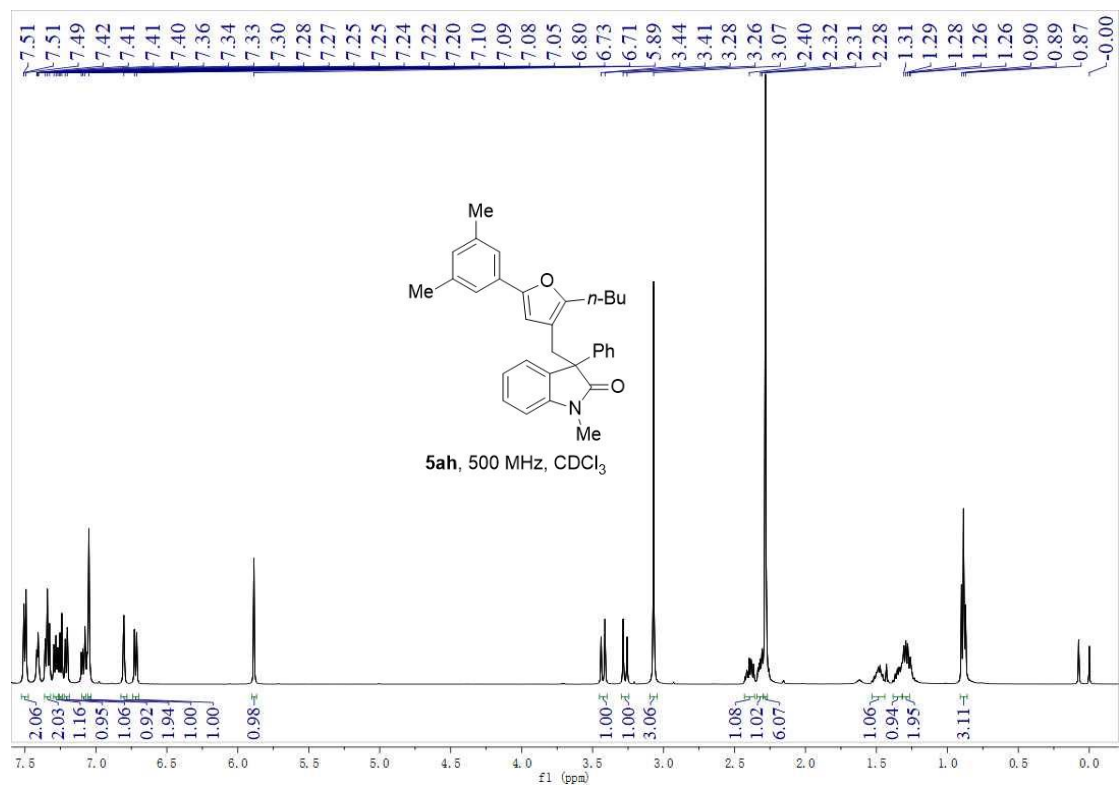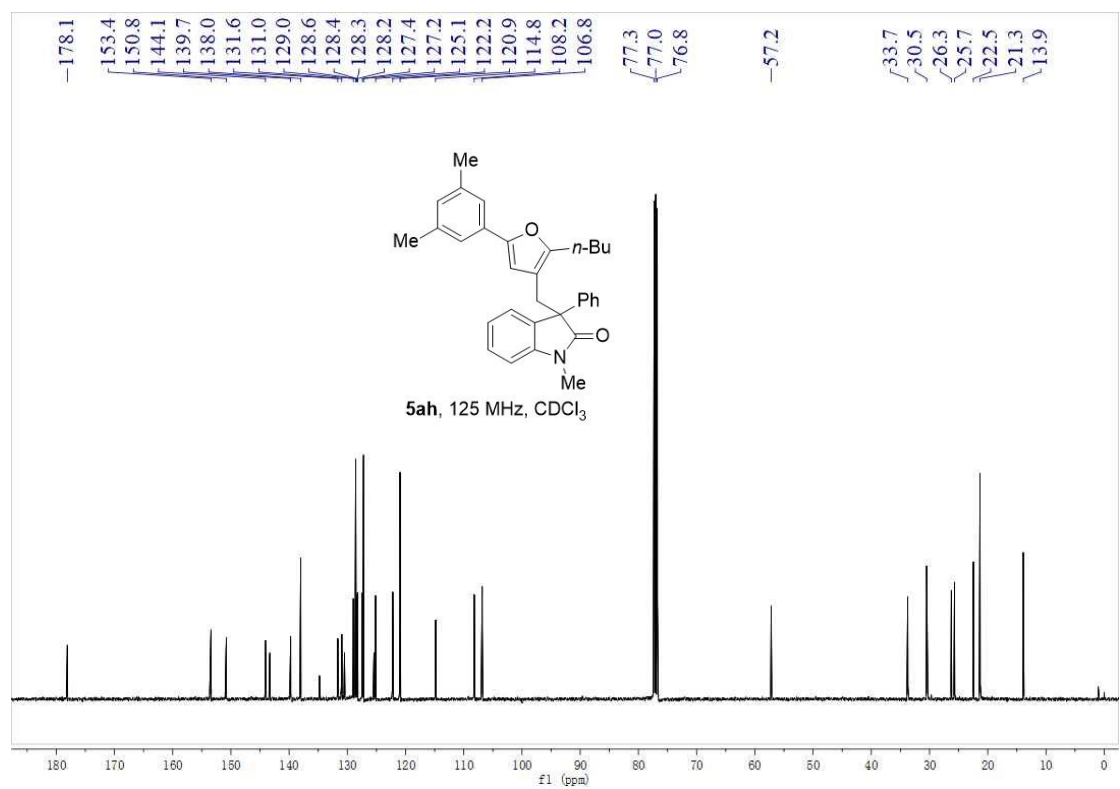

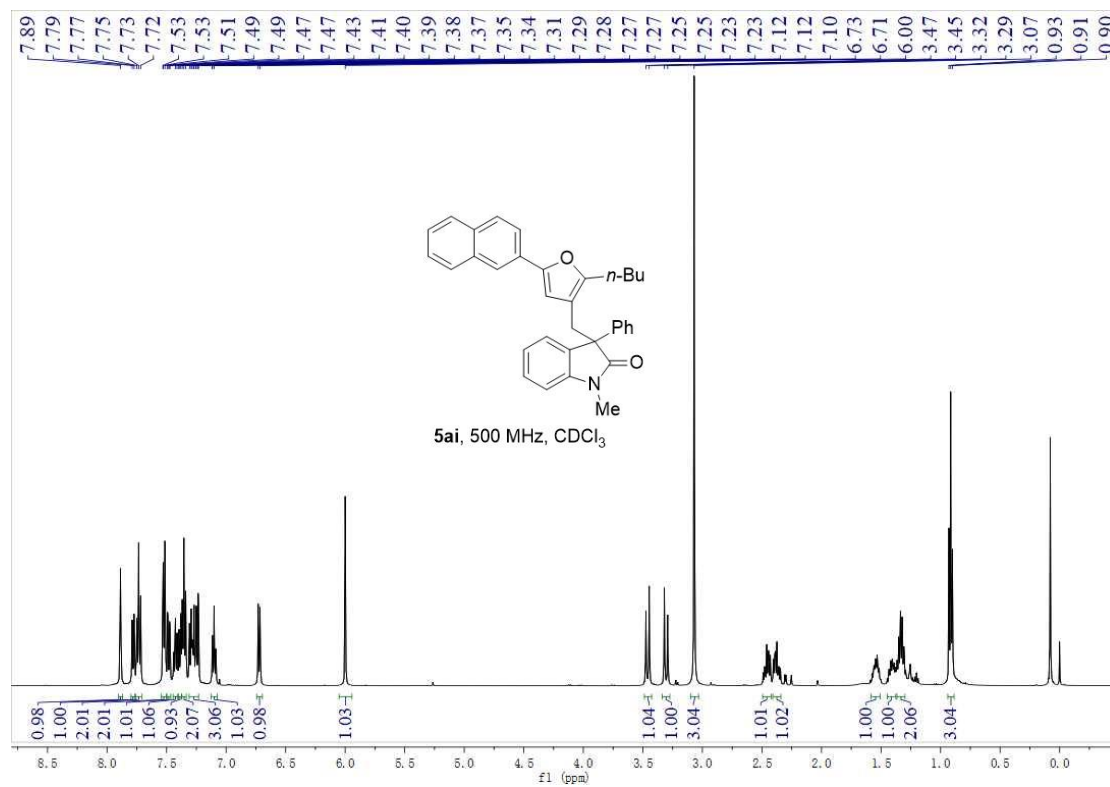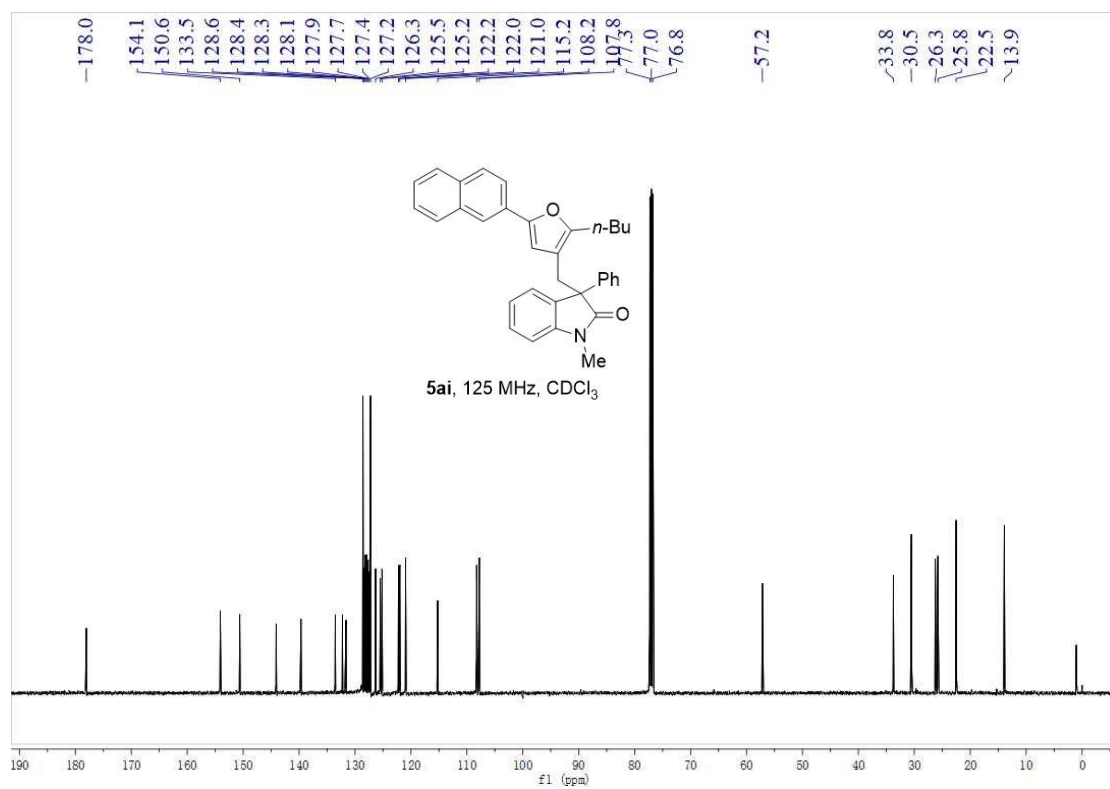

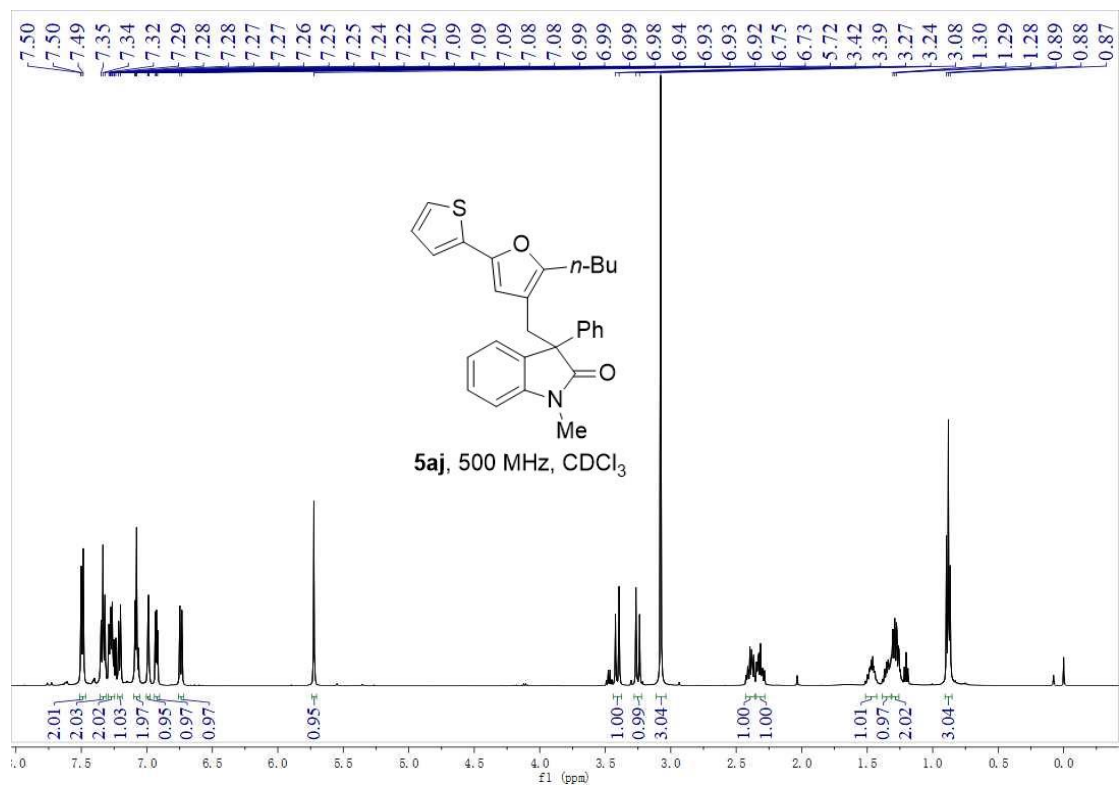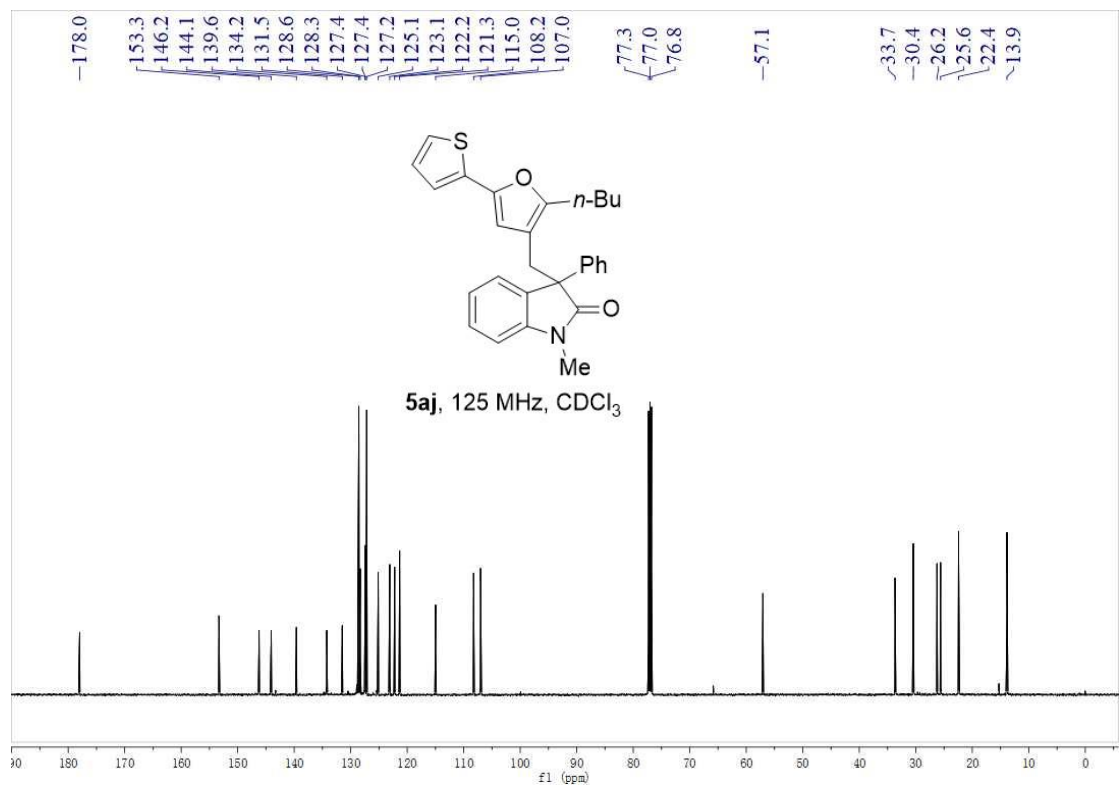

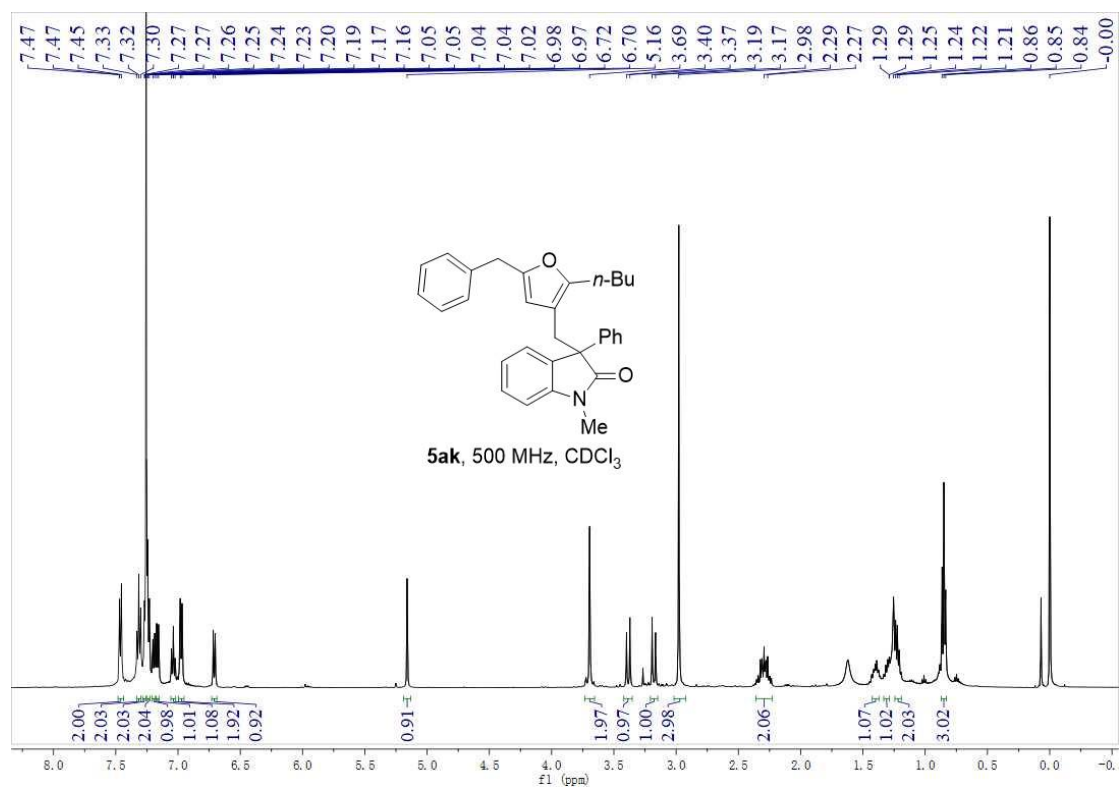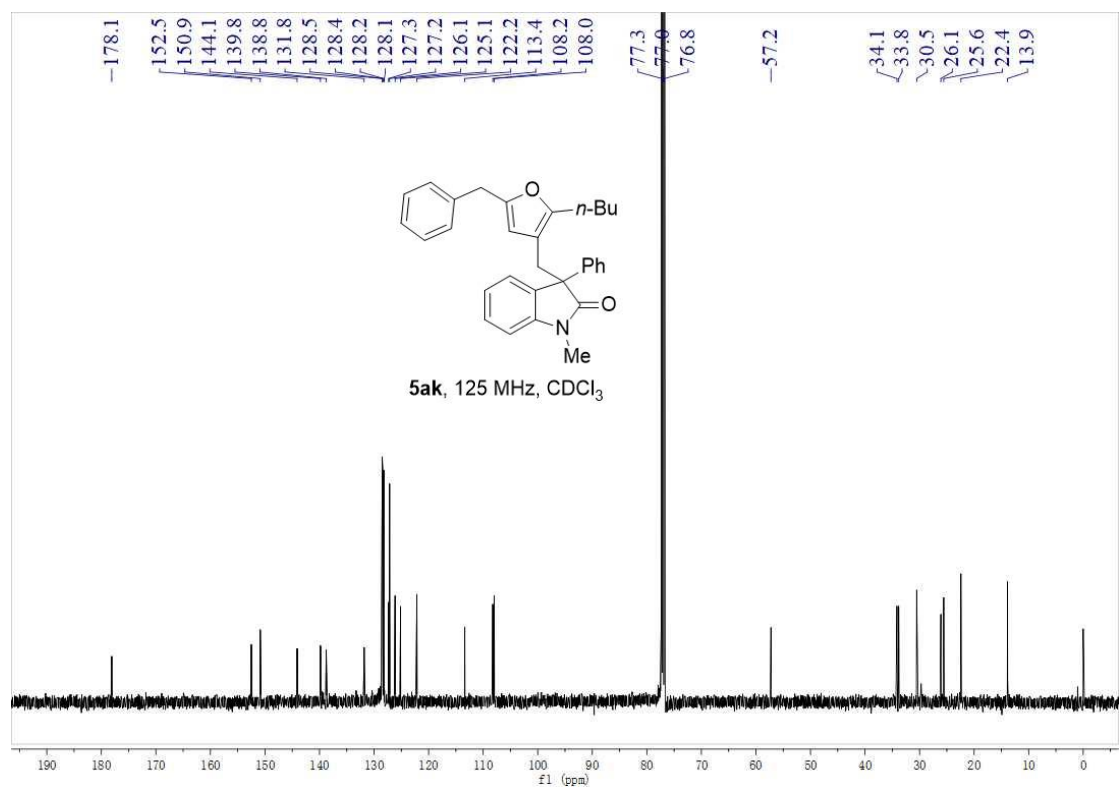

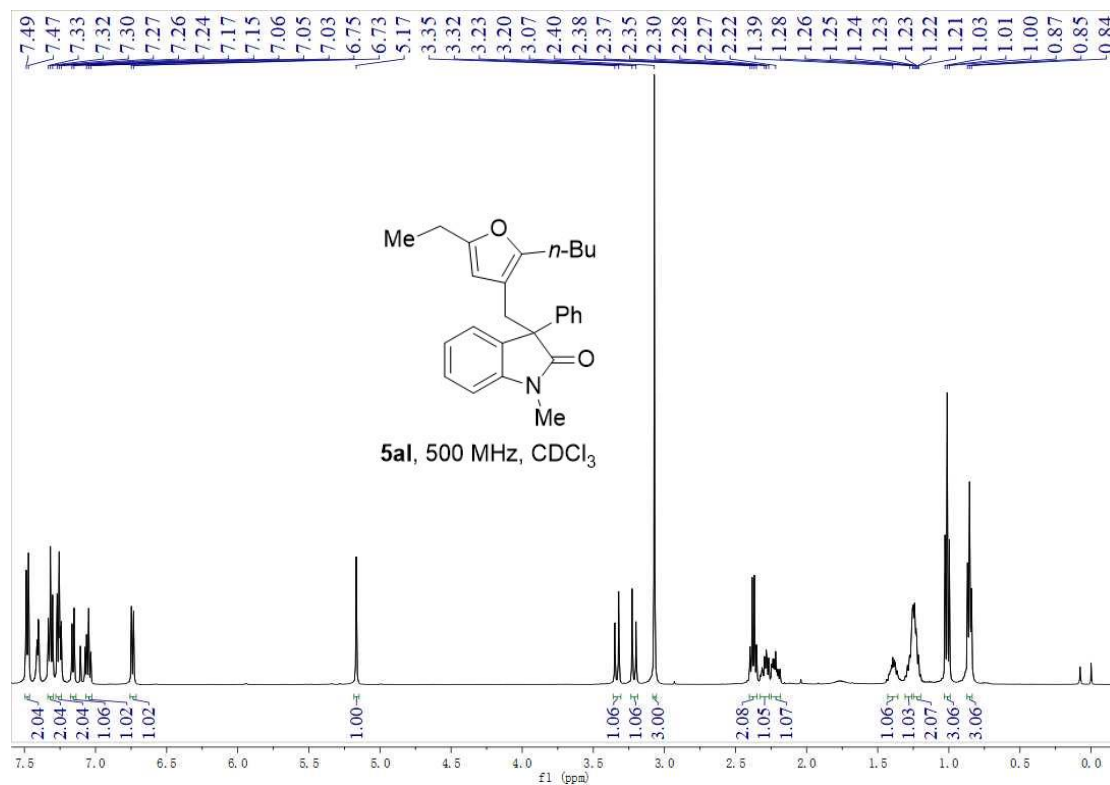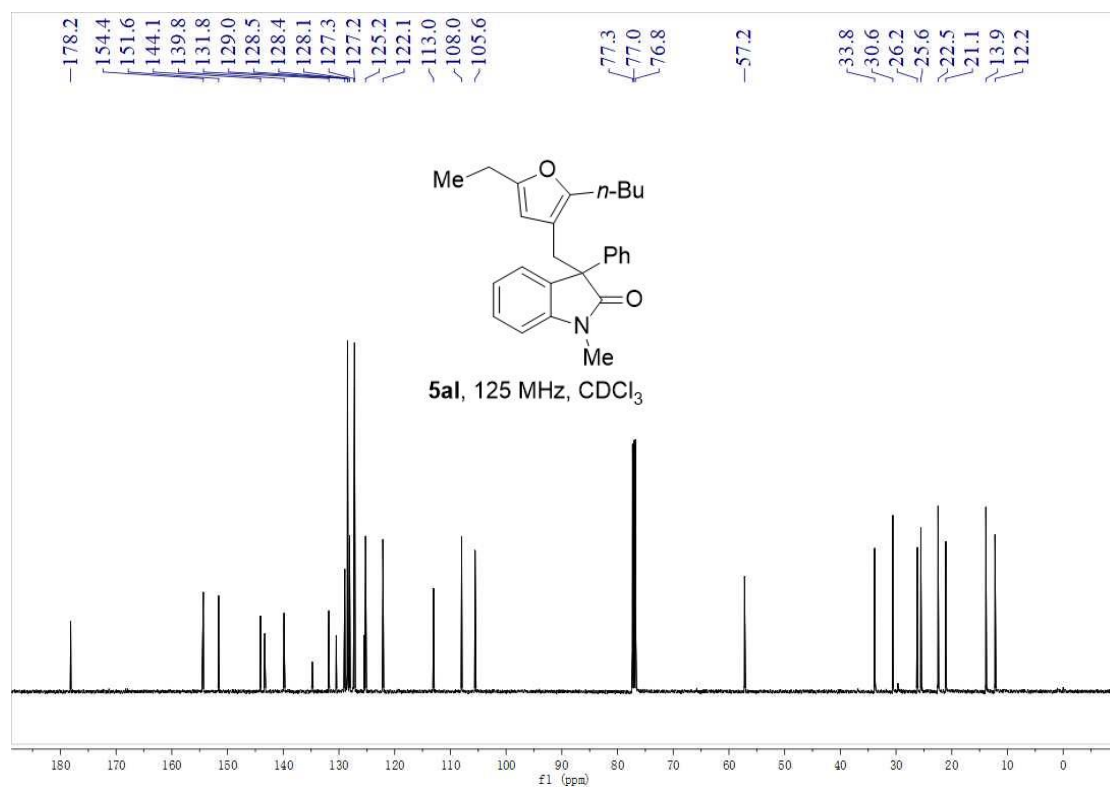



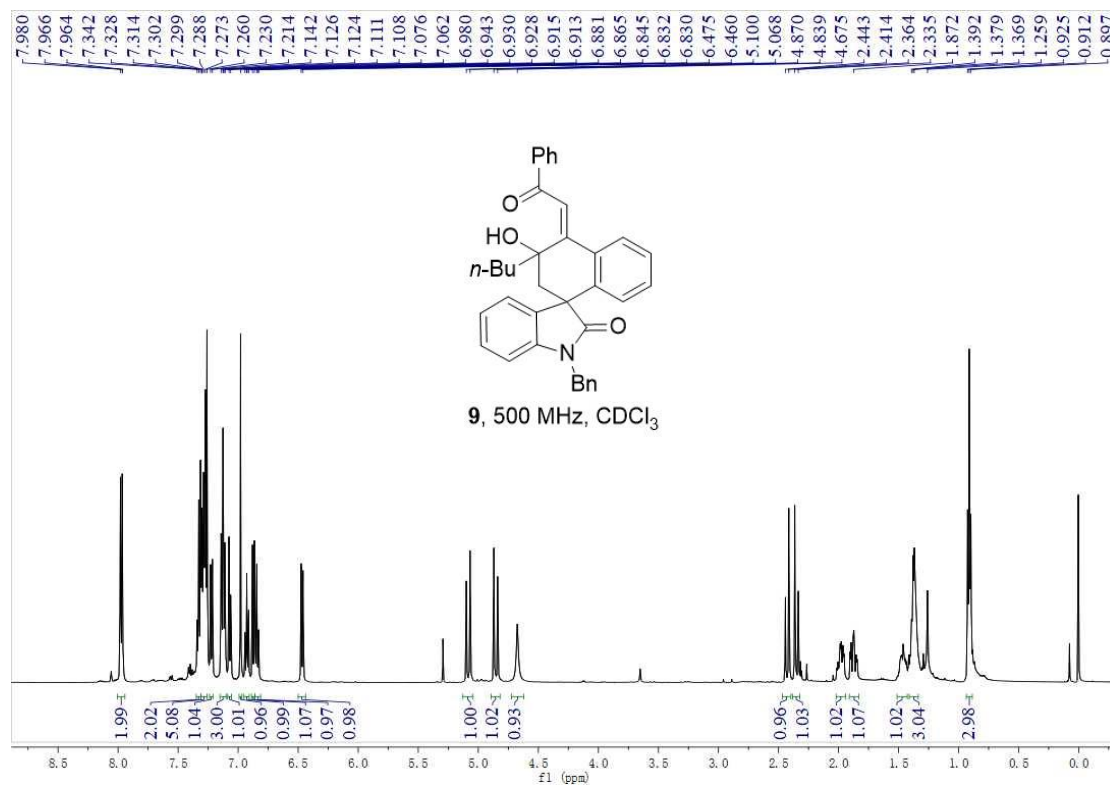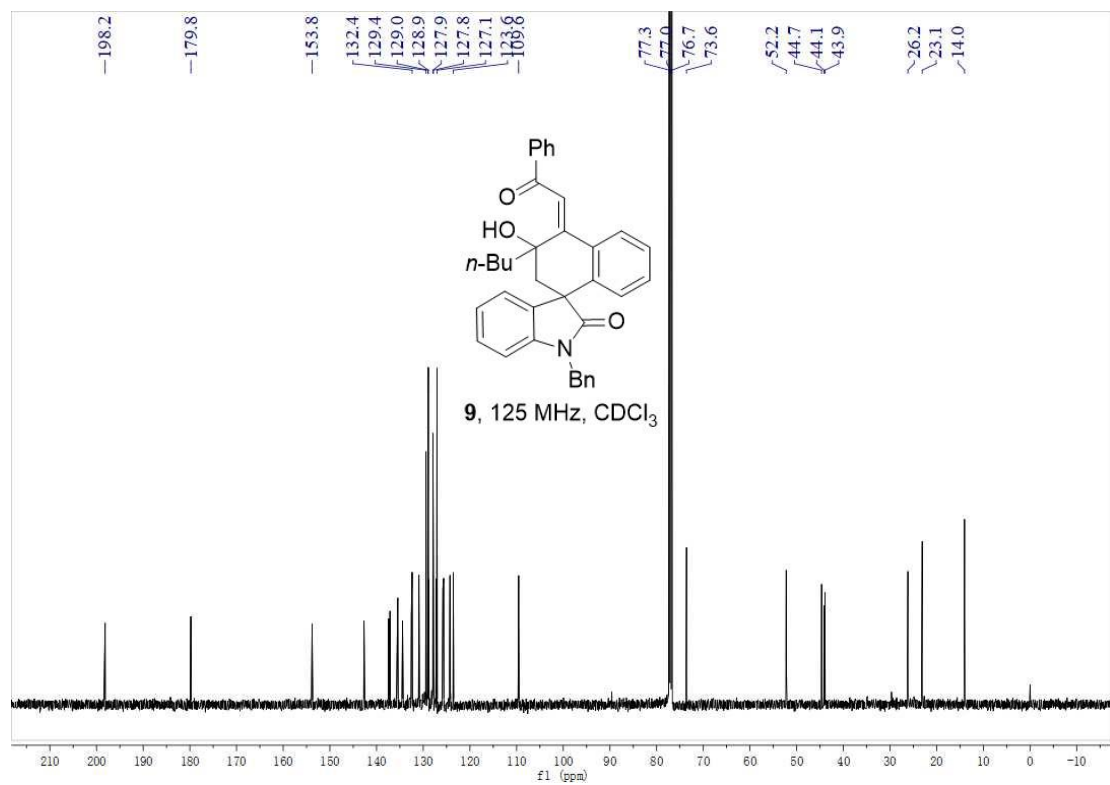



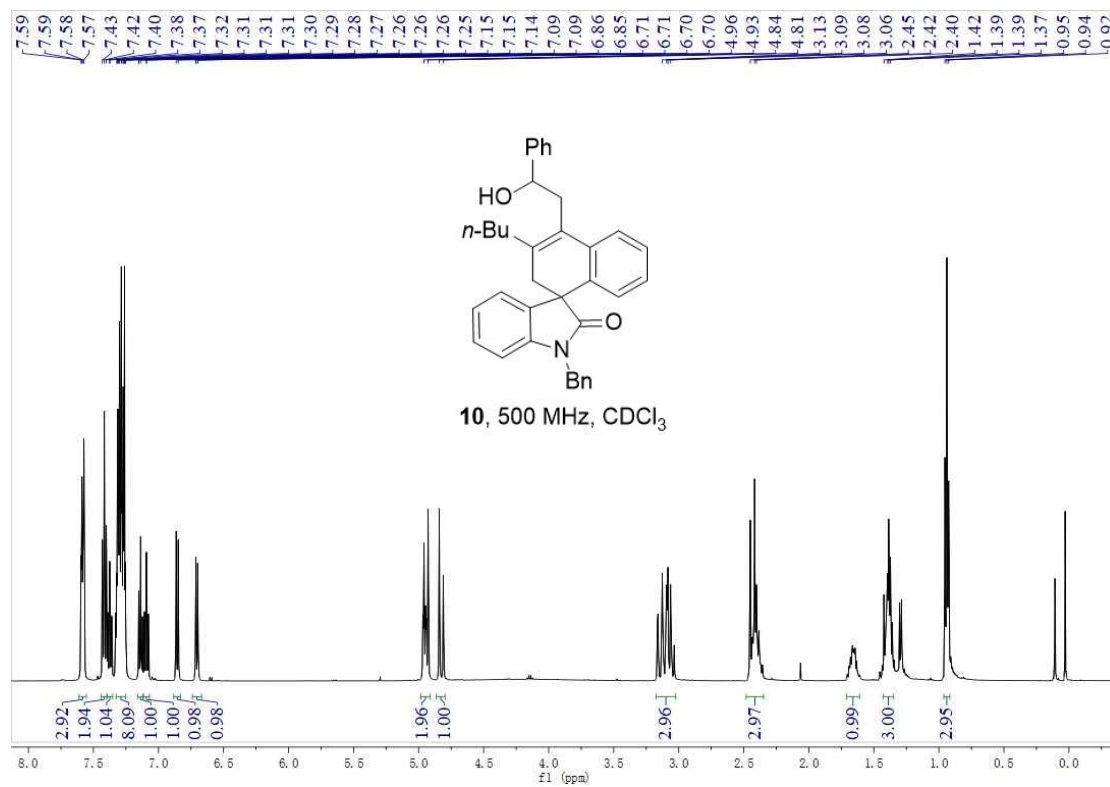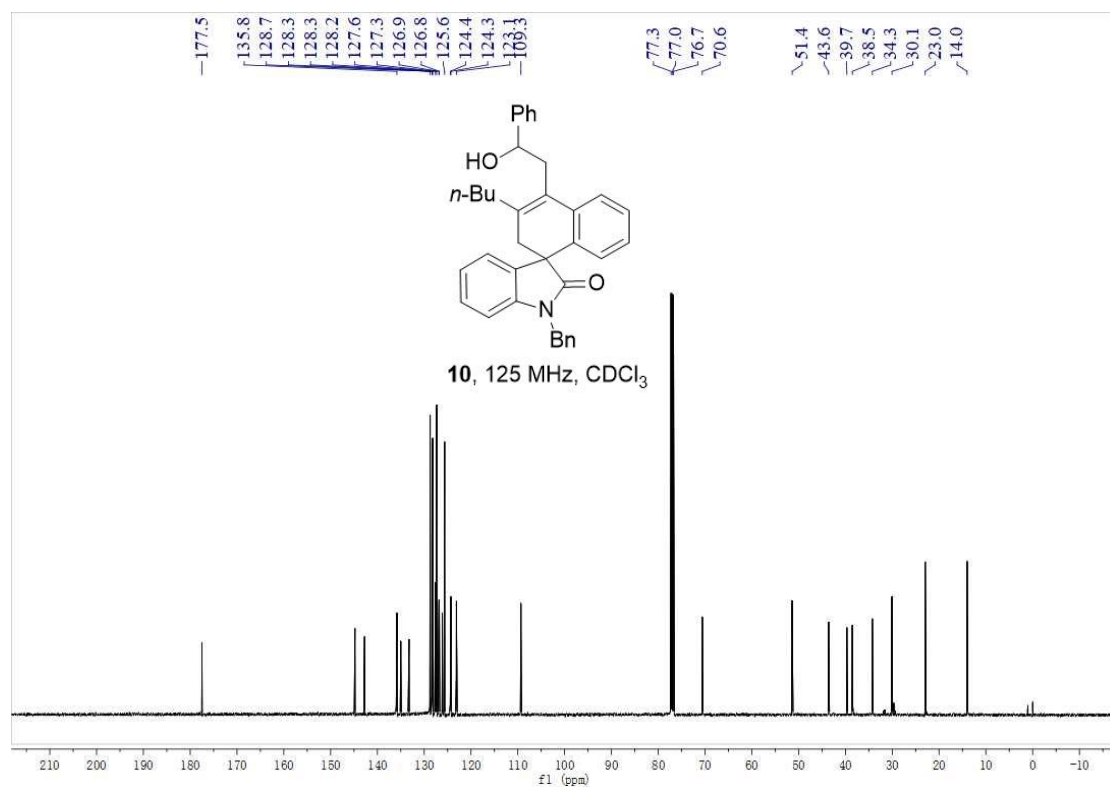

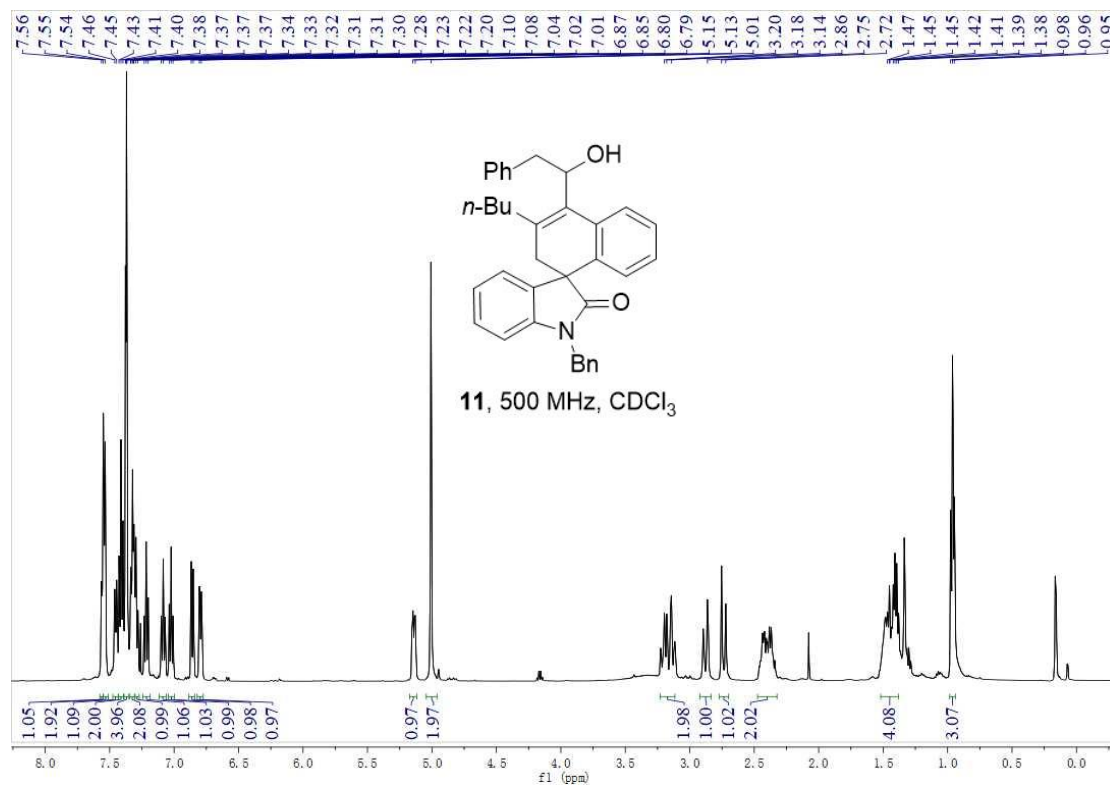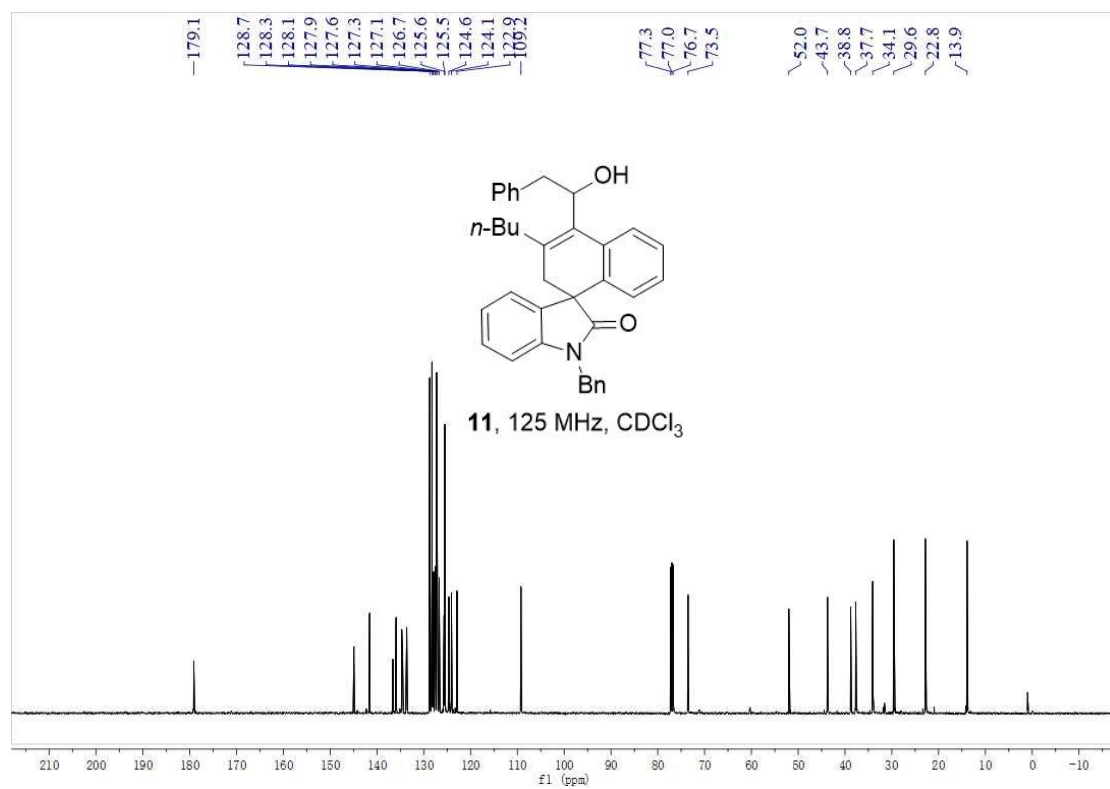

Supplement: d3qo01776a1.pdf [file d3qo01776a1.pdf]
